# Supplementary material for: Predictors of treatment failure during the first year in newly diagnosed type 2 diabetes patients: a retrospective, observational study
Source: PeerJ. 2021 Mar 2;9:e11005. doi: 10.7717/peerj.11005 (PMC7934644; doi:10.7717/peerj.11005)
Supplement: Supplemental Information 1 [file peerj-09-11005-s001.xlsx]

## Sheet: Dataset
ID	Treatment_Failure	Age_yrs	Gender	Education	Family_Hx_DM	Smoking	Alcohol	Physical_activity	Medication_adherence	Knowledge_GC	Willingness_DSM	SMBG	BMI	HbA1c_baseline	HbA1c_3M_%	HbA1c_6M_%	HbA1c_9M_%	HbA1c_12M_%	Mean_BP_mmHg	Total_Cholesterol_mg/dl	Triglyceride_mg/dl	HDL_mg/dl	LDL_mg/dl	eGFR	GPT	Anti_diabetic_medication	Anti_hypertension_agent	Use_of_statins	Use_of_fibrates	Comorbidity_CCI score	CHF_baseline	CAD_baseline	CVA_baseline	CKD_baseline	HbA1c≥8_subgroup						Outcome_rev	enroll_cohort	TC_10	TG_10	LDL_10	egfr_10	gpt_10
1	0	64	0	2	1	0	0	0	1	1	1	0	31.75	6.9	6	6	6.7	6.5	118.333	194	132	50	118	63.0364	23	0	1	0	0	4	0	0	0	0	0						0	1	19.4	13.2	11.8	6.30364	2.3
2	0	51	0	3	1	0	0	1	1	1	0	1	18.77	6	5.9	6.1	6.1	5.9	70	205	91	79	93	76.7262	16	0	1	0	0	1	0	0	0	0	0						0	2	20.5	9.1	9.3	7.67262	1.6
3	0	57	0	2	1	0	0	2	1	0	1	0	27.88	6.8	6.4	6.7	6.7	6.6	102	266	100	67	186	73.9322	63	0	0	1	0	3	0	0	1	0	0						0	1	26.6	10	18.6	7.39322	6.3
4	0	64	0	2	1	0	0	0	1	1	1	0	29.25	6.7	6.4	6.4	6.3	6.3	110	204	204	49	126	94.8378	25	0	1	1	0	2	0	0	0	0	0						0	2	20.4	20.4	12.6	9.48378	2.5
5	0	62	0	0	0	0	0	0	1	1	1	0	46.14	7.8	7.1	7.1	5.9	6.2	84	215	87	86	111.6	84.5148	19	0	1	1	0	1	1	0	0	0	0						0	1	21.5	8.7	11.16	8.45148	1.9
6	0	59	1	3	1	0	0	2	1	1	1	1	23.57	6.9	6.6	6.6	6.7	6.2	89.3333	165	74	45	97	72.29	28	0	1	1	0	1	0	0	0	0	0						0	1	16.5	7.4	9.7	7.229	2.8
7	0	44	1	2	1	1	0	2	1	1	1	0	28.7	7	7	6.1	6.1	6.5	97	135	132	39	76	97.1963	53	0	0	1	0	2	0	0	0	0	0						0	1	13.5	13.2	7.6	9.71963	5.3
8	1	58	1	3	0	0	0	0	1	1	1	0	26.91	6.7	6.7	6.8	6.8	7.6	95.3333	179	321	38	96	83.5228	21	0	0	0	1	2	0	0	0	0	0						1	1	17.9	32.1	9.6	8.35228	2.1
9	0	64	0	0	0	0	0	0	1	1	1	1	17.94	6.6	6.6	6.6	6.6	6.4	85	185	149	47	107	132.99	16	0	1	1	0	1	0	0	0	0	0						0	2	18.5	14.9	10.7	13.299	1.6
10	1	47	0	3	1	0	0	0	1	1	1	0	26.35	7.5	6.5	6.7	6.8	8.3	92	147	151	50	82	76.8848	45	0	1	1	0	1	0	0	0	0	0						1	1	14.7	15.1	8.2	7.68848	4.5
11	0	49	1	3	0	0	0	2	1	0	0	0	31.01	7.2	6.5	6.6	7	6.8	112	160	88	49	92	64.3507	31	0	1	1	0	3	0	1	0	0	0						0	1	16	8.8	9.2	6.43507	3.1
12	0	61	0	2	0	0	0	1	1	1	1	0	24.35	6.7	6.4	6.6	6.6	6	101.333	190	94	56	111	128.39	90	0	1	1	0	2	1	0	0	0	0						0	2	19	9.4	11.1	12.839	9
13	0	55	0	3	1	0	0	2	1	1	1	0	19.98	6.6	6.1	6.2	6.1	5.7	109.333	178	47	59	107	74.4702	32	0	1	0	0	1	0	0	0	0	0						0	1	17.8	4.7	10.7	7.44702	3.2
14	0	51	1	3	1	0	0	0	1	1	1	0	25.71	6.8	7	6.5	6.2	6	94.6667	195	207	51	110	70.5723	29	0	0	0	0	1	0	0	0	0	0						0	1	19.5	20.7	11	7.05723	2.9
15	1	64	1	1	0	0	0	2	1	1	1	0	33.18	7.5	15.7	8.9	8.9	7.2	93.6667	159	140	32	97	53.04	40	0	1	1	0	4	1	0	0	1	0						1	2	15.9	14	9.7	5.304	4
16	0	46	0	2	0	0	0	0	1	1	1	0	33.8	5.7	6.5	6.3	6.4	6.4	101.333	243	144	49	151	67.4072	34	0	0	1	0	2	0	0	0	0	0						0	1	24.3	14.4	15.1	6.74072	3.4
17	0	63	0	1	1	0	0	1	1	0	1	0	22.65	6.3	6.1	6.4	6.5	6.2	75.3333	169	76	56	105	142.64	21	0	0	1	0	1	0	0	0	0	0						0	2	16.9	7.6	10.5	14.264	2.1
18	0	59	1	3	1	1	0	0	1	1	1	1	24.57	6.2	6.3	6.6	6.8	6.5	95.6667	108	100	22	66	84.98	22	0	0	1	0	1	0	0	0	0	0						0	2	10.8	10	6.6	8.498	2.2
19	0	47	1	1	0	1	0	0	0	1	0	0	27.21	7.3	7.2	6.7	6.7	6.8	103.333	172	182	43	92	80.0944	40	0	0	0	0	1	0	0	0	0	0						0	1	17.2	18.2	9.2	8.00944	4
20	0	55	1	2	1	1	0	2	1	1	1	0	32.03	6.7	6.3	5.9	6.6	6.6	106.333	188	152	39	121	69.7582	33	0	1	1	0	2	0	0	0	0	0						0	1	18.8	15.2	12.1	6.97582	3.3
21	0	46	0	2	1	0	0	1	1	0	0	1	28.88	7.6	6.8	6.8	7.8	6.3	102.333	216	105	45	152	67.4072	40	0	0	0	0	2	0	0	0	0	0						0	1	21.6	10.5	15.2	6.74072	4
22	0	49	1	2	1	0	0	1	1	0	0	0	27.04	6.4	6.7	6.7	6	5.6	99.3333	196	95	42	131	64.0873	43	0	1	1	0	1	1	1	0	0	0						0	1	19.6	9.5	13.1	6.40873	4.3
23	1	58	0	1	1	0	0	0	1	1	1	0	24.59	6.6	6.6	6.7	7	7.2	81	137	93	46	73	123.86	16	0	0	0	0	1	0	0	0	0	0						1	2	13.7	9.3	7.3	12.386	1.6
24	0	61	1	2	0	1	0	2	1	0	1	0	29.02	6.9	6.1	5.9	5.8	5.8	114.333	205	423	40	102	73.3309	30	0	1	0	1	2	0	0	0	0	0						0	1	20.5	42.3	10.2	7.33309	3
25	0	61	0	1	0	0	0	0	0	1	1	0	23.74	6.7	10	6	6.9	6.7	82	198	119	40	136	59.8	66	0	0	0	0	1	0	0	0	0	0						0	2	19.8	11.9	13.6	5.98	6.6
26	0	55	0	1	0	0	0	0	1	0	1	0	26.49	6.8	6.2	6.3	6.1	5.8	115	238	128	45	166	57.5637	20	0	1	1	0	1	0	0	0	0	0						0	1	23.8	12.8	16.6	5.75637	2
27	1	60	1	3	0	0	0	2	0	1	1	0	28.26	7.6	7.1	7.4	8.1	7.5	79	148	106	51	78	104.313	27	0	1	1	0	3	0	1	0	0	0						1	1	14.8	10.6	7.8	10.4313	2.7
28	0	46	1	3	1	0	0	0	1	0	0	0	23.31	5.5	5.4	5.4	5.8	5.5	92.3333	183	349	33	81	72.0661	34	0	1	0	1	1	0	0	0	0	0						0	1	18.3	34.9	8.1	7.20661	3.4
29	1	52	0	2	1	0	0	0	1	1	0	0	40.65	6.4	6.6	6.8	7.3	7.3	119	182	79	61	101	123.83	23	0	1	1	0	2	0	0	0	0	0						1	2	18.2	7.9	10.1	12.383	2.3
30	0	44	0	1	0	0	0	0	1	0	1	0	33.62	7	6.4	7.4	5.6	6.8	95	236	281	39	137	90.4892	199	0	1	1	0	2	0	0	0	0	0						0	1	23.6	28.1	13.7	9.04892	19.9
31	0	59	0	1	0	0	0	0	1	1	1	0	27.89	6.1	6	6.3	6.4	6.3	97	175	111	63	86	63.8677	26	0	0	1	0	2	0	0	0	0	0						0	1	17.5	11.1	8.6	6.38677	2.6
32	0	58	0	1	0	0	0	0	1	1	1	0	23.83	5.9	6.2	6.2	6.9	6.9	109	302	174	43	202	92.8593	25	0	1	1	0	1	0	0	0	0	0						0	1	30.2	17.4	20.2	9.28593	2.5
33	0	53	0	2	1	0	0	0	0	0	0	0	24.77	4.9	4.9	4.9	4.9	4.9	92	162	174	52	88	65.4965	33	0	0	0	0	1	0	0	0	0	0						0	1	16.2	17.4	8.8	6.54965	3.3
34	0	57	0	1	0	0	0	0	1	1	1	0	30.27	6.5	6.3	6.2	6.2	6.1	82.6667	113	78	34	56	84.55	26	0	1	1	0	1	0	0	0	0	0						0	1	11.3	7.8	5.6	8.455	2.6
35	0	59	1	1	1	0	0	1	1	1	1	0	21.96	7.4	6.4	6.2	6.6	6.3	108.667	143	63	51	73	100.049	15	0	0	1	0	1	0	0	0	0	0						0	2	14.3	6.3	7.3	10.0049	1.5
36	0	60	0	2	1	0	0	2	1	1	1	0	20.78	7.2	5.9	5.9	5.9	5.8	90	191	86	57	118	135.169	14	2	0	1	0	1	0	0	0	0	0						0	2	19.1	8.6	11.8	13.5169	1.4
37	0	48	0	2	1	0	0	1	1	1	1	0	26.45	6.7	7.6	7.6	5.8	5.6	102.667	153	127	43	83	108.789	17	0	1	1	0	1	0	0	0	0	0						0	2	15.3	12.7	8.3	10.8789	1.7
38	0	49	1	3	1	0	0	0	1	1	1	0	29.48	6.3	6	6	6.3	5.8	96.3333	168	111	38	117	81.634	44	0	1	0	0	2	0	0	0	0	0						0	1	16.8	11.1	11.7	8.1634	4.4
39	1	42	0	1	1	0	0	0	1	0	1	0	29.38	6.4	6.3	10.4	7.7	7.5	88	226	509	44	96	78.6605	89	0	1	1	0	2	0	0	0	0	0						1	1	22.6	50.9	9.6	7.86605	8.9
40	0	47	0	2	1	0	0	0	1	1	1	0	26.65	6.5	6.6	6.6	6.6	6.6	102	183	107	58	108	214.671	20	0	1	1	0	1	0	0	0	0	0						0	2	18.3	10.7	10.8	21.4671	2
41	0	46	1	3	1	0	0	2	1	1	0	1	22.83	6.4	5.8	5.7	5.7	5.6	79.6667	121	110	31	70	70.2784	34	0	0	0	0	4	0	0	0	0	0						0	1	12.1	11	7	7.02784	3.4
42	0	52	0	1	0	0	0	0	1	0	1	0	27.61	7.1	7.1	7.2	6.6	6.7	87.3333	131	321	38	58	111.835	48	0	1	1	0	1	0	0	0	0	0						0	2	13.1	32.1	5.8	11.1835	4.8
43	0	59	1	1	0	0	0	0	1	1	1	0	26.89	5.9	6.1	5.9	5.9	5.9	105.667	145	123	43	86	68.7535	32	0	1	0	0	1	0	0	0	0	0						0	1	14.5	12.3	8.6	6.87535	3.2
44	0	51	1	3	1	0	0	2	1	1	1	1	23.45	7.6	6.5	6.6	6.5	6.5	101.667	182	87	44	114	124.566	18	0	0	1	0	3	0	0	0	0	0						0	2	18.2	8.7	11.4	12.4566	1.8
45	0	50	0	2	0	0	0	2	1	1	1	0	19.07	6.1	6	6.4	6.1	6.5	79.6667	214	108	55	135	109.6	18	0	0	1	0	1	0	0	0	0	0						0	2	21.4	10.8	13.5	10.96	1.8
46	0	64	0	2	1	0	0	1	1	#NULL!	#NULL!	0	25.99	6.9	6.5	6.7	6.5	6.6	88	120	133	32	71	93.7226	23	0	1	1	0	2	1	0	0	0	0						0	2	12	13.3	7.1	9.37226	2.3
47	0	60	0	1	1	0	0	2	1	1	1	1	27.53	5.9	5.9	5.9	5.9	5.9	103.667	214	108	45	146	138.815	21	0	0	1	0	1	0	0	0	0	0						0	2	21.4	10.8	14.6	13.8815	2.1
48	0	55	0	1	1	0	0	2	1	0	1	0	34.93	7.4	6.2	6.4	6.4	5.7	82.6667	212	130	63	130	107.415	48	0	0	1	0	1	0	0	0	0	0						0	1	21.2	13	13	10.7415	4.8
49	0	61	0	1	0	0	0	2	1	1	1	1	26.62	6.6	6.6	6.5	6.1	5.8	92.6667	167	161	52	78	73.9875	21	0	1	0	0	3	0	0	0	0	0						0	2	16.7	16.1	7.8	7.39875	2.1
50	1	47	0	1	0	0	0	0	1	0	1	0	31.44	6.2	6.5	6.2	6.1	7.1	94.3333	178	149	54	100	76.5569	23	0	1	1	0	1	0	0	0	0	0						1	1	17.8	14.9	10	7.65569	2.3
51	0	58	1	3	0	0	1	2	0	1	1	1	24.67	5.7	5.9	5.6	5.6	6	78	147	140	51	66	74.1734	58	0	0	1	0	2	0	0	0	0	0						0	2	14.7	14	6.6	7.41734	5.8
52	0	59	1	3	0	0	1	1	1	1	0	1	23.32	6.1	6.2	6.4	6.1	6.2	87	163	95	48	98	103.406	30	0	0	1	0	2	1	0	0	0	0						0	2	16.3	9.5	9.8	10.3406	3
53	0	64	0	1	0	0	0	0	1	0	1	0	27.01	7.9	6.5	6.5	6	6.2	93.3333	212	64	67	129	72.214	24	0	0	1	0	2	0	0	0	0	0						0	1	21.2	6.4	12.9	7.2214	2.4
54	0	41	0	2	1	0	0	0	1	1	1	0	17.85	6.2	6.5	6.5	6.3	6.3	99.3333	172	95	61	84	92.2155	17	0	0	0	0	3	0	0	0	0	0						0	1	17.2	9.5	8.4	9.22155	1.7
55	1	50	0	2	1	0	0	0	1	0	1	0	22.87	7.3	8.4	8.3	7.8	7.4	92.6667	168	63	85	70	109.499	9	0	0	0	0	1	0	0	0	0	0						1	1	16.8	6.3	7	10.9499	0.9
56	0	54	0	2	0	0	0	1	1	1	1	0	36.19	7.3	5.8	6	5.7	5.8	96.6667	177	168	42	106	80.5277	20	0	1	1	0	2	1	0	0	0	0						0	2	17.7	16.8	10.6	8.05277	2
57	0	51	0	1	0	0	0	0	1	1	1	0	27.98	7	7	6.3	6.7	6.6	91.3333	206	177	55	135	151.712	56	0	0	1	0	1	0	0	0	0	0						0	1	20.6	17.7	13.5	15.1712	5.6
58	0	34	0	2	1	0	0	2	1	0	1	0	33.2	6.8	7.4	7.4	6.3	6.3	81.6667	299	169	38	225	164.664	25	0	0	1	0	1	0	0	0	0	0						0	1	29.9	16.9	22.5	16.4664	2.5
59	0	53	1	2	0	0	0	2	1	1	1	0	23.44	6.3	6.4	6.6	7	6.7	76.6667	164	104	50	101	70.0234	25	0	1	1	0	1	1	1	0	0	0						0	1	16.4	10.4	10.1	7.00234	2.5
60	0	62	1	2	0	0	0	2	1	1	1	0	25.9	6.5	6.6	6.7	6.6	6.3	100	177	300	42	82	103.628	21	0	1	1	0	2	0	1	1	0	0						0	2	17.7	30	8.2	10.3628	2.1
61	1	58	0	1	0	0	0	0	1	1	1	0	25.43	6.6	8.4	9.5	9.3	7.3	80.6667	147	104	54	72	73.4164	70	0	1	0	0	3	0	0	0	0	0						1	1	14.7	10.4	7.2	7.34164	7
62	1	57	0	2	0	0	0	0	1	1	1	0	35.49	7.1	6.3	6.3	6.2	8.3	94.6667	205	87	38	137	56.9464	27	0	1	1	0	1	0	0	0	0	0						1	1	20.5	8.7	13.7	5.69464	2.7
63	1	61	0	2	0	0	0	2	1	0	1	0	22.38	7.3	7.6	9.1	9.3	7.5	127.333	162	97	53	93	72.9213	33	0	1	0	0	4	0	0	0	0	0						1	1	16.2	9.7	9.3	7.29213	3.3
64	0	64	0	2	0	0	0	2	1	1	1	1	21.64	7	6.8	7.1	6.8	6.9	85.3333	126	98	41	73	142.187	44	0	1	1	0	1	0	0	0	0	0						0	2	12.6	9.8	7.3	14.2187	4.4
65	0	60	1	3	1	0	0	0	1	1	1	0	27.58	5.3	5	5.7	5.8	6.4	90.3333	172	156	44	88	68.282	25	0	0	0	0	1	0	0	0	0	0						0	1	17.2	15.6	8.8	6.8282	2.5
66	1	57	0	2	0	0	0	2	1	1	1	0	29.51	6.9	7.1	7.4	7.5	7.5	99.6667	149	143	46	92	91.0478	30	0	1	1	0	1	0	0	0	0	0						1	2	14.9	14.3	9.2	9.10478	3
67	1	56	0	0	1	0	0	2	1	1	1	0	41.79	7.9	6.6	7.4	7.8	8.3	121	329	891	48	174	57.3535	25	0	1	1	1	1	0	0	0	0	0						1	1	32.9	89.1	17.4	5.73535	2.5
68	0	56	0	2	0	0	0	0	1	1	1	0	23.83	6.7	6.4	6.3	5.9	6.1	99.3333	202	122	59	129	65.0059	14	0	1	0	0	1	0	0	0	0	0						0	1	20.2	12.2	12.9	6.50059	1.4
69	0	54	1	2	0	1	1	0	1	0	0	0	24.62	5.7	5.7	5.2	5.2	5	105.667	215	90	80	110	87.609	27	0	1	1	0	2	0	0	0	0	0						0	1	21.5	9	11	8.7609	2.7
70	0	56	1	2	1	0	0	0	1	#NULL!	#NULL!	0	26.62	7.1	6.3	6.3	5.9	5.8	101	186	118	51	105	77.0186	41	0	1	0	0	2	0	0	0	0	0						0	1	18.6	11.8	10.5	7.70186	4.1
71	0	50	1	3	0	0	0	2	1	1	1	0	25	6.4	5.5	5.9	5.8	5.9	98.6667	177	121	43	116	85.0663	140	0	1	1	1	2	0	0	0	0	0						0	1	17.7	12.1	11.6	8.50663	14
72	0	54	1	3	0	1	1	1	1	1	1	0	20.96	6.8	7.2	6.5	6.6	6.6	104.333	213	54	95	88	62.8593	23	0	0	0	0	2	0	0	0	0	0						0	1	21.3	5.4	8.8	6.28593	2.3
73	0	51	1	3	1	0	0	0	1	1	1	0	20.88	6	5.8	5.8	5.5	5.5	78.6667	226	70	65	144	58.1984	24	0	1	1	1	1	0	0	0	0	0						0	1	22.6	7	14.4	5.81984	2.4
74	0	55	0	3	0	0	0	2	1	1	1	1	27.84	6.7	6.7	6.8	6.8	6.8	92.6667	149	232	37	75	101.83	27	0	1	1	0	2	0	1	0	0	0						0	2	14.9	23.2	7.5	10.183	2.7
75	0	48	0	0	0	0	0	0	1	0	0	0	32.04	7.6	7.2	7.1	6.6	6.8	102.667	236	221	58	145	88.9383	44	0	1	0	0	2	0	0	0	0	0						0	1	23.6	22.1	14.5	8.89383	4.4
76	0	35	0	3	1	0	0	2	1	1	1	1	30.14	7.2	5.9	6.2	6.1	6.1	110	124	48	45	69	107.537	35	0	1	1	0	1	0	0	0	0	0						0	2	12.4	4.8	6.9	10.7537	3.5
77	0	53	1	3	1	1	0	0	1	1	1	1	19.82	5.5	5.5	5.3	5.5	5.7	81	165	78	79	76	88.2702	44	0	1	0	0	2	0	0	0	0	0						0	1	16.5	7.8	7.6	8.82702	4.4
78	0	53	0	3	1	0	0	2	1	1	1	1	27.13	7.7	6	6.1	6.4	6.4	103.333	168	83	57	101	169.904	14	0	0	0	0	1	0	0	0	0	0						0	1	16.8	8.3	10.1	16.9904	1.4
79	0	49	0	3	0	0	0	0	1	1	1	0	23.76	7.8	6.7	5.8	5.8	6	120	190	142	45	131	76.2371	65	0	1	1	0	2	0	0	0	0	0						0	1	19	14.2	13.1	7.62371	6.5
80	0	57	1	3	0	1	0	1	0	1	1	1	21.11	7.4	8.5	8.1	7	6.5	96.3333	213	127	36	136	118.185	26	2	0	1	0	2	0	0	0	0	0						0	1	21.3	12.7	13.6	11.8185	2.6
81	0	54	0	2	0	0	0	2	1	1	1	1	19.97	7.4	6.6	6.6	6.2	6	89.3333	87	76	47	27	98.4752	19	0	0	1	0	1	0	0	0	0	0						0	2	8.7	7.6	2.7	9.84752	1.9
82	0	55	1	2	0	0	0	2	1	0	0	0	32.79	6.5	6.3	6.1	6.1	6.2	110.333	163	150	49	87	57.3131	17	0	1	1	0	1	0	0	0	0	0						0	1	16.3	15	8.7	5.73131	1.7
83	0	31	0	3	1	0	0	0	1	1	1	1	27.18	6.7	5.4	5.9	5.7	5.7	76.6667	176	126	39	113	102	16	2	0	0	0	1	1	0	0	0	0						0	2	17.6	12.6	11.3	10.2	1.6
84	0	57	0	2	1	0	0	0	1	1	1	1	26.29	6.5	7.1	6.9	7.3	6.5	78.3333	167	55	43	100	145.552	28	0	0	1	0	1	0	0	0	0	0						0	1	16.7	5.5	10	14.5552	2.8
85	0	48	0	3	1	0	0	0	1	1	1	0	24.76	6.1	6	5.6	6.2	6.2	105	159	78	61	86	110.404	18	0	1	0	0	2	0	0	0	0	0						0	1	15.9	7.8	8.6	11.0404	1.8
86	0	58	1	2	0	0	0	2	1	1	1	0	20.58	6.6	6.1	6	6.3	6.2	101	240	189	47	162	62.1852	31	0	0	1	0	1	0	0	0	0	0						0	1	24	18.9	16.2	6.21852	3.1
87	0	55	1	3	0	0	0	1	1	1	1	0	27.02	6	5.8	5.9	5.9	5.6	91.6667	204	228	41	120	115.18	36	0	1	0	1	4	0	0	1	0	0						0	2	20.4	22.8	12	11.518	3.6
88	0	47	0	3	1	0	0	2	1	1	1	0	24.56	6.7	6.3	6.3	6.3	6.5	99.3333	240	113	56	163	110.873	15	0	0	1	0	1	0	0	0	0	0						0	1	24	11.3	16.3	11.0873	1.5
89	0	58	0	2	1	0	0	#NULL!	0	#NULL!	#NULL!	1	23.67	6.1	5.3	5.3	5.3	5.3	81.6667	185	89	39	129	108.562	62	0	0	0	0	1	0	0	0	0	0						0	2	18.5	8.9	12.9	10.8562	6.2
90	0	50	0	2	0	0	0	0	1	1	1	0	21.35	6.5	7.2	7	7.1	6.8	78.6667	233	59	54	143	94.4173	21	0	0	1	0	1	0	0	0	0	0						0	2	23.3	5.9	14.3	9.44173	2.1
91	1	53	0	1	0	0	0	0	1	0	1	0	24.67	7.2	7.2	6.7	6.7	7.1	99	168	82	40	111	75.0323	123	0	1	0	0	1	0	0	0	0	0						1	1	16.8	8.2	11.1	7.50323	12.3
92	1	56	0	1	0	0	0	0	1	1	1	0	26.74	6.4	6.8	7.3	6.9	7.6	106	220	127	47	155	85.1545	15	0	1	1	0	1	0	0	0	0	0						1	1	22	12.7	15.5	8.51545	1.5
93	0	56	0	2	1	0	0	2	1	1	0	1	25.95	7.2	6.9	6.3	6	6	96	143	80	48	74	111.983	16	0	0	1	0	1	0	0	0	0	0						0	2	14.3	8	7.4	11.1983	1.6
94	0	55	0	2	0	0	0	2	1	1	0	0	35.18	6.6	6.7	7.1	6.4	6.4	101.333	139	74	40	78	73.1422	59	0	0	1	0	2	0	0	0	0	0						0	2	13.9	7.4	7.8	7.31422	5.9
95	0	52	1	2	1	0	1	0	1	1	0	0	23.66	6.3	5.9	6.2	6	5.9	106	159	84	61	89	68.5755	22	0	1	1	0	2	0	0	0	0	0						0	1	15.9	8.4	8.9	6.85755	2.2
96	0	54	0	3	1	0	0	2	1	1	0	0	20.45	6.7	6.7	6.7	6.4	6.9	93.6667	147	108	38	85	152.893	41	0	0	1	0	1	0	0	0	0	0						0	2	14.7	10.8	8.5	15.2893	4.1
97	0	59	1	2	0	0	0	2	1	1	1	1	31.63	6.7	6.4	6.7	6.7	6.5	107	179	244	40	91	69.0054	28	0	1	1	0	2	1	0	0	0	0						0	2	17.9	24.4	9.1	6.90054	2.8
98	1	34	1	3	1	1	0	0	1	1	1	0	24.34	5.7	6.1	6.2	6.2	7.2	104.333	125	222	30	65	85.5358	70	0	0	1	1	2	0	0	0	0	0						1	1	12.5	22.2	6.5	8.55358	7
99	0	45	1	2	1	1	0	0	1	1	1	0	24.73	7.6	6.9	6.6	6.7	7	86.3333	169	143	35	109	68.08	52	0	0	0	0	3	0	0	0	1	0						0	2	16.9	14.3	10.9	6.808	5.2
100	0	60	0	1	0	0	0	1	1	1	1	0	24.23	6.6	5.8	5.4	5.1	5.1	82.6667	144	145	38	78	96.39	166	0	0	0	0	2	0	0	0	0	0						0	2	14.4	14.5	7.8	9.639	16.6
101	1	54	1	3	1	0	0	0	1	1	1	1	26.36	7.6	6.7	7	6.9	8.3	96.6667	165	215	45	77	132.22	18	0	1	0	0	1	0	0	0	0	0						1	2	16.5	21.5	7.7	13.222	1.8
102	0	41	0	3	1	0	0	0	1	1	1	0	22.96	5	5.4	5.8	5.6	5.6	86.3333	186	139	54	102	79.0462	19	0	1	0	0	3	0	0	0	0	0						0	1	18.6	13.9	10.2	7.90462	1.9
103	0	43	0	3	1	0	0	0	1	0	1	0	24.03	6.3	6.7	6.8	6.4	6.5	98	145	80	52	68	118.15	44	0	1	1	0	2	0	0	0	0	0						0	2	14.5	8	6.8	11.815	4.4
104	0	32	1	2	1	0	0	0	1	1	1	0	28.28	6.6	6.2	6.5	6.4	6.7	111.667	144	128	37	83	118.119	24	0	1	1	0	1	0	0	0	0	0						0	2	14.4	12.8	8.3	11.8119	2.4
105	0	50	1	3	1	0	0	1	1	1	1	0	29.48	6.7	8.2	6.7	7	6.9	88.6667	166	84	56	105	89.3205	26	0	1	0	0	2	0	0	0	0	0						0	1	16.6	8.4	10.5	8.93205	2.6
106	0	57	0	3	1	0	0	#NULL!	0	#NULL!	#NULL!	1	25.54	7.9	6.6	6.4	6.5	6.3	102.667	162	84	44	101	111.581	23	0	1	0	0	1	0	0	0	0	0						0	2	16.2	8.4	10.1	11.1581	2.3
107	0	53	1	2	1	0	0	0	1	1	0	0	24.55	5.5	5.8	6	7.9	5.6	104	134	272	34	50	75.2572	19	0	1	1	0	4	1	0	0	0	0						0	2	13.4	27.2	5	7.52572	1.9
108	0	61	0	1	1	0	0	2	1	1	1	0	30.38	6	6.4	6.1	6.3	6.4	100.667	126	88	45	67	158.388	36	1	1	1	0	1	0	0	0	0	0						0	2	12.6	8.8	6.7	15.8388	3.6
109	0	62	0	0	0	0	0	0	1	0	1	0	30.25	5.9	5.9	5.5	5.1	5.6	94.6667	172	82	55	95	72.681	36	0	0	1	0	1	0	0	0	0	0						0	1	17.2	8.2	9.5	7.2681	3.6
110	0	61	1	2	1	0	0	0	1	1	1	0	24.36	5.7	4.7	5.2	5.2	5.8	91.3333	134	81	34	85	58.7194	27	0	1	1	0	3	0	0	0	0	0						0	2	13.4	8.1	8.5	5.87194	2.7
111	0	64	0	0	0	0	0	0	1	#NULL!	#NULL!	0	21.91	6.6	6.7	6.4	6.4	6.4	109.667	157	145	45	92	71.9871	17	0	1	0	0	1	0	0	0	0	0						0	1	15.7	14.5	9.2	7.19871	1.7
112	0	51	0	2	1	0	0	0	1	#NULL!	#NULL!	0	34.93	6.2	6.3	6.4	6.3	6.3	90.6667	179	108	50	114	116.527	31	0	0	0	0	2	0	0	0	0	0						0	2	17.9	10.8	11.4	11.6527	3.1
113	0	51	0	1	0	0	0	0	1	1	1	0	23.53	5.6	5.8	6	6.1	5.8	112.333	213	969	30	65	58.4528	27	0	1	1	1	1	0	0	0	0	0						0	1	21.3	96.9	6.5	5.84528	2.7
114	0	54	0	1	0	0	0	2	1	0	1	0	25.21	7.2	5.7	5.5	5.9	6.1	124.667	292	1016	46	83	74.7481	37	0	1	1	1	1	1	0	1	0	0						0	1	29.2	101.6	8.3	7.47481	3.7
115	0	49	0	1	0	0	0	0	1	0	0	0	25.67	6	6.7	6.9	6.7	6.6	101.667	196	157	53	123	76.2371	24	0	0	1	0	1	0	0	0	0	0						0	1	19.6	15.7	12.3	7.62371	2.4
116	0	63	0	1	1	0	0	2	1	1	1	1	24.02	6.3	6.1	6.1	5.9	6.1	101.333	150	55	51	79	154.192	17	0	0	0	0	2	1	0	0	0	0						0	2	15	5.5	7.9	15.4192	1.7
117	0	58	1	3	0	0	0	0	1	1	1	1	25.86	6.2	6.5	6	6.1	6	87	134	92	40	75	65.0893	72	0	0	1	0	1	0	0	0	0	0						0	2	13.4	9.2	7.5	6.50893	7.2
118	0	62	1	2	1	0	0	2	1	1	1	1	26.97	6.1	5.7	5.7	5.9	6.2	92	186	137	44	120	68.5476	21	0	1	1	0	1	0	0	0	0	0						0	2	18.6	13.7	12	6.85476	2.1
119	0	60	0	2	0	0	0	2	1	1	1	0	25.8	6.4	6.4	6.6	6	6.3	94.6667	138	147	32	76	56.3664	30	0	1	1	1	1	0	0	0	0	0						0	1	13.8	14.7	7.6	5.63664	3
120	0	46	0	2	1	0	0	0	1	1	1	0	31.11	6.2	10.3	6.6	5.6	5.8	93.6667	134	137	30	70	123.684	91	0	0	1	0	2	0	0	0	0	0						0	2	13.4	13.7	7	12.3684	9.1
121	0	37	0	3	1	0	0	0	1	1	1	0	19.28	7	7	7	7	7	77.6667	189	76	59	111	70.0729	11	0	0	0	0	1	0	0	0	0	0						0	1	18.9	7.6	11.1	7.00729	1.1
122	0	58	1	3	0	0	0	0	1	1	0	1	27.72	5.2	4.9	4.9	5.1	4.8	90.6667	169	232	33	103	62.1852	23	0	0	1	0	1	0	0	0	0	0						0	2	16.9	23.2	10.3	6.21852	2.3
123	0	59	0	0	1	0	0	0	1	0	1	0	26.07	7.5	7.1	7	6.6	7	89.3333	102	47	41	47	162.817	17	0	1	1	0	1	0	0	0	0	0						0	2	10.2	4.7	4.7	16.2817	1.7
124	1	52	1	2	1	0	0	2	1	1	1	1	30.11	7.6	5.9	5.9	7.1	7.7	119.667	178	69	53	117	78.4674	53	0	1	0	0	2	0	0	0	1	0						1	1	17.8	6.9	11.7	7.84674	5.3
125	0	58	0	2	1	0	0	0	1	1	1	0	28.27	7.6	6.7	6	6.2	6	122.667	212	207	37	138	70.6074	53	0	0	1	0	4	0	0	0	0	0						0	2	21.2	20.7	13.8	7.06074	5.3
126	0	36	0	3	0	0	0	0	1	1	1	0	32.42	6.7	6.8	7	7	6.2	95.3333	253	109	45	181	80.7107	141	0	1	1	0	2	0	0	0	0	0						0	1	25.3	10.9	18.1	8.07107	14.1
127	0	51	0	2	0	0	0	0	1	1	1	1	33.32	6.4	6.7	6.2	6.2	6.3	118	149	84	58	74	121.135	61	0	1	1	0	3	0	0	0	0	0						0	2	14.9	8.4	7.4	12.1135	6.1
128	1	55	0	1	0	0	0	0	1	1	0	0	24.38	7.7	8.9	10.1	10.1	9.4	101	180	78	75	81	51.3798	43	0	1	1	0	2	0	0	0	0	0						1	1	18	7.8	8.1	5.13798	4.3
129	0	34	0	2	1	1	1	0	1	1	1	0	18.14	7.5	6.6	6.8	6.4	6.2	82.3333	153	84	53	81	223.483	22	1	0	0	0	3	0	0	0	0	0						0	2	15.3	8.4	8.1	22.3483	2.2
130	0	60	1	1	0	0	0	0	1	1	1	0	21.21	7.2	6.1	6.2	6.5	6.7	77.3333	159	262	57	68	106.23	12	0	0	1	0	1	0	0	0	0	0						0	2	15.9	26.2	6.8	10.623	1.2
131	0	59	0	1	1	0	0	0	1	1	1	1	28.58	7	6.6	6.4	6.6	6.3	74	107	53	34	61	120.28	50	0	1	1	0	1	0	0	0	0	0						0	2	10.7	5.3	6.1	12.028	5
132	0	61	0	3	1	0	0	0	1	1	1	0	26.49	7.7	6.6	6.7	6.4	6.8	89.3333	174	127	49	98	91.9211	37	0	0	0	0	1	0	0	0	0	0						0	1	17.4	12.7	9.8	9.19211	3.7
133	0	62	1	1	0	0	0	0	1	0	0	0	22.77	4.2	4.5	4.5	5.1	5.1	83	201	106	57	115	33.9143	38	0	0	0	0	1	0	0	0	1	0						0	1	20.1	10.6	11.5	3.39143	3.8
134	0	64	0	2	1	0	0	2	1	1	1	0	23.75	6.3	6.1	6	6	6.1	96.3333	245	143	44	149	108.848	57	0	1	1	0	1	0	0	0	0	0						0	2	24.5	14.3	14.9	10.8848	5.7
135	1	56	1	3	0	0	0	1	0	0	0	0	31.39	7.2	8.1	8.1	9.6	9.6	94.6667	186	151	45	116	77.2958	27	0	0	0	0	1	0	0	0	0	0						1	1	18.6	15.1	11.6	7.72958	2.7
136	0	60	1	3	0	0	0	2	1	1	1	0	26.66	7	6.4	6.2	6	6	105.333	193	166	45	104	45.9653	35	0	0	1	0	2	0	0	0	0	0						0	2	19.3	16.6	10.4	4.59653	3.5
137	1	57	0	3	0	0	0	0	1	1	1	1	23.4	7	6.8	6.6	6.8	7.2	102.333	185	44	72	92	94.2883	18	0	1	1	0	2	0	0	0	0	0						1	2	18.5	4.4	9.2	9.42883	1.8
138	0	55	0	3	1	0	0	2	1	0	1	0	23.01	6.6	6.5	6.6	6.4	6.4	95	214	112	69	139	86.5599	22	0	1	1	0	1	0	0	0	0	0						0	1	21.4	11.2	13.9	8.65599	2.2
139	0	56	1	3	0	0	0	0	1	1	1	1	26.81	7.1	6.2	6.3	6.3	6.4	90	151	68	36	105	83.0169	50	0	1	1	0	4	0	0	0	0	0						0	2	15.1	6.8	10.5	8.30169	5
140	1	39	0	3	1	0	0	1	1	#NULL!	#NULL!	1	29.62	7.1	8.1	6.9	8.1	8.2	109	148	116	37	93	95.83	32	0	1	0	1	1	1	0	0	0	0						1	2	14.8	11.6	9.3	9.583	3.2
141	0	57	1	3	1	0	0	2	1	1	1	1	28.89	5.7	5.7	6.1	6.6	6.6	72.3333	156	118	43	100	69.4819	25	0	1	0	0	1	0	0	0	0	0						0	1	15.6	11.8	10	6.94819	2.5
142	0	62	1	2	1	0	1	0	1	1	1	0	25.84	5.8	5.7	5.9	5.6	5.5	107.333	132	81	50	56	84.42	17	0	1	1	0	2	0	0	0	0	0						0	2	13.2	8.1	5.6	8.442	1.7
143	0	53	1	2	1	0	0	0	1	0	1	0	22.02	5.9	6.1	6	6	5.7	108	197	147	64	112	88.2702	14	0	0	1	1	3	0	0	0	0	0						0	1	19.7	14.7	11.2	8.82702	1.4
144	0	33	1	3	1	0	0	0	1	1	1	0	39.15	7.9	7.1	6.2	6	6.6	96.3333	134	332	29	63	81.2522	30	0	1	0	1	1	0	0	0	0	0						0	2	13.4	33.2	6.3	8.12522	3
145	0	59	1	3	0	0	0	2	1	#NULL!	#NULL!	1	25.81	7.1	6.8	6.5	6.1	6.4	90.3333	169	157	48	103	92.2583	29	0	0	1	0	1	0	0	0	0	0						0	2	16.9	15.7	10.3	9.22583	2.9
146	0	48	0	2	0	0	0	0	1	0	0	0	29.67	5.9	6.3	6.1	6.1	6	88.3333	207	349	35	120	88.9383	22	0	1	1	1	3	0	0	1	1	0						0	1	20.7	34.9	12	8.89383	2.2
147	0	60	1	2	0	1	0	2	1	1	1	0	29.55	7.3	8.8	6.4	6.4	6.2	86	150	107	33	96	66.6407	34	0	1	1	0	3	0	0	0	0	0						0	1	15	10.7	9.6	6.66407	3.4
148	0	59	0	2	1	0	0	2	1	1	1	1	41.35	5.8	5.9	6	5.7	5.7	88.6667	162	201	45	84	66.87	55	0	1	1	0	1	0	1	0	0	0						0	2	16.2	20.1	8.4	6.687	5.5
149	0	55	1	3	1	0	0	1	1	1	1	0	29.97	7.4	6.5	6.3	7.1	6.4	97.6667	144	52	50	81	87.2891	30	0	1	1	0	1	0	1	0	0	0						0	2	14.4	5.2	8.1	8.72891	3
150	0	62	1	3	1	0	0	2	1	1	1	0	26.29	7	6.5	6.3	6.6	6.4	88.6667	196	233	44	116	93.5741	31	0	0	1	0	1	0	1	0	0	0						0	2	19.6	23.3	11.6	9.35741	3.1
151	0	59	0	3	1	0	0	1	0	1	1	0	32.83	7.1	6.2	6.7	7.7	6.5	103.667	200	138	54	125	72.37	34	0	1	1	0	1	0	0	0	0	0						0	2	20	13.8	12.5	7.237	3.4
152	0	58	0	1	1	0	0	1	1	1	0	1	27.26	6.5	6.5	6.2	6.4	6.2	95.3333	193	138	33	126	97.057	51	0	1	0	0	2	0	0	0	0	0						0	2	19.3	13.8	12.6	9.7057	5.1
153	0	51	0	1	1	0	0	0	1	0	1	0	29.67	7	6.8	7.2	6.6	6.6	91	183	74	61	117	66.0099	13	0	1	0	0	1	0	0	0	0	0						0	1	18.3	7.4	11.7	6.60099	1.3
154	0	52	1	2	1	0	0	1	1	0	1	0	24.09	6.8	6.1	6	6.3	6.5	112.333	175	57	60	106	31.5888	19	0	1	0	0	2	0	0	0	0	0						0	1	17.5	5.7	10.6	3.15888	1.9
155	0	60	0	0	0	0	0	0	1	0	1	0	23.14	6.9	6.1	6.7	6.5	6.4	86	227	250	60	114	86.8771	27	0	0	0	1	2	0	0	0	0	0						0	1	22.7	25	11.4	8.68771	2.7
156	0	55	0	2	0	0	0	0	1	1	1	1	27.01	6.1	5.8	5.9	5.8	5.9	98.3333	169	86	46	108	111.98	12	0	0	0	0	1	0	0	0	0	0						0	2	16.9	8.6	10.8	11.198	1.2
157	0	51	1	2	0	0	0	0	1	1	1	0	29.18	7.8	6.7	6.3	7	6.8	83.3333	202	111	46	142	88.9622	16	0	0	1	0	1	0	0	0	0	0						0	1	20.2	11.1	14.2	8.89622	1.6
158	1	45	1	2	1	1	1	0	1	1	1	1	28.02	6.5	7.6	7.1	7	8.6	101.333	231	520	31	132	94.89	114	0	1	0	1	2	0	0	0	0	0						1	2	23.1	52	13.2	9.489	11.4
159	0	58	0	0	0	0	0	0	1	0	1	0	25.05	5.2	5.8	6.1	6.1	6	103.667	224	89	70	118	73.4164	20	0	1	1	0	1	0	0	0	0	0						0	1	22.4	8.9	11.8	7.34164	2
160	1	57	1	2	1	0	0	2	1	1	1	0	30.39	7.1	7.1	6.5	6.8	7.1	94.3333	187	293	38	106	86.976	48	0	0	1	1	3	0	0	0	0	0						1	1	18.7	29.3	10.6	8.6976	4.8
161	0	62	1	1	1	1	1	0	1	0	1	0	26.35	7	6.4	6.3	6.3	6.5	98.3333	149	83	40	83	81.4743	33	0	0	0	0	1	0	0	0	0	0						0	1	14.9	8.3	8.3	8.14743	3.3
162	0	58	1	2	1	0	0	2	1	1	1	0	25.78	7.4	6.9	6.8	6.6	6.6	90.6667	209	89	62	123	76.7471	22	0	0	1	1	2	0	0	0	0	0						0	1	20.9	8.9	12.3	7.67471	2.2
163	1	32	1	3	1	0	0	2	1	1	1	1	21.03	7.4	7.1	7.6	7.7	9.6	87.6667	128	30	50	54	103.058	10	2	0	0	0	3	0	0	0	0	0						1	2	12.8	3	5.4	10.3058	1
164	1	48	0	1	1	0	0	0	1	1	1	0	27.06	7.9	9.1	9.8	9.7	8.7	82.6667	230	179	43	155	128.674	13	0	0	1	1	3	0	0	0	0	0						1	1	23	17.9	15.5	12.8674	1.3
165	1	59	0	0	0	0	0	0	1	1	1	0	21.62	6.8	6.6	6.8	6.8	7.1	89.3333	152	103	66	71	102.323	20	0	0	0	0	1	0	0	0	0	0						1	1	15.2	10.3	7.1	10.2323	2
166	1	58	1	2	0	0	0	0	1	#NULL!	#NULL!	0	24.72	7.8	8	8.2	7.2	7.5	86.3333	233	123	33	172	67.094	36	0	0	1	0	2	0	0	0	0	0						1	1	23.3	12.3	17.2	6.7094	3.6
167	0	45	0	2	0	0	0	0	1	1	1	0	21.47	6.2	6.2	6.2	6.7	6.6	82.3333	167	95	57	95	90.4892	13	0	1	0	0	1	0	0	0	0	0						0	1	16.7	9.5	9.5	9.04892	1.3
168	0	42	0	3	1	0	0	2	1	1	1	0	25.08	7.9	5.6	6.2	6	6	97.3333	196	239	33	127	132.189	118	0	1	0	0	1	0	0	0	0	0						0	1	19.6	23.9	12.7	13.2189	11.8
169	0	58	0	2	0	0	0	2	1	1	1	0	23.79	6.6	6.8	6.5	6.6	6.5	98	137	74	51	71	100.39	35	0	0	1	0	3	0	0	0	0	0						0	2	13.7	7.4	7.1	10.039	3.5
170	1	49	0	2	0	0	0	0	1	1	1	0	23.57	7.2	8.1	7.9	8.1	7.1	105.333	155	53	52	88	150.067	62	0	0	0	0	3	0	0	0	0	0						1	2	15.5	5.3	8.8	15.0067	6.2
171	0	53	1	2	0	0	0	0	1	1	1	0	36.89	5.6	5.4	5.5	5.6	5.5	93	166	74	45	111	133.22	27	0	0	1	0	4	0	0	0	0	0						0	2	16.6	7.4	11.1	13.322	2.7
172	0	46	1	3	1	0	1	0	1	0	1	0	22.06	5.2	5.4	5.4	5.4	5.4	88.3333	146	52	48	88	64.1659	24	0	0	0	0	1	0	0	0	0	0						0	1	14.6	5.2	8.8	6.41659	2.4
173	0	59	1	1	1	0	0	0	1	0	0	0	22.06	5.6	5.6	5.5	5.6	5.7	106	180	93	51	115	61.9698	16	0	1	0	0	1	1	1	0	0	0						0	1	18	9.3	11.5	6.19698	1.6
174	0	48	0	2	0	0	0	1	1	1	1	0	30.96	7.6	6.2	5.7	5.9	5.9	84.3333	124	82	44	63	169.725	24	0	0	1	0	3	0	1	0	0	0						0	1	12.4	8.2	6.3	16.9725	2.4
175	0	50	1	3	0	0	0	1	1	1	1	0	24.42	6.8	6.8	6.5	6.7	6.5	102	156	112	51	94	70.8565	39	0	1	1	0	1	0	0	0	0	0						0	1	15.6	11.2	9.4	7.08565	3.9
176	0	59	0	3	1	0	0	1	1	#NULL!	#NULL!	0	23.11	6.5	6.2	6.2	6	6.1	94	160	133	48	95	100.738	23	0	1	1	0	1	0	0	0	0	0						0	2	16	13.3	9.5	10.0738	2.3
177	1	41	1	3	0	0	0	0	1	0	1	0	26.42	5.9	5.8	5.8	6	8.6	106	115	206	31	61	81.9442	76	2	1	1	1	3	0	0	0	0	0						1	1	11.5	20.6	6.1	8.19442	7.6
178	1	52	1	1	0	0	0	0	1	1	1	0	30.18	7.8	6.7	7.1	7.1	14.7	106.667	203	325	40	118	53.0125	36	0	0	1	0	1	0	0	0	0	0						1	1	20.3	32.5	11.8	5.30125	3.6
179	0	52	0	1	1	0	0	0	1	0	1	0	24.46	6.2	6.3	6.8	6.4	6.5	92	175	85	58	91	87.8719	25	0	0	1	0	1	0	0	0	0	0						0	1	17.5	8.5	9.1	8.78719	2.5
180	0	55	0	2	1	0	0	2	1	0	1	1	23.88	7.1	6.3	6.5	6.3	6.5	88.6667	188	125	48	108	68.5073	53	0	0	1	0	1	0	0	0	0	0						0	2	18.8	12.5	10.8	6.85073	5.3
181	0	52	1	2	0	0	0	1	1	1	1	0	28.27	6.9	6.7	6.5	6.5	6.7	96.6667	136	128	38	68	74.7057	54	0	1	1	0	1	0	0	0	0	0						0	2	13.6	12.8	6.8	7.47057	5.4
182	0	60	1	1	0	0	1	0	1	0	1	1	34	6	6.1	6.2	6.5	6.7	97	137	83	61	55	97.2	23	0	1	1	0	1	0	0	0	0	0						0	2	13.7	8.3	5.5	9.72	2.3
183	0	40	0	2	0	0	0	0	1	1	1	1	18.94	6.5	6	6	5.9	5.8	62.3333	155	49	57	75	134.25	12	0	0	0	0	1	0	0	0	0	0						0	2	15.5	4.9	7.5	13.425	1.2
184	0	49	0	2	0	0	0	1	1	0	1	0	23.16	5.3	5.2	5.3	5.1	5.1	95.6667	207	85	41	152	78.1761	31	0	1	1	0	1	0	0	0	0	0						0	1	20.7	8.5	15.2	7.81761	3.1
185	0	59	0	1	1	0	0	2	1	0	1	0	31.63	7.5	6.7	7.2	7.2	6.6	96	255	184	51	173	56.7491	26	0	1	1	0	1	1	0	0	0	0						0	1	25.5	18.4	17.3	5.67491	2.6
186	0	60	0	1	0	0	0	#NULL!	0	#NULL!	#NULL!	0	23.01	5.4	5.1	5.4	5.4	5.4	94	212	52	63	112	64.086	22	0	0	1	0	1	0	0	0	0	0						0	1	21.2	5.2	11.2	6.4086	2.2
187	0	55	0	1	1	0	0	0	1	0	1	0	24.62	7.3	6.7	6.1	6.4	6.1	78.6667	234	136	53	143	86.8771	20	0	1	1	0	1	0	1	0	0	0						0	1	23.4	13.6	14.3	8.68771	2
188	1	64	0	1	0	0	0	0	1	1	1	1	30.26	6.5	7.3	8.8	10.3	11.9	100.667	141	86	39	90	95.1368	132	2	1	1	0	3	1	0	1	0	0						1	2	14.1	8.6	9	9.51368	13.2
189	0	49	0	1	1	0	0	0	1	0	1	0	20.49	5.6	6.8	6.9	6.2	6.2	98	199	117	53	104	75.9251	48	0	0	0	0	1	0	0	0	0	0						0	1	19.9	11.7	10.4	7.59251	4.8
190	0	45	1	2	0	1	1	0	1	1	1	0	25.95	5.7	6	6	5.5	6	102.667	172	110	62	92	112.108	17	0	1	1	0	1	0	0	1	0	0						0	1	17.2	11	9.2	11.2108	1.7
191	0	48	0	2	1	0	1	2	1	1	1	1	27.95	7.7	5.5	5.9	5.9	6.7	98	215	230	81	96	120.495	42	0	1	0	0	2	1	0	0	0	0						0	2	21.5	23	9.6	12.0495	4.2
192	1	46	1	1	1	1	0	0	1	0	0	0	24.2	6.8	7.6	7.6	8.2	8.2	110	256	699	41	92	77.596	40	0	1	1	1	1	0	0	0	0	0						1	1	25.6	69.9	9.2	7.7596	4
193	0	48	1	3	1	1	0	0	1	1	1	0	27.53	6.5	6.5	6.6	6.9	6.9	102.667	130	109	34	76	83.25	19	0	0	1	0	1	0	0	0	0	0						0	2	13	10.9	7.6	8.325	1.9
194	1	59	0	2	1	0	0	2	1	1	1	0	28.97	7.3	7.5	6.8	7.9	7.3	103.333	134	94	54	68	141.869	26	0	1	1	0	2	0	0	0	0	0						1	2	13.4	9.4	6.8	14.1869	2.6
195	0	58	0	1	0	0	0	0	1	1	1	0	25.63	4.6	5.1	5.5	5.4	5.7	80.6667	236	179	53	140	73.4164	16	0	0	0	0	1	0	0	0	0	0						0	1	23.6	17.9	14	7.34164	1.6
196	0	63	1	2	1	0	0	2	1	1	1	0	22.96	7	7	6.5	6.7	6.1	93.3333	203	62	52	139	75.4696	23	0	1	0	0	1	0	0	0	0	0						0	1	20.3	6.2	13.9	7.54696	2.3
197	0	62	0	1	0	0	0	2	1	1	1	0	26.8	7.3	7.2	7.3	7.3	7	88	179	86	45	118	161.21	29	0	1	1	0	1	0	0	0	0	0						0	2	17.9	8.6	11.8	16.121	2.9
198	1	56	0	3	0	0	0	0	1	0	0	0	22.53	7.3	6.4	6.7	6.5	7.1	91.6667	229	156	50	150	107.025	22	0	0	1	0	1	0	0	0	0	0						1	1	22.9	15.6	15	10.7025	2.2
199	0	59	0	2	1	0	0	2	1	0	1	0	23.05	6.5	6.2	6.2	6.3	6.3	112.333	176	100	55	100	73.4164	24	0	1	0	0	1	0	0	0	0	0						0	1	17.6	10	10	7.34164	2.4
200	0	61	0	1	0	0	0	0	1	#NULL!	#NULL!	0	21.33	5.3	5.3	5.6	5.6	5.6	86.6667	234	117	58	140	72.9213	15	0	1	1	0	1	0	0	0	0	0						0	1	23.4	11.7	14	7.29213	1.5
201	0	61	0	2	0	0	0	0	1	0	1	0	21.58	7	7.1	7.1	6.5	6.9	90.6667	129	102	46	65	155.2	28	0	0	1	0	2	0	0	0	0	0						0	1	12.9	10.2	6.5	15.52	2.8
202	0	63	1	3	0	0	0	2	1	1	1	0	25.01	5.6	5.6	5.9	5.9	5.8	90.3333	176	90	48	99	65.9938	29	0	0	0	1	1	0	0	0	0	0						0	1	17.6	9	9.9	6.59938	2.9
203	0	59	0	2	0	0	0	2	1	0	0	0	26.22	6.4	6.2	6.3	6.2	6.9	78	223	77	48	149	105.905	42	0	0	1	0	2	0	0	0	0	0						0	1	22.3	7.7	14.9	10.5905	4.2
204	0	39	1	3	1	0	0	1	1	1	1	0	24.04	6.6	5.9	5.5	5.6	5.6	86.6667	164	386	34	75	81.3069	17	0	0	0	0	3	0	0	0	0	0						0	2	16.4	38.6	7.5	8.13069	1.7
205	0	64	0	2	0	0	0	0	1	0	1	0	27.11	7.4	7.4	6.9	6.9	6.9	97.3333	271	303	51	168	104.183	38	0	1	1	0	2	0	0	0	0	0						0	1	27.1	30.3	16.8	10.4183	3.8
206	0	56	0	2	0	0	0	2	1	1	1	0	23.36	6.7	6.3	6.2	6.3	6.3	89.3333	169	85	69	83	86.5599	28	0	1	1	0	1	0	0	0	0	0						0	1	16.9	8.5	8.3	8.65599	2.8
207	0	34	0	3	1	0	0	2	1	1	1	1	24.15	6.1	6.1	6.1	6.3	6.3	75.3333	227	204	57	152	155.689	54	0	0	1	0	2	0	0	0	0	0						0	1	22.7	20.4	15.2	15.5689	5.4
208	0	62	0	3	0	0	0	2	1	1	1	0	20.17	5.3	5.5	5.5	5.5	5.7	92	135	66	57	67	89.1859	10	0	0	1	0	1	0	1	0	0	0						0	1	13.5	6.6	6.7	8.91859	1
209	0	41	0	3	1	0	0	0	1	1	1	1	25.03	6.7	6.5	6.4	6.6	6.3	81.6667	182	109	35	129	111.779	33	0	0	1	0	2	1	0	0	0	0						0	2	18.2	10.9	12.9	11.1779	3.3
210	1	57	0	1	0	0	0	0	1	1	1	0	24.58	7.5	6.7	6.7	6.9	7.1	90.6667	164	152	45	101	92.3093	21	0	0	1	0	1	0	0	0	0	0						1	1	16.4	15.2	10.1	9.23093	2.1
211	0	64	1	3	1	0	0	2	1	1	1	0	31.25	6	5.6	5.8	6.2	5.6	90	189	78	40	128	81.0555	40	0	1	1	0	2	0	0	0	0	0						0	2	18.9	7.8	12.8	8.10555	4
212	0	61	1	2	1	0	0	0	1	1	1	0	25.94	6.6	6.5	6.5	6.3	6.7	117	201	67	47	136	67.0556	37	0	1	1	0	1	0	0	0	0	0						0	1	20.1	6.7	13.6	6.70556	3.7
213	1	51	0	2	1	0	0	2	1	0	0	0	23.5	6.8	6.8	6.8	9.7	9.7	111.667	175	216	47	103	88.219	22	0	0	0	0	1	0	0	0	0	0						1	1	17.5	21.6	10.3	8.8219	2.2
214	0	51	0	2	1	0	0	0	1	1	0	0	22.47	7.5	6.4	6.6	7	6.7	75	199	163	48	128	99.6245	41	0	0	1	0	2	0	0	0	0	0						0	1	19.9	16.3	12.8	9.96245	4.1
215	0	48	1	3	1	0	1	2	1	0	1	0	27.27	6.4	6.4	6.1	6.1	6.2	106.333	210	143	43	137	69.6825	44	0	0	1	0	3	1	0	0	0	0						0	1	21	14.3	13.7	6.96825	4.4
216	0	46	1	3	1	0	1	1	1	1	0	0	24.74	6.7	6.6	6.5	6.4	6.8	87.6667	217	267	48	121	71.7522	13	0	0	1	1	1	0	0	0	0	0						0	1	21.7	26.7	12.1	7.17522	1.3
217	0	50	0	2	1	0	0	2	1	1	1	0	27.64	6.1	6.2	6	5.8	5.8	75.6667	155	123	49	82	80.23	20	0	1	1	0	1	0	0	0	0	0						0	2	15.5	12.3	8.2	8.023	2
218	0	61	0	3	1	0	0	0	1	1	0	0	23.51	6.5	6.4	6.9	7	6.7	93.6667	137	56	53	64	117.275	17	0	1	1	0	1	1	0	0	0	0						0	2	13.7	5.6	6.4	11.7275	1.7
219	1	56	0	0	0	0	0	0	1	0	0	0	25.07	7.4	7.9	7.7	7.2	7.4	100.333	174	95	43	100	57.3535	20	0	0	0	0	1	0	0	0	0	0						1	1	17.4	9.5	10	5.73535	2
220	0	37	0	2	1	0	0	0	1	0	1	1	42.43	7	6.3	7	6.7	6.5	86.3333	216	171	38	132	142.105	33	0	1	0	1	1	0	0	0	0	0						0	2	21.6	17.1	13.2	14.2105	3.3
221	0	50	0	3	1	0	0	1	1	1	0	0	22.39	6.2	6.4	6.5	6.6	6.3	95	175	276	52	84	88.57	24	0	0	1	0	1	0	1	0	0	0						0	2	17.5	27.6	8.4	8.857	2.4
222	0	59	0	1	1	0	0	2	1	1	1	0	28.36	6.6	6.2	6.3	6.5	6.6	110.333	156	159	42	88	132.045	23	0	1	1	1	1	0	0	0	0	0						0	2	15.6	15.9	8.8	13.2045	2.3
223	0	53	0	2	0	0	0	2	1	1	1	1	27.69	7.2	5.9	5.9	5.8	6.1	83	131	116	35	76	110.95	50	0	1	1	0	3	0	0	0	0	0						0	2	13.1	11.6	7.6	11.095	5
224	0	61	1	2	0	0	1	0	1	1	1	0	26.84	6.8	6.1	6.4	6.2	6.2	102.667	189	121	46	116	91.6361	26	0	1	0	0	1	0	0	0	0	0						0	2	18.9	12.1	11.6	9.16361	2.6
225	0	52	1	2	1	0	1	0	1	0	1	0	24.72	6.9	6.5	6.7	6.1	6.1	89.3333	179	96	43	108	78.4674	15	0	0	0	0	1	0	0	0	0	0						0	1	17.9	9.6	10.8	7.84674	1.5
226	1	59	0	2	1	0	0	2	1	1	1	0	19.76	7.9	7.3	7.5	7.2	7.2	106.333	162	101	49	88	110.803	12	0	1	1	0	3	1	0	0	0	0						1	2	16.2	10.1	8.8	11.0803	1.2
227	0	52	0	1	1	0	0	0	1	0	1	0	24.14	6.4	6.6	6.3	6.7	6.5	108.667	176	175	70	#NULL!	104.98	30	0	1	0	0	1	0	0	0	0	0						0	1	17.6	17.5	#NULL!	10.498	3
228	0	56	1	3	1	1	0	0	1	1	1	0	29.06	6.8	6.9	6.9	7.5	6.9	76.6667	211	161	54	122	77.0186	33	0	0	0	0	2	0	0	0	0	0						0	1	21.1	16.1	12.2	7.70186	3.3
229	0	56	0	2	0	0	0	2	1	1	1	1	23.75	7.3	6.2	6.2	6.2	6.2	87.3333	120	84	49	53	137.075	18	0	0	1	0	3	0	1	0	1	0						0	2	12	8.4	5.3	13.7075	1.8
230	0	61	0	1	0	0	0	0	1	1	1	0	35.53	6.7	5.7	5.6	5.8	5.4	80.3333	102	49	34	58	117.275	173	0	1	1	0	2	1	0	0	0	0						0	2	10.2	4.9	5.8	11.7275	17.3
231	0	37	0	2	1	1	0	2	1	0	1	0	29.83	7.8	8.9	11.5	9.1	6.7	99	213	395	37	122	112.489	21	2	0	0	1	1	0	0	0	0	0						0	1	21.3	39.5	12.2	11.2489	2.1
232	0	43	1	3	0	0	0	0	1	0	1	0	29.07	6.4	6.3	6.3	6.1	6.3	117	152	117	31	107	59.969	122	0	1	0	0	1	0	0	0	0	0						0	1	15.2	11.7	10.7	5.9969	12.2
233	1	57	0	2	1	0	0	0	1	1	1	1	36.83	7.8	7.4	8	7.8	7.6	119	108	104	40	49	133.305	13	2	0	1	0	1	0	0	0	0	0						1	2	10.8	10.4	4.9	13.3305	1.3
234	0	53	0	1	0	0	0	0	1	0	0	0	27.59	6	5.7	6.2	6.2	6.3	86.6667	127	92	40	68	126.126	26	0	0	0	0	1	0	0	0	0	0						0	1	12.7	9.2	6.8	12.6126	2.6
235	0	41	1	2	1	1	0	0	1	0	1	0	32.59	6.1	6	6.3	6.3	6.2	103	167	192	36	100	92.9923	21	0	0	0	0	1	0	0	0	0	0						0	1	16.7	19.2	10	9.29923	2.1
236	0	60	0	0	0	0	0	0	1	0	0	0	28.6	7.5	7.3	7.4	8.2	7	80.3333	235	75	78	140	105.547	23	0	0	1	0	1	0	0	0	0	0						0	1	23.5	7.5	14	10.5547	2.3
237	0	48	0	0	1	0	0	2	1	0	0	0	25.36	6.5	6.8	6.9	6.8	6.3	102.667	196	76	47	121	100.858	18	0	0	1	0	1	0	0	0	0	0						0	2	19.6	7.6	12.1	10.0858	1.8
238	0	61	1	2	0	1	0	1	1	0	1	1	25.51	6.1	6.1	6.1	6.3	5.8	98.6667	158	86	46	94	56.121	24	2	1	0	0	2	0	0	1	0	0						0	1	15.8	8.6	9.4	5.6121	2.4
239	0	61	1	1	0	0	0	2	0	1	1	0	33.52	6.7	6.9	6.9	6.6	6.9	111	191	143	32	118	127.001	24	0	1	0	0	1	0	1	0	0	0						0	2	19.1	14.3	11.8	12.7001	2.4
240	0	54	1	2	1	0	0	1	1	#NULL!	#NULL!	0	29.68	6.2	7.5	6.5	6.2	6.4	131.667	182	295	39	84	66.69	14	0	1	1	0	4	1	0	0	0	0						0	2	18.2	29.5	8.4	6.669	1.4
241	0	64	1	3	1	0	0	2	1	1	1	0	21.91	7.2	7.2	6.8	6.6	6.7	86	201	61	47	144	84.9547	24	0	0	1	0	1	0	0	0	0	0						0	1	20.1	6.1	14.4	8.49547	2.4
242	0	59	0	1	0	0	0	0	1	0	1	0	24.97	7.4	6.9	6.9	6.9	6.9	100	150	87	41	94	50.8384	18	0	0	0	0	3	0	0	0	0	0						0	1	15	8.7	9.4	5.08384	1.8
243	1	46	0	2	1	0	0	1	1	1	0	0	28.81	7.6	6.9	6.9	7.7	7.2	89.3333	127	116	35	74	103.178	47	0	0	1	0	2	0	0	0	0	0						1	2	12.7	11.6	7.4	10.3178	4.7
244	0	46	0	3	1	0	0	1	1	1	1	0	37.36	7.4	6.8	6.4	6	6.4	100.667	168	123	56	91	60.3864	166	0	1	1	0	3	0	0	0	0	0						0	2	16.8	12.3	9.1	6.03864	16.6
245	0	48	0	1	1	0	0	0	1	0	1	0	25.36	7.4	5.7	6.2	6	6.7	107	202	143	47	140	59.1766	42	0	1	1	0	4	0	0	0	1	0						0	1	20.2	14.3	14	5.91766	4.2
246	1	49	1	2	1	0	0	0	1	0	1	0	28.39	6.7	6.7	6.6	6.6	8.8	110.333	186	115	38	119	64.6206	40	0	0	1	1	1	0	0	0	0	0						1	1	18.6	11.5	11.9	6.46206	4
247	0	64	0	0	0	0	0	1	1	1	1	0	25.22	7.2	7.9	9.1	9.1	7	84	159	286	43	77	71.9871	20	0	0	0	0	1	0	0	0	0	0						0	1	15.9	28.6	7.7	7.19871	2
248	1	46	0	3	1	0	0	2	1	1	1	0	23.61	6.1	6.2	6.2	7.3	7.3	82.3333	183	87	59	101	96.4158	20	0	0	1	0	1	0	0	0	0	0						1	2	18.3	8.7	10.1	9.64158	2
249	0	38	0	2	1	0	0	1	1	1	0	0	27.4	6.1	5.9	6.1	6.2	6.5	88.6667	130	85	37	78	70.0729	44	0	0	0	0	2	0	0	0	0	0						0	1	13	8.5	7.8	7.00729	4.4
250	0	57	0	1	1	0	0	1	1	1	1	0	20.4	6.2	6.3	6.3	6.3	6.7	87.3333	208	51	104	91	151.232	31	0	0	0	0	1	0	0	0	0	0						0	1	20.8	5.1	9.1	15.1232	3.1
251	0	51	1	3	1	0	0	0	1	1	1	0	26.94	7.4	6.8	6.9	6.9	6.9	93.3333	177	69	38	123	86.39	36	0	0	1	0	1	0	0	0	0	0						0	1	17.7	6.9	12.3	8.639	3.6
252	0	51	0	1	0	0	0	0	1	1	0	0	34.63	6.2	6.3	6.6	6.4	6.5	88.6667	208	249	48	126	75.6205	40	0	0	0	0	4	0	0	0	0	0						0	1	20.8	24.9	12.6	7.56205	4
253	1	50	0	3	1	0	0	0	1	1	1	1	27.53	7.1	6.4	6.6	7.2	7.4	84	127	87	42	74	196.838	16	2	0	1	0	1	0	0	0	0	0						1	2	12.7	8.7	7.4	19.6838	1.6
254	0	42	0	2	1	0	0	0	1	1	1	0	26.31	7.4	6.1	5.5	5.9	5.8	90.3333	151	55	62	84	92.2155	30	0	0	0	0	1	0	0	0	0	0						0	1	15.1	5.5	8.4	9.22155	3
255	0	52	0	1	1	0	0	1	1	1	1	0	28.67	6.1	6.5	6.5	6	6.1	109.667	198	40	66	114	75.323	25	0	0	0	0	3	0	0	0	0	0						0	1	19.8	4	11.4	7.5323	2.5
256	1	62	0	0	0	0	0	0	1	0	1	0	40.63	6.9	10	10.8	10.8	10.8	118.667	248	157	59	152	50.3291	83	1	1	0	0	3	0	1	1	1	0						1	1	24.8	15.7	15.2	5.03291	8.3
257	1	53	1	2	0	0	0	2	1	1	1	0	30.49	7.7	7.6	7.2	7.2	7.3	107.333	232	281	29	145	83.95	22	0	0	0	1	3	0	0	0	0	0						1	1	23.2	28.1	14.5	8.395	2.2
258	0	62	0	0	0	0	0	0	1	0	1	0	25.89	6	5.9	5.6	5.8	6.3	99	152	75	58	82	72.681	17	0	0	1	0	1	0	0	0	0	0						0	1	15.2	7.5	8.2	7.2681	1.7
259	0	52	0	1	0	0	0	2	1	1	1	0	28.36	5.8	6.5	6.5	6.6	6.5	109.333	170	114	56	101	115.216	18	0	0	0	0	1	0	0	0	0	0						0	1	17	11.4	10.1	11.5216	1.8
260	1	62	0	2	1	0	0	0	1	1	1	0	25.75	7.3	7.3	7.2	7.2	7.6	97.6667	140	102	52	77	91.6206	11	0	0	1	0	1	0	0	0	0	0						1	1	14	10.2	7.7	9.16206	1.1
261	0	58	0	3	1	0	0	0	1	0	1	0	21.53	6.1	5.9	6	6.3	6.2	92.6667	237	400	45	144	92.8593	8	0	0	1	1	1	0	0	0	0	0						0	1	23.7	40	14.4	9.28593	0.8
262	0	56	0	3	0	0	0	2	1	1	1	1	25.64	7.1	7.1	6.7	7.2	6.7	80.6667	149	63	45	82	73.14	20	0	0	0	0	1	0	0	0	0	0						0	2	14.9	6.3	8.2	7.314	2
263	0	56	0	1	0	0	0	2	1	1	1	0	24.39	6.3	5.7	5.7	5.9	6	94	227	151	65	139	64.7685	13	0	0	1	0	4	0	0	0	0	0						0	1	22.7	15.1	13.9	6.47685	1.3
264	0	54	0	1	1	0	0	2	1	1	1	0	25.01	6.8	6.3	6.3	6.5	6.5	74.3333	157	84	54	81	123.623	18	0	0	1	0	2	0	0	0	0	0						0	2	15.7	8.4	8.1	12.3623	1.8
265	0	61	1	3	1	0	0	0	1	1	1	0	29	5.5	5.7	5.6	5.4	5.7	76.6667	154	289	37	69	78.6831	19	0	1	1	1	2	1	1	0	0	0						0	2	15.4	28.9	6.9	7.86831	1.9
266	0	50	0	2	1	0	0	1	1	1	1	0	23.94	7.4	7.4	6.2	6.2	6.4	88.3333	172	160	49	109	109.499	12	0	0	0	0	1	0	0	0	0	0						0	1	17.2	16	10.9	10.9499	1.2
267	0	63	1	3	1	0	0	1	1	0	0	0	23.92	7.4	7	7.1	6.3	6.5	115	240	98	66	157	85.2268	21	0	1	1	0	1	0	0	0	0	0						0	1	24	9.8	15.7	8.52268	2.1
268	1	57	0	1	1	0	0	0	1	1	1	0	27.41	7.9	7.1	8.1	8.1	8.2	95	214	214	48	114	86.2494	25	0	1	1	0	1	0	0	0	0	0						1	1	21.4	21.4	11.4	8.62494	2.5
269	0	51	0	2	1	0	0	1	1	1	1	0	23.37	5.6	5.6	5.5	5.4	5.8	101.333	205	109	75	118	109.062	93	0	0	0	0	1	0	0	0	0	0						0	1	20.5	10.9	11.8	10.9062	9.3
270	1	43	1	3	1	0	0	0	1	1	1	0	32.72	7	8.2	8.5	9.1	10.2	108.667	205	254	55	115	47.1914	64	2	1	1	1	2	1	1	0	1	0						1	1	20.5	25.4	11.5	4.71914	6.4
271	0	61	0	3	1	0	0	2	1	1	1	0	22.69	6.1	6.1	6.3	6.3	5.8	75.3333	184	71	79	77	82.349	26	0	0	0	0	2	0	0	0	0	0						0	2	18.4	7.1	7.7	8.2349	2.6
272	0	58	0	1	1	0	0	0	1	#NULL!	#NULL!	0	29.78	6.6	6.5	6.5	6.3	6.3	85	200	239	52	104	56.7491	15	0	1	0	0	1	0	1	0	0	0						0	1	20	23.9	10.4	5.67491	1.5
273	0	60	0	2	1	0	0	1	1	0	1	0	21.03	7.1	5.7	5.9	5.8	5.6	90.6667	227	109	76	118	77.628	17	0	0	0	0	2	0	0	0	0	0						0	2	22.7	10.9	11.8	7.7628	1.7
274	1	46	0	1	1	0	0	2	1	1	1	1	30.18	7.8	8	8.5	8.5	9.2	94.6667	192	52	91	77	89.6939	91	0	0	0	0	3	0	0	1	0	0						1	1	19.2	5.2	7.7	8.96939	9.1
275	1	53	0	3	1	0	0	2	1	1	1	0	28.88	7.8	7.6	7.9	7.9	7.9	111.667	209	90	58	134	79.6077	33	0	1	1	0	3	0	0	0	0	0						1	2	20.9	9	13.4	7.96077	3.3
276	1	49	0	1	0	0	0	0	1	1	1	0	23.48	7.9	7.9	6.3	6.3	7.7	93.6667	206	52	72	129	76.2371	28	0	0	0	0	1	0	0	0	0	0						1	1	20.6	5.2	12.9	7.62371	2.8
277	0	31	1	3	1	0	0	2	1	1	1	1	31.52	6.6	5.6	5.4	5.9	5.6	88	187	95	43	128	92.4695	22	0	0	1	0	1	0	0	0	0	0						0	2	18.7	9.5	12.8	9.24695	2.2
278	0	49	0	3	0	0	0	1	1	1	1	0	27.29	7.5	6.2	6.5	6.9	6.7	80	164	55	52	86	86.0935	16	0	0	1	0	1	0	0	0	0	0						0	2	16.4	5.5	8.6	8.60935	1.6
279	0	43	0	3	1	0	0	0	1	#NULL!	#NULL!	0	23.51	5.9	5.7	5.8	5.8	5.4	86.3333	226	40	64	143	54.2102	9	0	0	1	0	1	0	0	0	0	0						0	1	22.6	4	14.3	5.42102	0.9
280	1	46	0	3	1	0	0	0	1	1	1	0	32.55	7.2	8	7	7.8	7.4	98.3333	206	148	54	143	118.994	29	0	1	1	0	1	0	0	0	0	0						1	1	20.6	14.8	14.3	11.8994	2.9
281	0	53	0	2	1	0	0	2	1	1	1	1	18.2	6.7	5.6	6	5.9	5.7	133.333	229	125	60	157	34.8436	21	0	1	1	0	1	0	0	0	0	0						0	1	22.9	12.5	15.7	3.48436	2.1
282	0	63	0	2	0	0	0	0	1	1	1	1	21.58	6.8	5.3	5.9	5.5	5.6	72	123	70	51	52	148.3	23	0	1	1	0	2	0	0	0	0	0						0	2	12.3	7	5.2	14.83	2.3
283	0	46	1	2	1	0	0	0	1	1	1	0	23.51	5.7	5.4	5.9	6.4	6.2	82.3333	186	149	54	92	72.0661	14	0	0	0	0	1	0	0	0	0	0						0	1	18.6	14.9	9.2	7.20661	1.4
284	0	53	0	2	1	0	0	0	1	1	1	0	21.87	3.7	3.5	3.5	3.5	3.5	82.3333	109	122	37	47	145.749	21	0	1	0	0	1	0	1	0	0	0						0	2	10.9	12.2	4.7	14.5749	2.1
285	0	46	0	3	0	0	0	2	1	1	0	0	23.95	7.1	6	6.2	6.1	6.5	96.3333	175	124	36	117	67.7086	14	0	1	1	0	2	0	0	0	0	0						0	1	17.5	12.4	11.7	6.77086	1.4
286	0	63	0	1	0	0	0	2	1	1	1	0	27.95	7.7	7.5	7.4	7.4	5.9	112.667	178	167	41	114	104.514	31	0	1	0	0	1	0	0	0	0	0						0	1	17.8	16.7	11.4	10.4514	3.1
287	0	41	0	2	1	0	0	1	1	1	1	0	25	7.3	5.1	5.1	5.7	5.7	115.667	208	239	39	131	132.833	109	0	1	0	1	1	0	0	0	0	0						0	1	20.8	23.9	13.1	13.2833	10.9
288	0	59	0	1	0	0	0	0	1	1	1	1	27.19	6.9	5.7	6.6	6.4	6	110	198	268	38	107	61.7063	48	0	1	0	0	2	0	0	0	0	0						0	1	19.8	26.8	10.7	6.17063	4.8
289	0	55	1	2	1	1	0	0	1	1	1	1	26.55	5.9	5.7	5.7	5.6	5.5	75.6667	162	105	29	111	136.737	27	0	0	0	0	1	0	0	0	0	0						0	1	16.2	10.5	11.1	13.6737	2.7
290	0	53	0	1	0	0	0	0	1	0	1	0	22.4	6.4	7	6.5	6.7	6.6	89.3333	213	88	64	145	126.126	13	0	0	1	0	1	0	0	0	0	0						0	1	21.3	8.8	14.5	12.6126	1.3
291	0	47	0	2	1	0	0	2	1	1	1	0	24.78	6.4	6	6	6	6	96.6667	175	88	51	112	76.8848	17	0	0	1	0	2	0	0	0	0	0						0	1	17.5	8.8	11.2	7.68848	1.7
292	1	59	1	3	1	0	0	2	1	1	1	0	28.33	6.6	6.8	6.9	6.7	7.2	103.667	110	58	28	71	89.5093	16	0	1	1	0	2	0	0	0	0	0						1	2	11	5.8	7.1	8.95093	1.6
293	0	55	1	2	1	0	0	2	1	1	0	0	26.48	6.1	6	5.6	5.5	5.8	104.333	131	189	29	68	68.0686	38	0	0	0	0	2	0	0	0	0	0						0	2	13.1	18.9	6.8	6.80686	3.8
294	0	52	1	2	1	0	0	0	1	1	1	0	29.8	7.2	6.2	6.4	5.9	5.9	93.6667	187	137	60	121	78.4674	27	0	0	1	0	1	0	0	0	0	0						0	1	18.7	13.7	12.1	7.84674	2.7
295	1	40	0	2	0	0	0	0	1	0	0	0	24.81	7.1	7.3	7	6.8	7.2	71.6667	103	57	42	49	159.344	22	0	1	0	0	3	0	0	0	0	0						1	1	10.3	5.7	4.9	15.9344	2.2
296	0	56	0	2	1	0	0	0	1	1	1	1	19.78	7.5	6.9	6.7	7.1	6.9	90.6667	132	103	44	70	71.11	57	0	0	1	0	1	0	0	0	0	0						0	2	13.2	10.3	7	7.111	5.7
297	1	51	1	2	1	0	0	0	1	0	0	0	33.2	6.9	9.1	9.1	7.5	8.8	131	246	299	38	148.2	78.7773	12	0	0	1	1	2	0	0	0	0	0						1	1	24.6	29.9	14.82	7.87773	1.2
298	0	57	1	3	0	0	0	1	1	1	1	0	26.04	6.8	5.7	5.6	5.7	6.1	106	123	85	31	67	94.18	26	0	1	1	0	2	0	0	0	0	0						0	2	12.3	8.5	6.7	9.418	2.6
299	0	41	0	2	0	0	0	0	1	1	0	0	26.71	5.5	6	6	6	6	104.333	169	59	61	93	113.97	13	0	1	0	1	3	0	1	0	0	0						0	1	16.9	5.9	9.3	11.397	1.3
300	0	60	0	1	0	0	0	0	1	#NULL!	#NULL!	0	28.97	6.8	6.2	6.3	6.4	6.2	78	143	131	46	76	108.193	37	0	0	1	0	2	0	0	0	0	0						0	2	14.3	13.1	7.6	10.8193	3.7
301	0	52	0	2	0	0	0	0	1	1	1	0	30.86	7	6.5	6.5	6.2	6.4	92.3333	185	304	50	87	85.06	32	0	0	1	0	1	0	0	0	0	0						0	2	18.5	30.4	8.7	8.506	3.2
302	0	56	0	1	0	0	0	0	1	0	1	0	33.03	6.4	6.8	6.5	6.5	6.7	95	205	118	56	131	116.78	37	0	1	1	0	1	0	0	0	0	0						0	2	20.5	11.8	13.1	11.678	3.7
303	1	59	0	1	0	0	0	2	1	0	1	0	22.92	7.9	7	7	6.3	7.1	95.3333	197	213	57	116	90.0884	95	0	1	0	0	1	0	0	0	0	0						1	1	19.7	21.3	11.6	9.00884	9.5
304	0	57	1	2	0	0	0	0	0	1	1	0	24.8	6.1	6.1	6.6	6.5	6.5	83	160	119	39	96	87.7943	37	0	0	1	0	1	0	0	0	0	0						0	2	16	11.9	9.6	8.77943	3.7
305	0	54	0	3	0	0	0	1	1	1	1	0	27.9	7.5	6.5	6.6	6.6	6.8	86.3333	171	110	52	98	115.18	23	0	0	1	0	3	0	0	0	0	0						0	2	17.1	11	9.8	11.518	2.3
306	0	54	1	3	0	1	0	0	1	0	1	0	24.11	6.1	6.1	6.1	5.8	5.8	101.333	148	227	50	71	69.7582	20	0	0	1	0	1	0	0	0	0	0						0	1	14.8	22.7	7.1	6.97582	2
307	1	52	0	0	1	0	0	0	1	0	1	0	25.55	7.3	8	7.4	6.6	7.3	87.3333	154	116	46	88	75.323	21	0	1	0	0	1	1	0	0	0	0						1	1	15.4	11.6	8.8	7.5323	2.1
308	1	48	1	2	1	0	0	0	1	0	1	0	22.27	6.5	6	6.2	6.4	7.1	101.333	173	56	53	111	85.7659	50	0	0	0	0	1	0	0	0	0	0						1	1	17.3	5.6	11.1	8.57659	5
309	0	62	1	2	1	0	0	0	1	1	1	0	29.4	7.9	6.8	6.5	7	7	92.3333	118	53	35	69	80.33	33	0	1	1	0	2	0	0	0	0	0						0	2	11.8	5.3	6.9	8.033	3.3
310	0	43	0	2	1	0	0	0	1	1	1	0	25.07	5.2	5.7	6	6	6.1	87	165	108	43	96	68.3364	23	0	0	0	0	1	0	0	0	0	0						0	1	16.5	10.8	9.6	6.83364	2.3
311	1	44	1	1	1	0	0	1	1	0	1	0	29.58	7	7.4	8.2	8.2	7.5	104	185	80	43	122	81.174	53	0	0	0	1	1	0	0	0	0	0						1	1	18.5	8	12.2	8.1174	5.3
312	1	63	0	1	0	0	0	0	1	0	1	0	20.5	6.4	6.1	6.4	6.2	7.2	98.6667	223	175	59	138	72.4453	16	0	1	0	0	1	0	0	0	0	0						1	1	22.3	17.5	13.8	7.24453	1.6
313	0	55	1	1	1	0	0	0	1	1	1	0	27.68	6.7	6.8	6.8	7	6.5	99.3333	194	101	52	128	87.609	25	0	1	1	0	1	0	0	0	0	0						0	1	19.4	10.1	12.8	8.7609	2.5
314	1	54	1	1	0	0	0	2	1	0	1	1	28.82	5.8	5.5	5.4	6.8	8.7	104.333	171	127	40	114	100.364	49	2	0	1	0	3	0	0	0	0	0						1	1	17.1	12.7	11.4	10.0364	4.9
315	0	58	1	1	0	0	0	2	1	0	1	0	26.93	6.2	6.5	6	6.4	6.5	98.6667	201	367	42	111	51.8708	24	0	0	0	0	2	0	0	0	0	0						0	1	20.1	36.7	11.1	5.18708	2.4
316	0	57	0	1	1	0	0	0	1	1	0	0	26.8	6.3	6.1	6.6	6.7	6.6	101.333	119	91	42	63	196.387	20	0	0	1	0	2	0	0	0	0	0						0	2	11.9	9.1	6.3	19.6387	2
317	0	61	0	2	1	0	0	2	1	#NULL!	#NULL!	0	20.78	6.1	5.6	5.7	5.8	5.5	94.6667	203	74	63	113	97.5363	14	0	0	1	0	2	1	0	0	0	0						0	2	20.3	7.4	11.3	9.75363	1.4
318	1	61	0	1	0	0	0	0	1	0	1	0	26.91	6.4	8.1	8.1	7.2	7.4	91.3333	196	156	57	104	30.555	19	0	1	1	0	1	0	0	0	0	0						1	1	19.6	15.6	10.4	3.0555	1.9
319	0	51	1	2	0	0	0	1	1	1	1	1	31.22	6.7	6.6	6.7	6.7	6.7	96.6667	173	128	32	107	115.09	14	0	0	0	0	1	0	0	0	0	0						0	2	17.3	12.8	10.7	11.509	1.4
320	0	57	1	1	1	1	1	0	1	1	1	0	31.21	6.2	6	6	5.6	5.7	103	186	95	34	128	75.87	23	0	0	1	1	2	0	0	0	0	0						0	2	18.6	9.5	12.8	7.587	2.3
321	0	53	0	1	0	0	0	2	1	0	1	0	24.06	5.8	5.8	5.9	6	6.2	100.333	223	146	47	146	126.126	16	0	1	1	0	3	0	0	0	0	0						0	1	22.3	14.6	14.6	12.6126	1.6
322	0	58	0	1	0	0	0	0	1	0	1	0	28.26	5.9	6	6.4	6.4	6.4	78.3333	155	86	46	83	102.679	15	0	1	0	0	2	0	0	0	0	0						0	1	15.5	8.6	8.3	10.2679	1.5
323	1	35	0	2	1	0	0	2	1	1	1	1	35.02	7.1	6.5	6.1	6	7.3	93.3333	102	79	50	31	133.427	14	0	1	1	0	1	0	1	0	0	0						1	2	10.2	7.9	3.1	13.3427	1.4
324	0	60	0	1	0	0	0	0	1	0	1	0	26.84	7.1	6.5	6.5	6.4	6.3	105	267	151	58	163	123.008	68	0	0	1	0	1	0	0	0	0	0						0	1	26.7	15.1	16.3	12.3008	6.8
325	0	63	1	3	1	0	0	2	1	1	1	0	24.13	6.5	6.5	6.5	7	6.5	105.333	151	107	49	82	75.2287	33	0	1	1	0	3	0	0	0	0	0						0	1	15.1	10.7	8.2	7.52287	3.3
326	0	58	0	1	0	0	0	2	1	1	1	0	31.12	6.2	6.6	6.2	6.5	5.9	94.3333	201	224	39	117	153.689	90	0	1	1	1	1	0	0	0	0	0						0	2	20.1	22.4	11.7	15.3689	9
327	0	38	1	3	1	1	1	1	1	1	0	1	23.66	7.6	6.2	6.5	6.3	6.3	103	192	96	61	111	95.66	30	0	1	1	0	1	0	0	0	0	0						0	2	19.2	9.6	11.1	9.566	3
328	0	60	0	2	0	0	0	0	1	1	1	0	22.93	6.2	6.2	6.2	6.2	6.2	90.6667	169	184	46	85	96.39	33	0	0	1	0	1	0	0	0	0	0						0	2	16.9	18.4	8.5	9.639	3.3
329	0	64	0	2	1	0	0	0	1	1	1	0	24.86	7.7	6.5	6.3	6.5	6.7	123	156	120	51	79	87.1108	20	0	1	1	0	4	1	0	0	0	0						0	2	15.6	12	7.9	8.71108	2
330	0	52	0	3	1	0	0	0	1	1	1	0	22.59	6.3	6.3	6.2	6.2	6.4	109.667	210	202	39	136	74.54	56	0	0	0	1	2	0	0	0	0	0						0	2	21	20.2	13.6	7.454	5.6
331	0	57	0	3	1	0	0	0	1	1	1	0	23.23	6.6	6.3	6.7	6.4	6.6	90	177	71	75	97	201.304	20	0	0	1	0	1	0	0	0	0	0						0	1	17.7	7.1	9.7	20.1304	2
332	0	57	1	1	1	0	0	2	1	0	0	0	28.02	5.5	6	5.8	6.3	5.8	94	184	102	61	109	77.0186	28	0	1	0	0	1	0	0	0	0	0						0	1	18.4	10.2	10.9	7.70186	2.8
333	0	61	1	2	1	0	0	2	1	1	1	1	25.45	6.8	6.6	6.8	6.7	6.7	87	163	430	34	41	77.7573	45	0	0	1	1	3	0	0	1	0	0						0	2	16.3	43	4.1	7.77573	4.5
334	0	59	0	1	0	0	0	0	1	1	1	0	24.26	7.2	6.6	6.1	6.1	6.2	97.3333	213	134	56	135	73.4164	38	0	1	1	0	2	0	1	0	0	0						0	1	21.3	13.4	13.5	7.34164	3.8
335	0	60	0	2	0	0	0	2	1	1	1	1	23.87	5.7	6.8	7.3	7	6.6	100	180	76	63	101	117.275	32	0	1	1	0	1	0	0	0	0	0						0	1	18	7.6	10.1	11.7275	3.2
336	1	54	0	3	0	0	0	0	1	0	1	0	23.24	7.2	7.2	8.5	8.5	7.4	106.667	200	61	64	119	86.8771	23	0	1	0	0	2	0	1	0	0	0						1	1	20	6.1	11.9	8.68771	2.3
337	1	53	0	2	0	0	0	0	1	1	1	1	26.52	6.1	6.3	6.4	6.4	11.4	101	199	144	46	135	80.5277	28	0	1	1	0	1	0	0	0	0	0						1	2	19.9	14.4	13.5	8.05277	2.8
338	0	43	1	2	0	0	0	0	1	1	1	0	27.85	5.4	5.5	5.9	5.6	6.1	93	166	208	27	105	59.969	27	0	1	0	0	3	0	0	0	0	0						0	1	16.6	20.8	10.5	5.9969	2.7
339	0	61	1	3	0	0	0	0	1	1	1	0	27.24	6.4	6.3	5.9	6	6.4	93.6667	143	75	47	80	74.4987	38	0	1	1	0	2	0	1	0	0	0						0	2	14.3	7.5	8	7.44987	3.8
340	1	39	1	2	0	0	0	0	1	1	1	0	33.51	6.8	5.8	5.8	7.6	7.6	90.6667	198	96	54	110	107.618	29	0	0	0	0	2	0	0	0	0	0						1	1	19.8	9.6	11	10.7618	2.9
341	0	53	1	2	1	0	0	2	1	1	1	1	24.41	6.5	5.6	8.3	6.3	5.5	73	199	133	50	104	117.52	47	0	0	1	0	2	0	0	0	0	0						0	2	19.9	13.3	10.4	11.752	4.7
342	0	39	1	2	1	1	0	0	1	0	1	0	28.67	6	5.8	5.8	5.8	5.6	94	214	146	61	118	72.6394	26	0	0	0	0	1	0	0	0	0	0						0	1	21.4	14.6	11.8	7.26394	2.6
343	0	63	1	1	0	0	0	0	1	0	1	0	29.02	5.9	6.1	5.9	5.9	5.9	120	180	101	57	200	75.2287	13	0	1	0	0	1	1	1	0	0	0						0	1	18	10.1	20	7.52287	1.3
344	0	53	0	2	0	0	0	1	0	1	1	0	18.78	7	6.4	6.6	6.7	6.5	76.3333	174	81	42	102	104.179	24	0	0	1	0	1	0	0	0	0	0						0	1	17.4	8.1	10.2	10.4179	2.4
345	0	55	0	2	0	0	0	2	1	1	1	1	17.49	7.3	5.8	5.7	5.9	6.3	88.3333	250	51	61	159	101.83	17	0	1	1	0	1	0	0	0	0	0						0	2	25	5.1	15.9	10.183	1.7
346	0	58	1	2	1	0	0	0	1	0	1	0	27.8	5.7	5.8	5.8	5.7	5.7	95.3333	212	166	34	147	82.5712	38	0	1	1	0	2	0	0	0	0	0						0	1	21.2	16.6	14.7	8.25712	3.8
347	0	58	1	2	0	0	0	1	1	0	1	0	27.44	7.4	6.4	6.4	5.9	6.2	101.333	186	89	86	94	102.23	46	0	0	0	0	1	0	0	0	0	0						0	1	18.6	8.9	9.4	10.223	4.6
348	0	57	0	2	1	0	0	1	0	1	1	1	27.71	7	6.5	6.3	6.1	6.4	80.6667	135	115	53	61	121.54	16	0	1	1	0	1	0	1	0	0	0						0	2	13.5	11.5	6.1	12.154	1.6
349	0	62	0	0	0	0	0	1	1	#NULL!	#NULL!	0	32.57	6.6	6.3	5.9	5.9	6.3	85	207	99	44	154	61.8551	63	0	0	1	0	1	1	0	1	0	0						0	1	20.7	9.9	15.4	6.18551	6.3
350	1	55	0	2	1	0	0	0	1	1	1	0	29.46	6.6	6.7	6.7	7	7.2	89.6667	185	174	56	105	181.319	55	0	1	1	0	1	0	0	0	0	0						1	2	18.5	17.4	10.5	18.1319	5.5
351	0	60	1	3	0	0	0	1	1	1	1	0	29.87	6	6.8	5.7	6.3	6.6	107.667	254	354	38	170	110.98	27	0	1	1	0	2	0	0	0	0	0						0	1	25.4	35.4	17	11.098	2.7
352	0	43	0	3	1	0	0	0	1	1	1	0	22.51	7.4	6.7	7	7.2	6.5	92	178	62	54	108	77.9211	29	0	0	0	0	1	0	0	0	0	0						0	1	17.8	6.2	10.8	7.79211	2.9
353	0	52	1	2	1	0	0	2	1	1	1	1	21.73	6	5.9	5.9	5.9	6	99	130	46	54	57	89.76	19	0	0	1	0	1	0	0	0	0	0						0	2	13	4.6	5.7	8.976	1.9
354	1	50	0	3	0	0	0	1	1	1	1	1	36.09	7.7	7.4	7.4	7.7	7.7	93	273	277	57	167	121.616	50	0	1	1	0	1	0	0	0	0	0						1	2	27.3	27.7	16.7	12.1616	5
355	0	61	1	1	1	0	0	1	1	0	0	1	27.12	5.4	6.2	5.7	5.3	5.3	87.3333	176	115	54	98	97.95	25	0	0	1	0	1	0	0	0	0	0						0	2	17.6	11.5	9.8	9.795	2.5
356	1	57	0	1	0	0	0	0	1	0	0	0	24.02	7.7	6.9	6.6	7.3	7.3	85	214	87	53	124	73.6716	22	0	0	1	1	1	0	0	0	0	0						1	1	21.4	8.7	12.4	7.36716	2.2
357	0	48	0	1	1	0	0	0	1	1	1	0	25.97	6.7	6	6.2	6.5	6.2	100.333	148	147	38	77	97.2855	43	0	1	1	0	2	0	0	0	0	0						0	2	14.8	14.7	7.7	9.72855	4.3
358	1	64	1	1	0	1	0	0	1	1	1	0	24.88	6.9	6.9	7.3	6.9	8.1	82.6667	189	143	42	106	75.2287	21	0	0	0	0	2	0	0	1	0	0						1	1	18.9	14.3	10.6	7.52287	2.1
359	0	47	0	1	1	0	0	0	1	1	1	0	26.9	5.7	6.4	7.1	7.1	5.7	115	234	307	54	118	109.255	16	0	1	1	0	4	0	0	0	0	0						0	2	23.4	30.7	11.8	10.9255	1.6
360	1	49	0	2	1	0	0	0	0	0	1	0	46.99	7.3	7	7	6.5	7.1	93.6667	202	336	37	101	105.819	102	0	1	0	1	3	1	1	0	1	0						1	1	20.2	33.6	10.1	10.5819	10.2
361	0	50	0	2	1	0	0	1	1	1	1	1	28.11	6.5	6.2	6	6	5.8	101.333	136	55	51	72	175.649	17	0	0	1	0	1	0	0	0	0	0						0	2	13.6	5.5	7.2	17.5649	1.7
362	0	51	0	2	0	0	0	1	1	1	1	0	31.45	7	7	6.2	6.5	6	85.6667	194	145	42	134	127.109	26	0	0	1	0	1	0	0	0	0	0						0	1	19.4	14.5	13.4	12.7109	2.6
363	0	60	1	1	1	1	0	0	1	0	0	0	25.59	5	5.2	5.7	5.9	6	117	149	140	49	67	86.0751	28	2	1	0	0	1	0	0	0	0	0						0	1	14.9	14	6.7	8.60751	2.8
364	0	53	1	1	0	0	0	0	1	1	1	0	24.03	5.7	6.4	6.3	6.3	6.6	102.333	155	191	41	87	87.9359	44	0	0	1	0	3	0	0	0	1	0						0	1	15.5	19.1	8.7	8.79359	4.4
365	0	57	0	0	0	0	0	0	1	0	1	0	33.98	7.5	6.9	8.2	8.2	6.8	132	197	135	45	136	106.644	34	0	1	1	0	1	0	0	0	0	0						0	1	19.7	13.5	13.6	10.6644	3.4
366	0	62	1	2	0	1	0	2	1	1	1	0	25.3	6.2	5.9	5.9	6.1	6.1	94.6667	169	93	41	106	95.5044	62	0	1	1	0	2	0	0	0	0	0						0	1	16.9	9.3	10.6	9.55044	6.2
367	0	53	1	2	1	0	0	1	1	1	1	1	25.71	5.8	6.1	6	5.8	6	109	134	64	50	69	96.9157	71	0	0	1	0	1	0	0	0	0	0						0	2	13.4	6.4	6.9	9.69157	7.1
368	0	58	1	2	0	1	0	0	1	1	1	1	26.36	5.9	5.7	5.7	6.5	5.7	75.6667	115	128	27	59	40.3609	47	2	1	1	1	4	1	0	0	0	0						0	2	11.5	12.8	5.9	4.03609	4.7
369	0	64	1	1	0	0	0	2	1	1	1	0	24.68	6.3	6.5	7	6.2	6.8	93.3333	205	77	55	131	91.2948	29	0	1	1	0	3	1	0	0	0	0						0	1	20.5	7.7	13.1	9.12948	2.9
370	0	53	1	2	1	0	0	2	1	1	1	0	21.05	6	5.7	5.6	6.1	5.7	93	151	93	69	70	84.0778	38	0	0	0	0	2	0	0	0	0	0						0	1	15.1	9.3	7	8.40778	3.8
371	1	57	1	1	0	0	0	0	1	1	1	0	30.48	7.7	6.3	8.3	7.8	7.8	107.333	172	99	39	111	74.3336	21	0	1	0	0	1	1	1	0	0	0						1	1	17.2	9.9	11.1	7.43336	2.1
372	0	58	0	1	1	0	0	2	1	1	1	0	27.53	7.2	6.2	6.3	6.3	6.6	89.3333	151	112	53	85	106.271	23	0	0	1	0	3	0	0	0	0	0						0	1	15.1	11.2	8.5	10.6271	2.3
373	0	56	1	2	0	1	0	0	1	1	1	1	21.72	7.3	8.2	7.1	7.1	6.8	88.3333	138	91	38	82	65.5466	38	0	1	1	0	3	1	1	0	0	0						0	2	13.8	9.1	8.2	6.55466	3.8
374	0	35	0	2	1	0	0	0	1	0	1	0	32.23	6.3	6.5	6.8	6.7	6.6	103.667	189	235	44	114	81.6263	34	0	0	0	1	2	0	0	0	1	0						0	1	18.9	23.5	11.4	8.16263	3.4
375	0	43	0	2	0	0	0	0	1	0	1	0	32.53	6.5	6.6	6.3	6.6	6.1	96.6667	190	107	36	124	91.3282	24	0	0	1	0	1	0	0	0	0	0						0	1	19	10.7	12.4	9.13282	2.4
376	0	55	1	2	0	0	0	0	1	1	1	1	31.85	5.8	5.4	6.3	6	6.1	99	200	67	41	148	103.34	26	0	0	1	0	4	0	0	0	0	0						0	2	20	6.7	14.8	10.334	2.6
377	0	57	0	2	0	0	0	2	1	1	0	0	20.45	6.3	5.6	5.6	5.5	5.4	121	156	38	54	88	137.748	17	0	0	0	0	3	1	0	0	0	0						0	2	15.6	3.8	8.8	13.7748	1.7
378	0	42	1	3	1	0	0	2	1	0	1	0	24.52	6.7	6.5	6.5	6.7	6.7	84	147	157	33	96	66.3962	48	0	0	0	0	1	0	0	0	0	0						0	1	14.7	15.7	9.6	6.63962	4.8
379	0	64	0	0	0	0	0	0	0	#NULL!	#NULL!	0	27.97	7.2	7.2	5.9	6	6	90	171	117	44	115	121.416	19	0	0	0	0	1	0	0	0	0	0						0	1	17.1	11.7	11.5	12.1416	1.9
380	0	32	1	3	0	0	0	0	1	0	1	0	27.67	6.2	6	6	6.4	6.4	100.667	221	187	45	149	104.937	69	0	0	0	0	2	0	0	0	0	0						0	1	22.1	18.7	14.9	10.4937	6.9
381	0	64	1	3	0	0	0	0	1	1	1	0	22.31	5.7	5.6	5.9	5.9	5.9	89	256	120	42	173	43.5976	28	0	1	1	0	1	0	0	0	0	0						0	1	25.6	12	17.3	4.35976	2.8
382	0	51	0	2	0	0	0	0	1	1	1	0	23.59	6.8	6.3	6.3	6.5	6	76.3333	155	53	57	90	88.5743	15	0	0	0	0	1	0	0	0	0	0						0	1	15.5	5.3	9	8.85743	1.5
383	0	46	0	3	1	0	0	0	1	1	0	0	23.82	6.7	6.4	6.7	7.1	6.9	91.3333	162	89	59	86	103.629	38	0	1	1	0	2	1	0	0	0	0						0	2	16.2	8.9	8.6	10.3629	3.8
384	0	56	0	3	0	0	0	0	1	0	0	0	22.07	6.1	6.1	6.4	6.4	6.6	76.3333	181	74	55	111	124.732	82	0	0	0	0	1	0	0	0	0	0						0	1	18.1	7.4	11.1	12.4732	8.2
385	0	36	1	2	0	0	0	1	1	1	1	0	35.75	6.4	7.4	5.4	5.5	6	95	226	370	36	140	84.549	108	0	1	0	0	1	0	0	0	0	0						0	1	22.6	37	14	8.4549	10.8
386	1	59	0	1	1	0	0	1	1	1	1	0	22.3	7.4	7.1	7.1	8.4	7.1	113	246	225	52	162	85.6477	15	0	1	1	0	1	0	0	0	0	0						1	1	24.6	22.5	16.2	8.56477	1.5
387	0	52	0	2	1	0	0	0	1	0	0	0	27.92	5.9	6	6.3	6.1	6.3	94	145	116	41	85	151.118	13	0	1	1	1	1	0	0	0	0	0						0	1	14.5	11.6	8.5	15.1118	1.3
388	0	52	0	2	0	0	0	1	1	1	1	0	27.34	6.6	6.7	7.2	5.7	5.9	102	163	182	47	91	151.118	25	0	1	0	0	3	0	0	0	0	0						0	1	16.3	18.2	9.1	15.1118	2.5
389	0	55	1	3	0	0	0	2	1	1	0	0	26.35	6.3	6.1	5.9	6.2	6.6	91.6667	184	216	47	103	62.8593	20	0	1	0	0	1	0	0	0	0	0						0	1	18.4	21.6	10.3	6.28593	2
390	0	52	1	3	0	0	0	0	1	1	1	0	23.12	6.9	6.6	6.5	6.1	5.7	87.3333	176	101	44	113	75.7132	79	0	0	0	0	1	0	0	0	0	0						0	1	17.6	10.1	11.3	7.57132	7.9
391	0	59	1	1	0	0	0	0	1	1	1	0	23.05	7.5	7.5	6.7	6.7	6.9	84.6667	179	86	56	91	82.2887	26	0	0	0	0	3	0	0	0	0	0						0	1	17.9	8.6	9.1	8.22887	2.6
392	0	64	1	3	1	0	0	1	1	1	1	0	23.45	6.3	6.3	6.4	6.3	6.3	86.3333	179	112	50	104	77.92	24	0	0	1	0	2	0	0	0	0	0						0	2	17.9	11.2	10.4	7.792	2.4
393	0	59	0	1	0	0	0	2	1	1	1	0	25.18	6.3	6.5	6.1	6.5	6	99.3333	200	138	54	114	70.12	23	0	1	1	0	1	0	0	0	0	0						0	2	20	13.8	11.4	7.012	2.3
394	0	64	0	1	0	0	0	2	1	0	1	1	20.32	5.6	5.7	5.5	6	5.6	94.6667	218	69	50	145	115.773	33	0	1	1	0	3	0	0	0	0	0						0	2	21.8	6.9	14.5	11.5773	3.3
395	1	52	1	2	0	0	0	2	1	1	1	0	23.43	7	7.3	8	8	8.5	86.3333	187	116	58	114	70.2946	40	0	0	0	0	2	0	0	0	0	0						1	1	18.7	11.6	11.4	7.02946	4
396	0	56	0	1	1	0	0	2	1	1	1	0	22.67	7.7	6.5	6.4	6.4	6.6	89	161	163	66	71	99.57	31	0	0	1	0	1	0	0	0	0	0						0	2	16.1	16.3	7.1	9.957	3.1
397	0	60	0	2	1	0	0	2	1	#NULL!	#NULL!	1	19.73	7.7	6.1	5.6	5.4	5.5	87.6667	156	91	44	92	76.4658	24	0	0	0	0	3	0	0	0	0	0						0	2	15.6	9.1	9.2	7.64658	2.4
398	0	47	1	1	0	0	0	0	1	0	1	0	26.73	6	6.3	6.7	6.5	6.3	98	155	127	41	91	64.8974	21	0	1	0	0	2	0	0	0	1	0						0	1	15.5	12.7	9.1	6.48974	2.1
399	0	64	0	3	0	0	0	0	1	0	0	0	24.66	7.1	6.4	6.3	6.1	6.1	97.6667	151	67	48	71	102.618	26	0	1	0	0	3	1	0	0	0	0						0	2	15.1	6.7	7.1	10.2618	2.6
400	0	54	1	3	1	0	0	2	1	1	1	0	25.11	6	6	5.7	6.1	6.3	85	122	59	50	52	91.1	22	0	0	1	0	3	0	0	0	0	0						0	2	12.2	5.9	5.2	9.11	2.2
401	0	63	0	1	0	0	0	0	1	#NULL!	#NULL!	0	25.1	6.4	5.8	5.8	5.7	6	100	178	90	54	107	72.4453	31	0	1	0	0	1	0	0	0	0	0						0	1	17.8	9	10.7	7.24453	3.1
402	0	59	0	1	1	0	0	1	1	1	1	1	27.57	5.2	5.6	5.4	5.3	5.6	116.667	148	64	46	87	135.169	18	0	1	0	0	2	0	0	1	0	0						0	2	14.8	6.4	8.7	13.5169	1.8
403	0	61	0	0	0	0	0	1	1	1	1	0	27.94	7	7.3	6	6.4	6.7	103	138	185	31	66	124.639	33	0	1	1	0	2	0	1	0	0	0						0	2	13.8	18.5	6.6	12.4639	3.3
404	0	60	1	1	0	0	0	2	1	1	1	0	25.79	6.5	6.7	6.2	6.8	6.1	105.333	141	120	43	77	79.295	26	0	0	1	0	1	0	0	0	0	0						0	2	14.1	12	7.7	7.9295	2.6
405	0	40	1	3	1	0	0	2	1	1	1	0	31.12	5.9	5.9	5.9	6.4	6.4	93	201	267	34	116	73.7693	40	0	1	1	0	1	1	1	0	0	0						0	1	20.1	26.7	11.6	7.37693	4
406	0	48	0	3	1	0	0	1	1	1	1	0	22.27	5.7	5.8	5.7	5.9	6.1	113.667	201	62	75	113	117.477	18	0	1	1	0	1	0	0	0	0	0						0	2	20.1	6.2	11.3	11.7477	1.8
407	0	54	0	0	0	0	0	1	1	#NULL!	#NULL!	0	22.02	7	6.3	6.3	6.1	6.1	101	233	90	40	172	87.2013	46	0	1	1	0	1	0	0	0	0	0						0	1	23.3	9	17.2	8.72013	4.6
408	1	56	0	3	1	0	0	2	1	1	1	0	27.55	6.7	7.1	7.6	6.9	7.3	93.6667	110	113	37	55	143.372	26	0	0	1	0	1	0	0	0	0	0						1	2	11	11.3	5.5	14.3372	2.6
409	1	53	1	1	1	0	0	1	1	0	1	0	25.84	6.6	7.5	8.1	8.1	9.2	90.3333	242	277	56	130	94.8186	32	0	0	1	1	1	0	0	0	0	0						1	1	24.2	27.7	13	9.48186	3.2
410	0	56	0	1	1	0	0	2	1	1	0	0	25.86	6	6	6.2	6.1	6.1	111.333	147	67	48	77	127.171	20	0	1	1	0	2	1	0	0	0	0						0	2	14.7	6.7	7.7	12.7171	2
411	0	52	0	2	1	0	0	1	1	1	1	0	30.38	6.2	6	5.9	5.5	5.8	94.6667	161	217	35	85	130.893	24	0	0	0	0	1	0	0	0	0	0						0	2	16.1	21.7	8.5	13.0893	2.4
412	0	48	0	2	1	0	0	2	1	1	1	0	25.32	6	6.3	6.4	6.3	6.1	104.667	195	166	54	83	100.858	26	0	1	0	0	1	0	0	0	0	0						0	2	19.5	16.6	8.3	10.0858	2.6
413	0	44	1	3	1	1	0	0	1	1	1	0	27.73	6.3	6.2	6.1	6.3	6.9	90.6667	201	194	42	111	65.7721	45	0	0	0	0	1	0	0	0	0	0						0	1	20.1	19.4	11.1	6.57721	4.5
414	0	41	1	2	1	0	0	1	1	1	1	1	22.24	5.3	5.5	5.6	5.5	5.5	84.3333	155	26	59	81	93.8592	20	0	0	0	0	1	0	0	0	0	0						0	2	15.5	2.6	8.1	9.38592	2
415	0	50	0	2	1	0	0	0	1	0	1	0	24.12	7.3	7.7	7.7	6.2	6.6	84.3333	194	139	59	108	111.089	17	0	0	1	0	1	0	0	0	0	0						0	1	19.4	13.9	10.8	11.1089	1.7
416	0	46	0	2	1	0	0	2	1	0	0	0	28.18	7.5	6.3	5.7	5.8	5.6	84	247	709	48	90	59.6901	27	0	1	1	0	1	0	0	0	0	0						0	1	24.7	70.9	9	5.96901	2.7
417	0	59	1	2	1	1	1	0	1	1	1	0	26.59	5.7	5.7	5.7	5.7	5.5	99	192	336	42	95	79.2174	17	0	1	0	0	3	0	0	0	0	0						0	2	19.2	33.6	9.5	7.92174	1.7
418	0	52	1	1	1	1	1	2	1	1	1	1	34.97	6.8	7.2	6.7	6.8	7	98.3333	170	256	33	97	124.085	34	0	1	0	1	4	0	0	0	0	0						0	1	17	25.6	9.7	12.4085	3.4
419	0	52	0	1	1	0	0	0	1	0	1	0	29.9	6.2	6.3	6.1	6.2	5.9	107	236	177	54	150	75.323	17	0	1	1	0	1	0	0	1	0	0						0	1	23.6	17.7	15	7.5323	1.7
420	0	47	1	2	0	0	0	0	1	0	0	0	30.24	6.7	6.6	7	6.6	6.5	100.667	149	225	32	85	86.1289	84	0	0	0	0	1	0	0	0	0	0						0	1	14.9	22.5	8.5	8.61289	8.4
421	0	43	1	2	0	1	0	1	1	0	1	0	28.45	5.7	5.3	5	5	5.2	111.667	173	1263	30	19	66.0798	63	0	1	1	1	2	0	0	0	0	0						0	1	17.3	126.3	1.9	6.60798	6.3
422	0	58	0	3	1	0	0	1	1	1	1	1	29.42	7.6	6.1	6	6.3	6.4	105	115	62	46	58	90.0884	21	0	1	1	0	1	0	0	0	0	0						0	2	11.5	6.2	5.8	9.00884	2.1
423	0	43	1	2	1	0	0	0	1	0	1	0	25.73	6.4	6.2	6.5	6.5	6.2	107	146	138	45	75	91.6687	66	0	0	0	0	3	0	0	0	0	0						0	1	14.6	13.8	7.5	9.16687	6.6
424	0	45	1	2	1	0	0	2	1	1	1	0	23.11	5.4	5.4	5.5	5.6	5.9	93	156	92	49	101	81.3833	20	0	0	0	0	3	0	0	0	0	0						0	1	15.6	9.2	10.1	8.13833	2
425	1	56	0	1	0	0	0	1	1	0	0	0	26.58	7.1	7	7.5	7.5	7.3	112.333	282	211	52	199	64.7685	25	0	1	1	0	2	0	0	0	0	0						1	1	28.2	21.1	19.9	6.47685	2.5
426	0	52	0	2	1	0	0	2	1	1	0	1	26.93	6.9	6	5.8	5.9	5.7	81	176	79	61	95	58.2228	21	0	0	1	1	1	0	0	0	0	0						0	2	17.6	7.9	9.5	5.82228	2.1
427	0	54	1	2	1	0	0	2	1	1	0	1	28.86	6.5	6	6.4	6.2	6.1	110	207	237	48	111	92.67	21	0	1	1	0	1	0	0	0	0	0						0	2	20.7	23.7	11.1	9.267	2.1
428	0	47	0	2	1	0	0	2	1	1	0	1	27.45	6.4	6	6	6.1	6.2	82	180	84	50	115	121.011	12	0	1	1	0	2	1	0	0	0	0						0	2	18	8.4	11.5	12.1011	1.2
429	0	51	0	1	1	0	0	2	1	1	1	0	34.19	7.1	7.7	7.7	6.4	6.6	86.3333	190	85	48	124	104.98	56	0	1	1	0	2	0	0	0	0	0						0	1	19	8.5	12.4	10.498	5.6
430	0	61	0	1	1	0	0	0	1	1	1	1	26.15	6.1	5.6	5.6	6	6	88.3333	163	99	32	114	116.838	25	0	1	1	1	4	0	0	1	0	0						0	2	16.3	9.9	11.4	11.6838	2.5
431	0	53	1	2	0	1	0	2	1	1	1	0	30.74	5.7	6.2	6.1	6.7	6.3	106	207	235	36	135	105.28	55	0	1	1	0	2	0	0	0	0	0						0	1	20.7	23.5	13.5	10.528	5.5
432	0	52	0	2	1	0	0	0	1	1	0	0	28.12	7.3	6.3	6.5	6.5	6.2	82.3333	190	354	42	100	87.8719	29	0	1	0	0	1	0	0	0	0	0						0	1	19	35.4	10	8.78719	2.9
433	0	43	1	1	0	0	0	0	1	1	0	0	28.5	6.9	6.7	6.6	7.2	6.6	106.667	126	81	31	77	135.858	22	0	1	1	0	1	0	0	0	0	0						0	2	12.6	8.1	7.7	13.5858	2.2
434	0	53	1	2	1	0	0	0	1	0	0	0	27.91	6.2	6	6.1	6.3	6.1	85.3333	166	116	43	101	63.3337	29	0	1	1	0	4	0	0	0	0	0						0	1	16.6	11.6	10.1	6.33337	2.9
435	0	61	1	1	0	1	0	1	1	0	1	0	29.58	7.3	6.8	6.6	6.6	6.2	120	189	266	47	112	61.5518	19	0	1	1	1	3	0	0	0	0	0						0	1	18.9	26.6	11.2	6.15518	1.9
436	0	47	1	1	0	0	0	0	1	1	0	0	25.51	6	6.1	6.3	6.3	5.8	109.333	128	83	39	73	77.2623	20	0	1	1	1	1	0	0	0	0	0						0	1	12.8	8.3	7.3	7.72623	2
437	0	63	0	3	0	0	0	0	1	#NULL!	#NULL!	0	27.88	7.2	7.2	7	7	7	102.667	220	117	46	138	84.5148	51	0	0	1	0	2	0	1	0	0	0						0	1	22	11.7	13.8	8.45148	5.1
438	0	56	1	3	1	0	0	0	1	0	0	0	24.57	6.3	6.9	6.5	6.4	6.6	83	155	110	40	91	67.5665	31	0	0	1	0	2	0	0	0	0	0						0	1	15.5	11	9.1	6.75665	3.1
439	0	60	0	3	0	0	0	2	1	1	1	0	22.94	6.9	6.7	6.4	7.3	6.7	103.667	189	57	57	129	85.6477	22	0	1	0	0	1	0	0	0	0	0						0	1	18.9	5.7	12.9	8.56477	2.2
440	0	59	0	2	0	0	0	1	1	0	0	0	20.69	6.6	6.6	6.8	6.6	6.6	93	174	92	56	103	92.5402	18	0	0	0	0	1	0	0	0	0	0						0	1	17.4	9.2	10.3	9.25402	1.8
441	0	62	0	1	0	0	0	0	1	0	1	0	24.24	6.7	6.4	7.1	7.1	6.5	96.3333	160	123	40	104	72.681	31	0	1	1	0	1	0	0	0	0	0						0	1	16	12.3	10.4	7.2681	3.1
442	0	55	0	1	1	0	0	0	1	1	1	0	22.8	6.3	6.2	6.1	6.2	6.1	82.6667	218	98	64	141	86.8771	20	0	0	1	0	1	0	0	0	0	0						0	1	21.8	9.8	14.1	8.68771	2
443	0	58	0	1	1	0	0	0	1	1	1	0	27.44	6	5.9	5.6	5.6	5.8	88.6667	182	73	53	117	106.405	16	0	1	0	0	2	0	0	1	0	0						0	1	18.2	7.3	11.7	10.6405	1.6
444	0	61	1	3	1	0	0	2	1	1	1	0	25.44	7.2	6.3	6.1	6.6	6.2	90.3333	177	57	40	133	71.8065	10	0	0	1	0	1	0	0	0	0	0						0	2	17.7	5.7	13.3	7.18065	1
445	0	44	0	2	1	0	0	0	1	#NULL!	#NULL!	0	31.22	4	5.7	6.3	5.5	5.5	88.3333	157	217	33	89	133.422	9	0	1	0	1	4	0	0	0	1	0						0	1	15.7	21.7	8.9	13.3422	0.9
446	0	52	0	1	1	0	0	0	1	0	0	0	27.48	7.6	7.2	7.5	6.7	6.7	100.667	198	135	53	125	108.636	30	0	0	1	0	1	0	0	0	0	0						0	1	19.8	13.5	12.5	10.8636	3
447	1	52	0	1	1	0	0	0	1	0	1	0	26.59	7.3	7.1	7.8	7.8	7.8	111	157	179	44	84	108.636	21	0	1	0	1	1	0	0	0	0	0						1	1	15.7	17.9	8.4	10.8636	2.1
448	0	50	0	2	1	0	0	0	1	1	1	0	24.12	6	6.3	6	6	6.4	94.6667	218	160	38	156	94.7976	26	0	0	1	0	1	0	0	0	0	0						0	2	21.8	16	15.6	9.47976	2.6
449	1	55	0	1	0	0	0	0	1	0	1	0	38.22	6.1	6.9	6.8	6.5	7.6	95	220	152	53	141	51.3798	24	0	1	1	1	4	1	1	0	0	0						1	1	22	15.2	14.1	5.13798	2.4
450	1	49	0	1	1	0	0	0	1	#NULL!	#NULL!	0	27.88	7.4	7.2	7.6	7.6	7.6	83.3333	172	206	46	103	66.2758	72	0	0	0	0	1	0	0	0	0	0						1	1	17.2	20.6	10.3	6.62758	7.2
451	0	56	1	3	0	0	0	0	1	0	1	0	22.94	6.9	6.9	6.7	7	7	110.667	255	147	59	171	62.6298	26	0	0	1	0	1	0	0	0	0	0						0	1	25.5	14.7	17.1	6.26298	2.6
452	0	46	0	2	1	0	0	0	1	0	1	0	24.86	6.7	6.2	6.5	5.8	6.3	116.333	158	303	33	76	111.355	22	0	1	0	1	4	0	0	0	0	0						0	1	15.8	30.3	7.6	11.1355	2.2
453	0	44	1	3	0	0	0	2	1	1	0	0	21.75	6.9	6.6	6.6	6	6.3	100	167	94	56	89	87.2764	39	0	0	0	0	2	0	0	0	0	0						0	1	16.7	9.4	8.9	8.72764	3.9
454	0	51	0	2	0	0	0	0	1	0	1	0	26.88	6.6	6.4	6.4	6.3	6.3	106.333	220	238	40	151	75.6205	66	0	1	0	0	1	0	0	0	0	0						0	1	22	23.8	15.1	7.56205	6.6
455	0	55	1	3	0	0	0	1	1	1	1	0	21.43	6	6	5.6	5.7	5.7	101.333	177	183	39	96	84.0478	25	0	1	1	0	1	0	0	0	0	0						0	1	17.7	18.3	9.6	8.40478	2.5
456	0	47	0	1	1	0	0	1	1	0	1	0	24.3	6.9	6.5	7	7.1	6.9	109.667	190	144	50	123	214.671	63	0	0	1	0	1	0	0	0	0	0						0	2	19	14.4	12.3	21.4671	6.3
457	0	57	0	3	1	0	0	1	1	1	1	1	17.49	7.9	6.5	6.6	6.6	6.6	83.6667	118	45	55	43	163.931	15	0	1	1	0	1	0	0	0	0	0						0	1	11.8	4.5	4.3	16.3931	1.5
458	0	45	0	1	1	0	0	0	1	0	0	0	28.48	7.1	6.6	6.6	6.9	6.9	116.333	223	254	52	137	77.2212	27	0	1	1	1	3	1	1	0	0	0						0	1	22.3	25.4	13.7	7.72212	2.7
459	0	57	0	3	1	0	0	1	1	1	1	0	22.06	7	7	6.8	6.3	6.7	87.3333	191	59	81	100	93.1851	21	0	0	1	0	1	0	0	0	0	0						0	1	19.1	5.9	10	9.31851	2.1
460	0	47	1	3	0	1	1	0	0	0	1	0	24.44	7.1	6.6	6.3	6.4	6.7	85.6667	193	91	63	119	90.0638	17	0	0	0	0	2	0	0	0	0	0						0	1	19.3	9.1	11.9	9.00638	1.7
461	0	51	1	3	1	0	0	0	1	0	0	0	26.29	5.4	5.1	5.1	5.3	5.3	104	129	119	44	75	78.7773	22	0	1	1	1	3	0	0	0	0	0						0	1	12.9	11.9	7.5	7.87773	2.2
462	1	59	1	2	1	0	0	0	1	1	1	0	21.79	7.2	7.2	7.2	6.7	7.1	98.6667	153	225	47	75	98.944	34	0	0	0	0	1	0	0	0	0	0						1	1	15.3	22.5	7.5	9.8944	3.4
463	0	50	0	3	1	0	0	2	1	1	1	0	19.98	6.4	6.4	6.3	6.1	6.1	93.3333	196	120	80	106	66.2758	17	0	0	0	0	1	0	0	0	0	0						0	1	19.6	12	10.6	6.62758	1.7
464	1	46	0	1	0	0	0	0	1	1	1	0	21.52	6	8.6	8.6	8.5	8.8	109.667	237	78	61	138	97.2976	25	0	0	1	0	1	1	0	0	0	0						1	1	23.7	7.8	13.8	9.72976	2.5
465	0	62	0	2	1	0	0	2	1	1	1	0	26.85	7	6.7	6.2	6.5	5.9	113.667	176	38	70	91	122.19	21	0	0	1	0	1	0	0	0	0	0						0	2	17.6	3.8	9.1	12.219	2.1
466	1	43	0	3	1	0	0	0	1	1	1	0	27.54	7.6	8.9	7.8	7	7.2	90.6667	168	255	36	93	94.43	19	0	1	0	0	2	1	0	0	0	0						1	2	16.8	25.5	9.3	9.443	1.9
467	0	46	0	2	0	0	0	2	1	0	1	0	21.31	5.5	5.8	5.5	5.5	5.7	99.6667	185	65	55	121	90.0863	13	0	1	0	0	1	0	0	0	0	0						0	1	18.5	6.5	12.1	9.00863	1.3
468	1	49	0	1	0	0	0	0	1	1	0	0	40.24	7.4	6.7	7.1	6.7	7.2	108.333	170	136	40	106	91.96	22	0	1	1	0	1	0	0	0	0	0						1	2	17	13.6	10.6	9.196	2.2
469	0	50	0	2	1	0	0	1	1	1	1	0	35.77	6.3	6.1	5.5	6	5.8	88.6667	190	144	51	114	111.82	39	0	0	0	0	1	0	0	0	0	0						0	2	19	14.4	11.4	11.182	3.9
470	0	47	0	3	1	0	0	0	1	1	1	0	30.06	7.8	6.7	6.4	6.2	6.2	94	162	248	35	94	89.69	33	0	0	1	1	1	0	0	0	0	0						0	2	16.2	24.8	9.4	8.969	3.3
471	0	33	0	2	1	0	0	0	1	#NULL!	#NULL!	1	34.72	6.9	6.3	6.8	7.5	7	117.667	223	96	71	136	93.2872	17	0	1	0	0	1	1	0	0	0	0						0	2	22.3	9.6	13.6	9.32872	1.7
472	0	62	1	2	1	0	0	0	1	0	0	0	25.5	6	6.2	6.1	6.3	6.3	68	182	70	40	111	75.7151	20	0	0	0	0	1	0	1	0	0	0						0	1	18.2	7	11.1	7.57151	2
473	0	58	0	1	0	0	0	1	1	1	1	1	23.19	5.7	5.7	7.1	6.8	6.4	89	136	138	46	68	78.1641	15	0	0	1	0	3	0	0	0	0	0						0	2	13.6	13.8	6.8	7.81641	1.5
474	0	51	0	3	0	0	0	0	1	1	1	0	32.49	6.4	6.4	6.5	6.7	6.3	76.3333	184	140	40	116	33.9821	38	0	1	1	0	4	0	0	0	0	0						0	1	18.4	14	11.6	3.39821	3.8
475	0	60	1	3	0	0	0	1	1	1	1	0	28.72	6.7	6.7	6.4	6.5	6.7	93	144	108	47	78	73.66	56	0	1	1	0	1	0	0	0	0	0						0	2	14.4	10.8	7.8	7.366	5.6
476	0	59	0	1	1	0	0	2	1	0	1	0	22.22	7.3	7.3	6.2	6.7	6.3	85.6667	182	101	#NULL!	109	123.426	22	0	0	0	0	1	0	0	0	0	0						0	1	18.2	10.1	10.9	12.3426	2.2
477	0	63	0	2	0	0	0	1	1	0	0	0	24.53	6.2	6.6	5.9	6.3	6.1	96.6667	227	103	78	128	50.1659	18	0	1	1	1	1	0	0	0	0	0						0	1	22.7	10.3	12.8	5.01659	1.8
478	0	59	1	1	0	0	1	0	1	1	1	1	24.46	7.4	7.1	6.5	6.5	6.6	104.667	205	169	52	133	82.2887	6	0	1	1	0	1	0	0	0	0	0						0	1	20.5	16.9	13.3	8.22887	0.6
479	1	45	0	2	0	0	0	0	1	1	1	0	34.63	7.8	7.7	6.7	7.4	8.1	97	133	158	31	75	106.064	35	0	1	0	0	1	0	0	0	0	0						1	2	13.3	15.8	7.5	10.6064	3.5
480	0	60	1	1	0	1	0	0	1	0	1	0	28.12	6.6	5.6	5.6	5.4	5.9	94.3333	123	81	34	67	34.2519	33	2	1	0	0	3	0	0	0	0	0						0	1	12.3	8.1	6.7	3.42519	3.3
481	1	48	1	1	1	0	0	2	1	1	1	0	37.91	7.6	8.5	7.6	8.6	10.4	95	207	177	38	133	116.029	29	0	1	1	1	1	0	0	0	0	0						1	2	20.7	17.7	13.3	11.6029	2.9
482	0	48	0	2	0	0	0	2	1	0	0	0	28.98	6.2	6.1	5.9	6.4	6.1	90.3333	143	115	54	73	89.3114	36	0	1	1	0	1	0	0	0	0	0						0	1	14.3	11.5	7.3	8.93114	3.6
483	0	62	1	1	0	0	0	0	1	0	0	0	24.88	6.2	5.5	5.7	5.9	5.7	104	155	53	69	81	81.4743	78	0	1	0	0	4	0	0	0	0	0						0	1	15.5	5.3	8.1	8.14743	7.8
484	0	51	0	1	0	0	0	0	1	0	0	0	34.16	6.5	6.1	6.9	6.9	6.9	89.3333	155	109	46	91	75.6205	24	0	1	1	0	3	0	0	0	0	0						0	1	15.5	10.9	9.1	7.56205	2.4
485	0	54	1	2	1	0	0	0	1	#NULL!	#NULL!	0	26.26	7.2	7	7.8	6.7	6.9	109.667	241	114	49	155	63.0938	43	0	0	1	0	4	0	0	1	0	0						0	1	24.1	11.4	15.5	6.30938	4.3
486	0	54	1	1	1	0	0	0	1	1	1	0	31.91	6.8	6.5	6.5	6.7	6.6	104	211	113	52	122	94.4633	14	0	1	0	0	1	0	0	0	0	0						0	1	21.1	11.3	12.2	9.44633	1.4
487	0	56	0	2	0	0	0	2	1	1	1	1	25.9	6.3	6.1	6.5	6.3	6.4	93	150	197	43	64	97.4	22	0	1	1	0	1	0	0	0	0	0						0	2	15	19.7	6.4	9.74	2.2
488	0	52	1	2	0	0	0	0	1	1	1	1	26.67	7.2	6.6	6.1	6.2	6.5	82.3333	115	78	45	52	88.27	20	0	1	1	0	3	1	1	0	0	0						0	2	11.5	7.8	5.2	8.827	2
489	0	40	1	3	1	0	0	1	1	1	1	0	18.83	5.9	5.9	6	6	5.7	97.3333	156	42	46	99	97.1884	21	0	0	1	0	1	0	0	0	0	0						0	2	15.6	4.2	9.9	9.71884	2.1
490	0	62	0	0	0	0	0	0	1	0	1	0	22.07	5.9	6.3	6.1	6	6.4	101.667	181	97	51	108	50.3291	12	0	0	0	0	1	0	0	0	0	0						0	1	18.1	9.7	10.8	5.03291	1.2
491	0	37	0	2	1	0	0	1	1	1	1	0	28.79	6	5.4	5.8	5.5	5.6	90	203	169	41	145	80.7107	20	0	0	0	0	1	0	0	0	0	0						0	1	20.3	16.9	14.5	8.07107	2
492	0	46	1	2	1	1	1	0	1	0	1	0	27.13	5.5	5.5	5.5	5.6	5.6	105.333	214	354	37	127	86.5014	29	0	1	0	1	1	0	0	0	0	0						0	1	21.4	35.4	12.7	8.65014	2.9
493	1	62	0	0	0	0	0	0	1	#NULL!	#NULL!	0	24.4	7.6	7.4	7	7.1	7.1	85	198	135	91	88	72.681	22	0	0	0	0	1	0	0	0	0	0						1	1	19.8	13.5	8.8	7.2681	2.2
494	1	64	0	0	0	0	0	2	1	0	1	0	32.67	6.9	6.8	7.4	7.6	7.3	87.6667	213	84	81	121	62.8383	64	0	1	0	0	2	0	0	0	0	0						1	1	21.3	8.4	12.1	6.28383	6.4
495	0	53	0	2	0	0	0	0	1	1	1	0	23.68	7.1	5.7	6.4	6	6.3	115	124	189	51	49	79.6077	42	0	1	0	0	3	0	0	0	0	0						0	2	12.4	18.9	4.9	7.96077	4.2
496	1	59	0	3	0	0	0	0	1	1	1	0	25.8	7.6	7.7	7.2	7.9	7.9	116.333	202	46	93	72	63.8677	40	0	1	0	0	1	0	0	0	0	0						1	1	20.2	4.6	7.2	6.38677	4
497	1	45	0	0	1	0	0	0	1	0	1	0	21.17	6.8	11.7	10	10	10.1	90	294	392	63	195	130.361	26	0	1	1	0	3	0	0	0	0	0						1	1	29.4	39.2	19.5	13.0361	2.6
498	0	52	1	2	0	1	0	2	1	1	1	1	26.65	6.4	6.1	6.7	6.5	6.6	116.333	136	277	32	66	79.3828	35	0	1	0	0	2	0	1	0	0	0						0	2	13.6	27.7	6.6	7.93828	3.5
499	0	62	0	1	1	0	0	2	1	0	1	0	30.24	7	6.4	6.5	6.7	7	99.6667	146	74	45	84	69.432	22	0	1	1	0	2	1	0	0	0	0						0	2	14.6	7.4	8.4	6.9432	2.2
500	0	57	0	3	1	0	0	1	1	1	1	1	23.02	6.3	6.3	5.7	6.2	5.9	93.3333	140	90	54	72	93.95	30	0	0	1	0	3	0	0	0	0	0						0	2	14	9	7.2	9.395	3
501	0	53	0	2	1	0	0	0	1	0	1	0	25.8	6.7	6.9	7.1	7	6.7	90.3333	265	203	57	158	87.2013	41	0	1	1	0	1	0	0	0	0	0						0	1	26.5	20.3	15.8	8.72013	4.1
502	0	61	0	1	0	0	0	0	1	1	0	0	31.36	6.6	7.6	6.1	6	6.2	87.3333	235	162	51	153	122.598	76	0	0	1	0	1	0	0	0	0	0						0	1	23.5	16.2	15.3	12.2598	7.6
503	0	56	0	3	0	0	0	0	0	0	1	0	23.53	6.6	5.5	5.5	5.5	5.5	87.6667	241	176	53	150	103.413	12	0	1	0	0	2	0	0	1	0	0						0	1	24.1	17.6	15	10.3413	1.2
504	0	61	0	1	0	0	0	2	1	1	1	0	27.75	7.2	6.8	6.5	6.5	6.6	90	173	133	39	114	78.5596	21	0	0	0	0	2	0	0	0	0	0						0	2	17.3	13.3	11.4	7.85596	2.1
505	1	31	1	2	1	0	0	0	1	0	0	0	40.73	7.7	8.1	8.5	8.5	8.4	122	222	215	47	149	145.561	76	0	1	1	0	2	0	0	0	0	0						1	1	22.2	21.5	14.9	14.5561	7.6
506	0	57	0	2	0	0	0	2	1	1	1	0	26.84	5.9	6.4	5.6	6.7	6.7	103.667	192	259	44	105	124.288	10	0	1	0	0	1	0	0	0	0	0						0	1	19.2	25.9	10.5	12.4288	1
507	0	52	0	1	1	0	0	2	1	1	1	1	24.17	7.7	6.8	6.9	6.8	6.9	92.6667	236	87	69	152	75.0323	37	0	0	1	0	1	0	0	0	0	0						0	1	23.6	8.7	15.2	7.50323	3.7
508	0	47	1	2	1	0	0	0	1	#NULL!	#NULL!	1	18.24	5	4.9	5.2	5.2	4.7	99	155	74	49	88	92.8259	37	2	0	0	0	3	0	0	0	0	0						0	2	15.5	7.4	8.8	9.28259	3.7
509	1	51	1	2	0	0	0	0	1	0	1	0	26.26	7.4	10.8	10.8	8.6	8.2	98.6667	153	89	50	88	84.7291	28	0	1	1	0	1	0	0	0	0	0						1	1	15.3	8.9	8.8	8.47291	2.8
510	0	61	1	2	0	0	1	1	1	1	1	0	30.01	6.2	6.5	6.6	6.6	6.1	101	169	156	45	100	73.176	40	0	1	0	0	4	0	0	1	0	0						0	2	16.9	15.6	10	7.3176	4
511	0	64	0	0	0	0	0	0	1	1	1	0	32.47	7.2	6.1	6.5	6.2	6.2	113.333	154	106	40	96	91.0368	43	0	1	0	0	1	0	0	0	0	0						0	1	15.4	10.6	9.6	9.10368	4.3
512	1	61	1	0	1	1	0	0	1	0	0	0	27.44	7.7	7.9	7.1	7.3	7.5	86	153	151	33	96	47.9393	29	0	1	1	0	1	0	0	0	0	0						1	1	15.3	15.1	9.6	4.79393	2.9
513	0	58	0	2	0	0	0	2	1	1	1	0	22.66	6.2	6.3	6.2	6.2	6.5	81.3333	186	98	45	107	77.89	20	0	0	1	0	1	0	0	0	0	0						0	2	18.6	9.8	10.7	7.789	2
514	0	61	1	3	1	0	0	2	1	1	1	0	34.02	7	6.9	6.8	6.9	7	122.333	114	143	36	58	75.9654	34	0	1	1	0	2	0	0	0	0	0						0	1	11.4	14.3	5.8	7.59654	3.4
515	1	53	0	2	0	0	0	1	1	1	1	1	34.55	7.2	7.6	7.4	7.4	7.2	96.6667	166	76	47	103	84.41	16	2	0	0	0	3	0	0	0	0	0						1	2	16.6	7.6	10.3	8.441	1.6
516	0	52	1	3	1	0	0	0	1	0	1	0	26.21	5.9	5.9	6.1	6.1	6	114.667	240	86	58	165	62.6132	18	0	0	1	0	1	1	0	0	0	0						0	1	24	8.6	16.5	6.26132	1.8
517	0	59	0	2	0	0	0	2	1	1	1	0	18.9	6.1	5.8	5.9	6	6.1	101.333	208	58	91	102	103.97	18	0	1	1	0	1	0	0	0	0	0						0	2	20.8	5.8	10.2	10.397	1.8
518	0	45	1	2	0	0	0	1	1	1	1	0	24.86	6	5.6	5.5	6	5.7	92	150	78	37	93	90.8453	21	0	1	0	0	1	0	1	0	0	0						0	2	15	7.8	9.3	9.08453	2.1
519	0	55	0	1	0	0	0	0	1	0	1	0	29.36	6.7	7	7.1	6.5	6.5	96	190	86	69	105	107.415	67	0	1	1	0	1	0	0	0	1	0						0	1	19	8.6	10.5	10.7415	6.7
520	0	57	0	3	1	0	0	2	1	1	0	0	24.56	7.9	7.2	7.1	6.9	6.8	86.6667	153	231	35	89	127.171	21	0	0	0	1	3	0	0	0	0	0						0	2	15.3	23.1	8.9	12.7171	2.1
521	1	58	0	1	0	0	0	0	1	0	1	0	23.08	7.5	6.9	6.4	6.4	7.1	70.6667	217	118	62	122	73.4164	9	0	0	0	0	1	0	0	0	0	0						1	1	21.7	11.8	12.2	7.34164	0.9
522	0	60	1	1	0	0	0	2	1	1	0	1	22.9	6.6	6.1	6.1	6.4	6.1	100.667	193	342	43	77	91.94	18	0	1	0	0	1	0	0	0	0	0						0	2	19.3	34.2	7.7	9.194	1.8
523	1	43	0	2	1	0	0	0	1	1	0	0	33.06	7.9	7.4	7	6.6	7.4	98.6667	140	113	43	77	166.563	25	0	0	1	0	1	0	0	0	0	0						1	2	14	11.3	7.7	16.6563	2.5
524	0	58	1	2	1	0	0	2	1	0	1	0	22.56	7.9	6.4	6.4	6.3	6.5	112	181	61	88	89	76.7471	21	0	0	1	0	1	0	0	0	0	0						0	1	18.1	6.1	8.9	7.67471	2.1
525	0	44	1	2	0	0	0	0	1	0	1	0	23.42	6.4	6.5	7.5	7.5	6.3	90	153	195	48	86	91.6687	28	0	1	0	0	2	0	1	0	0	0						0	1	15.3	19.5	8.6	9.16687	2.8
526	0	50	1	3	1	0	0	1	1	1	1	0	26.27	6.1	5.7	5.6	5.9	5.7	100.333	166	117	36	113	103.82	69	0	1	1	0	1	0	0	0	0	0						0	2	16.6	11.7	11.3	10.382	6.9
527	0	62	0	1	0	0	0	#NULL!	0	#NULL!	#NULL!	0	30.38	7.7	7	7	7	7	102.333	188	172	47	97	84.5148	22	0	0	0	0	1	0	0	0	0	0						0	1	18.8	17.2	9.7	8.45148	2.2
528	0	37	0	3	0	0	0	0	1	0	1	0	27.05	7.1	6	6	6	6	100	215	140	44	123	135.615	42	0	0	1	0	3	0	0	0	0	0						0	1	21.5	14	12.3	13.5615	4.2
529	0	51	0	2	0	0	0	2	1	1	1	0	29.15	5.8	6.1	5.8	6.1	5.9	93.6667	164	95	54	100	75.6205	34	0	0	0	0	1	0	0	0	0	0						0	1	16.4	9.5	10	7.56205	3.4
530	0	51	1	2	0	1	1	0	1	0	1	0	32.5	6.2	6.1	6.3	6.3	6.3	90.3333	158	49	62	81	88.9622	19	0	0	1	1	1	0	0	0	1	0						0	1	15.8	4.9	8.1	8.89622	1.9
531	0	60	1	2	0	1	0	1	1	#NULL!	#NULL!	0	24.33	6.4	6.8	6.4	6.3	6.4	99.3333	196	128	40	129	98.6069	27	0	0	1	0	2	0	0	0	0	0						0	2	19.6	12.8	12.9	9.86069	2.7
532	0	57	1	3	1	0	0	1	1	1	1	0	25.35	6.8	5.8	6	6.4	6.2	88.6667	175	194	31	99	96.4986	20	0	1	1	0	2	1	0	0	0	0						0	2	17.5	19.4	9.9	9.64986	2
533	0	62	1	2	1	0	0	2	1	1	0	0	34.29	5.9	5.7	5.6	5.5	5.6	87.6667	206	111	36	145	88.9155	35	0	1	1	0	2	0	0	0	0	0						0	2	20.6	11.1	14.5	8.89155	3.5
534	1	42	1	3	1	1	0	0	0	1	1	1	26.89	7	6.3	6.4	6.9	7.3	97.3333	201	164	47	129	91.366	24	0	0	1	0	1	0	0	0	0	0						1	2	20.1	16.4	12.9	9.1366	2.4
535	0	45	0	2	1	0	0	0	1	1	1	1	20.08	6.1	6.1	5.8	5.7	5.9	90.6667	212	113	49	138	201.078	28	0	0	1	0	2	0	0	0	0	0						0	2	21.2	11.3	13.8	20.1078	2.8
536	0	57	0	2	1	0	0	#NULL!	0	#NULL!	#NULL!	0	27.45	7.2	6.2	6.3	6.3	6.3	108.333	156	72	54	91	118.447	37	0	0	0	0	2	1	0	0	0	0						0	2	15.6	7.2	9.1	11.8447	3.7
537	0	63	1	1	0	0	0	2	1	0	1	0	25.77	6.8	5.9	6.6	6.1	6.6	112	134	72	60	61	75.4696	22	0	1	1	0	2	0	0	1	0	0						0	1	13.4	7.2	6.1	7.54696	2.2
538	0	53	0	3	1	0	0	0	1	1	0	0	23.16	6.5	6.7	6.6	6.7	7	97.3333	177	78	46	111	90.1676	18	0	0	1	0	2	0	0	0	0	0						0	2	17.7	7.8	11.1	9.01676	1.8
539	0	61	0	2	0	0	0	2	1	0	0	0	22.39	6.7	6.7	6.7	6.8	6.8	101	268	222	73	177	56.3664	19	0	0	1	0	1	0	0	0	0	0						0	1	26.8	22.2	17.7	5.63664	1.9
540	0	56	0	2	1	0	0	2	1	1	1	0	29.56	6.8	6.8	6.6	6.5	6.6	82	167	82	48	96	121.54	21	0	0	1	0	1	0	0	0	0	0						0	2	16.7	8.2	9.6	12.154	2.1
541	0	53	1	2	1	1	0	0	1	1	1	1	27.44	6.4	5.8	6	6.2	6.2	91.6667	146	227	24	94	88.0851	54	0	0	1	0	1	0	0	0	0	0						0	2	14.6	22.7	9.4	8.80851	5.4
542	1	42	1	2	0	0	1	0	1	0	1	0	27.94	6.3	7.4	7.4	8.3	9	126	131	105	42	79	71.5697	49	0	1	0	0	1	0	0	0	0	0						1	1	13.1	10.5	7.9	7.15697	4.9
543	0	63	0	1	0	0	0	0	1	0	1	0	27.85	7.6	6.7	6.7	6.6	6.5	102.333	236	213	51	128	104.514	30	0	0	0	0	1	0	0	0	0	0						0	1	23.6	21.3	12.8	10.4514	3
544	0	60	0	1	0	0	0	1	1	0	1	0	30.95	6.7	6.7	6.9	6.4	6.5	104.667	128	144	33	66	123.008	31	0	1	1	0	2	0	0	0	0	0						0	1	12.8	14.4	6.6	12.3008	3.1
545	0	61	1	1	1	0	0	0	1	1	1	1	26.44	6.7	6.1	6.2	5.7	5.7	102	156	233	44	79	66.4208	39	0	1	0	0	1	1	1	0	0	0						0	1	15.6	23.3	7.9	6.64208	3.9
546	0	63	0	2	0	0	0	0	1	1	0	0	47.53	6.5	6.8	6.9	6.4	6.3	113.667	166	79	69	81	73.5	55	0	1	0	0	4	1	0	0	1	0						0	2	16.6	7.9	8.1	7.35	5.5
547	0	46	1	3	0	0	0	0	1	1	1	0	23.45	6.5	6.4	5.6	5.9	6	86.6667	147	179	37	84	83.9578	76	0	1	0	0	1	0	0	0	0	0						0	2	14.7	17.9	8.4	8.39578	7.6
548	1	64	1	1	0	0	0	0	1	0	0	0	26.96	7.4	7.4	8	8	7.5	104.333	251	121	40	156	75.2287	63	0	1	1	0	2	0	0	0	0	0						1	1	25.1	12.1	15.6	7.52287	6.3
549	0	49	0	1	1	0	0	0	1	0	0	0	21.12	5.7	5.9	6	6.5	6.4	85	164	96	57	84	76.2371	16	0	0	0	0	1	0	0	0	0	0						0	1	16.4	9.6	8.4	7.62371	1.6
550	0	63	0	1	0	0	0	1	1	0	1	0	23.98	7.7	6.3	6.4	5.9	6.4	100	119	62	49	52	119.099	36	0	0	1	0	1	0	0	0	0	0						0	2	11.9	6.2	5.2	11.9099	3.6
551	0	55	1	2	1	0	0	2	1	1	1	0	25.87	6.2	5.5	5.3	5.4	5.4	97	182	163	43	122	72.6089	14	0	1	1	0	2	0	0	0	0	0						0	1	18.2	16.3	12.2	7.26089	1.4
552	0	50	1	3	1	0	0	1	1	1	1	0	37.44	7.2	7.4	7.2	7.7	6.8	107.667	167	80	51	97	77.3077	39	0	0	0	0	1	0	0	0	0	0						0	2	16.7	8	9.7	7.73077	3.9
553	0	59	0	1	1	0	0	1	1	1	1	1	25.52	6.3	6.2	6.3	6.6	6.2	69	148	68	50	80	113.13	22	0	1	1	0	2	1	1	1	0	0						0	2	14.8	6.8	8	11.313	2.2
554	0	64	0	1	0	0	0	1	0	1	1	0	23.78	7.7	6.8	6.6	6.4	6.4	75.6667	134	92	45	69	111.278	25	0	1	1	0	3	1	0	0	0	0						0	2	13.4	9.2	6.9	11.1278	2.5
555	0	46	0	2	1	0	0	0	1	1	1	0	30.41	6.7	7.1	6.6	7.3	6.6	97.6667	158	107	43	91	94.34	45	0	1	1	0	2	0	0	0	0	0						0	2	15.8	10.7	9.1	9.434	4.5
556	0	55	0	1	1	0	0	0	1	0	1	0	29.6	5.7	5.6	5.4	5.5	5.6	95.6667	227	116	47	155	125.187	84	0	1	1	0	4	0	0	0	0	0						0	1	22.7	11.6	15.5	12.5187	8.4
557	0	58	1	2	0	1	0	1	1	1	0	0	28.46	6.1	6.2	5.9	6.4	5.9	50	140	46	43	88	76.48	17	0	1	1	0	2	1	1	0	0	0						0	2	14	4.6	8.8	7.648	1.7
558	0	49	1	1	1	0	0	2	1	1	1	0	29.06	7.1	6.7	6.9	6.9	6.9	126	164	224	34	106	102.745	22	0	1	0	1	1	0	0	0	0	0						0	1	16.4	22.4	10.6	10.2745	2.2
559	0	52	1	3	1	0	0	1	1	0	1	0	22.55	6.2	6.2	5.5	5.7	6	91.3333	180	390	33	86	95.1821	25	0	0	0	0	1	0	0	0	0	0						0	1	18	39	8.6	9.51821	2.5
560	1	38	0	3	1	0	0	0	1	1	1	0	29.38	6.6	7.7	6.9	7.6	7.6	78	133	237	66	40	70.0729	22	0	1	0	0	1	0	0	0	1	0						1	1	13.3	23.7	4	7.00729	2.2
561	0	49	0	2	1	0	0	0	1	1	1	0	24.3	6.6	6.8	6.3	6.8	6.9	83.6667	181	163	45	112	156.066	83	0	1	1	0	2	0	0	0	0	0						0	2	18.1	16.3	11.2	15.6066	8.3
562	0	38	1	2	0	0	0	0	1	1	1	1	31.59	6.9	6.5	6.6	7.3	6.5	98	176	88	47	111	67.4026	48	0	1	0	0	1	0	0	0	0	0						0	1	17.6	8.8	11.1	6.74026	4.8
563	0	54	0	3	1	0	0	2	1	1	1	1	28.4	6.7	6.8	6.7	6.7	6.8	87	231	125	53	151	169.263	48	0	1	1	1	1	0	0	0	0	0						0	1	23.1	12.5	15.1	16.9263	4.8
564	1	62	0	0	0	0	0	0	1	#NULL!	#NULL!	0	21.01	5.7	5.7	6.1	6.1	7.3	103.333	205	382	46	101	72.8345	40	0	1	1	1	1	0	0	0	0	0						1	1	20.5	38.2	10.1	7.28345	4
565	0	38	1	3	1	0	0	0	1	1	1	0	25.19	7.2	6.6	6.3	6.1	6.1	98.3333	216	117	40	166	132.755	48	0	1	1	0	1	0	0	0	0	0						0	2	21.6	11.7	16.6	13.2755	4.8
566	0	52	0	2	1	0	0	0	1	0	0	0	25.96	7.6	6.5	7	7	6.8	114.667	219	194	49	138	75.323	68	0	1	1	0	1	0	0	0	0	0						0	1	21.9	19.4	13.8	7.5323	6.8
567	1	34	1	2	1	1	0	0	1	0	0	0	24.53	6.6	6.5	7.6	6.7	8	85.6667	195	176	43	123	74.6627	16	0	0	0	0	2	0	0	0	0	0						1	1	19.5	17.6	12.3	7.46627	1.6
568	0	57	1	2	1	0	0	1	1	0	1	0	35.56	7.7	7	6.9	7	7	88.6667	181	255	34	94	116.239	38	0	1	0	0	4	1	0	0	0	0						0	2	18.1	25.5	9.4	11.6239	3.8
569	0	60	0	1	1	0	0	2	1	1	1	0	24.9	6.3	6	6.3	6.3	5.9	91.3333	247	108	77	144	123.008	63	0	0	1	0	1	0	0	0	0	0						0	1	24.7	10.8	14.4	12.3008	6.3
570	0	45	0	3	0	0	0	1	1	#NULL!	#NULL!	1	31.57	7	6.1	6.1	5.6	6.2	93.3333	184	187	63	91	111.92	73	0	1	0	0	4	1	0	0	0	0						0	2	18.4	18.7	9.1	11.192	7.3
571	0	50	0	3	1	0	0	0	1	0	1	0	30.79	6.7	6.7	5.4	5.8	6.3	89	210	97	94	110	127.618	16	0	0	0	0	1	0	0	0	0	0						0	1	21	9.7	11	12.7618	1.6
572	0	61	0	1	0	0	0	2	1	1	1	0	24.87	7.4	6.5	6.5	6.4	6.9	99	189	201	41	107	125.43	56	0	1	0	0	1	0	0	0	0	0						0	2	18.9	20.1	10.7	12.543	5.6
573	0	61	0	2	1	0	0	2	1	1	1	0	27.82	5.7	5.9	5.7	5.7	5.8	97.6667	154	91	45	88	87.96	20	0	1	1	0	1	0	1	0	0	0						0	2	15.4	9.1	8.8	8.796	2
574	0	63	0	1	0	0	0	2	1	1	1	0	25.54	7	5.5	5.5	5.5	5.2	93.6667	235	130	64	159	124.61	62	0	1	1	0	2	0	0	0	0	0						0	1	23.5	13	15.9	12.461	6.2
575	0	62	0	1	0	0	0	0	1	1	1	1	24.3	6.4	6.6	7.6	6.7	6.5	86.6667	143	60	49	70	93.72	17	0	0	1	0	1	0	1	0	0	0						0	1	14.3	6	7	9.372	1.7
576	0	52	0	1	0	0	0	0	1	1	1	0	24.24	5.9	5.5	6.1	5.7	6	97.6667	279	369	39	179	75.4552	20	0	0	1	1	2	0	0	0	0	0						0	1	27.9	36.9	17.9	7.54552	2
577	0	48	0	1	0	0	0	0	1	0	1	0	28.84	7.9	7.9	5.6	5.6	5.8	112	193	356	35	107	110.404	54	0	0	0	0	1	0	0	0	0	0						0	1	19.3	35.6	10.7	11.0404	5.4
578	0	53	0	1	0	0	0	0	1	0	1	0	29.63	6.4	6.6	6.1	6	6	86.3333	206	153	49	128	65.4965	92	0	1	0	0	2	0	0	0	0	0						0	1	20.6	15.3	12.8	6.54965	9.2
579	1	45	0	2	1	0	0	0	1	0	1	1	26.84	6	6	6.7	6.5	7.4	77.6667	164	195	42	93	121.54	20	0	0	0	0	2	0	0	0	0	0						1	2	16.4	19.5	9.3	12.154	2
580	1	50	1	3	0	1	1	0	1	1	1	0	24.84	7.1	6.5	7.1	6.8	7.5	105	95	53	29	53	76.3104	13	0	1	0	0	1	0	0	1	0	0						1	1	9.5	5.3	5.3	7.63104	1.3
581	0	45	1	3	1	0	1	1	1	1	1	0	19.3	6	7.3	7.9	7.5	6	122.667	180	321	50	72	104.537	87	0	1	0	0	2	0	0	0	0	0						0	1	18	32.1	7.2	10.4537	8.7
582	0	45	0	3	1	0	0	1	1	1	1	1	39.8	6	5.9	5.7	5.4	5.8	101	162	144	38	104	57.3	39	0	1	1	0	1	0	0	0	0	0						0	2	16.2	14.4	10.4	5.73	3.9
583	1	42	0	2	1	0	0	0	1	1	1	0	22.39	7.4	7.3	7	7	7.2	64.6667	169	78	54	95	91.7655	22	0	0	0	0	4	0	0	0	0	0						1	1	16.9	7.8	9.5	9.17655	2.2
584	0	47	0	2	0	0	0	1	1	1	1	1	22.51	5.5	5.6	5.5	5.3	5.4	84.6667	142	57	46	88	116.037	15	0	1	1	0	1	0	0	0	0	0						0	2	14.2	5.7	8.8	11.6037	1.5
585	1	46	1	2	1	0	0	1	1	0	1	0	25.78	7.6	6.8	6.8	7.4	7.5	90.6667	211	151	46	139	77.596	43	0	0	1	0	1	0	0	0	0	0						1	1	21.1	15.1	13.9	7.7596	4.3
586	0	49	0	2	0	0	0	0	1	1	1	0	22.7	7.3	6.8	6.3	6.5	6.7	102.667	192	240	48	112	88.9383	21	0	1	0	0	1	0	0	0	0	0						0	1	19.2	24	11.2	8.89383	2.1
587	1	43	0	2	1	0	0	2	1	1	1	0	25.09	7.2	8.5	7.7	8.4	8.2	83.6667	188	79	74	88	91.3282	46	2	1	1	0	3	1	1	0	0	0						1	1	18.8	7.9	8.8	9.13282	4.6
588	0	48	0	1	1	0	0	0	1	0	1	0	28.38	5.6	6.1	5.7	5.6	5.6	92	184	145	47	111	58.9294	65	0	1	1	0	3	0	0	0	0	0						0	1	18.4	14.5	11.1	5.89294	6.5
589	0	57	0	1	1	0	0	0	1	#NULL!	#NULL!	1	23.51	6.7	6.5	6.1	6.4	6.2	99.3333	158	213	37	85	130.171	25	0	0	1	0	2	0	0	0	0	0						0	2	15.8	21.3	8.5	13.0171	2.5
590	0	58	0	1	1	0	0	0	1	0	1	0	25.3	6.5	5.4	5.4	5.8	5.9	123.667	209	110	58	126	64.3088	40	0	1	1	0	2	0	1	0	0	0						0	1	20.9	11	12.6	6.43088	4
591	0	38	0	2	1	0	0	2	1	1	1	1	23.15	6.4	6.1	5.9	5.8	6.2	100.667	159	63	34	101	183.93	12	0	0	1	0	2	0	0	0	0	0						0	1	15.9	6.3	10.1	18.393	1.2
592	0	62	0	0	0	0	0	0	1	0	1	0	31.82	7	6.4	6.8	6.8	6.5	91	213	736	47	81	72.681	20	0	1	1	0	3	0	1	0	0	0						0	1	21.3	73.6	8.1	7.2681	2
593	0	51	0	1	1	0	0	0	1	0	1	0	25.44	6.3	6.6	6.8	6.6	6.7	103.333	151	116	41	91	123.83	33	0	0	1	0	3	0	0	0	0	0						0	2	15.1	11.6	9.1	12.383	3.3
594	1	46	1	1	1	1	1	0	1	1	1	1	29.27	7.2	7.1	7.9	8	7.2	119	185	215	41	112	83.9578	26	0	1	0	0	1	0	0	0	0	0						1	2	18.5	21.5	11.2	8.39578	2.6
595	0	60	1	1	0	1	1	0	1	1	1	0	37.66	6.8	5.7	5.9	5.9	5.8	87.6667	152	258	42	71	96.1356	24	0	0	0	0	1	0	0	0	0	0						0	1	15.2	25.8	7.1	9.61356	2.4
596	0	46	1	3	0	0	0	2	1	1	1	1	27.8	5.9	5.4	5.3	5.5	5.7	80.3333	178	67	46	114	104.07	21	0	0	1	0	2	0	0	0	0	0						0	2	17.8	6.7	11.4	10.407	2.1
597	0	54	0	3	1	0	0	0	1	1	0	0	23.59	7.9	6.6	6.9	6.8	6.5	87.6667	188	157	66	87	128.574	18	0	1	1	0	1	0	0	0	0	0						0	1	18.8	15.7	8.7	12.8574	1.8
598	0	63	1	1	0	0	0	0	1	#NULL!	#NULL!	0	26.35	5.6	5.7	6.7	6.7	6.4	109.667	117	56	45	67	67.3932	27	0	1	0	0	4	0	0	1	0	0						0	1	11.7	5.6	6.7	6.73932	2.7
599	0	53	0	3	0	0	0	1	1	1	1	1	23.6	4.6	4.5	4.7	5.2	4.9	93	138	81	44	70	157.23	14	0	1	0	0	1	0	0	0	0	0						0	2	13.8	8.1	7	15.723	1.4
600	0	56	0	1	0	0	0	0	1	0	0	0	33.95	5.9	5.3	5.3	6.2	6.2	102.333	146	178	48	75	57.1478	42	0	0	0	0	1	0	0	0	0	0						0	1	14.6	17.8	7.5	5.71478	4.2
601	0	48	1	2	1	0	1	2	0	0	1	1	22.05	6.2	5.7	5.8	5.5	5.8	92.6667	158	249	45	80	110.662	28	0	0	0	0	1	0	0	0	0	0						0	1	15.8	24.9	8	11.0662	2.8
602	1	47	1	1	0	1	1	1	1	1	0	0	25.81	5	6	6.4	7.2	7.7	81.3333	178	85	69	75	103.618	51	2	0	0	0	4	0	0	0	0	0						1	1	17.8	8.5	7.5	10.3618	5.1
603	0	57	1	1	0	0	0	0	1	0	1	0	27.41	6.7	6.4	6.4	5.7	6.1	140	191	268	35	120	61.4755	22	0	1	0	0	1	0	0	0	0	0						0	1	19.1	26.8	12	6.14755	2.2
604	0	42	1	2	1	1	1	0	1	1	1	0	31.27	7.8	6.5	5.4	5.8	5.7	116.667	167	187	49	84	119.717	26	0	1	1	0	1	0	0	0	0	0						0	2	16.7	18.7	8.4	11.9717	2.6
605	0	48	1	2	1	0	1	2	1	1	1	0	28	5.5	5.2	5.2	5.2	5.5	117.667	159	171	32	92	74.6154	66	0	1	0	0	1	0	0	0	0	0						0	1	15.9	17.1	9.2	7.46154	6.6
606	0	50	0	2	0	0	0	1	1	1	1	0	39.48	5.6	5.6	5.6	5.6	5.7	98.6667	194	293	38	121	54.06	23	0	1	0	0	4	0	0	0	0	0						0	2	19.4	29.3	12.1	5.406	2.3
607	1	64	1	1	0	0	0	0	1	1	1	0	24.14	6.9	6.9	7.4	9.5	8.5	93	222	640	28	94	115.439	43	0	1	1	0	3	1	0	0	0	0						1	2	22.2	64	9.4	11.5439	4.3
608	0	52	1	1	1	0	0	0	0	1	1	0	21.42	6.6	6.6	6.6	6.8	6.8	86.6667	244	83	53	165	78.1646	18	0	0	1	0	1	0	0	0	0	0						0	1	24.4	8.3	16.5	7.81646	1.8
609	0	44	1	2	0	0	0	0	1	0	1	0	26.68	6.8	6.8	6.1	5.9	5.5	126.333	213	149	48	140	87.2764	38	0	0	1	0	2	0	0	0	0	0						0	1	21.3	14.9	14	8.72764	3.8
610	1	64	0	0	0	0	0	2	1	0	1	0	30.04	6.7	6.6	7.2	7.2	7.2	91	231	225	51	135	71.9871	234	0	1	1	0	3	0	0	0	0	0						1	1	23.1	22.5	13.5	7.19871	23.4
611	0	49	1	2	1	0	0	2	1	1	1	0	28.54	6.6	6.3	6.5	7.3	6.4	113.667	180	127	42	113	65.9873	29	0	1	1	0	1	0	0	0	0	0						0	2	18	12.7	11.3	6.59873	2.9
612	0	45	0	2	0	0	0	0	1	0	1	0	30.76	7.3	9.2	9.2	8.4	6.8	85.3333	342	394	55	232	53.7122	92	0	1	1	0	1	0	0	0	0	0						0	1	34.2	39.4	23.2	5.37122	9.2
613	0	51	1	2	1	0	0	1	1	1	1	0	29.73	5.7	5.8	5.5	5.6	5.3	101.667	189	94	40	138	127.367	39	0	1	0	0	1	0	0	0	0	0						0	2	18.9	9.4	13.8	12.7367	3.9
614	0	52	1	2	1	0	0	0	1	1	1	0	31.22	6.6	6.8	6.7	6.2	6.2	88.3333	156	104	48	94	174.61	33	0	1	1	0	1	0	0	0	0	0						0	2	15.6	10.4	9.4	17.461	3.3
615	0	48	1	2	1	0	0	2	1	1	1	1	28.3	7.1	6.9	7.5	7.5	7	90.6667	176	172	34	124	133.479	28	0	0	1	1	1	0	0	0	0	0						0	2	17.6	17.2	12.4	13.3479	2.8
616	0	62	1	2	0	0	0	2	1	1	1	0	23.39	7.6	6.7	6.3	6.4	6.2	103.667	157	121	40	84	82.4131	20	0	0	1	0	1	0	0	0	0	0						0	2	15.7	12.1	8.4	8.24131	2
617	1	44	0	2	0	0	0	0	1	0	1	0	42.06	7.1	8	7.8	8.1	7.9	99.6667	156	173	39	84	77.9211	23	0	1	1	0	2	0	0	0	0	0						1	1	15.6	17.3	8.4	7.79211	2.3
618	0	47	1	1	0	0	0	0	1	0	1	0	28.34	4.7	4.7	4.7	5.1	5.6	103	174	155	37	106	64.6206	22	0	1	0	0	3	0	0	0	0	0						0	1	17.4	15.5	10.6	6.46206	2.2
619	0	58	1	0	0	1	1	1	1	0	1	0	20.79	6.2	5.8	6.2	6.1	5.9	95	147	78	38	97	115.428	28	0	0	0	0	3	0	0	1	0	0						0	1	14.7	7.8	9.7	11.5428	2.8
620	0	56	1	2	0	0	0	2	1	0	1	0	31.43	6.9	7	6.8	6.4	6.5	95.6667	186	204	46	117	48.7613	32	0	1	1	1	1	0	1	0	0	0						0	1	18.6	20.4	11.7	4.87613	3.2
621	1	40	1	3	0	0	0	2	1	1	0	0	41.48	7.6	6.4	7.1	7.5	7.9	98.3333	158	84	34	106	135.376	45	0	1	1	0	1	0	0	0	0	0						1	2	15.8	8.4	10.6	13.5376	4.5
622	0	42	1	2	1	1	1	0	1	1	1	1	28.19	6.5	6	5.9	5.7	5.8	91.6667	175	346	32	88	86.5269	22	0	0	0	1	1	0	0	0	0	0						0	2	17.5	34.6	8.8	8.65269	2.2
623	0	50	0	0	1	0	0	2	1	1	1	0	34.97	6.5	6.3	6.5	6.8	7	123.667	140	65	43	91	88.5743	21	0	0	0	0	3	0	1	0	0	0						0	1	14	6.5	9.1	8.85743	2.1
624	1	33	1	3	1	1	0	1	1	0	0	0	23.03	6.6	6.5	6.2	6.9	8.3	99	154	136	48	92	75.1105	39	0	0	1	0	2	0	0	0	0	0						1	1	15.4	13.6	9.2	7.51105	3.9
625	1	49	0	2	1	0	0	1	1	1	1	0	26.53	7	7.8	7.9	7.7	7.1	108.667	220	140	57	129	88.9383	16	0	0	1	0	2	0	0	0	0	0						1	1	22	14	12.9	8.89383	1.6
626	0	45	0	3	0	0	0	0	1	1	1	1	28.1	5.9	5.5	4.5	5.2	6.1	117.333	161	63	52	98	77.5665	32	0	0	0	0	1	0	0	0	0	0						0	2	16.1	6.3	9.8	7.75665	3.2
627	0	43	1	2	0	0	0	2	1	1	1	0	28.41	7.9	7.1	6.1	6.1	6.7	103	184	175	45	120	73.83	20	0	0	0	0	1	0	0	0	0	0						0	2	18.4	17.5	12	7.383	2
628	0	61	1	1	0	0	1	0	1	1	1	0	22.32	4.3	5.4	5.4	5	5.5	89.3333	153	58	59	75	85.7868	25	0	1	0	0	2	0	0	0	0	0						0	1	15.3	5.8	7.5	8.57868	2.5
629	0	44	1	2	1	0	0	0	1	0	1	0	28.6	6.8	5.3	6.1	6.1	6.3	89.3333	158	141	44	85	72.7194	77	0	1	0	0	1	0	0	0	0	0						0	1	15.8	14.1	8.5	7.27194	7.7
630	0	63	1	1	0	1	0	#NULL!	0	#NULL!	#NULL!	0	24.17	6.8	6.6	6.9	6.9	6.6	87.3333	170	139	32	102	85.2268	275	0	0	0	0	4	0	0	0	0	0						0	1	17	13.9	10.2	8.52268	27.5
631	0	46	0	1	0	0	0	2	1	1	1	0	24.67	6.5	6.2	6.4	6.2	6.3	103	191	119	45	117	126.95	13	0	1	1	0	1	0	0	0	0	0						0	2	19.1	11.9	11.7	12.695	1.3
632	0	59	1	2	0	0	0	0	1	1	1	0	18.13	7.4	7.7	7.4	7.4	6.2	90.6667	165	47	68	86	68.5154	27	2	0	0	0	3	0	0	0	0	0						0	1	16.5	4.7	8.6	6.85154	2.7
633	0	50	0	1	1	0	0	0	1	0	1	0	25.09	6	6.6	6.2	5.9	5.9	115.333	235	175	57	145	75.6205	14	0	1	1	0	3	0	0	0	0	0						0	1	23.5	17.5	14.5	7.56205	1.4
634	0	33	0	3	1	0	0	1	1	1	0	1	19.53	6.6	7	6.4	6.4	6	91	153	37	50	97	119.07	15	0	0	0	0	1	0	0	0	0	0						0	1	15.3	3.7	9.7	11.907	1.5
635	1	36	1	1	1	0	0	0	1	#NULL!	#NULL!	0	28.05	3.4	5.4	5.7	6.9	7.3	103.667	253	253	39	145	95.4801	65	1	0	1	1	1	0	0	0	0	0						1	1	25.3	25.3	14.5	9.54801	6.5
636	0	53	1	2	1	0	1	2	1	1	1	1	27.68	7.3	5.9	5.9	5.9	6	89.6667	174	156	43	102	89.4157	23	0	0	0	0	1	0	0	0	0	0						0	2	17.4	15.6	10.2	8.94157	2.3
637	0	41	1	3	0	0	0	2	1	1	1	1	27.2	7	7	6.2	7.2	6.5	89	132	133	24	86	82.9	34	0	0	0	0	2	0	0	0	0	0						0	2	13.2	13.3	8.6	8.29	3.4
638	1	45	1	2	0	0	0	1	1	1	1	1	20.58	6.9	8.1	7.6	7.7	8	100.667	126	127	41	66	142.94	38	1	0	0	0	1	0	0	0	0	0						1	2	12.6	12.7	6.6	14.294	3.8
639	1	59	0	0	1	0	0	0	1	0	1	0	40.08	6.4	6.9	8.9	7.3	7.3	121.667	227	188	49	149	45.9816	25	0	1	1	0	4	0	0	0	0	0						1	1	22.7	18.8	14.9	4.59816	2.5
640	0	50	0	1	1	0	0	0	1	1	1	0	29.24	6.7	7.8	7.8	6.7	6.8	101.667	172	90	47	95	66.2758	53	0	1	0	0	2	0	0	0	0	0						0	1	17.2	9	9.5	6.62758	5.3
641	0	61	1	1	0	0	1	2	1	1	1	0	28.06	7.6	7.2	7.2	7.1	6.7	93.6667	177	122	48	108	75.9654	104	0	1	1	0	2	0	0	0	0	0						0	2	17.7	12.2	10.8	7.59654	10.4
642	1	35	0	3	0	0	0	0	1	1	1	1	35.84	7.4	5.8	5.8	9.7	9.7	86	155	168	39	93	136.45	22	1	0	0	0	1	0	0	0	0	0						1	2	15.5	16.8	9.3	13.645	2.2
643	0	57	0	2	0	0	0	0	1	1	1	0	31.71	6.2	6.7	6.4	6.6	6.7	101	206	124	58	112	73.93	21	2	1	0	0	2	1	0	0	0	0						0	2	20.6	12.4	11.2	7.393	2.1
644	0	53	0	1	0	0	0	0	1	0	1	0	23.61	6.9	6.8	6.5	7	7	97.3333	156	101	55	86	126.126	15	0	0	0	0	1	0	0	0	0	0						0	1	15.6	10.1	8.6	12.6126	1.5
645	1	43	0	2	0	1	0	0	1	0	1	0	25.35	7.7	8.1	7.6	8.3	10.1	97	165	269	34	95	109.109	149	0	1	0	1	2	0	0	0	0	0						1	1	16.5	26.9	9.5	10.9109	14.9
646	0	49	0	1	0	0	0	0	1	0	0	0	35.46	6.7	6.4	6.2	6.2	6.2	96	169	70	48	101	88.9383	36	0	1	0	0	1	0	0	0	0	0						0	1	16.9	7	10.1	8.89383	3.6
647	0	53	1	1	0	0	0	2	1	#NULL!	#NULL!	0	22.3	5.2	5.5	5.5	5.6	5.9	83.3333	170	32	73	95	91.4444	31	0	0	0	0	1	0	0	0	0	0						0	1	17	3.2	9.5	9.14444	3.1
648	0	58	0	1	1	0	0	0	1	#NULL!	#NULL!	0	33.27	7.2	6.9	5.9	5.9	5.9	99.6667	189	160	48	117	92.8593	25	0	1	1	0	2	0	0	0	0	0						0	1	18.9	16	11.7	9.28593	2.5
649	1	38	0	1	0	0	0	0	0	0	1	0	28.19	6.7	7.1	6.7	7.3	7.7	92.6667	227	148	48	149	79.8528	19	0	1	0	0	1	0	0	0	0	0						1	1	22.7	14.8	14.9	7.98528	1.9
650	0	55	1	3	0	0	0	0	1	0	0	0	25.16	5.7	5.9	6.2	5.9	6.1	86.3333	334	425	58	184	62.6298	37	0	0	1	0	1	0	0	0	0	0						0	1	33.4	42.5	18.4	6.26298	3.7
651	0	35	1	2	0	0	0	0	0	1	1	0	30.1	6.2	6.3	6.5	6.8	6.3	92.6667	199	269	38	117	62.4623	38	0	0	1	1	2	0	0	0	0	0						0	1	19.9	26.9	11.7	6.24623	3.8
652	1	64	1	1	1	1	0	2	1	1	1	0	31.76	7.2	7.2	8.5	9.4	8.9	113.667	195	405	44	106	84.9547	36	2	1	0	1	2	0	0	0	0	0						1	1	19.5	40.5	10.6	8.49547	3.6
653	0	50	1	1	0	1	0	1	1	0	1	0	28.92	7	5.2	5.4	6.6	6.3	82.6667	275	168	32	215	94.1317	27	0	0	1	0	1	0	0	0	0	0						0	1	27.5	16.8	21.5	9.41317	2.7
654	0	53	1	2	0	0	0	0	1	1	1	0	24.47	6.5	6.2	6.4	6.4	6.3	93.3333	145	103	49	75	81.2917	20	0	0	0	1	2	0	0	0	0	0						0	2	14.5	10.3	7.5	8.12917	2
655	0	58	1	1	1	0	0	1	1	1	1	0	34.79	7.6	6.3	6.6	6.4	6.3	96	167	250	30	92	63.807	43	0	0	0	1	2	0	0	0	0	0						0	1	16.7	25	9.2	6.3807	4.3
656	0	45	0	3	1	0	0	2	1	1	1	1	30.16	7.3	6.9	6.7	6.2	5.9	86	177	70	49	102	99.9	19	0	0	0	0	2	0	0	0	0	0						0	2	17.7	7	10.2	9.99	1.9
657	1	43	1	2	1	0	0	0	1	1	1	1	25.95	6.9	6.4	6.4	7.3	7.1	101	176	407	35	86	79.3401	17	0	1	1	1	1	0	0	0	0	0						1	1	17.6	40.7	8.6	7.93401	1.7
658	0	44	0	2	1	0	0	0	1	1	1	1	21.37	7.1	5.5	5.8	6.1	5.8	140	154	164	68	60	92.4249	18	0	0	1	0	2	1	1	0	0	0						0	2	15.4	16.4	6	9.24249	1.8
659	0	64	0	0	0	0	0	0	1	0	0	0	29.94	6.6	6.2	5.9	6.5	6.4	103	250	138	63	160	62.8383	14	0	1	1	0	1	0	0	1	0	0						0	1	25	13.8	16	6.28383	1.4
660	1	51	0	1	1	0	0	0	1	1	1	0	31.6	6.4	6	6.1	6.7	7.2	105.333	196	283	48	105	109.062	66	0	1	1	0	3	1	1	0	0	0						1	1	19.6	28.3	10.5	10.9062	6.6
661	0	35	1	3	1	0	0	0	1	0	1	0	21.97	6.1	6.7	6.7	6.8	6.7	87.3333	182	48	49	115	85.0339	21	0	0	0	0	1	0	0	0	0	0						0	1	18.2	4.8	11.5	8.50339	2.1
662	1	38	0	3	1	0	0	0	1	1	1	0	24.96	6	5.9	6.7	6.6	7.1	90.6667	165	208	62	67	111.882	23	0	0	0	0	1	0	0	0	0	0						1	1	16.5	20.8	6.7	11.1882	2.3
663	1	36	0	1	1	0	0	2	1	1	1	0	27.35	7.9	6.3	6.7	7.5	7.9	99	204	60	45	153	93.1452	13	0	0	1	0	3	0	0	0	0	0						1	2	20.4	6	15.3	9.31452	1.3
664	0	52	1	1	1	1	1	0	0	0	0	0	24.02	6.9	6.6	6.6	6.6	5.9	105.333	203	83	61	123	101.122	31	0	0	1	0	1	0	0	0	0	0						0	1	20.3	8.3	12.3	10.1122	3.1
665	0	56	1	2	1	0	1	2	1	1	1	0	29.55	5.6	5.6	5.6	5.5	5.4	109.667	179	395	42	87	44.9367	22	0	1	0	1	2	1	0	1	0	0						0	1	17.9	39.5	8.7	4.49367	2.2
666	0	57	0	1	1	0	0	2	1	1	1	0	19.33	6	6	5.9	6.1	6.1	76.6667	187	32	69	103	150.81	15	0	1	0	0	2	1	0	0	0	0						0	2	18.7	3.2	10.3	15.081	1.5
667	0	64	1	1	0	0	0	2	1	1	1	1	23.59	5.8	6.6	6.4	6.4	6.3	88	178	95	35	128	62.76	17	0	1	0	0	1	0	0	0	0	0						0	2	17.8	9.5	12.8	6.276	1.7
668	0	56	1	2	0	0	0	0	1	1	1	0	26.74	5.7	5.9	7.1	7.6	6.5	95	161	102	38	102	74.5976	39	0	1	0	0	1	0	0	0	0	0						0	1	16.1	10.2	10.2	7.45976	3.9
669	0	49	1	3	1	1	0	1	1	1	1	1	24.72	7.6	5.1	5	5.3	5.3	98	251	285	45	168	151.93	19	0	0	1	1	1	0	0	0	0	0						0	2	25.1	28.5	16.8	15.193	1.9
670	0	48	0	2	0	0	0	0	1	0	0	0	30.39	7.4	7.1	7.1	6.9	6.9	79	223	143	52	126	66.8273	20	0	0	0	0	1	0	0	0	0	0						0	1	22.3	14.3	12.6	6.68273	2
671	0	36	0	2	1	0	0	2	1	1	1	0	35.42	6.8	6	6	6	5.9	93.3333	212	223	45	138	94.6824	103	0	1	0	1	1	0	0	0	0	0						0	1	21.2	22.3	13.8	9.46824	10.3
672	0	62	0	1	0	0	0	0	1	1	1	0	24.81	6.5	7.4	6.9	7	6.6	112.667	162	134	48	88	131.049	26	0	0	1	0	1	0	0	0	0	0						0	2	16.2	13.4	8.8	13.1049	2.6
673	0	62	0	2	0	0	0	0	1	0	1	1	24.33	6.1	6.6	6.2	6.1	5.8	103.333	193	115	47	128	103.28	21	0	1	1	0	2	0	0	0	0	0						0	2	19.3	11.5	12.8	10.328	2.1
674	0	53	0	2	1	0	0	0	1	1	1	0	20.09	6.9	7	7.1	6.8	6.7	81.3333	160	75	85	57	162.951	36	0	0	1	0	2	0	0	0	0	0						0	2	16	7.5	5.7	16.2951	3.6
675	0	63	1	2	1	1	0	2	1	1	0	0	24.59	6.8	6.6	6.4	6.2	5.9	93.3333	171	137	36	97	105.18	260	0	1	0	0	2	0	0	0	0	0						0	2	17.1	13.7	9.7	10.518	26
676	0	41	0	2	1	0	0	0	1	1	1	0	29.35	5.8	5.6	5.6	5.6	5.3	99.3333	165	70	57	92	92.2155	24	0	0	0	0	2	0	0	0	0	0						0	1	16.5	7	9.2	9.22155	2.4
677	1	51	0	1	0	0	0	2	1	0	1	0	23.81	7.2	7.6	7.6	7.2	7.1	117.333	206	39	#NULL!	121	127.109	28	0	1	1	0	1	0	0	0	0	0						1	1	20.6	3.9	12.1	12.7109	2.8
678	0	53	1	2	0	0	0	2	1	0	0	1	26.41	7.5	6.1	5.7	6.1	6.4	90.6667	157	208	33	97	94.2889	30	0	0	0	1	2	0	0	1	0	0						0	2	15.7	20.8	9.7	9.42889	3
679	0	59	0	0	1	0	0	0	1	#NULL!	#NULL!	0	29.78	6.6	6.8	6.3	6.4	6.4	93.3333	177	529	28	58	85.9455	61	0	1	0	1	2	0	0	0	0	0						0	1	17.7	52.9	5.8	8.59455	6.1
680	0	46	0	1	1	0	0	2	1	1	1	0	26.77	6.9	6.9	6.7	6.5	6.6	103	268	82	78	182	135.96	16	0	0	1	0	1	0	0	0	0	0						0	1	26.8	8.2	18.2	13.596	1.6
681	0	48	1	2	1	0	0	1	1	1	1	1	28.41	6.7	6.7	6.2	6.3	5.9	92.6667	198	208	38	131	71.4462	6	0	0	0	1	1	0	0	0	0	0						0	1	19.8	20.8	13.1	7.14462	0.6
682	1	53	0	2	0	0	0	1	1	1	0	1	22.83	7.2	7.6	8.3	7.5	7.6	105.667	142	185	39	74	77.2568	16	0	0	1	0	1	0	0	0	0	0						1	2	14.2	18.5	7.4	7.72568	1.6
683	0	34	0	2	0	0	0	1	1	0	1	0	42.88	6.5	6.5	6.5	6.5	6.5	118.333	190	85	48	125	137.95	29	0	0	0	0	1	0	0	0	0	0						0	1	19	8.5	12.5	13.795	2.9
684	0	42	1	2	1	0	0	0	1	1	1	0	28.65	5.6	6	6.1	6.2	5.6	101	122	69	48	58	92.5385	12	0	1	0	0	1	1	1	0	0	0						0	1	12.2	6.9	5.8	9.25385	1.2
685	0	63	0	1	0	0	0	0	1	0	1	0	26.25	7.7	6.3	7	6.7	6.3	120	209	88	57	130	84.5148	69	0	0	0	0	1	0	0	0	0	0						0	1	20.9	8.8	13	8.45148	6.9
686	0	64	1	2	1	0	0	1	1	1	1	0	31.39	6	5.9	5.8	5.8	5.9	88.6667	199	121	43	138	93.2755	65	0	1	0	0	4	0	0	0	0	0						0	2	19.9	12.1	13.8	9.32755	6.5
687	0	53	0	0	1	0	0	0	1	0	1	0	27.54	7	6.8	6.8	6.9	6.7	87.6667	202	127	41	140	42.685	21	0	0	1	0	1	0	0	0	0	0						0	1	20.2	12.7	14	4.2685	2.1
688	0	63	0	1	0	0	0	0	1	1	1	0	24.2	7.4	7.7	6.5	6.5	6.5	106.333	235	189	39	154	119.837	24	0	1	1	0	1	0	0	0	0	0						0	1	23.5	18.9	15.4	11.9837	2.4
689	0	57	0	0	0	0	0	0	1	0	1	0	25.98	5.7	5.7	5.7	5.8	5.7	100	190	101	52	117	103.042	14	0	1	1	0	1	0	0	0	0	0						0	1	19	10.1	11.7	10.3042	1.4
690	0	59	0	0	0	0	0	0	1	0	1	0	28.6	6.1	6.3	6.3	6.3	6.5	127.667	150	181	61	60	63.8677	33	0	1	1	0	1	0	1	0	0	0						0	1	15	18.1	6	6.38677	3.3
691	0	62	1	1	0	0	0	0	1	1	0	0	19.07	7.7	7.1	6.2	6.3	6.3	81	267	242	81	149	61.15	29	0	1	1	0	2	0	1	0	0	0						0	1	26.7	24.2	14.9	6.115	2.9
692	1	51	0	0	1	0	0	0	1	0	1	0	31.32	6.6	6.6	8.3	8.3	8.1	89.3333	214	137	63	125	109.062	30	0	1	1	0	1	0	0	0	0	0						1	1	21.4	13.7	12.5	10.9062	3
693	0	51	0	1	0	0	0	0	1	#NULL!	#NULL!	0	23.81	5.7	5.6	6.1	6.1	6.3	83.3333	179	62	62	99	65.7503	14	0	1	0	0	1	0	0	0	0	0						0	1	17.9	6.2	9.9	6.57503	1.4
694	0	49	1	2	0	1	0	1	1	1	1	0	26.01	6.2	6	6.2	6	5.6	86.6667	180	184	33	126	79.4197	24	0	0	0	0	2	0	0	0	0	0						0	1	18	18.4	12.6	7.94197	2.4
695	1	52	1	2	1	0	0	2	1	0	0	1	28.53	7.9	5.8	6.2	6.2	7.3	91.6667	203	79	80	90	116.5	45	0	0	0	0	2	0	0	0	0	0						1	2	20.3	7.9	9	11.65	4.5
696	0	54	0	1	0	0	0	2	1	1	1	0	23.5	7.2	8	6.4	6.3	5.9	104.333	176	99	64	102	107.813	25	0	0	1	0	1	0	0	0	0	0						0	1	17.6	9.9	10.2	10.7813	2.5
697	1	35	0	2	1	0	0	0	1	#NULL!	#NULL!	1	27.87	7.7	7.3	8.4	10.2	9.6	82	194	190	80	85	85.3072	22	2	0	0	0	1	0	0	0	0	0						1	2	19.4	19	8.5	8.53072	2.2
698	0	54	0	1	0	0	0	0	1	0	1	1	23.62	6.9	6.8	6.5	6.6	6.6	81	174	95	52	113	125.651	19	0	0	0	0	3	0	0	0	0	0						0	1	17.4	9.5	11.3	12.5651	1.9
699	0	50	0	0	1	0	0	0	1	0	1	0	24.55	6.3	6.2	6.2	6.6	6.9	82	138	222	28	69	95.677	32	0	0	1	1	2	0	0	0	0	0						0	1	13.8	22.2	6.9	9.5677	3.2
700	0	43	1	1	1	1	0	1	1	1	1	0	21.5	5.7	5.5	6.1	6	6.2	113	161	58	67	85	60.2495	10	0	0	0	0	1	0	0	0	0	0						0	1	16.1	5.8	8.5	6.02495	1
701	0	57	1	3	1	0	0	2	1	1	1	1	21.24	6	6.2	5.9	6.2	5.7	81.6667	191	46	63	114	70.22	18	0	0	0	0	1	0	0	0	0	0						0	2	19.1	4.6	11.4	7.022	1.8
702	0	63	0	0	0	0	0	0	1	0	1	0	30.18	7.4	7.4	6.7	6.6	6.6	97	232	72	62	161	91.3259	55	0	1	0	0	1	0	0	0	0	0						0	1	23.2	7.2	16.1	9.13259	5.5
703	0	51	1	1	0	1	1	0	1	0	0	1	24.28	6.5	6.5	6.6	6.2	6	88.6667	152	88	52	86	62.8565	39	0	1	0	0	2	0	0	0	1	0						0	1	15.2	8.8	8.6	6.28565	3.9
704	0	64	0	1	1	0	0	1	1	1	1	1	26.56	6.9	6.7	6.5	6.1	6.1	89.3333	141	91	56	62	79.0122	17	0	1	1	0	2	1	1	0	0	0						0	2	14.1	9.1	6.2	7.90122	1.7
705	0	42	1	3	1	0	0	0	1	1	1	0	40.23	5.2	5.3	5.3	5.1	5.1	90.3333	159	83	39	98	112.476	61	0	1	0	0	1	0	1	0	0	0						0	2	15.9	8.3	9.8	11.2476	6.1
706	0	33	1	3	1	0	0	0	1	1	1	0	29.76	6.1	6.2	7	8.3	6.1	94	221	249	48	140	85.5358	45	0	0	1	0	2	0	0	0	0	0						0	1	22.1	24.9	14	8.55358	4.5
707	0	52	1	2	0	1	0	2	1	1	1	1	21.07	5.2	5.5	5.9	6.2	6.5	94.3333	154	259	37	76	106.091	21	0	0	0	1	3	0	0	1	0	0						0	1	15.4	25.9	7.6	10.6091	2.1
708	0	58	1	2	0	0	0	0	1	1	1	0	27.5	6.5	6	6	6.8	6.7	98.6667	129	59	44	70	82.5712	43	0	0	1	0	3	0	0	1	0	0						0	1	12.9	5.9	7	8.25712	4.3
709	0	53	1	2	1	0	1	2	1	0	1	0	27.92	7.9	7	5.9	5.7	5.8	105.667	197	242	62	118	78.1646	20	0	0	0	1	1	0	0	0	0	0						0	1	19.7	24.2	11.8	7.81646	2
710	0	44	0	1	1	0	0	0	1	0	1	0	23.81	7.7	6.8	6.6	7	6.9	85.6667	235	98	49	168	77.5665	28	0	0	1	0	1	0	0	0	0	0						0	1	23.5	9.8	16.8	7.75665	2.8
711	1	45	1	3	1	0	0	2	1	1	1	0	24.17	7.4	6.9	7.4	7.4	7.4	99	136	85	47	74	148.55	26	0	1	1	0	2	0	1	0	0	0						1	2	13.6	8.5	7.4	14.855	2.6
712	0	55	0	2	0	0	0	1	1	1	1	0	25.18	7.4	6.5	6.6	6.4	6.3	99.3333	197	148	43	119	114.75	45	0	1	0	0	1	0	0	0	0	0						0	2	19.7	14.8	11.9	11.475	4.5
713	1	51	1	2	0	1	1	0	1	0	1	0	29.27	6.1	6.4	6.4	6.3	7.6	110.333	130	267	39	62	57.9694	28	0	1	1	1	1	0	0	0	0	0						1	1	13	26.7	6.2	5.79694	2.8
714	0	64	0	1	1	0	0	1	1	0	1	0	25.26	7.5	6.3	7.5	7.5	6.5	81.3333	139	105	55	67	104.663	15	0	1	1	0	2	1	0	0	0	0						0	2	13.9	10.5	6.7	10.4663	1.5
715	0	45	0	2	1	0	0	0	1	0	1	0	29.9	7.9	6.6	6.2	5.8	6	103.667	183	107	43	123	67.7086	13	0	1	1	0	1	1	1	0	0	0						0	1	18.3	10.7	12.3	6.77086	1.3
716	0	58	1	1	0	0	0	0	1	0	1	0	25.86	7.2	6.2	6	6.1	5.6	99	158	266	37	77	68.7535	43	0	1	0	1	1	0	0	0	0	0						0	1	15.8	26.6	7.7	6.87535	4.3
717	0	62	1	2	1	0	0	2	1	1	1	1	22.83	5.8	6.2	5.7	6.1	6	106	139	76	35	84	77.9132	15	0	1	0	0	2	1	0	0	0	0						0	2	13.9	7.6	8.4	7.79132	1.5
718	1	42	0	2	1	0	0	0	1	1	1	0	26.61	6.9	6.6	7.2	7.4	8.5	133.333	220	220	47	137	91.7655	17	0	1	1	0	1	0	0	0	0	0						1	1	22	22	13.7	9.17655	1.7
719	0	43	0	2	1	0	0	0	1	0	0	0	24.88	7	6.7	6.3	6.4	6.8	95.6667	174	94	42	101	91.3282	30	0	0	0	0	1	0	0	0	0	0						0	1	17.4	9.4	10.1	9.13282	3
720	1	61	0	1	0	0	0	0	1	0	1	0	21.08	7.7	6.9	7.3	8.2	8.4	95.6667	174	102	53	101	72.681	40	0	1	0	0	3	0	0	0	0	0						1	1	17.4	10.2	10.1	7.2681	4
721	0	64	0	1	1	0	0	2	0	1	1	0	30.38	7.2	5.7	5.7	6.7	6.7	80.6667	168	147	49	84	113.659	102	0	0	0	0	2	0	0	0	0	0						0	2	16.8	14.7	8.4	11.3659	10.2
722	0	58	0	1	0	0	0	0	1	0	0	0	29.38	7.7	7.4	7.4	6.9	6.5	99.3333	207	112	60	113	106.271	46	0	1	0	0	1	0	0	0	0	0						0	1	20.7	11.2	11.3	10.6271	4.6
723	0	42	1	2	1	1	0	0	1	0	0	0	28.03	5.4	6.2	6	5.6	5.9	86	141	102	29	88	113.675	52	0	0	0	0	3	0	0	0	0	0						0	1	14.1	10.2	8.8	11.3675	5.2
724	0	49	0	2	1	0	0	0	1	1	1	0	34.45	6.3	6.5	6.2	6.5	6.5	87	204	201	53	126	100.437	28	0	1	1	0	1	0	0	0	0	0						0	2	20.4	20.1	12.6	10.0437	2.8
725	1	54	1	3	1	0	0	1	1	1	1	0	26.07	6.3	6.9	6.6	6.7	7.2	96.3333	150	74	46	88	80.35	23	0	1	1	0	1	0	0	0	0	0						1	2	15	7.4	8.8	8.035	2.3
726	0	39	1	3	1	0	0	0	1	1	1	1	34.81	7	6.9	6.9	6.7	6.8	108.667	172	128	38	114	102.142	27	0	0	0	0	1	0	0	0	0	0						0	2	17.2	12.8	11.4	10.2142	2.7
727	0	57	1	2	1	1	1	0	1	0	1	0	30.1	5.9	6.4	6.4	7.4	5.9	108	157	200	44	81	74.3336	72	0	0	0	0	2	0	0	0	0	0						0	1	15.7	20	8.1	7.43336	7.2
728	0	54	1	1	0	0	0	0	1	0	1	0	26.43	6.2	6	6.3	6.3	6.7	121	203	170	44	138	87.9359	27	0	1	1	0	3	0	0	1	0	0						0	1	20.3	17	13.8	8.79359	2.7
729	0	57	0	2	1	0	0	0	1	#NULL!	#NULL!	0	30.08	6.6	5.9	5.9	6.4	6.5	101.333	201	103	41	146	64.5362	16	0	1	1	0	1	0	0	0	0	0						0	1	20.1	10.3	14.6	6.45362	1.6
730	1	39	1	1	1	0	0	0	1	0	1	0	22.52	7.7	7.7	7.2	7.2	7.1	103.333	217	173	33	132	67.4026	35	0	1	1	0	1	0	0	0	0	0						1	1	21.7	17.3	13.2	6.74026	3.5
731	0	38	1	2	1	1	1	0	1	0	1	0	21.22	5.1	5.5	5.5	5.3	5.3	96.3333	170	105	68	88	125.548	54	0	0	0	0	1	0	0	0	1	0						0	1	17	10.5	8.8	12.5548	5.4
732	0	55	1	1	0	0	1	#NULL!	0	#NULL!	#NULL!	0	26.23	6.9	6.7	6.7	6.8	6.8	142.333	182	89	61	96	52.6154	27	0	1	0	0	1	0	0	0	0	0						0	1	18.2	8.9	9.6	5.26154	2.7
733	1	52	0	1	1	0	0	0	1	0	1	0	24.95	7.5	8.9	8.4	7	7.2	108	272	144	68	175	87.8719	34	0	0	1	0	1	0	0	0	0	0						1	1	27.2	14.4	17.5	8.78719	3.4
734	1	43	0	2	0	1	1	0	1	#NULL!	#NULL!	0	34.54	6	6.7	6.9	8.1	7.1	103.667	176	198	53	87	73.0595	65	0	0	0	0	3	0	0	0	0	0						1	1	17.6	19.8	8.7	7.30595	6.5
735	0	63	0	1	1	0	0	0	1	1	0	1	24.71	5.6	5.8	6	6	6	96.6667	139	55	60	61	58	17	0	1	1	0	3	0	0	0	1	0						0	2	13.9	5.5	6.1	5.8	1.7
736	0	63	1	1	0	0	1	0	1	1	1	1	26.08	6.9	6.2	6.4	6.2	6.4	106.333	198	122	38	139	93.57	65	0	0	1	0	1	0	0	0	0	0						0	2	19.8	12.2	13.9	9.357	6.5
737	0	63	0	0	0	0	0	0	1	0	0	0	23.74	6.1	6.4	6.5	6.5	6.5	96.3333	145	117	49	76	72.4453	15	0	1	0	0	1	1	1	0	0	0						0	1	14.5	11.7	7.6	7.24453	1.5
738	1	49	0	3	0	0	0	0	1	1	1	1	23.83	6.9	8.4	9.2	9.2	9.2	80	163	74	42	96	148.09	12	2	0	0	0	2	0	0	0	0	0						1	2	16.3	7.4	9.6	14.809	1.2
739	0	43	1	2	1	1	1	1	1	0	1	0	25.76	7.2	7.4	6.5	7.3	6.4	110.667	229	427	35	112	105.506	186	0	1	0	1	1	0	0	0	0	0						0	1	22.9	42.7	11.2	10.5506	18.6
740	0	48	1	2	0	0	0	1	1	1	1	0	26.68	7.2	7.7	7.7	7.1	6.9	93.3333	152	118	40	90	76.9371	19	0	0	0	0	2	0	0	0	0	0						0	1	15.2	11.8	9	7.69371	1.9
741	0	57	0	2	0	0	0	0	1	1	0	0	20.75	5.4	6.6	6.1	5.8	6	83	177	74	59	104	84.8491	17	0	0	0	0	2	0	0	0	0	0						0	2	17.7	7.4	10.4	8.48491	1.7
742	0	42	0	2	1	0	0	0	1	0	1	0	22.46	6.2	6.5	6.5	6.4	6.1	95.6667	195	101	52	126	68.6636	12	0	0	0	0	1	0	0	0	0	0						0	1	19.5	10.1	12.6	6.86636	1.2
743	0	49	0	1	0	0	0	0	1	1	1	0	30.17	6.8	6.2	6.4	6.6	6.4	100	187	89	73	93	96.8791	28	0	1	1	0	1	0	0	0	0	0						0	2	18.7	8.9	9.3	9.68791	2.8
744	0	41	1	2	1	1	0	0	1	1	1	0	33.71	6.6	7.1	6.8	6.3	6.8	93.3333	122	70	24	91	50.93	26	0	1	0	0	4	1	0	0	0	0						0	2	12.2	7	9.1	5.093	2.6
745	0	50	0	2	0	0	0	2	1	1	1	0	27.36	7.1	6.6	6.3	6.8	6.4	80.3333	171	162	62	85	201.661	17	0	0	1	0	1	0	0	0	0	0						0	2	17.1	16.2	8.5	20.1661	1.7
746	0	61	0	2	0	0	0	0	1	0	1	0	26.04	7.4	7.4	7.3	6.5	6.5	100	297	1086	51	84	84.7897	18	0	0	1	1	1	1	0	0	0	0						0	1	29.7	108.6	8.4	8.47897	1.8
747	0	54	1	1	0	0	0	2	1	1	1	0	27.11	6.9	6.9	6.8	6.8	6.3	118.667	271	111	74	182	76.1093	61	0	1	1	0	3	0	0	1	0	0						0	1	27.1	11.1	18.2	7.61093	6.1
748	0	58	1	2	0	0	0	0	1	0	1	0	22.27	6.8	6.8	6.6	7	7	77	169	85	55	90	76.4813	16	0	0	0	0	1	0	0	0	0	0						0	1	16.9	8.5	9	7.64813	1.6
749	1	59	0	1	0	0	0	2	1	1	0	0	33.28	6.8	8.2	9.8	6.2	7.3	88	179	272	43	97	85.356	52	0	1	0	0	1	0	0	0	0	0						1	1	17.9	27.2	9.7	8.5356	5.2
750	0	58	0	1	0	0	0	1	1	0	1	0	24.92	5.4	5.3	5.3	5.3	5.1	78.6667	189	186	51	113	123.852	57	0	1	1	0	1	0	0	0	0	0						0	1	18.9	18.6	11.3	12.3852	5.7
751	0	43	1	2	1	1	1	0	1	1	1	0	36.22	6.2	6.1	6.1	6.6	6.4	103.333	188	492	47	83	80.0929	51	0	1	1	1	2	0	0	0	0	0						0	2	18.8	49.2	8.3	8.00929	5.1
752	0	63	0	1	0	0	0	2	1	1	1	1	27.06	6.7	6.4	6.7	6.4	6.8	111	171	163	39	102	71.41	20	2	1	1	0	1	0	0	0	0	0						0	2	17.1	16.3	10.2	7.141	2
753	0	57	1	1	0	1	0	2	1	1	1	0	30.15	7.9	5.6	5.7	5.7	5.7	91.3333	161	103	37	110	56.899	39	0	0	0	0	2	0	0	0	0	0						0	1	16.1	10.3	11	5.6899	3.9
754	1	63	0	1	0	0	0	0	1	1	1	0	22	6	6.3	6.8	7.5	8.3	86.6667	183	129	41	113	140.724	22	0	0	1	0	4	1	0	0	0	0						1	2	18.3	12.9	11.3	14.0724	2.2
755	0	51	0	1	0	0	0	0	1	#NULL!	#NULL!	0	28.84	6.2	6.3	6.3	6.1	6.1	117.333	188	178	46	112	75.6205	40	0	1	0	0	1	1	0	0	0	0						0	1	18.8	17.8	11.2	7.56205	4
756	0	47	0	2	1	0	0	1	1	1	1	0	21.73	5.5	5.9	5.9	5.7	5.9	83.6667	158	230	36	93	97.7	15	0	0	0	0	1	0	0	0	0	0						0	2	15.8	23	9.3	9.77	1.5
757	1	56	0	1	0	0	0	0	0	0	1	0	35.84	6	7	6.6	6.6	7.2	100	185	149	41	117	73.9322	42	0	1	0	0	1	0	0	0	1	0						1	1	18.5	14.9	11.7	7.39322	4.2
758	0	62	1	1	1	0	0	0	1	0	1	0	29.76	5.5	5.7	5.7	5.7	6	91	154	167	38	90	75.7151	42	0	0	1	0	3	1	1	0	0	0						0	1	15.4	16.7	9	7.57151	4.2
759	0	47	1	2	1	0	0	0	1	0	0	0	24.61	7.8	6.8	6.3	6.2	6.1	88.6667	212	287	36	125	103.618	51	0	0	0	0	1	0	0	0	0	0						0	1	21.2	28.7	12.5	10.3618	5.1
760	0	44	1	2	1	1	0	0	1	#NULL!	#NULL!	0	26.55	6.5	6.4	6.3	6.3	6.3	91	146	90	50	75	81.174	67	0	0	0	0	1	0	0	1	0	0						0	1	14.6	9	7.5	8.1174	6.7
761	0	55	1	1	1	0	0	0	1	1	1	0	32.29	6.5	5.9	5.9	6.5	6.3	87	141	323	31	75	77.579	40	0	0	1	1	1	0	0	0	0	0						0	1	14.1	32.3	7.5	7.7579	4
762	0	48	1	3	0	1	0	0	1	0	1	0	28.89	7.4	6.6	6.3	6.8	6.4	98.6667	203	398	43	82	69.6825	43	0	1	1	1	1	0	0	0	0	0						0	1	20.3	39.8	8.2	6.96825	4.3
763	1	52	1	2	0	1	1	0	1	#NULL!	#NULL!	0	29.72	6	6.5	6.5	9.6	9.6	110	167	74	41	108	57.9694	138	0	0	0	0	3	0	0	1	0	0						1	1	16.7	7.4	10.8	5.79694	13.8
764	0	49	0	1	1	0	0	1	1	1	1	0	31.06	5.8	7.2	8	9	6.1	101	220	403	40	125	87.1363	28	0	1	1	0	2	0	0	0	0	0						0	1	22	40.3	12.5	8.71363	2.8
765	0	41	1	3	1	0	0	0	1	1	1	0	27.36	7.8	6.2	6.3	5.7	6.2	103.667	249	99	59	146	92.9923	43	0	1	1	0	1	0	0	0	0	0						0	1	24.9	9.9	14.6	9.29923	4.3
766	0	41	0	2	1	0	0	0	1	0	1	0	25.84	6.3	6.1	5.8	5.7	5.8	89.6667	143	133	48	79	146.03	27	0	0	1	0	2	0	0	0	0	0						0	1	14.3	13.3	7.9	14.603	2.7
767	1	47	0	1	1	0	0	0	1	1	1	0	26.16	6.8	6.6	6.8	6.6	7.3	106.333	160	82	42	99	238.933	32	0	1	0	0	1	0	0	0	0	0						1	2	16	8.2	9.9	23.8933	3.2
768	0	64	1	1	1	1	0	0	1	1	1	0	32.49	6.4	6.3	6.5	6.9	6.6	97.6667	173	673	31	44	98.4362	26	0	1	1	1	1	1	1	0	0	0						0	2	17.3	67.3	4.4	9.84362	2.6
769	0	46	1	2	1	0	0	2	1	0	1	0	24.95	6.5	6.1	6.4	6.4	6.5	100.667	211	75	52	144	97.5556	31	0	0	1	0	1	0	0	0	0	0						0	1	21.1	7.5	14.4	9.75556	3.1
770	0	43	1	2	1	1	0	1	1	1	1	0	31.76	7	6.4	6.9	6.3	6.6	84.3333	168	210	37	105	80.6227	102	0	1	1	0	3	1	0	0	0	0						0	2	16.8	21	10.5	8.06227	10.2
771	0	59	0	1	0	0	0	2	1	1	1	0	30.11	7.9	5.7	5.8	6.3	6.1	91.3333	193	151	66	93	132.375	28	0	1	0	0	4	0	0	0	0	0						0	2	19.3	15.1	9.3	13.2375	2.8
772	0	54	0	3	0	0	0	0	1	0	0	0	29.65	6.3	6.8	6.5	6.7	6.6	97.3333	184	225	64	91	74.4702	18	0	1	1	0	1	0	0	0	0	0						0	1	18.4	22.5	9.1	7.44702	1.8
773	1	45	1	2	1	0	0	1	1	#NULL!	#NULL!	0	32.56	6.4	6.3	6.8	8.7	9	111	179	140	46	108	71.6363	87	0	1	1	0	4	1	1	0	0	0						1	2	17.9	14	10.8	7.16363	8.7
774	0	53	1	1	0	0	0	0	1	1	1	1	24.07	7.3	7.4	7.2	7.7	6.6	108.667	230	280	43	136	128.999	37	0	0	0	1	1	0	0	0	0	0						0	2	23	28	13.6	12.8999	3.7
775	0	52	1	1	1	0	0	2	1	0	1	0	27.58	7.8	6.5	6.4	6	7	105	247	625	41	114	70.0234	33	0	1	1	1	1	0	0	0	0	0						0	1	24.7	62.5	11.4	7.00234	3.3
776	0	51	1	2	1	1	0	1	1	1	1	1	32.35	6.5	6.1	6.4	6.5	6.3	86.3333	160	140	45	87	73.65	81	0	1	1	0	2	0	1	0	0	0						0	2	16	14	8.7	7.365	8.1
777	0	48	1	2	1	0	1	0	0	1	1	1	27.45	7.8	5.9	5.5	5.8	6.4	109.333	187	228	29	118	91.23	73	0	0	0	1	1	0	0	0	0	0						0	2	18.7	22.8	11.8	9.123	7.3
778	0	64	0	0	0	0	0	0	1	0	1	0	21.9	7.2	6.2	6.2	6.4	6	86	189	126	39	122	45.0864	19	1	1	0	0	2	0	0	0	1	0						0	1	18.9	12.6	12.2	4.50864	1.9
779	0	45	0	1	1	0	0	0	1	0	1	1	31.85	5.7	5.8	5.8	6.2	5.9	103	173	127	55	108	110.224	7	0	1	0	0	1	0	0	0	0	0						0	1	17.3	12.7	10.8	11.0224	0.7
780	0	49	1	2	1	0	0	0	1	1	1	1	22.72	5.9	6.1	6.4	6.4	6	99.3333	144	196	34	86	70.8565	33	0	1	0	0	1	0	0	0	0	0						0	1	14.4	19.6	8.6	7.08565	3.3
781	0	45	0	2	1	0	0	0	1	0	1	0	28.86	7.3	7.1	6.1	6.1	6.8	86	199	121	52	123	111.85	17	0	0	1	0	1	0	0	0	0	0						0	1	19.9	12.1	12.3	11.185	1.7
782	0	56	1	0	0	1	1	0	1	0	1	0	23.41	6.5	6.5	7	6.2	6.4	114.333	177	378	43	82	99.9977	46	0	1	0	0	2	0	0	0	0	0						0	1	17.7	37.8	8.2	9.99977	4.6
783	1	46	0	1	0	0	0	2	1	0	1	0	28.35	7.3	7.7	8	7.1	7.5	96.3333	198	139	61	119	107.626	25	0	0	0	0	1	0	0	0	0	0						1	1	19.8	13.9	11.9	10.7626	2.5
784	0	51	1	2	0	0	1	0	1	1	1	0	39.76	6	5.9	5.9	6.2	6.2	103.333	177	199	42	105	63.8302	49	0	1	0	1	2	0	0	0	0	0						0	1	17.7	19.9	10.5	6.38302	4.9
785	0	53	0	2	1	0	0	2	1	1	1	0	25.44	6.2	6.8	6.8	6.5	6.2	91.3333	178	209	44	116	120.21	39	0	1	0	0	2	0	0	0	0	0						0	1	17.8	20.9	11.6	12.021	3.9
786	0	56	0	1	0	0	1	1	1	#NULL!	#NULL!	0	29.91	6.8	6.5	6.5	6.2	6.2	97.6667	134	281	30	50	114.336	16	0	1	0	0	4	1	0	0	0	0						0	2	13.4	28.1	5	11.4336	1.6
787	0	57	1	1	0	0	0	0	1	0	1	0	24.34	7	7.3	6.9	7	6.8	91.6667	179	64	65	108	77.0186	26	0	0	1	0	1	0	0	0	0	0						0	1	17.9	6.4	10.8	7.70186	2.6
788	1	39	1	2	1	1	0	0	1	1	1	1	21.89	7.5	7.9	6.4	6.4	7.1	90.3333	171	220	34	92	101.726	23	0	0	0	0	1	0	0	0	0	0						1	2	17.1	22	9.2	10.1726	2.3
789	1	52	0	0	0	0	0	0	1	0	1	0	36.91	6.2	6.4	6.8	6.8	7.2	100	189	169	42	115	39.4877	21	0	1	1	0	2	1	0	1	0	0						1	1	18.9	16.9	11.5	3.94877	2.1
790	0	34	1	2	0	0	0	0	1	0	1	0	26.2	6.3	6.5	6.4	6.4	6.4	103	207	543	58	70	49.7271	13	0	0	0	1	3	0	0	0	0	0						0	1	20.7	54.3	7	4.97271	1.3
791	0	57	1	2	0	0	0	2	1	1	1	0	32.14	5.9	5.4	5.5	5.6	5.6	109	170	128	32	98	54.01	31	0	1	1	0	2	0	0	0	0	0						0	2	17	12.8	9.8	5.401	3.1
792	1	54	1	2	1	0	0	0	1	1	0	0	26.33	7.1	6.6	7.5	6.7	7.4	93.3333	212	344	39	106	97.9086	43	0	1	1	1	3	0	0	0	0	0						1	2	21.2	34.4	10.6	9.79086	4.3
793	1	57	0	1	0	0	0	0	1	1	1	0	27.05	7.8	7.8	6.2	6.7	7.3	103.667	170	71	49	111	124.288	24	0	0	0	0	1	0	0	0	0	0						1	1	17	7.1	11.1	12.4288	2.4
794	0	52	0	2	1	0	0	0	1	1	1	0	20.26	6.6	6.4	6.3	6.5	6.6	92.6667	156	90	41	104	75.0323	16	0	0	0	0	2	0	0	0	0	0						0	1	15.6	9	10.4	7.50323	1.6
795	0	63	0	1	1	0	0	2	1	1	1	0	27.73	6.6	6.7	6.3	6.1	6.7	90	186	306	57	89	121.803	21	0	0	1	0	1	0	0	0	0	0						0	2	18.6	30.6	8.9	12.1803	2.1
796	0	46	1	2	0	1	1	0	1	0	1	0	22.62	7.9	6.2	5.9	6	6.3	69.3333	233	292	45	144	86.5014	17	0	0	1	1	2	0	0	0	0	0						0	1	23.3	29.2	14.4	8.65014	1.7
797	0	36	1	3	1	0	0	2	1	#NULL!	#NULL!	1	39.71	7.5	5.2	5.1	5	5.1	88	114	139	31	66	114.314	31	0	1	1	0	4	1	1	0	0	0						0	2	11.4	13.9	6.6	11.4314	3.1
798	0	44	1	2	0	0	0	0	1	0	1	0	31.46	7.8	6.7	6.6	6.6	6.4	115	208	101	51	135	59.5141	35	0	0	0	0	1	0	0	0	0	0						0	1	20.8	10.1	13.5	5.95141	3.5
799	1	37	1	3	0	0	0	1	1	#NULL!	#NULL!	1	41.9	7.5	7.1	8.1	7.1	7.4	120.667	130	90	47	69	84.0801	29	2	0	1	0	1	0	0	0	0	0						1	2	13	9	6.9	8.40801	2.9
800	0	50	0	1	0	0	0	0	1	#NULL!	#NULL!	0	25.84	6.6	6.2	6.4	6.4	6.3	93.3333	167	134	31	107	88.219	23	0	0	0	0	1	0	0	0	0	0						0	1	16.7	13.4	10.7	8.8219	2.3
801	0	62	0	0	0	0	0	0	1	0	0	0	28.07	7.4	7	7.5	6.6	6.6	94.6667	189	158	55	106	72.681	127	0	1	0	0	1	0	1	0	0	0						0	1	18.9	15.8	10.6	7.2681	12.7
802	1	52	0	1	1	1	0	0	1	0	1	0	28.44	6.1	6.4	7.5	8.2	7.5	103	218	241	34	132	65.4965	17	0	1	1	1	3	0	0	1	1	0						1	1	21.8	24.1	13.2	6.54965	1.7
803	0	55	1	1	0	0	0	0	1	0	1	0	24.18	7.7	6.3	7.3	7.3	6.5	112	186	156	42	113	83.4554	79	0	0	0	0	1	0	0	0	0	0						0	1	18.6	15.6	11.3	8.34554	7.9
804	0	45	0	2	1	0	0	0	1	1	1	0	28.63	6.3	6.5	6.3	6.1	6	94.3333	154	104	37	97	94.7571	47	0	1	1	0	3	1	0	0	0	0						0	2	15.4	10.4	9.7	9.47571	4.7
805	0	57	1	2	0	1	0	0	1	0	1	0	22.68	7	7	7	6.1	6.5	116.667	201	147	50	132	86.976	35	0	1	1	0	1	0	0	0	0	0						0	1	20.1	14.7	13.2	8.6976	3.5
806	0	48	0	1	0	0	0	1	1	1	1	0	33.65	6.5	6.8	6.8	7	6.5	113	181	258	45	97	88.9383	26	0	0	1	1	2	0	0	0	0	0						0	1	18.1	25.8	9.7	8.89383	2.6
807	0	45	1	2	1	0	0	0	1	1	1	0	46.48	5.5	5.5	5.9	6.3	6.1	108.667	191	75	54	126	112.108	48	0	1	1	0	4	0	1	0	0	0						0	1	19.1	7.5	12.6	11.2108	4.8
808	1	52	0	1	0	0	0	2	1	1	1	0	41.52	7.3	6.9	6.8	7.3	7.3	127.667	215	164	58	138	75.6205	30	0	1	1	0	1	0	0	0	0	0						1	1	21.5	16.4	13.8	7.56205	3
809	0	49	0	2	1	0	0	0	1	1	1	0	24.06	7.1	6.5	6.5	6.4	6.5	88	129	100	41	70	110.49	51	0	0	1	0	2	0	0	0	0	0						0	2	12.9	10	7	11.049	5.1
810	1	59	1	1	1	0	0	0	1	1	1	0	28.76	7.3	7.1	7.7	7.7	8.5	113.333	132	176	44	72	68.282	29	0	1	1	0	1	0	0	0	0	0						1	1	13.2	17.6	7.2	6.8282	2.9
811	0	61	1	1	1	0	0	0	1	1	1	0	20.96	7.1	7.2	6.5	6.1	6	95	182	98	47	109	85.7868	22	2	1	0	0	3	0	0	0	0	0						0	1	18.2	9.8	10.9	8.57868	2.2
812	0	38	1	2	1	0	0	0	1	1	1	0	34.32	7.4	7.3	8.7	8.7	6.9	85	166	212	36	98	147.157	46	0	1	1	0	3	0	0	0	0	0						0	2	16.6	21.2	9.8	14.7157	4.6
813	1	39	1	3	1	0	0	2	1	0	0	0	30.93	7.5	8.6	9.5	9.5	9.5	103.333	165	594	39	81	124.904	62	0	1	0	1	1	0	0	0	0	0						1	1	16.5	59.4	8.1	12.4904	6.2
814	0	55	1	1	1	0	0	0	1	1	1	0	31.03	6.2	6.4	5.8	5.8	6	106.333	136	75	42	74	66.94	29	0	1	0	0	2	0	0	0	0	0						0	2	13.6	7.5	7.4	6.694	2.9
815	0	57	0	2	0	0	0	0	1	0	1	0	22.43	5.5	5.5	6	5.8	5.1	107	167	59	51	86	64.5362	29	0	1	0	0	1	0	0	0	0	0						0	1	16.7	5.9	8.6	6.45362	2.9
816	0	64	1	1	0	0	0	2	1	1	1	0	29.1	6.5	5.9	5.9	5.9	6.2	104.333	144	199	34	84	83.8178	37	0	1	1	0	4	0	1	0	0	0						0	2	14.4	19.9	8.4	8.38178	3.7
817	1	64	0	0	0	0	0	0	1	0	1	0	27.31	6.7	6.5	6.5	7.8	7.8	123	164	146	40	95	63.0364	38	0	1	0	0	2	0	0	0	0	0						1	1	16.4	14.6	9.5	6.30364	3.8
818	0	61	1	2	0	0	1	2	1	1	1	1	25.1	6	5.9	6.2	6.4	6.4	104.667	125	55	53	63	73.3309	15	0	1	1	0	1	1	1	0	0	0						0	1	12.5	5.5	6.3	7.33309	1.5
819	0	57	1	1	1	0	0	0	1	#NULL!	#NULL!	0	25.83	7.1	6.6	6.9	7	6.9	92.6667	202	100	40	147	74.3336	52	0	0	0	0	2	0	0	0	0	0						0	1	20.2	10	14.7	7.43336	5.2
820	1	37	1	2	0	0	0	0	1	0	1	0	28.73	7.7	9.3	9.3	6.4	7.4	105.667	189	329	34	106	61.6089	30	0	1	0	1	1	0	0	0	0	0						1	1	18.9	32.9	10.6	6.16089	3
821	0	63	0	1	1	0	0	2	1	1	1	1	30.36	6.1	5.7	5.7	5.8	5.7	85.3333	162	89	52	95	111.63	26	0	0	1	0	1	0	0	0	0	0						0	2	16.2	8.9	9.5	11.163	2.6
822	0	63	1	1	1	0	0	0	1	0	1	0	26.82	5.7	6	6.1	6.1	6	111.667	217	317	41	119	85.2268	28	0	1	1	1	2	0	0	0	0	0						0	1	21.7	31.7	11.9	8.52268	2.8
823	1	57	1	3	0	1	1	2	1	0	1	1	30.25	7.3	7.3	8.6	10.6	11	96	179	149	44	119	39.2258	36	0	1	1	1	1	1	0	0	0	0						1	1	17.9	14.9	11.9	3.92258	3.6
824	0	58	1	2	0	0	0	0	1	1	1	0	32.33	6.7	6.4	6.3	6.7	7	127	157	92	48	90	78.5574	33	0	1	1	0	2	1	0	0	0	0						0	2	15.7	9.2	9	7.85574	3.3
825	0	58	0	1	0	0	0	2	1	1	1	1	30.15	6.4	5.4	5.2	5.1	5	104.333	166	63	38	107	150.81	17	0	1	1	0	1	0	1	0	0	0						0	2	16.6	6.3	10.7	15.081	1.7
826	0	62	1	2	0	0	0	2	1	1	1	0	27.09	6.5	5.7	5.7	5.7	5.9	112	232	83	56	148	75.7151	29	0	1	1	0	2	1	0	0	0	0						0	2	23.2	8.3	14.8	7.57151	2.9
827	0	38	0	3	1	1	0	0	1	1	1	1	28.36	6.5	6	6.3	6.5	6.5	123.667	146	99	46	84	131.971	16	2	1	1	0	1	0	0	0	0	0						0	2	14.6	9.9	8.4	13.1971	1.6
828	0	52	0	0	0	0	0	1	1	1	0	1	34.94	6.2	6	5.8	6.1	6	130	157	102	60	91	51.9573	21	0	1	0	0	2	0	0	0	0	0						0	1	15.7	10.2	9.1	5.19573	2.1
829	0	60	1	2	1	1	1	1	1	1	1	1	26.05	6.9	6.5	6.8	6.6	6.3	97.3333	162	47	45	95	109.597	28	0	0	0	0	1	0	0	0	0	0						0	2	16.2	4.7	9.5	10.9597	2.8
830	1	60	1	0	1	0	0	0	1	1	1	0	29.17	6.3	5.4	5.5	5.5	9.8	84.6667	248	91	83	155	101.53	154	0	0	1	0	2	0	0	0	0	0						1	1	24.8	9.1	15.5	10.153	15.4
831	1	50	0	1	1	0	0	0	1	0	1	0	25.56	7.1	8.5	7.5	7.5	7.1	99.6667	256	119	50	179	84.8083	24	0	1	1	0	1	1	1	0	0	0						1	1	25.6	11.9	17.9	8.48083	2.4
832	0	46	0	1	1	0	1	2	1	1	1	0	21.28	7.3	6.3	6.3	6.8	7	82	158	79	54	97	83.192	11	0	0	0	1	1	0	0	0	0	0						0	1	15.8	7.9	9.7	8.3192	1.1
833	1	58	1	2	0	0	0	2	1	1	0	0	28.02	7.6	6.3	6.2	7.8	7.8	99.6667	136	153	29	76	68.75	23	0	1	0	1	2	0	0	0	0	0						1	2	13.6	15.3	7.6	6.875	2.3
834	0	46	0	1	1	0	0	2	1	1	0	0	25.28	7	7.4	7.8	6.7	7	103	156	130	45	91	143.843	39	0	0	1	0	3	0	0	0	0	0						0	1	15.6	13	9.1	14.3843	3.9
835	1	46	0	3	1	0	0	0	1	1	1	0	27.16	6.5	7	7.1	7.7	7.7	91.6667	162	211	28	108	129.26	52	0	1	1	1	1	0	0	0	0	0						1	2	16.2	21.1	10.8	12.926	5.2
836	0	56	0	0	1	0	0	1	1	1	0	0	28.6	6.3	6.9	7.4	7	6.8	98.6667	181	60	66	92	74.1983	43	0	1	1	0	2	0	0	0	0	0						0	1	18.1	6	9.2	7.41983	4.3
837	1	40	0	1	1	0	0	0	1	1	1	0	27.85	7.2	7.5	7.1	7.7	7.6	86.3333	188	95	57	110	92.2155	24	0	0	0	0	1	0	0	0	0	0						1	1	18.8	9.5	11	9.22155	2.4
838	1	55	1	2	0	0	0	0	1	0	1	0	25.16	7.7	7.3	7.3	7.3	7.4	89	174	61	45	117	87.2891	24	0	0	0	0	1	0	0	0	0	0						1	1	17.4	6.1	11.7	8.72891	2.4
839	0	45	0	2	1	0	0	1	0	1	1	0	32.95	5	5.6	5.6	6.1	5.9	80.6667	172	68	45	100	90.0863	26	0	0	0	0	1	0	0	0	0	0						0	1	17.2	6.8	10	9.00863	2.6
840	0	59	1	1	0	0	0	0	1	1	1	0	28.64	6.6	5.9	5.9	6.5	6.2	99.6667	241	164	67	145	61.9698	28	0	1	1	0	2	0	0	0	0	0						0	1	24.1	16.4	14.5	6.19698	2.8
841	0	53	1	2	0	0	0	0	1	0	0	0	30.34	7	6.8	6.9	6.6	7	88.6667	216	258	41	139	84.0778	32	0	0	1	0	2	1	0	0	0	0						0	1	21.6	25.8	13.9	8.40778	3.2
842	0	37	0	3	1	0	0	2	1	1	0	0	24.22	7.8	6.7	5.6	5.6	5.6	81.6667	148	345	34	72	138.081	47	0	1	0	1	1	0	0	0	0	0						0	2	14.8	34.5	7.2	13.8081	4.7
843	0	56	0	2	1	0	0	2	1	1	1	0	26.79	6.9	6.7	6.6	6.6	6.7	85.3333	147	108	53	68	67.3526	87	0	1	1	0	1	0	0	0	0	0						0	2	14.7	10.8	6.8	6.73526	8.7
844	0	32	0	3	1	0	0	1	1	1	1	0	30.98	6.7	5.9	5.8	5.9	5.8	86.6667	157	91	52	87	95.3991	14	0	0	1	0	1	0	0	0	0	0						0	2	15.7	9.1	8.7	9.53991	1.4
845	0	61	0	1	0	0	0	2	1	1	1	0	26.76	6.4	6.8	6.5	6.3	6.4	129.667	162	120	55	87	75.9585	32	0	1	0	0	1	0	0	0	0	0						0	2	16.2	12	8.7	7.59585	3.2
846	1	59	0	2	0	0	0	2	1	1	1	0	24.9	7.2	7.6	7.4	7.4	7.4	95.6667	139	265	48	59	38.622	36	0	1	1	0	4	0	0	0	0	0						1	1	13.9	26.5	5.9	3.8622	3.6
847	0	47	1	3	1	1	0	2	1	1	1	0	25.12	7.6	6	6.1	5.7	5.9	98	125	144	28	82	81.0288	47	0	1	1	0	2	1	0	0	0	0						0	2	12.5	14.4	8.2	8.10288	4.7
848	0	64	0	2	0	0	0	0	1	1	1	0	23.37	6.2	5.9	5.9	5.7	6	94.6667	174	159	48	106	63.0364	29	0	1	0	0	1	0	1	0	0	0						0	1	17.4	15.9	10.6	6.30364	2.9
849	1	58	0	0	0	0	0	0	1	#NULL!	#NULL!	0	30.22	7.9	7.9	7.9	7.5	8.3	102.667	247	231	64	126	73.6716	66	0	0	1	0	1	0	0	0	0	0						1	1	24.7	23.1	12.6	7.36716	6.6
850	1	48	1	1	1	1	1	#NULL!	0	#NULL!	#NULL!	0	22.91	6.2	6.4	9.4	8.1	7.1	107.333	207	128	77	93	96.7249	47	0	1	0	0	1	0	0	0	0	0						1	1	20.7	12.8	9.3	9.67249	4.7
851	0	64	0	1	0	0	0	1	1	1	1	1	23.61	7	6.6	6.7	6.4	6.8	96.3333	203	68	64	115	85.3864	14	0	0	1	0	2	1	0	0	0	0						0	2	20.3	6.8	11.5	8.53864	1.4
852	1	37	1	2	1	0	0	1	1	1	1	1	28.51	7.3	6.2	6.7	6.7	7.9	104	158	94	61	75	82.6714	51	0	0	1	0	1	0	0	0	0	0						1	2	15.8	9.4	7.5	8.26714	5.1
853	0	41	1	2	1	1	0	0	1	1	1	0	28.06	6.4	6.1	5.9	6	6.1	88.3333	149	198	41	80	99.8375	29	0	1	1	1	2	0	0	0	0	0						0	1	14.9	19.8	8	9.98375	2.9
854	1	48	1	2	0	1	1	0	1	#NULL!	#NULL!	0	33.82	7.9	6.7	7.3	7.3	7.3	108.333	157	176	33	101	71.4462	13	0	1	0	1	2	0	0	0	0	0						1	1	15.7	17.6	10.1	7.14462	1.3
855	1	60	1	2	1	1	0	0	1	0	1	0	27.01	7.2	7.9	10.1	7.5	7.2	120.333	187	215	39	109	68.0533	38	0	1	0	0	3	0	0	1	0	0						1	1	18.7	21.5	10.9	6.80533	3.8
856	1	43	1	2	0	0	0	0	1	#NULL!	#NULL!	0	28.76	7.3	6.6	7	7	9.2	104.667	142	158	29	89	73.0595	34	0	1	0	0	1	0	0	0	0	0						1	1	14.2	15.8	8.9	7.30595	3.4
857	1	46	0	2	1	0	0	0	1	1	1	0	20.74	7.5	7.5	6.6	7.9	7.3	74.6667	132	175	43	61	150	11	0	0	0	0	3	0	0	0	0	0						1	2	13.2	17.5	6.1	15	1.1
858	0	36	0	2	1	0	0	0	1	0	1	0	26.71	7.3	6.3	6.5	6.5	6.7	99	206	244	43	118	205.432	25	0	0	0	0	1	0	0	0	0	0						0	1	20.6	24.4	11.8	20.5432	2.5
859	0	43	0	2	1	0	0	0	1	1	1	0	24.05	6.8	6.8	5.4	5.1	5.1	80	157	81	63	77	131.562	14	0	0	0	0	1	0	0	0	0	0						0	1	15.7	8.1	7.7	13.1562	1.4
860	0	62	1	2	1	0	0	0	1	1	1	0	26.77	6.3	6.7	6.7	7.3	5.7	77	204	145	64	86	66.9066	38	0	1	0	0	2	0	0	0	0	0						0	2	20.4	14.5	8.6	6.69066	3.8
861	0	59	1	1	0	1	1	0	1	1	1	0	21.32	6.6	6	6	5.5	5.5	100.333	145	219	47	66	98.94	16	0	0	0	1	1	0	0	0	0	0						0	2	14.5	21.9	6.6	9.894	1.6
862	1	62	1	2	0	1	0	0	1	1	1	0	24.38	6.6	10.6	9.5	8.4	8.3	88.6667	171	239	42	93	97.6351	24	0	1	1	1	1	0	1	0	0	0						1	1	17.1	23.9	9.3	9.76351	2.4
863	1	49	0	2	0	0	0	0	1	1	1	0	29.48	7.7	6.8	7.5	7.4	8.7	97	238	81	43	171	72.06	28	0	0	1	0	3	0	0	0	0	0						1	2	23.8	8.1	17.1	7.206	2.8
864	0	60	1	0	1	1	0	0	1	0	1	0	32.51	7.1	6.6	6.2	6.4	6.2	93.6667	223	223	38	126	98.6069	28	0	0	0	1	3	0	0	0	0	0						0	1	22.3	22.3	12.6	9.86069	2.8
865	0	45	1	2	0	0	0	2	1	1	1	0	20.38	6.1	6.5	6.3	6.1	6	81	153	32	35	104	107.636	36	0	0	0	0	1	0	0	0	0	0						0	2	15.3	3.2	10.4	10.7636	3.6
866	0	61	1	2	1	1	1	0	1	0	1	0	25.1	6.6	5.7	5.6	5.7	5.7	109	200	459	29	95	71.8065	25	0	1	0	1	1	0	0	0	0	0						0	2	20	45.9	9.5	7.18065	2.5
867	0	57	1	3	1	0	1	2	1	1	1	0	20.87	7.4	6.6	6.2	6.6	6.7	73	140	88	38	86	110.74	29	0	0	1	0	2	0	0	0	0	0						0	2	14	8.8	8.6	11.074	2.9
868	0	60	0	0	0	0	0	0	1	0	0	0	24.92	6.4	6	5.9	5.8	5.8	94.6667	212	108	48	141	123.008	26	0	0	1	1	1	0	0	0	0	0						0	1	21.2	10.8	14.1	12.3008	2.6
869	0	64	1	1	0	0	0	2	1	0	0	0	24.7	6.9	6.9	6.8	7	6.7	98	170	162	55	95	60.9549	84	0	1	1	0	2	0	1	0	0	0						0	1	17	16.2	9.5	6.09549	8.4
870	1	40	1	2	1	1	0	2	1	1	0	0	24.52	7.5	7.5	7.5	7.5	7.5	104.667	172	156	36	110	72.2721	39	0	0	0	0	1	0	0	0	0	0						1	1	17.2	15.6	11	7.22721	3.9
871	0	53	1	1	0	1	0	0	0	0	0	0	23.58	5.3	5.4	6	6	6.2	98.3333	171	184	36	97	70.0234	20	0	0	0	0	1	0	0	0	0	0						0	1	17.1	18.4	9.7	7.00234	2
872	0	40	1	2	1	1	0	0	1	0	1	0	28.39	5.9	6.7	6.4	6.7	6.5	95.6667	227	145	47	157	82.3461	19	0	1	1	0	3	1	1	0	1	0						0	1	22.7	14.5	15.7	8.23461	1.9
873	0	64	0	1	0	0	0	2	1	0	1	0	30.47	5.7	6	5.7	5.7	5.8	91	165	126	37	106	182.868	20	0	1	0	0	2	0	0	0	0	0						0	2	16.5	12.6	10.6	18.2868	2
874	1	50	1	3	1	1	0	0	1	0	1	0	30.79	6.7	7.6	7.6	7.6	7.6	100	213	136	38	149	58.4328	74	0	0	1	0	2	0	0	0	0	0						1	1	21.3	13.6	14.9	5.84328	7.4
875	1	56	1	2	1	0	0	2	1	0	1	1	27.82	7.7	7.6	7.1	7.1	7.5	97	163	384	30	74	83.1544	26	0	1	0	1	1	0	0	0	0	0						1	1	16.3	38.4	7.4	8.31544	2.6
876	0	46	1	3	0	1	0	1	1	1	1	0	27.67	6.1	5.9	6.1	6	6.1	98.6667	178	252	35	102	102.59	24	0	1	0	1	1	0	0	0	0	0						0	2	17.8	25.2	10.2	10.259	2.4
877	0	45	0	2	0	0	0	2	1	1	0	0	28.12	6.9	6.5	6.7	7	6.9	110	175	363	42	54	102.188	69	0	0	0	0	1	0	0	0	0	0						0	2	17.5	36.3	5.4	10.2188	6.9
878	0	59	0	1	0	0	0	0	1	1	1	0	22.72	7.2	5.6	5.8	5.6	5.8	87	165	332	41	73	56.7491	25	0	0	0	0	2	0	0	0	0	0						0	1	16.5	33.2	7.3	5.67491	2.5
879	0	53	0	2	0	0	0	0	1	1	1	0	33.01	6.6	5.9	5.9	6.7	6.6	101.667	90	457	24	19	89.9688	17	0	1	1	1	2	0	0	0	0	0						0	1	9	45.7	1.9	8.99688	1.7
880	0	50	0	1	1	0	0	0	1	0	1	0	39	6.1	6.3	6.7	6.5	6.5	120.333	199	209	41	117	75.6205	39	0	1	0	0	2	0	0	0	0	0						0	1	19.9	20.9	11.7	7.56205	3.9
881	1	50	0	1	1	0	0	0	1	0	1	0	27.16	7.6	7.2	7.2	7.8	7.8	89.3333	278	123	70	178	88.219	8	0	1	1	0	1	0	0	0	0	0						1	1	27.8	12.3	17.8	8.8219	0.8
882	1	35	1	2	0	0	0	1	1	0	1	0	33.06	6.4	6.4	8.1	8.1	7.5	114.667	249	275	47	157	91.3789	63	0	1	1	0	1	0	0	0	1	0						1	1	24.9	27.5	15.7	9.13789	6.3
883	0	46	1	2	1	0	0	2	1	1	1	0	35.21	7.5	6.2	5.7	5.7	6	127.333	152	112	40	95	68.46	22	0	1	0	0	1	0	0	0	0	0						0	2	15.2	11.2	9.5	6.846	2.2
884	0	40	1	2	0	1	1	0	1	0	0	0	25.65	5.6	5.7	5.9	6.3	5.9	99.6667	138	188	47	63	100.334	23	0	1	0	0	1	0	0	0	0	0						0	1	13.8	18.8	6.3	10.0334	2.3
885	0	36	0	2	0	0	0	0	1	1	0	0	31.68	5.7	5.3	5.7	5.5	5.9	86.6667	167	109	50	99	169.77	12	1	0	0	0	1	0	0	0	0	0						0	2	16.7	10.9	9.9	16.977	1.2
886	1	53	0	2	1	0	0	0	0	0	1	0	25.71	7.7	8.8	8.2	7.3	7.5	103	165	125	39	109	104.179	46	0	0	1	0	2	0	0	0	0	0						1	2	16.5	12.5	10.9	10.4179	4.6
887	0	37	1	3	0	1	0	0	1	1	1	0	29.94	5.7	5.8	5.7	5.8	6.1	96	177	63	44	123	86.06	35	0	1	1	1	2	0	0	0	0	0						0	2	17.7	6.3	12.3	8.606	3.5
888	0	57	1	2	1	0	0	2	1	1	1	0	27.11	6	5.8	5.7	5.6	5.8	130	171	44	59	99	112.12	27	0	1	0	0	1	0	0	0	0	0						0	2	17.1	4.4	9.9	11.212	2.7
889	1	46	0	2	1	0	0	1	1	0	1	0	32.5	6.7	6.2	7.1	8.2	8.1	92	161	197	31	103	121.54	27	0	1	0	0	2	0	0	0	0	0						1	2	16.1	19.7	10.3	12.154	2.7
890	1	63	0	1	0	0	0	1	1	0	1	0	36.65	7.5	7.5	7	9.2	10.9	108	195	127	35	143	121.803	39	0	1	1	0	1	0	0	0	0	0						1	1	19.5	12.7	14.3	12.1803	3.9
891	0	53	0	2	1	0	0	2	1	1	1	1	25.98	6.4	6.3	6.2	6.1	6.5	72.3333	215	146	48	138	110.53	21	0	0	1	0	1	0	0	0	0	0						0	2	21.5	14.6	13.8	11.053	2.1
892	1	51	0	2	0	0	0	0	1	1	1	0	27.35	6.9	6.7	7	6.7	7.1	110.333	176	83	45	113	138.391	18	0	1	0	0	1	0	0	0	0	0						1	2	17.6	8.3	11.3	13.8391	1.8
893	0	58	1	2	1	0	0	2	1	0	1	0	23.19	7.8	5.9	5.9	6.3	6.6	96.3333	130	66	53	63	68.5154	38	0	1	1	0	2	1	1	1	0	0						0	1	13	6.6	6.3	6.85154	3.8
894	1	52	0	2	1	0	0	2	1	1	1	0	25.99	6.9	8	8	7.8	7.3	113.333	296	528	55	177	70.9244	36	0	1	1	0	1	0	0	0	0	0						1	1	29.6	52.8	17.7	7.09244	3.6
895	0	44	0	2	1	0	0	0	1	1	1	1	23.58	5.9	5.5	5.6	5.7	5.6	107.333	198	399	51	84	100.807	30	0	0	0	0	1	0	0	0	0	0						0	2	19.8	39.9	8.4	10.0807	3
896	0	35	0	3	1	0	0	0	1	1	1	0	26.49	7	7	6.3	7.3	6.5	92	194	95	41	137	206.606	24	0	0	1	0	1	0	0	0	0	0						0	2	19.4	9.5	13.7	20.6606	2.4
897	1	51	0	2	1	0	0	0	0	1	1	0	22.14	7.7	9.1	7.9	7.6	7.6	80.6667	202	133	61	108	87.8719	25	0	0	1	0	1	0	0	0	0	0						1	1	20.2	13.3	10.8	8.78719	2.5
898	0	47	0	2	1	1	1	0	1	#NULL!	#NULL!	1	30.7	6.2	6.2	6	6	6.6	99	173	303	22	102	187.198	34	2	0	0	1	2	0	0	0	0	0						0	2	17.3	30.3	10.2	18.7198	3.4
899	0	55	0	1	0	0	0	0	1	#NULL!	#NULL!	0	28.35	3.7	4.2	4.9	4.9	4.9	102.333	147	106	47	78	93.8578	17	0	0	0	0	1	0	0	0	0	0						0	1	14.7	10.6	7.8	9.38578	1.7
900	0	39	0	2	0	0	0	0	1	#NULL!	#NULL!	0	23.94	5.7	7.1	6.4	6.4	6.6	88.6667	178	333	36	78	69.7044	47	0	0	0	1	2	0	0	0	0	0						0	1	17.8	33.3	7.8	6.97044	4.7
901	1	37	1	2	1	1	0	0	1	0	0	0	23.15	7.7	7.5	8	8	7.9	97	279	861	48	125	83.6261	31	0	0	1	1	1	0	0	0	0	0						1	1	27.9	86.1	12.5	8.36261	3.1
902	1	37	0	2	1	0	0	0	1	1	1	0	42.32	7.7	7.6	7.6	8.3	8.3	77.6667	176	199	35	103	93.6489	49	0	1	0	1	3	0	0	0	0	0						1	1	17.6	19.9	10.3	9.36489	4.9
903	0	57	0	1	0	0	0	0	1	0	0	0	22.81	6.8	6.2	6.2	6.5	6.6	93.6667	201	59	95	89	93.1851	35	0	1	1	0	1	0	0	0	0	0						0	1	20.1	5.9	8.9	9.31851	3.5
904	0	50	1	1	1	0	0	0	1	#NULL!	#NULL!	0	25.47	7.1	6.7	6.9	7.2	6.1	115	156	56	56	81	88.9622	25	0	1	0	0	2	0	0	0	0	0						0	1	15.6	5.6	8.1	8.89622	2.5
905	0	64	1	3	0	0	0	2	1	1	1	1	24.48	5.2	4.9	5.5	5.3	5.2	94.3333	128	92	31	77	98.7465	32	0	0	0	0	1	0	0	0	0	0						0	2	12.8	9.2	7.7	9.87465	3.2
906	1	64	0	1	0	0	0	0	1	0	1	1	19.15	5.5	6	10.3	9.8	9.8	93.3333	156	123	51	84	55.8197	19	2	1	1	0	3	0	0	0	0	0						1	1	15.6	12.3	8.4	5.58197	1.9
907	1	64	1	1	0	1	0	1	1	1	1	0	23.94	7.2	8.1	8.1	8.1	10.9	112.667	207	963	33	66	60.9549	21	2	0	0	1	3	0	0	0	0	0						1	1	20.7	96.3	6.6	6.09549	2.1
908	0	57	0	1	1	0	0	0	1	1	1	0	41.03	6.2	6.6	6.4	6.5	6.2	89.6667	145	45	56	72	115.95	16	0	1	1	0	1	0	0	0	0	0						0	1	14.5	4.5	7.2	11.595	1.6
909	0	36	0	2	1	0	0	1	1	1	1	1	43.11	5.4	5.9	5.8	5.9	6.3	128.333	156	61	76	71	80.7107	91	0	1	0	0	4	0	1	0	0	0						0	1	15.6	6.1	7.1	8.07107	9.1
910	0	47	0	2	1	0	0	2	1	1	1	0	23.45	5.8	5.9	6	6.3	6.2	98	230	81	57	161	135.883	11	0	0	1	0	1	0	0	0	0	0						0	1	23	8.1	16.1	13.5883	1.1
911	0	50	0	3	0	0	0	2	1	1	1	1	26.33	6.4	6.5	6.7	7	6.5	84	199	74	49	135	92.79	41	0	1	1	0	3	0	0	0	0	0						0	2	19.9	7.4	13.5	9.279	4.1
912	0	60	1	2	0	0	0	0	1	1	1	0	18.61	6.4	8.3	8.4	8.4	6.3	76.6667	113	107	33	61	34.1372	38	1	1	0	0	3	1	1	0	0	0						0	1	11.3	10.7	6.1	3.41372	3.8
913	0	60	1	1	0	0	0	0	1	0	1	0	29.69	6.2	5.8	5.9	6.2	6.1	105.667	203	106	59	126	56.121	44	0	1	0	0	2	0	0	0	0	0						0	1	20.3	10.6	12.6	5.6121	4.4
914	0	59	1	3	1	0	0	1	1	1	0	1	23.94	6.6	6.1	5.9	6.1	6.2	97	163	160	55	79	66.865	26	0	0	0	0	1	0	0	0	0	0						0	1	16.3	16	7.9	6.6865	2.6
915	1	54	0	0	0	0	0	0	1	0	1	0	29.07	6.3	7.8	7.8	7.5	7.1	100	199	177	43	124	107.813	18	0	1	0	0	1	0	0	0	0	0						1	1	19.9	17.7	12.4	10.7813	1.8
916	0	62	0	1	0	0	0	0	1	1	1	0	25.36	6.1	6	5.8	5.6	5.8	128	117	187	36	48	102.947	35	0	1	1	0	2	0	0	0	0	0						0	2	11.7	18.7	4.8	10.2947	3.5
917	0	40	0	2	1	0	0	1	1	0	1	1	22.76	7	6.1	6.6	6	6.3	107.333	205	128	51	138	147.961	11	1	0	0	0	1	0	0	0	0	0						0	1	20.5	12.8	13.8	14.7961	1.1
918	1	56	0	1	1	0	0	2	1	0	1	0	32.48	6.9	6.7	6.9	7	7.2	84	156	152	56	73	73.9322	34	0	1	0	0	2	0	0	0	0	0						1	1	15.6	15.2	7.3	7.39322	3.4
919	0	49	0	1	1	0	0	0	1	0	1	0	34.99	7.3	7.9	7.1	7	6.9	113.667	233	135	59	#NULL!	76.2371	62	0	1	1	0	2	0	0	0	1	0						0	1	23.3	13.5	#NULL!	7.62371	6.2
920	0	50	1	2	0	0	0	1	1	1	1	1	38.4	6.4	6.6	6.9	6.9	6.8	96.3333	193	115	52	120	80.6355	71	0	1	1	0	1	0	0	0	0	0						0	2	19.3	11.5	12	8.06355	7.1
921	0	42	0	2	1	0	0	1	1	1	1	0	25.95	7.8	6.7	6.9	6.5	6.1	74	161	156	33	94	101.76	34	0	0	0	0	3	0	0	1	0	0						0	2	16.1	15.6	9.4	10.176	3.4
922	1	46	0	1	0	1	0	2	1	0	1	0	36.85	6.2	6.2	6.7	6.8	7.3	99	190	163	55	106	111.355	54	0	0	1	0	2	0	0	0	0	0						1	1	19	16.3	10.6	11.1355	5.4
923	0	43	0	3	0	0	0	1	1	0	1	1	26.98	7.3	6.9	6.5	6.6	6.5	94.6667	139	76	34	89	141.15	22	0	0	1	0	3	0	0	0	0	0						0	2	13.9	7.6	8.9	14.115	2.2
924	0	53	1	2	1	0	1	1	1	1	1	0	26.55	6.7	6.5	6.8	6.6	6.6	99.3333	190	154	33	124	86.0595	73	0	0	1	0	1	1	1	0	0	0						0	2	19	15.4	12.4	8.60595	7.3
925	0	55	1	1	0	1	0	1	1	1	1	0	23.04	6.2	5.5	5.7	5.7	5.9	101.667	149	101	53	84	52.6154	12	0	1	1	0	1	0	1	0	0	0						0	1	14.9	10.1	8.4	5.26154	1.2
926	1	40	1	2	0	0	0	0	1	1	1	0	32.17	5.8	5.9	7.7	12.3	12.3	97.3333	140	447	52	27	184.166	62	2	0	1	1	1	0	0	0	0	0						1	1	14	44.7	2.7	18.4166	6.2
927	0	46	1	2	1	1	0	2	1	1	1	1	28.89	7.3	5.5	5.5	5.5	5.5	89.3333	184	94	48	114	90.6256	22	0	0	0	0	1	0	0	0	0	0						0	2	18.4	9.4	11.4	9.06256	2.2
928	0	44	0	3	0	0	0	1	1	1	1	1	19.83	7.8	7.4	7.1	7	7	88	134	110	35	83	375.604	20	0	0	0	0	4	0	0	0	0	0						0	2	13.4	11	8.3	37.5604	2
929	1	48	1	3	1	0	0	1	1	1	1	1	28.93	7.6	7.8	8.3	8.3	7.4	95.6667	138	83	36	85	100.278	69	0	1	1	0	1	1	0	0	0	0						1	2	13.8	8.3	8.5	10.0278	6.9
930	0	48	0	1	1	0	0	0	1	1	1	1	36.41	7.8	7.9	9.6	8.7	5.7	114.667	192	223	59	127	89.3114	27	0	1	0	0	3	0	0	0	1	0						0	1	19.2	22.3	12.7	8.93114	2.7
931	1	41	0	1	1	0	0	1	1	1	1	0	27.85	7.4	7.8	7.8	7.8	8.6	81.6667	218	132	59	123	92.2155	24	0	0	1	0	1	0	0	0	0	0						1	1	21.8	13.2	12.3	9.22155	2.4
932	0	37	0	2	1	0	0	1	1	1	1	0	24.02	7.2	6.5	6.5	6.4	6.6	97.3333	240	107	31	140	116.354	10	0	0	0	0	1	0	0	0	0	0						0	1	24	10.7	14	11.6354	1
933	0	54	0	0	0	0	0	0	1	0	0	0	25.63	6.1	5.8	6	6.4	5.8	96.6667	302	187	58	210	74.7481	18	0	0	1	0	2	0	0	0	0	0						0	1	30.2	18.7	21	7.47481	1.8
934	0	60	1	1	0	0	0	1	1	1	1	1	23.26	7.3	6.7	6.7	6.7	6.3	67.3333	156	160	38	84	51.69	20	0	1	1	0	4	0	1	0	0	0						0	2	15.6	16	8.4	5.169	2
935	0	46	0	3	1	0	0	2	1	#NULL!	#NULL!	1	29.98	7	6.1	6	5.5	5.8	101.667	159	97	48	93	116.545	16	0	1	0	0	4	1	0	0	0	0						0	2	15.9	9.7	9.3	11.6545	1.6
936	0	55	0	2	1	0	0	2	1	1	1	0	24.14	6.6	6.8	6.8	7.5	6.7	70.3333	206	111	46	137	82.77	20	0	0	1	0	1	0	0	0	0	0						0	2	20.6	11.1	13.7	8.277	2
937	0	50	1	2	1	0	0	2	1	1	1	1	27.67	6.4	5.9	6	6	6.1	98.3333	189	125	43	122	108.129	23	0	1	1	0	1	0	0	0	0	0						0	2	18.9	12.5	12.2	10.8129	2.3
938	0	46	0	1	0	0	0	0	1	0	1	0	33.94	7.6	7	6.6	6.6	6.8	101	143	53	47	85	67.1136	62	0	1	0	0	2	0	0	0	0	0						0	1	14.3	5.3	8.5	6.71136	6.2
939	0	51	1	3	1	0	0	2	1	1	1	0	27.4	6.1	5.9	5.7	5.7	5.7	77.3333	121	62	40	59	98.66	19	0	1	1	0	1	0	0	0	0	0						0	2	12.1	6.2	5.9	9.866	1.9
940	1	58	1	1	0	0	0	2	1	0	1	0	28.47	6.9	6.9	6.8	7.4	7.3	104.667	201	168	36	130	60.21	48	0	1	1	1	4	0	0	0	0	0						1	1	20.1	16.8	13	6.021	4.8
941	0	42	1	2	0	0	0	0	1	0	0	0	19	6.4	4.8	4.8	4.9	5.1	81.6667	297	199	61	210	106.011	61	0	1	1	0	2	0	0	0	0	0						0	1	29.7	19.9	21	10.6011	6.1
942	1	32	1	2	1	1	1	0	1	0	1	0	31.14	7.1	6.6	6.6	8.8	8.8	105.667	267	269	60	158	97.7905	109	0	1	1	0	1	0	0	0	0	0						1	1	26.7	26.9	15.8	9.77905	10.9
943	1	43	1	2	1	0	0	0	1	#NULL!	#NULL!	1	19.31	6.1	6.1	6.5	7.3	7.3	70.3333	154	70	43	102	73.0595	12	0	1	0	0	1	0	0	0	0	0						1	1	15.4	7	10.2	7.30595	1.2
944	0	33	1	3	0	1	0	1	0	1	1	1	37.01	7.7	7.4	6.1	6.2	6.1	80	133	239	27	75	111.33	53	0	1	0	0	1	0	0	0	0	0						0	2	13.3	23.9	7.5	11.133	5.3
945	0	33	1	2	1	0	0	2	1	1	1	1	34.4	7.2	5.9	5.9	5.6	6.2	103.333	183	130	34	128	136.61	28	0	0	1	0	2	0	0	0	0	0						0	2	18.3	13	12.8	13.661	2.8
946	0	53	1	2	1	1	0	0	1	1	1	1	32.09	7.5	8.8	8.6	8.6	6.8	94.6667	156	285	42	77	88.2702	34	0	0	0	0	3	0	0	0	0	0						0	1	15.6	28.5	7.7	8.82702	3.4
947	0	47	1	2	1	1	1	0	0	0	1	0	22.59	7.1	7	7.5	7.6	6.2	91	158	166	58	73	85.157	13	2	0	0	1	1	0	0	0	0	0						0	1	15.8	16.6	7.3	8.5157	1.3
948	0	48	0	1	1	0	0	0	1	0	0	0	30.75	7.9	8.7	8.8	6.5	6.8	105	188	127	53	95	76.5569	48	0	1	1	0	1	1	0	0	0	0						0	1	18.8	12.7	9.5	7.65569	4.8
949	0	59	0	0	0	0	0	0	1	0	1	0	28.68	6.8	6.8	6.1	5.7	6.3	111.667	213	275	47	129	64.086	34	0	1	0	0	1	1	0	0	0	0						0	1	21.3	27.5	12.9	6.4086	3.4
950	1	46	1	2	0	0	1	1	1	1	0	0	22.52	7.4	10.3	8.9	8.7	9.7	110.667	225	104	59	138	77.596	25	0	1	1	0	1	0	0	0	0	0						1	1	22.5	10.4	13.8	7.7596	2.5
951	1	52	1	1	1	1	0	0	1	0	1	0	29.36	7.8	7.8	8.1	8.1	7.9	98.6667	143	291	25	80	75.7132	40	0	0	0	1	1	0	0	0	0	0						1	1	14.3	29.1	8	7.57132	4
952	1	63	1	1	0	0	0	2	1	1	0	0	27.58	7.2	7.1	6.9	7.1	7.6	103.667	139	52	50	76	83.8783	54	0	1	1	0	3	1	0	0	0	0						1	2	13.9	5.2	7.6	8.38783	5.4
953	0	51	1	3	1	0	0	2	1	1	0	1	22.12	6.9	6.6	7.2	6.9	6.6	98	200	74	55	140	149.117	23	0	0	1	0	2	0	1	0	0	0						0	1	20	7.4	14	14.9117	2.3
954	0	51	1	1	0	0	0	0	1	0	1	0	30.4	6.2	6	6	6	6	109.667	200	186	34	119	88.6122	33	0	1	0	1	2	0	0	0	0	0						0	1	20	18.6	11.9	8.86122	3.3
955	1	63	0	0	0	0	0	0	1	0	0	0	27.45	7.8	8.5	8.5	8.1	8.2	76.3333	239	215	32	164	91.3259	71	2	1	1	0	2	0	0	0	1	0						1	1	23.9	21.5	16.4	9.13259	7.1
956	0	63	0	1	0	0	0	1	1	1	1	0	27.96	6.8	6.4	6.8	6.6	7	97	227	162	55	134	142.64	18	0	1	1	0	1	0	0	0	0	0						0	2	22.7	16.2	13.4	14.264	1.8
957	0	42	1	2	0	0	0	#NULL!	0	#NULL!	#NULL!	0	34.54	7	5.6	5.5	5.5	5.6	96	199	343	35	107	73.4093	48	0	1	1	1	1	0	0	0	0	0						0	2	19.9	34.3	10.7	7.34093	4.8
958	1	64	1	0	0	0	0	0	1	0	1	0	28.92	7.4	9	7.9	7.9	8.2	101.333	216	154	57	135	55.4021	31	0	1	1	0	2	0	0	0	1	0						1	1	21.6	15.4	13.5	5.54021	3.1
959	0	34	0	3	1	0	0	0	1	1	1	0	23.09	6.5	5.9	6	5.4	5.5	73.3333	214	175	43	118	95.7874	19	0	0	1	0	2	0	0	0	0	0						0	1	21.4	17.5	11.8	9.57874	1.9
960	1	55	1	1	0	0	0	2	1	1	0	0	29.62	6.9	6.9	6.9	6.9	7.2	99.6667	228	297	35	152	67.8104	42	0	0	0	1	1	0	0	0	0	0						1	1	22.8	29.7	15.2	6.78104	4.2
961	0	48	0	1	0	0	0	2	1	1	1	0	33.55	6.9	6.9	7.2	7	6.7	102.667	173	105	63	104	76.5569	53	0	1	1	0	1	0	0	0	0	0						0	1	17.3	10.5	10.4	7.65569	5.3
962	0	33	1	3	1	0	0	1	1	1	1	1	26.07	7.9	6.2	6.2	6.3	6.3	100.333	138	65	43	86	109.746	103	0	0	0	0	1	0	0	0	0	0						0	1	13.8	6.5	8.6	10.9746	10.3
963	0	38	1	3	0	0	0	0	1	1	1	1	27.3	7.3	8	9	6.8	6.4	115.667	196	366	37	100	109.19	91	0	1	1	0	1	0	0	0	0	0						0	2	19.6	36.6	10	10.919	9.1
964	0	35	1	3	0	0	0	0	1	1	1	0	37.16	7	7.4	6.1	6.6	6.8	129.667	176	85	41	117	77.8075	160	0	1	1	0	4	0	0	0	0	0						0	2	17.6	8.5	11.7	7.78075	16
965	0	64	0	1	0	0	0	1	1	1	1	0	23.92	6.5	6.4	6	6	6	91	129	132	33	60	102.618	36	0	1	1	0	1	0	0	0	0	0						0	2	12.9	13.2	6	10.2618	3.6
966	1	50	0	2	0	0	0	#NULL!	0	#NULL!	#NULL!	0	28.58	5.6	6.5	7.9	7.9	7.8	115	200	77	48	118	39.8033	13	2	1	0	0	2	0	0	0	1	0						1	1	20	7.7	11.8	3.98033	1.3
967	1	60	1	1	1	1	0	0	1	0	0	0	20.98	7.4	7.6	7.6	8.5	8.5	100	196	183	46	116	86.0751	19	0	1	0	1	1	0	0	0	0	0						1	1	19.6	18.3	11.6	8.60751	1.9
968	0	57	0	1	0	0	0	0	1	1	1	0	29.63	6.8	6.6	5.6	5.8	5.6	91	191	131	44	122	109.719	70	0	1	0	0	1	0	0	0	0	0						0	2	19.1	13.1	12.2	10.9719	7
969	1	59	0	1	0	0	0	0	1	#NULL!	#NULL!	0	23.03	5.6	7	6.9	6.9	8.5	114.667	175	94	36	103	51.0151	53	0	1	0	0	2	0	0	0	0	0						1	1	17.5	9.4	10.3	5.10151	5.3
970	0	49	0	1	1	0	0	2	1	1	1	0	25.12	6.5	6.5	6.3	5.9	5.4	102.667	135	54	42	73	104.247	12	0	0	0	0	1	0	0	0	0	0						0	2	13.5	5.4	7.3	10.4247	1.2
971	0	59	0	1	0	0	0	0	1	1	1	0	27.84	6	6.5	6.3	7	6.9	118.333	162	117	53	92	88.2596	15	0	0	1	0	2	0	0	0	0	0						0	2	16.2	11.7	9.2	8.82596	1.5
972	0	46	1	2	1	0	0	2	1	0	1	0	25.62	5.8	6.8	6.8	6.8	6.8	98.3333	213	377	34	121	72.0661	40	0	1	1	1	1	0	1	0	0	0						0	1	21.3	37.7	12.1	7.20661	4
973	1	53	0	1	0	0	0	2	1	0	0	0	29.56	6.6	6.6	6.8	10.1	7.6	110	231	120	49	163	65.4965	23	0	1	1	1	1	0	0	0	0	0						1	1	23.1	12	16.3	6.54965	2.3
974	0	45	1	2	1	1	0	0	1	1	0	0	22.59	5.8	5.5	6.1	6.3	6.2	80.3333	188	112	38	114	90.8453	51	0	0	0	0	3	0	0	0	0	0						0	1	18.8	11.2	11.4	9.08453	5.1
975	1	37	0	2	1	0	0	0	1	1	1	1	32.25	7.5	7.4	6.8	7.5	7.1	96.6667	194	134	53	117	149.106	34	0	0	1	0	2	0	0	0	0	0						1	2	19.4	13.4	11.7	14.9106	3.4
976	0	52	0	1	0	0	0	2	0	#NULL!	#NULL!	0	31.58	7.2	6.2	6.2	5.9	6.5	103	202	230	59	107	33.7178	33	0	1	1	0	3	0	0	0	1	0						0	1	20.2	23	10.7	3.37178	3.3
977	0	51	0	1	0	0	0	2	1	1	1	1	25.46	7.8	8.3	6.1	6.1	6.3	86.3333	182	70	59	119	191.459	46	0	0	0	0	1	0	0	0	0	0						0	1	18.2	7	11.9	19.1459	4.6
978	0	56	0	1	0	0	0	2	1	1	1	0	26.48	6.7	6.4	6.4	6.3	6.4	89.6667	139	142	57	63	109.719	23	0	0	1	0	1	0	0	0	0	0						0	2	13.9	14.2	6.3	10.9719	2.3
979	0	60	1	2	0	0	0	0	1	1	1	0	30.92	7.8	5.5	5.5	5.3	5.3	97	225	226	41	140	77.1099	45	0	1	1	0	1	0	0	0	0	0						0	2	22.5	22.6	14	7.71099	4.5
980	0	59	1	1	0	0	0	2	1	1	1	1	27.66	6.2	6.7	7.5	6.7	6.3	90	207	162	46	136	98.6069	16	0	0	1	0	1	0	0	0	0	0						0	1	20.7	16.2	13.6	9.86069	1.6
981	0	60	0	2	1	0	0	0	1	1	1	0	22.34	5.9	5.9	6.1	6.1	5.8	80	131	65	41	74	117.275	22	0	0	1	0	1	0	0	0	0	0						0	2	13.1	6.5	7.4	11.7275	2.2
982	0	54	1	1	0	0	1	0	1	1	1	0	26.22	4.8	5	4.9	4.9	5	79	191	211	67	94	52.8355	19	0	1	1	1	1	0	0	0	0	0						0	1	19.1	21.1	9.4	5.28355	1.9
983	0	59	0	2	0	0	0	0	1	0	1	0	24.33	6.8	6.1	6.4	6.2	6.1	72	169	137	43	97	56.7491	20	0	1	0	0	1	1	1	0	0	0						0	1	16.9	13.7	9.7	5.67491	2
984	1	40	0	2	1	0	0	2	1	0	0	0	30.52	6.6	6.7	7.4	7.4	7.4	96.6667	161	83	61	91	110.723	20	0	0	1	0	2	0	1	0	0	0						1	1	16.1	8.3	9.1	11.0723	2
985	0	64	1	1	0	0	0	2	1	1	1	0	29.74	7.6	8.5	6.9	6.9	6.6	90.6667	190	69	74	111	104.441	32	2	0	0	0	1	0	0	0	0	0						0	1	19	6.9	11.1	10.4441	3.2
986	1	51	0	0	0	0	0	0	1	#NULL!	#NULL!	0	31.09	6.8	7.7	9.7	9.7	8.4	86.6667	175	149	49	86	87.8719	72	0	1	0	0	3	0	0	0	0	0						1	1	17.5	14.9	8.6	8.78719	7.2
987	0	56	0	0	1	0	0	2	1	0	1	0	25.65	6.6	6.1	6.2	6.2	6.2	105.667	184	78	61	104	124.732	16	0	1	0	0	1	0	0	0	0	0						0	1	18.4	7.8	10.4	12.4732	1.6
988	1	39	0	2	0	1	0	2	1	0	0	0	26.94	7.4	6.1	6.1	8.1	8.1	104	264	186	78	156	93.1564	17	0	0	1	0	2	0	0	0	0	0						1	1	26.4	18.6	15.6	9.31564	1.7
989	1	47	0	1	0	0	0	0	1	#NULL!	#NULL!	0	29.26	7.2	6.6	6.6	7.2	7.2	80.3333	151	57	54	89	106.7	17	0	1	0	0	2	0	0	0	0	0						1	1	15.1	5.7	8.9	10.67	1.7
990	0	56	1	3	1	0	0	0	1	#NULL!	#NULL!	0	24.18	5.8	5.7	5.7	5.7	5.5	94.6667	218	127	42	143	62.6298	17	0	0	1	0	2	0	0	0	0	0						0	1	21.8	12.7	14.3	6.26298	1.7
991	0	51	1	1	1	0	0	0	1	1	0	0	24.17	7.9	5.8	5.6	5.8	6	104.333	275	668	43	122	78.4674	21	0	1	1	1	1	0	0	0	0	0						0	1	27.5	66.8	12.2	7.84674	2.1
992	1	62	0	0	0	0	0	0	1	0	0	0	29.1	7.8	8	7.9	7.9	7.6	112	188	95	47	118	104.852	19	0	1	1	0	3	0	0	0	0	0						1	1	18.8	9.5	11.8	10.4852	1.9
993	0	46	1	2	0	0	0	0	1	1	1	0	31.51	6.3	6.2	5.8	5.9	6	88	167	289	41	88	54.3213	63	0	1	1	1	1	0	0	0	0	0						0	1	16.7	28.9	8.8	5.43213	6.3
994	0	59	1	0	1	0	0	0	1	0	1	0	22.09	6.1	6.4	6.2	6.2	6.6	99.3333	183	84	61	101	68.5154	26	0	0	1	0	1	0	0	0	0	0						0	1	18.3	8.4	10.1	6.85154	2.6
995	0	60	0	2	0	0	0	2	1	1	1	0	21.19	5.9	6.2	6.3	6.4	6.3	102.667	135	80	55	68	115.158	24	0	0	1	0	2	0	0	0	0	0						0	2	13.5	8	6.8	11.5158	2.4
996	1	57	0	1	1	0	0	1	1	1	1	0	25.44	7.7	7.7	8.4	8.6	8.2	111.333	150	161	50	76	64.5362	22	0	1	1	0	3	0	0	1	0	0						1	1	15	16.1	7.6	6.45362	2.2
997	1	43	1	2	1	1	1	#NULL!	0	#NULL!	#NULL!	0	26.77	7.6	7.6	10	7.1	7.1	106	242	98	45	148	123.084	216	0	0	0	0	2	0	1	0	0	0						1	1	24.2	9.8	14.8	12.3084	21.6
998	0	45	0	2	1	1	0	2	1	1	1	1	37.19	6.4	6.1	6	6.1	5.6	99	168	133	51	92	100.35	13	2	1	1	0	4	1	0	0	0	0						0	2	16.8	13.3	9.2	10.035	1.3
999	1	62	1	2	0	0	0	0	1	1	1	1	27.97	7.8	9.6	9.6	7.1	7.1	89.3333	179	149	55	100	66.43	23	0	1	1	0	1	0	0	0	0	0						1	2	17.9	14.9	10	6.643	2.3
1000	0	34	1	3	1	0	0	2	1	0	1	0	28.73	7.5	6.3	6.3	6.3	6.3	103.667	177	75	42	106	62.6582	162	0	0	0	0	1	0	0	0	0	0						0	1	17.7	7.5	10.6	6.26582	16.2
1001	1	38	0	2	1	0	0	0	1	0	1	0	16.63	6.5	8.5	7.7	7.7	8.1	68	183	56	80	96	161.004	38	1	0	0	0	3	0	0	0	0	0						1	1	18.3	5.6	9.6	16.1004	3.8
1002	1	55	0	2	0	0	0	#NULL!	0	#NULL!	#NULL!	0	28.44	6.9	6.7	7.4	7.1	7.1	116.667	202	216	40	110	107.415	36	0	1	0	0	3	0	0	0	0	0						1	1	20.2	21.6	11	10.7415	3.6
1003	0	54	1	1	1	1	1	0	1	#NULL!	#NULL!	0	32.45	5.6	5.8	5.7	5.7	5.7	91.6667	262	345	38	165	62.8593	16	0	0	1	1	2	0	0	0	0	0						0	1	26.2	34.5	16.5	6.28593	1.6
1004	1	57	1	2	1	1	0	0	1	0	1	1	25.51	6.2	7.3	7.1	8.7	7.1	87.3333	118	94	42	67	74.4357	30	0	1	1	0	1	0	0	0	0	0						1	1	11.8	9.4	6.7	7.44357	3
1005	1	34	1	1	1	0	0	0	1	0	1	0	29.7	5.9	5.6	5.4	5.4	7.3	110.667	208	243	25	140	63.1913	28	2	0	0	1	1	0	0	0	0	0						1	1	20.8	24.3	14	6.31913	2.8
1006	0	58	1	2	0	0	0	0	1	1	1	0	28.39	6.1	6.2	6	6.2	6.3	106.667	159	157	53	75	95.5375	24	0	1	1	0	2	1	0	0	0	0						0	2	15.9	15.7	7.5	9.55375	2.4
1007	0	64	0	0	0	0	0	#NULL!	0	#NULL!	#NULL!	0	31.65	7.9	6.2	6.4	6.8	6.8	95.3333	144	54	52	72	72.214	47	0	1	0	0	1	1	1	0	0	0						0	1	14.4	5.4	7.2	7.2214	4.7
1008	0	60	0	3	1	0	0	0	1	0	1	0	25.02	5.9	5.8	6	5.7	5.7	94.6667	113	167	32	56	131.598	29	0	1	1	0	1	0	0	0	0	0						0	2	11.3	16.7	5.6	13.1598	2.9
1009	0	50	1	1	0	0	0	2	1	1	1	0	24.8	5.7	6	5.8	6	6	103	150	87	43	88	130.03	26	0	1	1	0	2	0	0	0	0	0						0	2	15	8.7	8.8	13.003	2.6
1010	1	39	1	0	0	0	0	0	1	0	1	1	17.3	7.4	12.7	13.7	11.7	11.2	91.3333	192	127	49	119	1062.39	19	1	0	0	0	1	0	0	0	0	0						1	2	19.2	12.7	11.9	106.239	1.9
1011	0	46	1	2	1	1	0	0	1	1	1	0	22.75	3.1	5.3	5.8	5.5	5.5	90.3333	154	90	49	85	90.4495	16	0	0	0	0	3	0	0	0	0	0						0	1	15.4	9	8.5	9.04495	1.6
1012	0	55	0	1	0	0	0	1	1	1	1	1	21.2	6.1	6.4	6	6.2	5.7	78	167	116	41	85	155.347	18	0	0	1	0	1	0	0	0	0	0						0	1	16.7	11.6	8.5	15.5347	1.8
1013	0	31	1	2	1	0	0	0	1	#NULL!	#NULL!	0	24.77	4.5	5	4.8	5.1	5.2	93	144	122	56	70	130.692	24	0	0	0	0	4	0	0	0	0	0						0	1	14.4	12.2	7	13.0692	2.4
1014	0	59	0	1	1	0	0	2	1	1	1	0	27.37	6.9	5.9	6.5	6.5	6.4	104	177	114	43	115	153.159	29	0	0	1	0	2	0	0	0	0	0						0	1	17.7	11.4	11.5	15.3159	2.9
1015	0	58	0	2	1	0	0	1	1	1	1	0	30.21	6.5	5.9	5.6	6.4	5.5	93.3333	146	102	39	94	150.701	52	0	1	0	0	3	0	0	0	0	0						0	1	14.6	10.2	9.4	15.0701	5.2
1016	0	45	1	2	1	0	0	2	1	1	1	0	27.38	6.9	6.7	6.7	6.8	6.6	99.3333	175	243	49	89	93.6489	51	0	0	1	0	2	0	0	0	0	0						0	2	17.5	24.3	8.9	9.36489	5.1
1017	0	39	1	3	1	1	1	0	1	1	1	0	27.36	7.1	7.5	7.1	7.2	6.9	104	217	162	29	158	101.205	34	0	0	1	0	2	0	0	0	0	0						0	2	21.7	16.2	15.8	10.1205	3.4
1018	0	48	0	2	1	0	0	1	1	0	1	0	22.85	6.7	5.9	6.2	6.2	6.1	86.6667	220	119	52	136	76.8848	35	0	1	1	1	1	0	0	0	0	0						0	1	22	11.9	13.6	7.68848	3.5
1019	0	33	1	2	1	0	0	0	1	1	0	0	24.74	5.8	5.7	5.7	5.5	5.7	104	166	167	38	105	63.1913	64	0	1	0	0	1	0	0	0	0	0						0	1	16.6	16.7	10.5	6.31913	6.4
1020	0	62	1	2	1	0	0	2	1	1	1	1	21.77	4.9	4.7	4.7	4.6	4.8	95.3333	162	108	45	94	61.15	28	0	0	1	0	2	0	0	0	0	0						0	2	16.2	10.8	9.4	6.115	2.8
1021	0	38	1	3	1	0	0	0	1	0	1	0	33.9	5.4	4.7	4.3	5.6	5.6	98.3333	189	143	46	103	89.8826	44	0	1	1	0	1	0	0	0	0	0						0	1	18.9	14.3	10.3	8.98826	4.4
1022	1	53	0	1	1	0	0	0	1	0	1	0	29.04	7.5	8.3	7.8	7.8	7.8	93	304	354	54	191	65.4965	59	0	0	1	0	1	0	0	0	0	0						1	1	30.4	35.4	19.1	6.54965	5.9
1023	0	60	0	1	0	0	0	0	1	1	1	0	31.01	6.8	6.3	5.9	6.7	6.5	101.667	171	92	41	112	152.64	52	0	1	1	0	2	0	0	0	0	0						0	2	17.1	9.2	11.2	15.264	5.2
1024	0	57	0	2	0	0	0	2	1	1	0	1	30.46	7.3	6.1	5.8	5.5	5.8	85.6667	185	196	35	114	86.2494	44	0	1	1	1	1	0	0	0	0	0						0	2	18.5	19.6	11.4	8.62494	4.4
1025	0	57	0	1	0	0	0	0	1	#NULL!	#NULL!	0	29.91	6	6.7	6.2	6.2	6.4	117	210	89	42	145	106.644	48	0	1	1	0	2	0	0	0	0	0						0	1	21	8.9	14.5	10.6644	4.8
1026	0	63	1	1	0	0	0	0	0	0	1	0	26.85	6.6	6.5	6.5	6.9	6.6	88.6667	230	167	42	157	67.609	21	0	0	1	0	1	0	0	0	0	0						0	1	23	16.7	15.7	6.7609	2.1
1027	0	32	1	3	0	0	0	2	1	1	1	0	34.19	6.4	6.2	6.2	6.2	6.3	93.6667	189	94	36	141	131.537	49	0	1	1	0	2	0	0	0	0	0						0	2	18.9	9.4	14.1	13.1537	4.9
1028	0	61	0	2	0	0	0	1	1	1	0	1	27.82	6.9	6.8	7.3	7	7	94.6667	195	123	69	113	77.113	22	0	0	1	0	1	0	0	0	0	0						0	2	19.5	12.3	11.3	7.7113	2.2
1029	0	45	0	2	0	0	0	0	1	#NULL!	#NULL!	0	24.75	5.3	5.6	5.6	5.8	6.1	107.333	183	122	49	108	108.107	15	0	0	0	0	1	0	0	0	1	0						0	1	18.3	12.2	10.8	10.8107	1.5
1030	1	48	0	2	1	0	0	0	1	0	0	0	25.96	7.3	6.6	6.8	6.8	7.1	94.6667	182	239	53	106	106.7	33	0	1	0	0	1	0	0	0	0	0						1	1	18.2	23.9	10.6	10.67	3.3
1031	0	57	0	1	1	0	0	0	1	1	1	0	24.88	6.8	6.5	6.7	6.8	7	103.333	258	203	58	170	140.26	15	0	1	1	0	2	0	0	0	0	0						0	2	25.8	20.3	17	14.026	1.5
1032	0	56	0	2	0	0	0	0	1	1	1	0	35.11	7.5	6.4	6	6.2	6.1	132	190	123	49	122	35.9212	28	0	1	0	0	2	0	0	0	0	0						0	1	19	12.3	12.2	3.59212	2.8
1033	0	53	1	1	0	0	0	#NULL!	0	#NULL!	#NULL!	0	29.46	6.6	6.4	5.7	5.7	5.7	100	130	157	37	71	88.2702	35	0	0	0	1	4	0	0	0	0	0						0	1	13	15.7	7.1	8.82702	3.5
1034	0	43	0	2	1	0	0	2	1	#NULL!	#NULL!	1	33.57	7.1	6.6	6.5	6.3	6.3	122.667	163	73	53	99	122.64	41	0	0	0	0	1	0	0	0	0	0						0	2	16.3	7.3	9.9	12.264	4.1
1035	0	55	0	0	0	0	0	0	1	0	1	0	30.46	7.5	6.7	6.2	6.2	5.9	97.6667	134	79	50	75	65.0059	69	0	0	0	0	3	0	0	0	0	0						0	1	13.4	7.9	7.5	6.50059	6.9
1036	0	45	1	3	1	0	0	1	1	1	1	1	23.73	7	6.5	6.2	6.2	6	74	203	144	40	142	75.5497	20	0	0	1	0	1	0	1	0	0	0						0	2	20.3	14.4	14.2	7.55497	2
1037	0	47	1	2	0	0	0	2	1	1	1	1	23.11	6.6	6.6	6.3	6.4	6.1	82.3333	212	183	37	147	71.7522	20	0	0	1	0	2	0	0	0	0	0						0	1	21.2	18.3	14.7	7.17522	2
1038	0	57	1	1	1	0	0	0	1	0	0	0	27.39	6.7	7.6	7.4	7.2	6.4	94	158	197	36	89	41.6029	42	0	1	1	0	1	0	0	0	0	0						0	1	15.8	19.7	8.9	4.16029	4.2
1039	0	53	1	2	0	0	0	0	1	0	1	0	26.53	6.4	5.9	6.1	6	5.9	86.6667	211	94	48	139	126.384	18	0	1	1	0	1	0	0	0	0	0						0	1	21.1	9.4	13.9	12.6384	1.8
1040	0	52	1	2	1	0	1	1	1	0	1	1	20.66	6.3	5.6	5.6	5.7	5.4	86	190	87	51	122	78.1646	8	0	1	0	0	1	0	0	0	0	0						0	1	19	8.7	12.2	7.81646	0.8
1041	0	39	1	2	0	0	1	0	1	0	1	0	26.63	5.6	6	6	5.7	5.4	110.333	186	238	37	112	72.6394	21	0	1	0	0	1	0	0	0	0	0						0	1	18.6	23.8	11.2	7.26394	2.1
1042	0	57	1	2	0	1	0	2	1	0	1	0	24.84	7.3	5.6	5.4	5.9	5.9	93.3333	141	154	27	89	118.185	22	0	0	0	0	1	0	0	0	0	0						0	1	14.1	15.4	8.9	11.8185	2.2
1043	0	51	0	1	0	0	0	0	1	1	1	0	23.82	6.3	6	6.1	6.3	6.2	83	172	114	44	102	167.616	16	0	0	1	0	1	0	0	0	0	0						0	2	17.2	11.4	10.2	16.7616	1.6
1044	0	59	0	0	1	0	0	1	1	1	1	1	24.16	6.8	7	7	6.9	7	97	246	75	62	160	67.3079	14	0	0	1	0	1	0	0	0	0	0						0	1	24.6	7.5	16	6.73079	1.4
1045	0	62	0	0	0	0	0	0	1	0	0	0	25.67	5.9	6.3	6.7	6.7	5.7	92.6667	167	165	61	74	56.1806	85	0	0	1	1	2	0	0	0	0	0						0	1	16.7	16.5	7.4	5.61806	8.5
1046	0	63	0	2	1	0	0	2	1	1	0	0	24.52	6.2	6.6	6.7	5.9	6.3	105.667	148	98	42	90	72.4453	34	0	1	0	0	4	0	0	0	1	0						0	2	14.8	9.8	9	7.24453	3.4
1047	0	49	0	2	0	0	0	2	1	0	1	0	27.19	7.2	6.1	6.1	6.3	6.3	84.6667	195	135	63	120	76.2371	20	0	1	0	0	1	0	0	0	0	0						0	1	19.5	13.5	12	7.62371	2
1048	1	47	0	2	0	0	0	2	1	#NULL!	#NULL!	0	30.33	7	7.4	7.1	7.5	7.1	93.3333	249	159	51	172	86.82	14	0	1	1	0	4	1	0	0	0	0						1	2	24.9	15.9	17.2	8.682	1.4
1049	1	40	1	3	1	0	0	2	1	1	1	0	32.91	7.1	7.5	7.3	7.3	7.1	113.333	137	218	40	69	67.4026	54	0	1	1	0	1	0	0	0	0	0						1	1	13.7	21.8	6.9	6.74026	5.4
1050	1	45	0	3	1	0	0	0	1	1	1	0	32.81	6.9	6.9	6.6	7	7.2	117.333	106	84	41	46	109.73	43	0	0	1	0	3	1	0	0	0	0						1	2	10.6	8.4	4.6	10.973	4.3
1051	0	61	1	1	0	0	0	2	1	1	1	0	24.66	6	6	6	5.9	5.9	111	291	1356	36	64	32.1619	18	0	1	1	1	3	0	0	0	0	0						0	1	29.1	135.6	6.4	3.21619	1.8
1052	0	38	0	2	1	0	0	1	1	1	1	0	35.39	7.8	6.3	6.3	6.5	6.4	97	154	158	35	96	100.77	52	0	1	0	0	2	0	0	0	0	0						0	2	15.4	15.8	9.6	10.077	5.2
1053	1	55	1	1	0	0	1	0	1	1	1	0	28.73	6.7	8.8	8.5	7.1	7.5	98	333	2019	30	18	62.8593	57	2	1	0	1	4	0	0	0	0	0						1	1	33.3	201.9	1.8	6.28593	5.7
1054	0	50	0	0	0	0	0	1	1	0	1	0	30.15	6.7	6.6	6.9	6.3	6.6	102.333	212	137	55	137	127.618	16	0	0	1	0	1	0	0	0	0	0						0	1	21.2	13.7	13.7	12.7618	1.6
1055	1	51	0	1	0	0	0	2	1	0	1	0	24.14	7.4	8.3	7.1	7.3	7.7	99.3333	151	91	47	82	151.712	26	0	0	0	0	1	0	0	0	0	0						1	1	15.1	9.1	8.2	15.1712	2.6
1056	0	56	1	2	0	1	1	0	1	1	1	1	27.53	7.7	6.1	5.9	6	5.9	97.6667	163	166	39	101	88.42	53	0	1	1	0	4	1	0	0	0	0						0	2	16.3	16.6	10.1	8.842	5.3
1057	0	32	0	3	1	0	0	1	1	1	1	1	27.3	7.7	6	5.9	5.7	5.7	80.3333	135	78	45	84	102.001	46	0	0	0	0	1	0	0	0	0	0						0	2	13.5	7.8	8.4	10.2001	4.6
1058	1	46	0	2	1	0	0	0	1	1	1	0	28.61	7.8	6.9	6.8	6.8	7.1	94.6667	121	126	37	64	149.183	16	0	0	0	0	1	0	0	0	0	0						1	2	12.1	12.6	6.4	14.9183	1.6
1059	0	62	1	3	0	0	1	2	1	#NULL!	#NULL!	0	32.8	5.9	6	6.1	5.8	5.6	91	142	119	43	79	70.0283	31	0	1	1	0	2	1	0	0	0	0						0	2	14.2	11.9	7.9	7.00283	3.1
1060	0	64	0	1	1	0	0	2	1	1	1	0	29.58	7.4	7	7	7	6.4	113.333	173	109	51	97	80.01	27	0	1	0	0	1	0	0	0	0	0						0	2	17.3	10.9	9.7	8.001	2.7
1061	1	41	1	3	1	0	0	0	1	1	1	0	23.27	7	7.3	7.3	8.6	7.5	102	158	150	38	94	106.53	29	0	0	1	0	2	0	0	0	0	0						1	2	15.8	15	9.4	10.653	2.9
1062	0	46	0	1	1	0	0	0	1	0	1	1	23.53	7.1	7	7	6.6	6.6	80.6667	143	135	45	82	107.157	29	0	0	1	0	2	0	0	0	0	0						0	2	14.3	13.5	8.2	10.7157	2.9
1063	1	45	1	2	0	0	0	2	1	0	1	0	28.07	7.8	8.2	8	8	9	103	148	143	44	74	65.1813	24	1	1	1	1	4	0	0	0	0	0						1	1	14.8	14.3	7.4	6.51813	2.4
1064	1	42	1	2	1	1	0	0	1	0	1	0	23.14	7.7	7.7	7.7	7.7	7.1	85.3333	159	24	65	87	106.011	17	0	0	0	0	1	0	0	0	0	0						1	1	15.9	2.4	8.7	10.6011	1.7
1065	1	51	0	3	1	0	0	0	1	1	1	0	29.73	6.8	7.4	8.2	6.3	7.3	97.3333	200	190	48	120	112.274	182	0	1	1	0	4	0	0	0	0	0						1	2	20	19	12	11.2274	18.2
1066	0	61	0	2	0	0	0	0	1	0	1	0	23.73	5.9	6.2	6.2	6.1	6.4	104.667	142	91	63	65	105.196	7	0	1	1	0	1	1	1	0	0	0						0	1	14.2	9.1	6.5	10.5196	0.7
1067	0	60	1	2	1	0	0	0	1	1	1	0	27.85	6.4	6.5	6.5	6.5	6.6	104	224	137	53	126	56.3096	19	0	1	0	0	2	0	0	0	0	0						0	1	22.4	13.7	12.6	5.63096	1.9
1068	0	63	0	2	1	0	0	2	1	1	1	0	29.06	6.7	6.8	6.7	6.6	6.3	82	141	105	42	81	104.998	50	0	1	1	0	2	0	1	0	0	0						0	2	14.1	10.5	8.1	10.4998	5
1069	1	56	1	2	1	1	0	0	1	1	0	0	25.91	7.4	9.4	8	7.7	7.9	100.667	182	188	34	113	77.0186	49	0	1	1	0	1	0	0	0	0	0						1	1	18.2	18.8	11.3	7.70186	4.9
1070	0	53	0	1	0	0	0	2	1	1	1	0	21.58	6.1	6.8	6.9	6.3	6.7	113	213	109	71	119	104.575	15	0	1	1	0	3	0	1	0	0	0						0	1	21.3	10.9	11.9	10.4575	1.5
1071	1	58	0	0	1	0	0	0	1	1	1	0	26.53	6.9	7.3	7.7	7.2	7.3	101.333	191	132	41	127	73.6716	25	0	0	0	1	2	0	0	0	0	0						1	1	19.1	13.2	12.7	7.36716	2.5
1072	0	63	1	3	1	0	0	0	1	1	1	1	26.1	5.9	6	6.1	6	6.1	83	101	72	39	41	60.5672	11	0	1	1	0	1	0	0	0	0	0						0	2	10.1	7.2	4.1	6.05672	1.1
1073	0	53	1	1	0	0	0	#NULL!	0	#NULL!	#NULL!	0	25	5.8	5.7	6	5.8	5.8	83	243	101	63	139	57.7457	16	0	1	1	0	1	0	0	0	0	0						0	1	24.3	10.1	13.9	5.77457	1.6
1074	0	59	1	1	0	1	0	0	1	0	1	0	23.88	5.9	8	8	6.6	6.5	100	179	208	31	101	82.2887	18	0	0	0	0	2	0	0	0	0	0						0	1	17.9	20.8	10.1	8.22887	1.8
1075	0	59	1	1	0	0	0	0	1	0	0	0	26.32	5.5	5.4	6.1	6.3	6.7	115.667	184	216	37	99	68.5154	17	1	1	0	0	3	0	0	0	1	0						0	1	18.4	21.6	9.9	6.85154	1.7
1076	0	35	1	3	0	0	0	0	1	0	1	0	32	7.3	7.3	6.4	6	5.8	104.333	184	366	33	108	117.923	140	0	0	0	1	3	0	0	0	0	0						0	1	18.4	36.6	10.8	11.7923	14
1077	1	52	1	1	0	0	0	0	1	#NULL!	#NULL!	0	27.65	7	8.9	8.6	8.6	7.4	108.333	203	119	81	94	88.2702	80	0	0	1	1	2	0	0	0	0	0						1	1	20.3	11.9	9.4	8.82702	8
1078	0	34	1	2	1	0	0	2	1	1	1	0	35.01	6.6	5.7	5.7	5.7	5.5	96.6667	195	397	33	112	91.9123	62	0	1	0	1	1	0	1	0	0	0						0	1	19.5	39.7	11.2	9.19123	6.2
1079	0	53	1	1	1	0	0	0	1	#NULL!	#NULL!	0	20.83	5.5	5.7	5.7	5.8	6	90.3333	171	88	47	94	31.4669	22	0	1	0	0	1	1	0	0	0	0						0	1	17.1	8.8	9.4	3.14669	2.2
1080	0	57	0	0	0	0	0	2	1	0	1	0	21.1	6	8	6.1	6.4	6	110	200	108	57	104	127.171	31	2	0	0	0	3	0	0	0	0	0						0	1	20	10.8	10.4	12.7171	3.1
1081	1	35	0	2	1	0	0	0	1	0	1	0	27.89	7.3	7.8	7.6	7.3	7.5	111	232	86	48	163	117.665	43	0	0	1	0	1	0	0	0	0	0						1	1	23.2	8.6	16.3	11.7665	4.3
1082	1	44	1	2	1	1	0	0	1	0	1	0	26.97	7.6	9.9	9.9	8.4	8.7	108.667	301	202	55	185	54.803	26	0	1	1	0	3	0	0	0	0	0						1	1	30.1	20.2	18.5	5.4803	2.6
1083	1	38	0	2	1	0	0	0	1	0	1	0	20.5	7.9	6.4	6.1	7	7.6	79.3333	143	187	34	64	80.2749	11	0	0	0	0	1	0	0	0	0	0						1	1	14.3	18.7	6.4	8.02749	1.1
1084	0	42	0	3	0	0	0	0	1	1	1	0	27.26	7.5	6.3	6.2	7.2	6.9	91	202	133	57	124	132.189	36	0	0	0	0	2	0	0	0	0	0						0	1	20.2	13.3	12.4	13.2189	3.6
1085	0	42	0	2	1	0	0	0	1	0	1	0	37.74	7.8	5.7	5.8	6.1	6.5	99.3333	133	87	51	70	77.5409	23	0	1	0	0	1	0	0	0	0	0						0	1	13.3	8.7	7	7.75409	2.3
1086	0	44	1	2	1	1	1	0	1	0	1	0	29.57	6.6	6.6	6.6	6.8	6.4	92	176	225	47	93	72.3884	25	0	1	0	0	1	0	0	0	0	0						0	1	17.6	22.5	9.3	7.23884	2.5
1087	0	50	1	1	1	0	0	2	1	0	0	0	22.67	7.4	7.7	6.1	5.7	5.7	86	173	52	75	85	119.372	82	0	0	0	0	1	0	0	0	0	0						0	1	17.3	5.2	8.5	11.9372	8.2
1088	0	36	1	3	1	0	0	0	1	1	1	0	28.24	6.5	6.2	5.9	5.9	5.7	105.333	162	133	44	94	85.0196	30	0	0	1	0	2	0	0	0	0	0						0	2	16.2	13.3	9.4	8.50196	3
1089	0	48	1	2	1	0	0	1	1	0	1	0	32.42	7.3	5.6	5.6	5.6	5.6	95.6667	166	276	38	92	79.4197	24	0	1	0	0	1	0	0	0	0	0						0	1	16.6	27.6	9.2	7.94197	2.4
1090	0	45	1	3	1	1	0	2	1	1	1	0	19.75	7.2	6.3	6.1	6.3	6.6	76.3333	159	54	69	81	72.3884	9	0	0	0	0	1	0	0	0	0	0						0	1	15.9	5.4	8.1	7.23884	0.9
1091	1	56	0	0	0	0	0	2	1	0	1	0	23.39	6.7	7.3	7.3	9.5	8	97.3333	241	128	57	155	74.1983	17	0	1	1	0	1	0	0	0	0	0						1	1	24.1	12.8	15.5	7.41983	1.7
1092	0	56	0	0	1	0	0	0	1	0	1	0	32.25	5.8	5.7	5.6	5.9	5.9	100	252	153	39	178	124.732	24	0	1	1	0	1	1	0	0	0	0						0	1	25.2	15.3	17.8	12.4732	2.4
1093	0	56	1	2	0	0	0	0	1	0	1	0	24.77	7.7	7	7.6	7	6.7	80	122	39	36	74	62.6298	20	0	0	0	0	1	0	0	0	0	0						0	1	12.2	3.9	7.4	6.26298	2
1094	0	48	0	2	1	0	0	2	1	1	1	1	24.22	6.1	6	5.9	6	5.7	98.6667	128	72	39	70	156.066	16	0	1	0	0	1	0	0	0	0	0						0	2	12.8	7.2	7	15.6066	1.6
1095	0	53	1	3	0	0	0	0	1	#NULL!	#NULL!	1	25.99	7.4	6.1	6.5	6.9	6.6	106	160	187	31	100	135.7	19	0	0	1	0	2	1	0	0	0	0						0	2	16	18.7	10	13.57	1.9
1096	1	55	1	3	1	0	1	1	1	1	1	1	24.88	6.8	6.7	6.9	7	7.1	100.667	118	85	47	55	108.124	16	0	1	1	0	2	1	0	0	0	0						1	2	11.8	8.5	5.5	10.8124	1.6
1097	1	55	0	1	1	0	0	2	1	1	1	0	26.3	7.3	7.3	7.3	8.3	7.4	112	169	254	46	95	74.4702	26	0	0	0	0	1	0	0	0	0	0						1	1	16.9	25.4	9.5	7.44702	2.6
1098	0	43	0	3	1	0	0	0	1	1	1	0	25.83	4.6	4.7	4.6	4.6	4.9	88	220	219	28	146	131.617	21	0	0	0	1	1	0	0	0	0	0						0	2	22	21.9	14.6	13.1617	2.1
1099	1	64	1	1	0	0	0	0	1	0	0	0	26.64	6.4	5.6	6.3	6.4	7.3	90.3333	175	103	45	109	60.7633	38	0	0	0	0	1	0	0	0	0	0						1	1	17.5	10.3	10.9	6.07633	3.8
1100	0	36	1	3	1	0	0	1	1	1	1	1	36.65	7.5	7.5	5.7	5.7	5.7	80	179	100	36	130	117.839	79	0	1	1	0	2	0	0	0	0	0						0	2	17.9	10	13	11.7839	7.9
1101	0	47	0	2	0	0	0	1	1	1	1	1	24.68	7.5	6.9	6	6	6.3	99	224	53	57	143	99.4659	40	0	0	1	0	1	0	0	0	0	0						0	2	22.4	5.3	14.3	9.94659	4
1102	0	60	1	1	1	0	0	0	1	0	0	0	26.44	6.4	6.8	7.1	7.2	6.4	100.667	210	118	47	145	82.0118	14	0	0	1	0	1	0	0	0	0	0						0	1	21	11.8	14.5	8.20118	1.4
1103	1	51	0	1	1	0	0	0	1	0	0	0	27.7	7.9	8.2	8.3	9	8.4	93	255	88	80	128	151.712	92	0	1	1	0	3	0	0	0	0	0						1	1	25.5	8.8	12.8	15.1712	9.2
1104	0	46	0	3	0	0	0	2	1	1	1	0	24.85	7.5	6.8	6.9	6.4	6.5	106.333	126	103	38	66	91.59	26	0	1	1	0	1	0	0	0	0	0						0	2	12.6	10.3	6.6	9.159	2.6
1105	1	48	1	2	0	0	1	0	1	0	1	0	30.47	7.8	8.2	8.1	7.7	8.9	113	169	136	55	92	64.6206	62	0	1	0	0	1	0	0	0	0	0						1	1	16.9	13.6	9.2	6.46206	6.2
1106	1	54	0	1	0	0	0	2	1	1	1	0	26.57	7	5.5	7.3	7.4	8.2	98.3333	151	79	62	76	74.7481	47	0	1	1	0	2	0	0	0	0	0						1	1	15.1	7.9	7.6	7.47481	4.7
1107	0	41	0	3	1	0	0	1	1	1	1	1	29.48	5.6	5.3	5.5	5.7	5.7	82	184	174	33	121	114.56	27	0	1	0	0	1	0	0	0	0	0						0	2	18.4	17.4	12.1	11.456	2.7
1108	0	58	1	2	0	0	0	2	1	1	0	0	22.21	6.5	4.5	4.5	4.7	4.6	97.3333	176	99	64	99	76.7471	30	0	0	0	0	3	0	0	0	0	0						0	1	17.6	9.9	9.9	7.67471	3
1109	0	62	1	1	1	0	1	1	1	1	1	1	28.42	7.9	7.9	6.6	6.6	6.9	100.667	224	177	41	144	112.417	60	0	1	1	0	1	1	0	0	0	0						0	2	22.4	17.7	14.4	11.2417	6
1110	0	32	1	3	1	0	0	1	1	1	1	0	28.37	6.6	6.8	6.3	6.3	6.1	96	175	130	41	116	106.286	42	0	0	1	0	2	0	0	0	0	0						0	2	17.5	13	11.6	10.6286	4.2
1111	0	41	1	2	1	0	0	0	1	0	1	0	24.17	6	5.6	5.6	5.6	5.8	82.3333	194	264	38	119	88.5221	41	0	0	1	1	3	0	0	0	0	0						0	1	19.4	26.4	11.9	8.85221	4.1
1112	1	40	0	2	1	0	0	0	1	0	1	0	23.41	7.9	7.1	7.9	7.8	7.4	106.333	166	85	54	104	110.723	31	0	1	1	0	1	0	0	0	0	0						1	1	16.6	8.5	10.4	11.0723	3.1
1113	0	57	1	2	1	0	0	1	1	1	1	1	20.77	6.1	6	6.3	6.2	6	107.667	158	97	36	97	59.32	39	2	1	0	0	4	0	0	0	1	0						0	2	15.8	9.7	9.7	5.932	3.9
1114	0	62	1	1	0	0	1	0	1	1	1	0	27.85	7.1	6.9	6.5	6.5	6.3	96.3333	200	125	35	141	81.4743	51	0	1	1	0	4	0	1	0	1	0						0	1	20	12.5	14.1	8.14743	5.1
1115	0	61	1	2	0	0	0	0	1	1	1	0	30.37	6.3	6.2	6.2	5.9	6.2	101	154	86	45	86	105.875	39	0	1	1	0	3	1	0	1	0	0						0	2	15.4	8.6	8.6	10.5875	3.9
1116	0	53	0	1	0	0	0	2	1	1	1	0	30.13	7.5	6.9	7.1	6.6	6.3	97.3333	190	240	63	99	44.0174	7	0	1	1	0	1	0	0	0	0	0						0	1	19	24	9.9	4.40174	0.7
1117	1	51	0	1	0	0	0	0	1	0	0	0	30.11	7.1	6.8	6.8	7.7	7.7	114.333	196	83	50	114	58.4528	53	0	0	1	0	3	0	0	0	0	0						1	1	19.6	8.3	11.4	5.84528	5.3
1118	1	63	0	1	0	0	0	0	1	#NULL!	#NULL!	0	29.78	6.7	6.2	6.7	6.9	7.3	88.3333	205	145	62	125	72.4453	61	0	0	0	0	1	0	0	0	0	0						1	1	20.5	14.5	12.5	7.24453	6.1
1119	0	44	0	1	1	0	0	0	1	1	1	0	26.29	6	5.9	6	6	5.7	83.3333	153	45	53	86	90.9029	12	0	0	1	0	1	0	0	0	0	0						0	1	15.3	4.5	8.6	9.09029	1.2
1120	1	63	1	1	0	0	0	1	1	0	1	0	25.9	6.3	6.9	7	7	7.8	110	227	205	35	158	75.4696	20	0	1	1	0	4	0	0	1	0	0						1	1	22.7	20.5	15.8	7.54696	2
1121	0	56	1	1	1	0	0	0	1	0	1	0	27.82	5.8	5.8	5	5.6	5.6	99.3333	132	171	30	75	77.2958	17	0	0	0	0	1	0	0	0	0	0						0	1	13.2	17.1	7.5	7.72958	1.7
1122	1	45	0	2	1	0	0	2	1	1	1	1	34.23	6.6	6.7	6.7	7	7.3	105.667	179	202	43	115	98.5684	57	0	1	1	0	3	0	0	0	0	0						1	2	17.9	20.2	11.5	9.85684	5.7
1123	0	60	0	0	0	0	0	2	1	1	1	0	42.89	7.2	6.4	6.6	6.8	6.7	92.3333	191	201	42	139	49.1162	56	0	1	1	0	3	0	0	1	0	0						0	1	19.1	20.1	13.9	4.91162	5.6
1124	0	58	0	1	0	0	0	2	1	1	0	0	33.09	6.5	6.3	6.9	7.3	6.9	91.6667	231	113	44	163	156.79	46	0	0	1	0	2	1	0	0	0	0						0	2	23.1	11.3	16.3	15.679	4.6
1125	0	54	0	1	0	0	0	0	1	0	0	0	35.35	6.2	6.4	6.4	6.4	6.5	102	229	151	52	153	104.179	13	0	0	1	0	1	0	0	0	0	0						0	1	22.9	15.1	15.3	10.4179	1.3
1126	1	56	0	0	0	0	0	0	1	0	1	0	26.53	7.3	7.2	7.2	8	8	105.667	247	177	59	135	64.7685	21	0	1	1	1	1	0	0	0	0	0						1	1	24.7	17.7	13.5	6.47685	2.1
1127	1	43	0	1	0	0	0	0	1	0	0	0	24.89	7.8	7.6	7.3	7.6	7.1	94	244	146	62	171	157.032	46	0	1	1	0	1	0	0	0	0	0						1	1	24.4	14.6	17.1	15.7032	4.6
1128	0	64	0	1	0	0	0	1	1	1	1	1	26	7.3	6.5	6.5	6.4	6.3	115	182	139	36	128	80.26	41	0	1	1	1	3	0	0	0	0	0						0	2	18.2	13.9	12.8	8.026	4.1
1129	0	55	1	3	1	0	0	2	1	0	0	1	23.12	5.8	5.9	5.8	5.6	6.2	94.3333	175	118	53	113	99.9977	37	0	0	1	0	1	0	0	0	0	0						0	1	17.5	11.8	11.3	9.99977	3.7
1130	0	63	0	1	0	0	0	0	1	1	1	0	43.92	5.5	5.6	5.6	5.6	5.6	97.3333	172	48	50	108	111.278	12	0	0	1	0	3	0	0	0	0	0						0	2	17.2	4.8	10.8	11.1278	1.2
1131	0	64	0	1	0	0	0	1	1	1	1	0	33.26	7	6.3	6.3	6.5	6.5	85.3333	182	307	36	85	62.8383	38	0	1	1	0	2	1	0	0	0	0						0	2	18.2	30.7	8.5	6.28383	3.8
1132	0	42	1	3	1	0	0	1	1	1	1	0	25.94	6.4	6.5	6.4	6.3	6.4	89.3333	98	152	34	39	71.5697	15	0	1	0	0	1	0	0	0	0	0						0	1	9.8	15.2	3.9	7.15697	1.5
1133	0	51	0	1	1	0	0	0	1	1	1	0	28.46	7.3	6.4	6.6	6.3	6.4	99.6667	228	111	46	154	205.884	56	0	0	1	0	1	0	0	0	0	0						0	2	22.8	11.1	15.4	20.5884	5.6
1134	0	56	1	1	0	1	0	1	1	0	0	0	25.06	7.8	6	5.2	4.7	4.4	104	193	118	47	120	93.7758	14	0	1	0	0	1	0	0	1	0	0						0	1	19.3	11.8	12	9.37758	1.4
1135	0	55	1	2	0	0	0	0	1	#NULL!	#NULL!	0	22.88	7.8	4.8	5.5	5.5	5.5	94.6667	208	149	47	144	41.2135	40	0	1	0	0	2	0	0	0	0	0						0	1	20.8	14.9	14.4	4.12135	4
1136	0	42	0	2	0	0	0	0	1	1	0	0	29.38	7.2	7.4	7.4	6.5	7	85.6667	153	85	60	73	132.189	13	0	0	0	0	3	0	0	0	0	0						0	1	15.3	8.5	7.3	13.2189	1.3
1137	1	58	0	1	0	0	0	0	1	1	1	1	33.86	7.4	7.3	7.3	7.4	7.4	114	213	258	53	121	70.6074	24	0	1	1	0	3	0	0	0	0	0						1	2	21.3	25.8	12.1	7.06074	2.4
1138	0	51	1	1	0	1	1	0	0	0	0	0	24.58	5.8	6.2	6.2	6.7	6.7	88.6667	278	543	22	169	70.2946	19	0	0	0	1	1	0	0	0	0	0						0	1	27.8	54.3	16.9	7.02946	1.9
1139	0	62	0	1	0	0	0	0	1	0	1	0	26.96	6.6	6.7	6.1	6.1	5.6	97.3333	173	117	48	101	63.444	24	0	0	1	0	2	0	0	1	0	0						0	1	17.3	11.7	10.1	6.3444	2.4
1140	0	63	1	1	1	0	0	2	1	1	0	0	25.74	6.8	5.9	5.5	5.6	5.7	91.6667	143	80	33	91	88.2203	16	0	0	0	0	1	0	0	0	0	0						0	2	14.3	8	9.1	8.82203	1.6
1141	1	55	1	1	1	0	0	1	1	1	1	0	27.48	7.1	7.5	7.2	6.9	7.1	93.6667	209	138	41	151	77.2624	32	0	1	1	0	1	0	0	0	0	0						1	2	20.9	13.8	15.1	7.72624	3.2
1142	0	58	1	2	0	0	0	2	1	1	1	0	29.95	6.5	6.4	6.8	6.7	6.3	111.667	206	168	45	114	67.3387	40	0	1	1	1	1	0	0	0	0	0						0	2	20.6	16.8	11.4	6.73387	4
1143	0	61	1	1	1	0	0	1	1	1	1	0	27.43	6.5	6.2	6.7	6.8	6.7	100.667	137	160	33	78	43.08	20	0	1	1	0	3	0	0	0	0	0						0	2	13.7	16	7.8	4.308	2
1144	0	48	1	3	0	0	0	1	1	1	1	1	33.06	6.3	5.9	6.1	5.9	5.9	103.667	184	219	49	102	83.5998	70	0	1	1	0	1	0	0	0	0	0						0	2	18.4	21.9	10.2	8.35998	7
1145	0	50	1	2	0	0	0	0	1	0	0	0	21.08	6.3	6.2	7	7.1	7	103.667	228	145	54	147	79.0947	20	0	1	1	0	1	0	0	0	0	0						0	1	22.8	14.5	14.7	7.90947	2
1146	1	56	0	0	0	0	0	0	1	0	1	0	22.67	7.4	7.1	7.2	7.2	7.6	97.3333	222	83	97	98	86.5599	24	0	1	1	0	1	0	1	0	0	0						1	1	22.2	8.3	9.8	8.65599	2.4
1147	0	53	1	1	1	0	0	0	1	0	0	0	27.72	6.5	6	6.2	6.2	6.6	113.667	211	176	47	120	62.3754	52	0	1	1	0	1	0	0	0	0	0						0	1	21.1	17.6	12	6.23754	5.2
1148	1	63	1	1	0	0	0	2	1	1	1	1	28.39	7.3	6.3	6.4	6.2	7.2	98.3333	116	44	37	64	128.627	257	0	1	0	0	4	0	0	0	0	0						1	2	11.6	4.4	6.4	12.8627	25.7
1149	0	58	1	1	0	0	0	#NULL!	0	#NULL!	#NULL!	0	26.34	6	5.6	5.9	5.9	5.9	80.6667	190	109	49	113	62.1852	34	0	0	1	1	2	0	0	0	0	0						0	1	19	10.9	11.3	6.21852	3.4
1150	0	49	0	2	0	1	0	0	1	1	1	0	25.08	6.3	6.4	6.3	7.1	6.8	87	253	195	45	142	75.9251	31	0	0	1	0	1	0	0	0	0	0						0	1	25.3	19.5	14.2	7.59251	3.1
1151	0	59	0	1	1	0	0	2	1	1	1	0	23.61	6	6	5.7	5.8	5.6	90.3333	175	106	37	113	107.443	25	0	0	0	0	3	0	0	0	0	0						0	2	17.5	10.6	11.3	10.7443	2.5
1152	0	50	0	1	1	0	0	0	0	#NULL!	#NULL!	0	21.42	6.1	6.4	6.4	6.4	6.4	100.667	115	167	37	55	88.5743	22	0	1	0	0	3	0	0	0	0	0						0	1	11.5	16.7	5.5	8.85743	2.2
1153	0	62	1	3	0	0	0	2	1	1	1	0	23.77	6.9	6	6.2	6	6	92	108	69	47	46	86.61	13	0	0	1	0	2	0	0	0	0	0						0	2	10.8	6.9	4.6	8.661	1.3
1154	0	45	0	2	1	0	0	1	1	0	1	0	29.86	5.5	6	5.8	10.4	5.9	101.333	231	241	54	126	77.2212	20	0	0	1	1	1	0	0	0	0	0						0	1	23.1	24.1	12.6	7.72212	2
1155	0	55	1	1	0	1	0	0	1	1	0	0	29.3	7.1	6.4	6.9	6.9	6.7	117.667	210	448	45	92	61.9156	96	0	1	1	1	3	0	0	0	0	0						0	1	21	44.8	9.2	6.19156	9.6
1156	0	49	1	1	0	0	0	0	1	0	1	0	29.33	6.2	6	6	5.9	6.1	101.333	271	210	48	172	89.3205	44	0	0	1	0	3	0	0	0	0	0						0	1	27.1	21	17.2	8.93205	4.4
1157	0	52	0	1	1	0	0	0	1	#NULL!	#NULL!	0	24.97	6.8	6.2	5.6	6.1	5.8	98	198	366	41	109	87.8719	31	0	1	0	0	3	0	0	0	0	0						0	1	19.8	36.6	10.9	8.78719	3.1
1158	0	61	0	1	0	0	0	0	1	#NULL!	#NULL!	0	35.6	6.4	7.6	6.7	6.9	6.2	97	198	167	46	109	81.4824	18	0	1	1	0	1	0	0	0	1	0						0	1	19.8	16.7	10.9	8.14824	1.8
1159	0	45	1	3	1	0	1	2	1	1	1	0	23.58	6.1	6.1	6.1	6.2	6.4	99	185	322	41	53	124.491	17	0	1	1	1	2	1	0	0	0	0						0	2	18.5	32.2	5.3	12.4491	1.7
1160	0	64	1	2	0	0	0	0	1	#NULL!	#NULL!	0	29.06	5.7	5.8	6.9	6.7	6.8	113.333	202	87	61	113	75.2287	32	2	1	0	0	3	0	0	1	0	0						0	1	20.2	8.7	11.3	7.52287	3.2
1161	1	64	0	1	1	0	0	1	1	1	1	0	37.31	7.2	8	7.9	7.9	7.7	76	125	113	29	74	85.3864	28	1	1	1	0	3	0	0	0	0	0						1	2	12.5	11.3	7.4	8.53864	2.8
1162	0	48	1	2	1	0	0	0	1	1	1	0	25.91	5.4	6	5.7	6.2	6.1	111	170	178	41	100	58.6729	89	0	1	0	0	2	0	0	0	0	0						0	1	17	17.8	10	5.86729	8.9
1163	0	58	1	1	0	0	0	1	1	1	0	1	22.87	6.4	6.7	6.9	6.9	7	96	228	211	48	137	91.3379	17	2	0	1	0	4	0	0	0	0	0						0	2	22.8	21.1	13.7	9.13379	1.7
1164	0	51	0	3	1	0	0	1	1	1	1	0	27.66	6.6	6.4	6.5	6.5	6.6	86	243	207	42	160	133.679	16	0	0	1	0	1	0	0	0	0	0						0	2	24.3	20.7	16	13.3679	1.6
1165	0	64	0	1	0	0	0	0	1	1	1	0	25	4.9	5.8	5.8	5.8	5.9	95.6667	201	75	66	114	91.0368	30	0	1	0	0	2	0	0	0	0	0						0	1	20.1	7.5	11.4	9.10368	3
1166	0	32	1	3	1	1	0	0	1	1	1	0	31.26	6.7	6.6	6.3	6	6.4	93	167	125	35	113	104.458	30	0	1	0	0	1	0	0	0	0	0						0	2	16.7	12.5	11.3	10.4458	3
1167	1	49	1	1	0	0	0	0	1	0	1	0	28.11	7.7	7.3	7.3	10	11.2	109	135	57	65	57	79.0947	150	2	1	0	0	2	0	0	0	0	0						1	1	13.5	5.7	5.7	7.90947	15
1168	0	61	1	2	1	0	0	2	1	1	1	0	25.72	7.2	5	5.4	5.5	5.8	60	174	161	37	114	78.0187	19	0	1	1	0	2	1	1	0	0	0						0	2	17.4	16.1	11.4	7.80187	1.9
1169	1	56	0	1	0	0	0	2	1	0	0	0	22.96	7.2	7.5	7.5	7.7	7.6	107	209	96	71	121	64.7685	13	0	0	0	0	3	0	0	0	0	0						1	1	20.9	9.6	12.1	6.47685	1.3
1170	0	64	1	2	1	0	0	0	1	1	0	0	27.08	6.6	6.6	5.9	5.8	5.8	125.333	177	236	63	73	84.9547	17	0	1	1	1	1	0	0	0	0	0						0	1	17.7	23.6	7.3	8.49547	1.7
1171	0	43	1	3	1	0	0	1	1	1	1	1	27.36	7.1	5.7	5.9	5.7	5.7	100.333	173	153	35	114	73.8336	27	0	1	1	0	3	1	0	0	0	0						0	2	17.3	15.3	11.4	7.38336	2.7
1172	1	56	0	0	0	0	0	#NULL!	0	#NULL!	#NULL!	0	24.46	5.9	7.2	7.1	7.2	7.1	108.333	150	46	61	74	86.5599	32	0	1	0	0	1	0	0	0	0	0						1	1	15	4.6	7.4	8.65599	3.2
1173	1	64	1	1	0	0	0	0	1	0	1	0	25.54	7.1	7.8	7.9	8.1	7.2	95	202	39	64	126	84.9547	13	0	1	0	0	1	1	1	1	0	0						1	1	20.2	3.9	12.6	8.49547	1.3
1174	0	58	1	1	1	0	0	0	1	0	1	0	26.29	7.3	7.2	7	6.5	6.8	98	223	94	49	135	68.7535	20	2	0	1	0	2	0	0	0	0	0						0	1	22.3	9.4	13.5	6.87535	2
1175	0	59	1	1	0	0	0	2	1	0	1	1	29.83	7	7	5.3	5.9	6.2	93.6667	120	133	29	62	49.4188	48	1	1	0	0	2	0	0	1	0	0						0	2	12	13.3	6.2	4.94188	4.8
1176	0	53	1	2	1	0	0	2	1	0	1	0	24.22	5.6	6.2	6.1	5.9	6	107	122	359	31	46	40.4435	13	0	1	0	0	2	0	0	1	0	0						0	1	12.2	35.9	4.6	4.04435	1.3
1177	0	39	1	2	1	0	0	1	1	0	1	0	31.18	6	6.3	6.3	5.9	6.1	113.667	230	187	60	141	80.2063	33	0	1	1	0	2	0	1	0	0	0						0	1	23	18.7	14.1	8.02063	3.3
1178	0	62	0	1	0	0	0	1	1	1	1	1	23.28	6.8	6.5	6.5	6.6	6.6	108.333	138	49	67	64	90.7471	36	0	0	1	0	1	0	0	0	0	0						0	2	13.8	4.9	6.4	9.07471	3.6
1179	0	59	1	2	0	0	0	2	1	1	1	1	26.51	5.4	5.5	5.4	5.4	5.5	100.667	142	65	49	82	84.2062	36	0	0	1	0	1	0	0	0	0	0						0	2	14.2	6.5	8.2	8.42062	3.6
1180	0	47	0	2	0	0	0	1	1	1	1	0	34	7.8	7.1	6.4	6.2	6	105.333	131	101	51	63	99.4659	15	0	0	1	0	1	0	0	0	0	0						0	2	13.1	10.1	6.3	9.94659	1.5
1181	0	56	0	1	1	0	0	2	1	1	1	1	22.51	6.6	6.1	6.1	6.2	6.5	92.6667	166	112	47	94	54.019	17	0	0	1	1	2	0	0	0	0	0						0	2	16.6	11.2	9.4	5.4019	1.7
1182	0	63	0	1	0	0	0	1	1	1	1	0	30.23	6.6	5.9	5.9	5.9	5.8	90.3333	191	520	40	74	99.06	127	0	1	0	1	1	0	0	0	0	0						0	2	19.1	52	7.4	9.906	12.7
1183	1	41	0	2	1	0	0	0	1	0	1	0	27.04	7.6	7.4	7.4	6.7	7.2	88.3333	212	119	#NULL!	135	92.2155	33	0	0	1	0	1	0	0	0	0	0						1	1	21.2	11.9	13.5	9.22155	3.3
1184	1	62	0	1	1	0	0	0	1	1	1	1	26.11	6.8	7	7.2	7.1	7.3	94.3333	137	158	32	82	67.55	23	0	1	1	0	1	0	0	0	0	0						1	1	13.7	15.8	8.2	6.755	2.3
1185	0	50	0	2	0	0	0	2	1	1	1	0	19.87	6.7	7.4	7.4	7.8	6.7	89.6667	145	95	55	69	192.227	17	0	0	1	0	1	0	0	0	0	0						0	2	14.5	9.5	6.9	19.2227	1.7
1186	0	46	0	2	0	0	0	0	1	1	1	0	22.23	5.8	5.9	5.7	5.8	5.8	76.3333	205	71	52	127	113.691	26	0	1	1	0	4	0	1	0	0	0						0	2	20.5	7.1	12.7	11.3691	2.6
1187	0	53	0	2	0	0	0	2	1	1	1	1	20.84	7.1	6.3	6.5	6	6.5	103.667	231	248	43	146	108.22	32	0	0	1	0	1	0	0	0	0	0						0	1	23.1	24.8	14.6	10.822	3.2
1188	0	61	1	1	0	1	0	2	1	1	1	1	28.55	7.2	6.4	6.2	5.9	6.1	83.6667	177	241	38	94	63.7967	31	0	0	0	1	4	0	0	0	0	0						0	2	17.7	24.1	9.4	6.37967	3.1
1189	0	45	0	3	1	0	0	0	1	1	1	0	22.06	7.2	9.5	9.5	6.7	6.7	93.3333	173	125	49	107	77.9211	51	0	0	0	0	2	0	0	0	0	0						0	1	17.3	12.5	10.7	7.79211	5.1
1190	0	43	1	2	1	0	1	0	1	0	1	0	32.49	6.3	6	6.1	6.1	6.5	101	210	190	43	136	59.969	54	0	1	1	1	4	0	0	0	1	0						0	1	21	19	13.6	5.9969	5.4
1191	0	48	1	2	0	0	0	0	1	1	1	0	29.15	7	6.5	5.7	6	6	94	136	67	41	80	79.4197	61	0	1	1	0	1	0	0	0	0	0						0	2	13.6	6.7	8	7.94197	6.1
1192	1	49	0	2	1	0	0	2	1	0	1	1	24.62	6.8	6.6	6.7	7.1	7.1	74.6667	234	81	61	167	52.5756	15	0	0	1	0	1	0	0	0	0	0						1	1	23.4	8.1	16.7	5.25756	1.5
1193	0	55	0	2	0	0	0	0	0	1	1	0	24.03	6.8	6.5	6.3	6.3	6.2	91.6667	210	109	61	133	172.298	26	0	0	1	0	1	0	0	0	0	0						0	2	21	10.9	13.3	17.2298	2.6
1194	0	62	0	0	0	0	0	1	1	1	1	0	26.74	6.7	5.6	5.6	5.6	5.9	83	154	88	41	81	84.7897	25	0	1	0	0	2	0	0	0	0	0						0	1	15.4	8.8	8.1	8.47897	2.5
1195	1	47	0	1	1	0	0	0	1	#NULL!	#NULL!	0	32.89	7.5	9.1	9.1	8	8	100.333	182	157	50	108	106.7	30	0	1	0	0	4	0	0	0	0	0						1	1	18.2	15.7	10.8	10.67	3
1196	0	42	1	2	1	0	0	0	1	1	1	0	28.26	7.6	6.3	6.3	6.2	6.2	100.333	323	305	64	194	88.095	38	0	1	0	1	1	0	0	0	0	0						0	1	32.3	30.5	19.4	8.8095	3.8
1197	0	63	1	1	0	0	0	0	1	0	1	0	24.91	7.8	6.3	5.2	5.1	5.1	105.333	259	153	73	155	85.2268	123	0	1	1	0	2	0	0	1	0	0						0	1	25.9	15.3	15.5	8.52268	12.3
1198	1	57	0	2	1	0	0	1	1	1	1	0	27	7.2	8.3	7.9	6.6	8	98.6667	201	122	38	134	105.438	64	0	0	1	0	2	0	0	0	0	0						1	2	20.1	12.2	13.4	10.5438	6.4
1199	0	63	1	1	0	0	0	1	1	1	1	0	25.65	7.7	6.5	6.1	6	5.8	92	152	85	33	100	83.8783	51	0	0	0	0	2	0	0	0	0	0						0	2	15.2	8.5	10	8.38783	5.1
1200	0	57	1	2	0	0	0	0	1	1	1	0	24.49	6.6	6	6	5.9	5.6	94	138	82	37	88	68.2799	41	0	1	0	0	3	0	0	0	0	0						0	1	13.8	8.2	8.8	6.82799	4.1
1201	0	50	1	1	1	0	1	0	1	0	1	0	24.87	5.8	5.6	13.7	13.7	6.6	117.667	209	73	94	69	63.8302	31	2	1	0	0	1	0	0	0	1	0						0	1	20.9	7.3	6.9	6.38302	3.1
1202	0	59	0	1	1	0	0	0	1	1	1	0	27.31	6.7	6.5	6.6	6.1	6	96.6667	183	128	47	114	104.327	15	0	1	0	0	3	0	0	0	0	0						0	2	18.3	12.8	11.4	10.4327	1.5
1203	0	35	0	2	1	0	0	0	1	1	1	0	38.86	7.8	6.4	6.4	5.7	6	95.3333	211	290	33	129	81.6263	84	0	0	1	1	2	0	0	0	0	0						0	1	21.1	29	12.9	8.16263	8.4
1204	0	40	0	2	1	0	0	0	0	1	1	0	22.32	6.5	6.7	6.9	6.3	6.5	96.3333	174	315	46	95	150.661	22	0	0	0	0	1	0	0	0	0	0						0	1	17.4	31.5	9.5	15.0661	2.2
1205	1	54	0	2	1	0	0	2	1	1	0	0	29.55	7	7	6.4	6.3	7.3	84.3333	257	137	58	177	92.07	71	0	1	1	0	2	1	0	0	0	0						1	2	25.7	13.7	17.7	9.207	7.1
1206	0	53	0	2	1	0	0	1	1	1	1	1	26	6.5	6.7	6.9	6.6	6.6	80	235	178	61	139	90.51	27	0	1	1	1	1	0	0	0	0	0						0	2	23.5	17.8	13.9	9.051	2.7
1207	0	58	0	1	0	0	0	1	1	1	1	0	42.5	5.7	5.4	5.4	5.4	5.6	103	185	98	57	113	113.52	16	0	1	0	0	1	0	0	0	0	0						0	2	18.5	9.8	11.3	11.352	1.6
1208	0	56	0	2	0	0	0	0	1	0	1	0	34.55	6.9	6.8	6.9	6.5	6.3	102.667	180	102	61	102	74.1983	57	0	1	1	0	2	0	0	0	0	0						0	1	18	10.2	10.2	7.41983	5.7
1209	0	57	0	1	1	0	0	1	1	1	1	0	35.22	7	6.8	6.3	6.8	6.8	102.667	234	122	67	146	103.669	43	0	0	1	0	1	0	0	0	0	0						0	2	23.4	12.2	14.6	10.3669	4.3
1210	1	49	0	1	0	0	0	#NULL!	0	#NULL!	#NULL!	0	25.39	7.8	9.7	9.9	9.4	9.4	117.333	203	168	62	97	75.9251	102	2	1	0	0	4	0	0	0	0	0						1	1	20.3	16.8	9.7	7.59251	10.2
1211	0	52	0	1	0	0	0	0	1	0	1	0	26.61	5.6	5.4	5.8	5.7	5.5	97.6667	149	162	63	76	58.2228	23	0	0	1	0	1	0	0	0	0	0						0	1	14.9	16.2	7.6	5.82228	2.3
1212	0	39	0	3	1	0	0	0	1	1	1	0	28.17	6.2	6	5.8	6.2	5.7	75.3333	181	81	62	102	119.899	26	2	0	1	0	2	0	0	0	0	0						0	2	18.1	8.1	10.2	11.9899	2.6
1213	0	57	1	2	0	0	0	2	1	0	1	0	25.85	6.9	6	6	5.8	5.8	109.333	216	90	71	131	82.8597	18	0	1	0	0	1	0	1	0	0	0						0	1	21.6	9	13.1	8.28597	1.8
1214	0	48	1	2	0	0	0	2	1	#NULL!	#NULL!	1	29.4	7	5.6	4.5	3.9	4.2	82	125	60	46	55	74.5664	17	0	1	0	0	1	0	0	0	0	0						0	2	12.5	6	5.5	7.45664	1.7
1215	0	45	1	2	1	0	0	0	1	1	1	1	38.73	7.5	5.9	5.9	5.9	6	94.3333	164	115	41	101	104.537	41	0	1	1	0	2	1	0	0	0	0						0	2	16.4	11.5	10.1	10.4537	4.1
1216	1	61	1	2	0	1	0	2	1	0	1	0	25.65	7.9	8.9	8.9	8.9	9.1	115	239	168	43	166	85.7868	14	0	1	1	0	1	0	0	0	0	0						1	1	23.9	16.8	16.6	8.57868	1.4
1217	0	62	1	1	0	0	0	0	1	1	1	0	27.81	7.1	5.9	11.3	5.7	5.7	112.333	157	65	42	99	124.47	50	0	1	0	0	2	0	0	0	0	0						0	2	15.7	6.5	9.9	12.447	5
1218	0	53	0	1	1	0	0	0	1	0	1	1	25.74	7.4	6.6	6	6.2	6.5	83	154	86	72	76	75.0323	31	0	0	0	0	2	0	0	0	0	0						0	1	15.4	8.6	7.6	7.50323	3.1
1219	1	49	1	1	1	1	1	0	1	0	0	0	28.73	7.6	6.6	6.6	6.8	7.8	104.667	306	1356	12	115	58.4328	20	1	0	0	1	3	0	0	0	0	0						1	1	30.6	135.6	11.5	5.84328	2
1220	0	45	0	2	1	0	0	0	1	0	0	0	38.21	6.8	7.4	7.4	8.1	6.2	108.667	250	75	89	125	111.85	17	0	1	1	0	1	0	0	0	0	0						0	1	25	7.5	12.5	11.185	1.7
1221	0	43	1	3	1	0	0	1	1	1	1	1	22.93	7.6	5.2	5.1	5.2	5.3	86.6667	142	66	45	82	177.497	20	0	0	0	0	1	0	0	0	0	0						0	2	14.2	6.6	8.2	17.7497	2
1222	0	63	1	2	1	0	0	0	0	0	1	0	28.08	6.9	7.1	6.2	6.6	6.3	106.667	208	235	36	138	55.7547	34	0	1	1	0	1	0	0	0	0	0						0	1	20.8	23.5	13.8	5.57547	3.4
1223	1	52	0	2	0	0	0	1	1	1	1	0	23.22	7.8	8.1	7	7	8.1	79.6667	244	112	59	168	126.612	42	0	0	1	0	3	0	0	0	0	0						1	1	24.4	11.2	16.8	12.6612	4.2
1224	0	56	0	1	0	0	0	0	1	0	1	1	26.14	5.8	6.8	7.8	7.1	6.6	93.3333	239	63	80	147	68.2572	14	0	0	1	0	3	0	0	0	1	0						0	1	23.9	6.3	14.7	6.82572	1.4
1225	0	51	0	3	1	0	0	0	1	1	1	0	25.78	5.3	5.9	5.7	5.6	5.4	103.333	164	73	40	108	167.658	12	0	1	1	0	2	0	0	0	0	0						0	2	16.4	7.3	10.8	16.7658	1.2
1226	1	49	0	1	0	1	1	0	1	0	0	0	26.78	6.9	6.9	6.5	7.3	7.5	81.3333	187	168	57	104	76.2371	12	0	0	0	0	1	0	0	0	0	0						1	1	18.7	16.8	10.4	7.62371	1.2
1227	0	40	1	2	1	0	1	0	1	1	1	1	25.79	7.4	5.7	5.7	6.1	6.4	90.6667	181	379	48	86	110.24	25	0	1	0	1	1	0	0	0	0	0						0	2	18.1	37.9	8.6	11.024	2.5
1228	0	50	0	2	1	0	0	0	1	1	1	0	28.94	6.4	6.1	5.8	5.8	6.3	95.6667	167	379	41	71	119.5	18	0	0	0	0	2	0	0	0	0	0						0	2	16.7	37.9	7.1	11.95	1.8
1229	0	47	1	3	0	1	0	0	1	0	0	0	27.31	5.6	5.8	5.9	6	5.6	117.333	191	197	36	125	63.8907	28	0	1	0	1	1	0	0	0	0	0						0	1	19.1	19.7	12.5	6.38907	2.8
1230	0	52	0	2	1	0	0	2	1	#NULL!	#NULL!	1	23.63	7.5	6	5.4	5.6	5.9	109.333	189	149	43	116	163.58	47	0	1	1	0	1	1	0	0	0	0						0	2	18.9	14.9	11.6	16.358	4.7
1231	1	55	0	1	0	0	0	0	1	1	1	0	29.94	6.9	6.2	6.5	7.1	8.9	108	164	334	24	94	57.3535	36	0	1	0	1	1	0	0	0	0	0						1	1	16.4	33.4	9.4	5.73535	3.6
1232	0	45	1	3	1	0	0	2	1	1	0	1	21.93	6.1	6.4	6.1	6.1	6.8	80	179	67	39	116	101.148	42	0	0	1	0	2	0	0	0	0	0						0	2	17.9	6.7	11.6	10.1148	4.2
1233	1	37	1	3	0	1	0	0	1	1	1	0	24.31	7.4	7.5	7.1	7.7	8.1	98.3333	206	328	36	116	84.0801	18	0	0	0	1	1	0	0	0	0	0						1	1	20.6	32.8	11.6	8.40801	1.8
1234	1	55	0	1	1	0	0	0	1	0	1	0	28.62	6.9	7.3	6.7	7	7.6	110	157	139	46	85	74.4702	42	0	1	0	0	2	0	0	0	0	0						1	1	15.7	13.9	8.5	7.44702	4.2
1235	1	53	0	1	0	0	0	2	1	1	1	0	26.19	7.2	7.3	6.8	7.1	7.2	96.6667	167	109	59	90	97.0694	62	0	1	1	0	2	0	0	0	0	0						1	2	16.7	10.9	9	9.70694	6.2
1236	0	52	1	3	0	0	0	2	1	1	0	1	17.65	7	5.5	6.3	5.8	6	93.6667	192	100	42	127	73.36	10	2	1	1	1	3	1	0	1	0	0						0	2	19.2	10	12.7	7.336	1
1237	0	45	1	2	1	1	0	0	1	1	1	0	22.72	5.9	5.7	6.3	6.4	6.2	88	131	500	38	14	70.5882	88	0	0	0	1	1	0	0	0	0	0						0	1	13.1	50	1.4	7.05882	8.8
1238	0	44	0	2	0	0	0	1	1	1	1	0	25.77	7.3	8.3	6.8	6.3	6.3	96	157	161	41	99	74.6801	95	0	0	1	0	2	0	1	0	0	0						0	1	15.7	16.1	9.9	7.46801	9.5
1239	0	57	1	1	0	1	0	1	1	1	1	0	24.56	7	7.1	7.1	7.5	6.7	93.6667	212	179	48	144	82.8597	27	0	0	1	0	1	0	0	0	0	0						0	1	21.2	17.9	14.4	8.28597	2.7
1240	0	52	0	2	0	0	0	1	1	1	1	0	30.92	5.9	5.6	5.7	5.6	5.5	95	167	64	44	101	86.4453	12	0	0	1	0	1	0	0	0	0	0						0	2	16.7	6.4	10.1	8.64453	1.2
1241	1	47	0	1	0	0	0	0	1	0	1	0	30.13	6	8	8	7	8.4	94	178	115	39	103	89.6939	48	0	0	0	0	1	1	0	1	0	0						1	1	17.8	11.5	10.3	8.96939	4.8
1242	0	51	0	2	0	0	0	2	1	1	1	1	29.33	6.5	6.1	6	6.1	6.4	100	211	196	54	129	73.4961	21	0	1	1	1	1	0	0	0	0	0						0	2	21.1	19.6	12.9	7.34961	2.1
1243	0	49	1	2	1	1	1	0	1	0	1	0	23.44	7.3	9.6	7.3	7.9	6.3	105	225	233	56	132	96.3251	45	0	1	0	0	1	0	0	0	0	0						0	1	22.5	23.3	13.2	9.63251	4.5
1244	0	57	1	1	0	0	0	2	1	1	0	0	24.93	7	6.8	6.8	6.5	6.5	98	186	85	60	115	74.3336	37	0	1	1	0	1	0	0	0	0	0						0	1	18.6	8.5	11.5	7.43336	3.7
1245	1	58	0	0	0	0	0	0	0	0	0	0	27.53	7.1	6.9	7.2	7.3	8.1	123	165	51	60	92	123.852	26	0	1	1	0	1	0	0	0	0	0						1	1	16.5	5.1	9.2	12.3852	2.6
1246	0	43	1	2	1	0	0	0	1	1	1	1	35.22	7.1	7.1	6.9	6.6	6.6	88.3333	161	70	36	113	78.8188	41	0	1	0	0	3	0	0	0	0	0						0	2	16.1	7	11.3	7.88188	4.1
1247	0	41	0	3	1	0	0	1	1	1	1	0	23.6	6.9	6.4	6.4	6.4	6.6	108.667	180	161	49	111	92.2155	26	0	1	0	0	1	0	0	0	0	0						0	1	18	16.1	11.1	9.22155	2.6
1248	0	44	1	2	1	0	0	0	1	0	1	0	28.25	6.3	5.8	5.7	5.4	5.1	97.6667	207	58	74	140	65.7721	12	0	1	0	0	2	0	0	0	0	0						0	1	20.7	5.8	14	6.57721	1.2
1249	1	61	0	1	0	0	0	0	1	0	1	0	25.93	6.1	6.4	6.9	6.9	7.6	109.333	196	102	85	83	72.681	22	0	1	1	0	1	0	0	0	0	0						1	1	19.6	10.2	8.3	7.2681	2.2
1250	1	43	0	1	1	0	0	0	1	0	1	0	32.84	6.9	7.1	6.3	6.4	7.1	94.3333	188	84	77	104	68.3364	23	0	0	0	0	1	0	0	0	0	0						1	1	18.8	8.4	10.4	6.83364	2.3
1251	1	64	1	0	0	0	0	0	1	1	0	0	27.02	7.2	6.3	6.9	6.9	7.3	84	239	216	37	162	55.4021	24	0	1	1	0	2	1	1	1	0	0						1	1	23.9	21.6	16.2	5.54021	2.4
1252	1	61	0	1	0	0	0	0	1	1	1	0	21.93	6.1	7.4	6.7	6.7	7.3	98	246	74	67	162	89.48	16	0	0	1	0	2	0	0	0	0	0						1	2	24.6	7.4	16.2	8.948	1.6
1253	0	50	1	1	0	1	1	0	1	0	0	0	24.91	7	6.4	6.2	7.3	6.2	83.3333	207	155	52	119	78.7773	24	0	0	1	1	1	0	0	0	0	0						0	1	20.7	15.5	11.9	7.87773	2.4
1254	0	44	1	3	0	1	0	1	1	1	1	0	31	6.1	5.3	5.2	5.5	6	105.667	155	69	54	88	76.7299	23	0	1	1	0	1	0	0	0	0	0						0	2	15.5	6.9	8.8	7.67299	2.3
1255	0	63	0	1	0	0	0	0	1	0	0	0	24.65	7.7	6.7	6.2	6.2	6.1	117.667	189	92	48	125	72.4453	18	0	1	1	0	2	0	0	0	0	0						0	1	18.9	9.2	12.5	7.24453	1.8
1256	0	52	1	1	1	0	0	0	1	0	1	0	30.85	5.9	5.4	5.5	5.5	6.1	93	237	240	29	161	57.9694	30	0	1	0	1	1	0	1	0	0	0						0	1	23.7	24	16.1	5.79694	3
1257	0	63	1	1	0	1	0	2	1	1	1	0	21.32	5.2	5.9	5.5	5.8	6	81	107	59	33	59	55.5767	52	0	0	0	0	3	0	0	0	0	0						0	1	10.7	5.9	5.9	5.55767	5.2
1258	1	63	1	1	0	0	0	2	1	0	0	0	25.44	6.8	7.9	10.4	11.3	8.6	100	179	50	46	112	67.3932	46	2	0	0	0	1	0	0	0	0	0						1	1	17.9	5	11.2	6.73932	4.6
1259	0	46	0	1	0	0	0	0	1	0	0	0	23.82	5.9	5.5	5.6	5.8	5.9	87	201	194	48	111	132.828	14	2	1	0	0	2	0	0	1	0	0						0	1	20.1	19.4	11.1	13.2828	1.4
1260	0	53	0	3	1	0	0	2	1	1	1	0	31.25	7.5	7.1	7.1	6.7	6.2	99.3333	111	56	32	61	138.616	34	0	1	0	0	3	0	0	0	0	0						0	2	11.1	5.6	6.1	13.8616	3.4
1261	0	53	0	1	1	0	0	1	1	0	1	0	21.93	6.6	6.7	6.6	7	6.7	128.667	239	161	54	152	108.22	20	0	1	1	0	1	0	0	0	0	0						0	1	23.9	16.1	15.2	10.822	2
1262	0	51	1	1	0	1	0	2	1	0	1	0	27.01	6.3	6.3	5.2	5	5	101	246	743	32	113	68.8424	90	0	0	1	1	2	0	0	0	0	0						0	1	24.6	74.3	11.3	6.88424	9
1263	0	56	1	1	1	0	1	0	1	0	1	0	26.9	6.7	6.4	6.8	6.8	6.4	102.667	118	66	53	52	62.4051	68	0	0	0	0	2	0	0	0	0	0						0	1	11.8	6.6	5.2	6.24051	6.8
1264	0	49	1	2	0	0	0	0	1	1	0	0	20.2	6.2	6.5	6.4	6.1	6.5	98.6667	243	57	91	131	102.325	19	0	0	0	0	3	0	0	0	0	0						0	2	24.3	5.7	13.1	10.2325	1.9
1265	0	33	1	2	1	1	0	0	1	1	1	0	24.59	5.6	5.7	5.8	6.3	6.4	99.3333	225	136	47	138	86.0557	22	0	0	1	0	1	0	0	0	0	0						0	1	22.5	13.6	13.8	8.60557	2.2
1266	1	60	1	2	0	0	0	0	1	0	1	0	29.87	7.7	6.9	7.1	7.5	7.1	109	181	204	33	112	125.306	19	0	0	0	1	1	0	0	0	0	0						1	2	18.1	20.4	11.2	12.5306	1.9
1267	0	43	1	1	1	1	0	0	1	1	0	0	26.17	7.3	6.6	6.2	6.4	6.4	93.6667	232	178	48	161	78.6518	16	0	0	0	1	1	0	0	0	0	0						0	1	23.2	17.8	16.1	7.86518	1.6
1268	0	51	0	2	0	0	0	0	1	1	1	1	35.93	6.3	6.4	5.9	5.7	7	97.6667	170	121	42	110	119.02	41	0	1	1	0	4	0	0	0	0	0						0	2	17	12.1	11	11.902	4.1
1269	0	53	1	2	0	0	0	2	1	1	1	0	27.26	7	6.2	6.1	6.6	6.2	84.6667	119	63	41	66	87.15	46	0	0	1	0	3	1	1	0	0	0						0	2	11.9	6.3	6.6	8.715	4.6
1270	1	52	0	2	1	0	0	0	1	#NULL!	#NULL!	0	29.29	6.8	6.8	6.5	7	7.1	108.333	221	71	86	117	108.636	19	0	1	1	0	1	0	0	0	0	0						1	1	22.1	7.1	11.7	10.8636	1.9
1271	0	44	1	3	1	0	0	0	1	1	1	1	25.34	5.9	5.8	5.7	5.7	5.8	85	205	115	49	129	69.4653	26	0	0	1	0	1	0	0	0	0	0						0	2	20.5	11.5	12.9	6.94653	2.6
1272	0	60	1	2	1	0	0	1	1	#NULL!	#NULL!	1	24.97	7	5.7	5.7	5.9	5.5	100	173	202	33	100	83.9194	26	0	0	1	0	2	1	0	0	0	0						0	2	17.3	20.2	10	8.39194	2.6
1273	0	40	1	1	0	0	0	0	1	0	1	0	20.54	7.5	7.9	7.8	7.6	6.7	90.3333	201	58	57	121	133.755	18	0	0	0	0	1	0	0	0	0	0						0	1	20.1	5.8	12.1	13.3755	1.8
1274	0	41	1	3	1	0	0	1	1	1	1	0	27.94	7	6.2	6.1	6.5	6.2	103.333	216	111	39	155	105.161	81	0	0	1	0	2	0	0	0	0	0						0	2	21.6	11.1	15.5	10.5161	8.1
1275	0	63	1	1	0	1	0	0	1	#NULL!	#NULL!	0	32.6	5.9	6.4	6.4	6.1	6.2	126	256	193	42	155	75.2287	29	0	1	1	0	3	0	0	0	0	0						0	1	25.6	19.3	15.5	7.52287	2.9
1276	0	55	0	1	1	0	0	0	0	#NULL!	#NULL!	0	17.13	6.4	6	5.9	6.1	6.3	118.667	223	35	108	103	86.8771	18	0	1	0	0	1	1	0	0	0	0						0	1	22.3	3.5	10.3	8.68771	1.8
1277	0	45	0	2	0	0	0	1	1	0	1	1	28.44	7	6.6	7.4	6.4	6.4	103	191	106	59	120	130.361	29	0	0	1	0	1	0	0	0	0	0						0	1	19.1	10.6	12	13.0361	2.9
1278	0	51	0	3	1	0	0	0	1	#NULL!	#NULL!	0	26.6	6.7	6.9	7.1	7.1	7	93	134	91	39	80	81.4675	31	0	1	1	0	3	1	1	0	0	0						0	1	13.4	9.1	8	8.14675	3.1
1279	0	60	0	0	0	0	0	0	1	0	0	0	23.93	7.8	6	6	6.3	6.5	108	144	90	54	73	81.7538	32	0	1	0	0	1	0	0	0	0	0						0	1	14.4	9	7.3	8.17538	3.2
1280	0	52	1	0	0	1	1	0	1	0	1	0	20.99	7.6	7.7	7.8	8	7	111	162	77	41	105.6	88.6122	27	0	1	0	0	3	0	0	0	0	0						0	1	16.2	7.7	10.56	8.86122	2.7
1281	0	64	0	2	1	0	0	2	1	1	1	0	24.45	5.9	5.9	5.9	6	6	89.3333	227	147	57	150	74.355	23	0	1	1	1	2	0	0	0	0	0						0	2	22.7	14.7	15	7.4355	2.3
1282	0	44	0	1	0	0	0	0	1	#NULL!	#NULL!	0	19.84	6.3	6.1	6.3	6.3	6.5	107.667	161	88	75	80	77.9211	11	0	1	0	0	2	0	0	0	0	0						0	1	16.1	8.8	8	7.79211	1.1
1283	0	51	1	3	1	0	0	0	1	1	1	0	23.88	6.3	5.6	5.8	6	5.8	97.3333	189	165	42	107	58.1984	31	0	0	0	0	1	0	0	0	0	0						0	1	18.9	16.5	10.7	5.81984	3.1
1284	0	58	1	1	0	1	0	2	1	1	0	1	25.34	6.6	6.6	6.7	6.5	6.4	83.3333	322	1993	27	57	76.4813	67	0	1	1	1	4	1	0	1	0	0						0	2	32.2	199.3	5.7	7.64813	6.7
1285	0	35	1	3	0	0	0	0	1	1	1	0	30.1	6.5	7.3	7.7	8.2	6.9	103.667	190	182	38	109	95.4801	129	0	1	0	1	1	1	0	0	0	0						0	1	19	18.2	10.9	9.54801	12.9
1286	0	44	0	3	0	0	0	0	1	1	1	0	25.34	6	5.7	5.7	6.1	6.1	121.333	190	142	38	124	137.836	36	0	0	1	0	1	0	0	0	0	0						0	2	19	14.2	12.4	13.7836	3.6
1287	0	50	0	1	1	0	0	0	1	1	1	0	28.51	6.2	6.2	6	6	6.1	105.667	173	106	62	102	88.219	24	0	1	1	0	4	0	1	0	0	0						0	1	17.3	10.6	10.2	8.8219	2.4
1288	0	61	0	0	0	0	0	0	1	0	1	0	26.58	7.1	9.1	7	7	6.6	99	199	117	46	112	56.1806	41	0	1	1	0	2	0	0	1	0	0						0	1	19.9	11.7	11.2	5.61806	4.1
1289	1	62	0	1	0	0	0	0	1	0	1	0	26.66	7.6	7.9	8.1	8.2	7.5	103.667	187	174	54	106	84.7897	101	0	0	0	0	1	0	0	0	0	0						1	1	18.7	17.4	10.6	8.47897	10.1
1290	1	58	1	1	0	0	0	1	1	1	1	1	29.94	7.3	7.4	8.4	8.1	9.8	117	152	74	45	88	65.3156	59	2	1	1	0	2	0	0	0	0	0						1	2	15.2	7.4	8.8	6.53156	5.9
1291	1	61	0	2	1	0	0	1	1	0	1	0	25.29	7.4	7.1	7.5	7.4	7.2	98.6667	189	64	63	100	99.7124	19	0	1	1	0	1	0	0	0	0	0						1	1	18.9	6.4	10	9.97124	1.9
1292	0	61	1	2	0	0	0	0	1	0	1	0	31.78	6.8	5.9	5.9	5.8	6.4	106	272	149	47	182	47.9393	17	0	1	1	0	3	1	1	0	0	0						0	1	27.2	14.9	18.2	4.79393	1.7
1293	0	58	1	2	0	0	1	2	0	0	1	0	29.62	6.1	5.7	6.1	6.1	6.3	101.333	148	81	45	86	99.2879	33	0	1	1	0	1	0	0	0	0	0						0	1	14.8	8.1	8.6	9.92879	3.3
1294	0	54	1	2	0	0	0	1	1	1	1	0	22.75	7	5.9	5.8	5.9	5.8	94.3333	162	68	44	94	84.67	27	0	0	1	0	2	0	0	0	0	0						0	2	16.2	6.8	9.4	8.467	2.7
1295	1	59	0	1	0	0	0	0	1	#NULL!	#NULL!	0	32.02	7.8	10	10	8.3	12	108.333	187	102	61	88	32.9917	40	0	1	0	0	1	1	0	0	1	0						1	1	18.7	10.2	8.8	3.29917	4
1296	0	44	0	2	0	1	0	0	1	1	1	0	27.57	6.2	5.8	6.3	6.1	5.8	85.3333	157	85	45	97	83.9461	21	0	1	1	0	3	0	0	0	0	0						0	2	15.7	8.5	9.7	8.39461	2.1
1297	0	43	0	2	1	0	0	0	1	1	1	1	28.26	7	6.8	7.1	7.2	6.9	85.6667	171	491	29	70	107.048	30	0	0	0	1	2	0	0	0	0	0						0	2	17.1	49.1	7	10.7048	3
1298	0	51	1	2	0	0	0	1	1	1	1	0	21.27	7.3	5.9	6	6.1	6.4	95.6667	153	94	52	89	78.7773	17	0	0	0	0	1	0	0	0	0	0						0	1	15.3	9.4	8.9	7.87773	1.7
1299	0	52	0	1	0	0	0	0	1	0	1	0	24.89	6.6	7.6	6.4	6.3	6.1	96.3333	213	182	43	135	75.4552	83	0	0	1	0	2	0	0	0	0	0						0	1	21.3	18.2	13.5	7.54552	8.3
1300	0	59	1	2	1	0	0	2	1	1	1	0	25.28	7.2	6.5	6.6	6.5	6.5	89.6667	190	93	50	127	66.42	18	0	0	1	0	2	0	0	0	0	0						0	2	19	9.3	12.7	6.642	1.8
1301	0	50	0	0	0	0	0	0	1	0	1	0	30.23	6.3	6	5.8	6	5.5	99.6667	191	113	56	117	109.499	31	0	0	0	0	1	0	0	0	0	0						0	1	19.1	11.3	11.7	10.9499	3.1
1302	0	51	1	2	0	1	0	0	1	0	1	1	33.22	7.7	6.7	6.7	7	6.7	103	162	353	32	73	72.86	23	0	1	0	1	4	0	0	0	0	0						0	2	16.2	35.3	7.3	7.286	2.3
1303	0	59	1	1	0	0	0	0	1	0	0	0	26.16	5.7	5.7	6.1	6.2	5.9	95.6667	179	130	51	102	68.5154	29	0	1	0	0	2	1	1	0	0	0						0	1	17.9	13	10.2	6.85154	2.9
1304	0	61	1	1	0	0	0	0	1	0	1	0	25.33	7.5	6.2	6.3	6.3	6.3	106.667	172	109	34	109	85.7868	15	0	1	1	1	1	1	1	0	0	0						0	1	17.2	10.9	10.9	8.57868	1.5
1305	1	36	1	2	1	0	0	0	1	0	1	0	27.34	6.7	6.2	6.7	7.2	7.2	90	130	81	45	72	94.9505	64	0	0	0	0	1	0	0	0	0	0						1	1	13	8.1	7.2	9.49505	6.4
1306	0	61	0	1	1	0	0	2	1	1	1	0	29.35	7.1	6.9	6.7	6.7	6.5	93	168	130	50	94	113.273	15	0	0	0	0	1	0	0	0	0	0						0	2	16.8	13	9.4	11.3273	1.5
1307	1	57	0	1	1	0	0	1	1	1	1	0	25.45	7	7.6	8.5	8.1	7.5	121	210	96	75	107	48.1521	24	0	1	1	0	3	0	0	0	0	0						1	2	21	9.6	10.7	4.81521	2.4
1308	0	59	1	2	1	0	0	0	1	#NULL!	#NULL!	0	25.94	6.1	6.1	5.6	5.4	5.4	107	169	57	52	112	86.0751	29	0	1	0	0	1	0	0	0	0	0						0	1	16.9	5.7	11.2	8.60751	2.9
1309	0	57	0	2	1	0	0	1	1	1	1	0	31.74	6.6	5.7	5.8	5.9	5.9	103	155	223	37	71	69.88	25	0	0	0	0	2	0	0	0	0	0						0	2	15.5	22.3	7.1	6.988	2.5
1310	0	63	1	1	0	0	0	#NULL!	0	#NULL!	#NULL!	0	28.91	7.8	7.2	6.5	6.3	6.3	101.667	153	188	54	79	75.4696	31	0	0	1	0	1	0	0	0	0	0						0	1	15.3	18.8	7.9	7.54696	3.1
1311	0	64	0	0	0	0	0	2	1	0	0	0	30.27	7.5	7.7	7.2	7	7	91.6667	211	117	67	126	63.0364	48	0	1	1	0	1	0	0	0	0	0						0	1	21.1	11.7	12.6	6.30364	4.8
1312	0	47	1	2	1	0	0	1	1	1	1	1	26.89	6.6	6.5	6.5	6.7	6.7	96.6667	172	121	43	105	103.618	34	0	1	1	0	1	0	0	0	0	0						0	2	17.2	12.1	10.5	10.3618	3.4
1313	0	56	1	1	0	0	1	0	1	1	1	0	28.47	7.9	6.7	6.3	6.9	6.8	99.6667	142	737	31	32	84.3558	14	0	0	0	1	1	0	0	0	0	0						0	2	14.2	73.7	3.2	8.43558	1.4
1314	0	42	1	3	1	0	0	0	1	0	1	0	32.29	6.4	6.4	6.8	6.8	6.3	90.3333	193	132	36	124	71.5697	51	0	0	1	0	1	0	0	0	0	0						0	1	19.3	13.2	12.4	7.15697	5.1
1315	0	32	1	3	1	0	0	0	1	1	1	0	24.93	6	5.6	5.8	5.7	5.9	98	183	190	45	108	86.595	20	0	1	1	0	2	0	0	0	0	0						0	1	18.3	19	10.8	8.6595	2
1316	0	51	0	2	1	0	0	2	1	0	0	0	24.88	7.4	5.8	5.8	5.7	5.8	90	152	106	49	87	88.219	17	0	0	0	0	1	0	0	0	0	0						0	1	15.2	10.6	8.7	8.8219	1.7
1317	1	56	0	2	1	0	0	0	1	1	1	1	24.11	7.2	6.9	7.1	6.9	7.6	78.3333	165	58	53	94	73.14	34	0	1	0	1	1	0	0	0	0	0						1	2	16.5	5.8	9.4	7.314	3.4
1318	0	57	1	2	0	0	0	1	1	1	0	1	26.27	5	5	5.4	5	5	119.667	164	105	56	83	85.874	22	2	1	1	0	2	1	0	0	0	0						0	2	16.4	10.5	8.3	8.5874	2.2
1319	0	64	0	0	0	0	0	0	1	0	1	0	24.88	5.7	5.7	5	5.7	6.3	107.333	159	780	30	36	84.245	19	0	1	0	1	1	0	0	0	0	0						0	1	15.9	78	3.6	8.4245	1.9
1320	0	64	1	2	0	1	0	2	1	1	1	0	27.71	6.7	6.3	6.1	6.3	6.5	101.333	150	127	33	83	54.13	32	0	0	1	0	3	0	1	0	0	0						0	2	15	12.7	8.3	5.413	3.2
1321	1	36	1	2	1	1	0	0	1	#NULL!	#NULL!	0	30.48	5.8	8.1	8.1	8.5	8.5	94	214	345	34	130	68.5068	48	0	0	0	1	1	0	0	0	0	0						1	1	21.4	34.5	13	6.85068	4.8
1322	0	46	0	1	0	0	0	0	1	1	1	0	27.42	6.5	6.5	6.5	6.9	7	137.667	266	148	42	204	77.5665	15	0	1	1	0	2	0	0	1	0	0						0	1	26.6	14.8	20.4	7.75665	1.5
1323	0	47	0	2	1	0	0	0	1	#NULL!	#NULL!	0	36.74	6.7	7.2	7.2	6.4	6.6	101.333	160	234	50	85	76.8848	52	0	1	1	0	2	0	0	0	0	0						0	1	16	23.4	8.5	7.68848	5.2
1324	1	44	1	2	1	1	0	0	1	0	1	0	31.75	7.4	6.8	6.7	6.9	7.5	120.333	204	268	37	114	65.7721	44	0	1	0	1	1	0	1	0	1	0						1	1	20.4	26.8	11.4	6.57721	4.4
1325	0	60	0	0	1	0	0	1	1	1	1	0	25.87	6.2	6.2	6.1	6.1	6.3	98	188	76	47	125	129.347	13	0	0	1	0	1	0	0	0	0	0						0	2	18.8	7.6	12.5	12.9347	1.3
1326	0	38	0	2	0	0	0	2	1	1	1	0	29.64	6.2	5.2	4.8	5.3	5.6	103	170	65	47	111	129.8	38	0	1	1	0	2	0	0	0	0	0						0	2	17	6.5	11.1	12.98	3.8
1327	0	57	1	2	1	0	0	2	1	0	0	0	26.29	6.8	6.7	6.6	6.6	6.6	109.667	275	137	63	182	56.899	23	0	0	1	0	1	0	1	0	0	0						0	1	27.5	13.7	18.2	5.6899	2.3
1328	0	61	1	1	0	0	0	0	1	#NULL!	#NULL!	0	22.2	5.7	6.3	6.7	6.7	6.7	114.667	220	150	43	128	51.3512	74	0	1	1	0	1	0	0	0	0	0						0	1	22	15	12.8	5.13512	7.4
1329	0	63	0	1	1	0	0	0	1	#NULL!	#NULL!	0	23.3	6.7	6.7	6.6	6.6	6.8	86.6667	167	69	52	101	72.4453	16	0	1	0	0	1	0	0	0	0	0						0	1	16.7	6.9	10.1	7.24453	1.6
1330	0	53	0	1	1	0	0	1	1	1	1	0	20.9	6.8	7.2	7	7	7	130	159	168	61	85	150.537	27	0	1	1	0	1	0	0	0	0	0						0	1	15.9	16.8	8.5	15.0537	2.7
1331	1	57	0	1	0	0	0	0	1	0	0	0	25.98	7.4	7.3	7.5	6.8	7.6	83.3333	166	156	71	83	93.1851	28	0	1	1	1	1	0	0	0	0	0						1	1	16.6	15.6	8.3	9.31851	2.8
1332	1	48	1	2	0	0	0	0	1	0	1	0	34.48	7.8	6.8	6.6	7	7.1	115.667	212	127	43	140	63.6225	43	0	1	1	0	2	0	0	0	0	0						1	1	21.2	12.7	14	6.36225	4.3
1333	1	61	0	0	0	0	0	0	1	0	1	0	30.35	7.2	7.4	8.4	7.8	8	114	232	95	66	145	72.9213	27	0	1	1	0	1	0	0	0	0	0						1	1	23.2	9.5	14.5	7.29213	2.7
1334	1	49	1	1	1	1	1	0	1	#NULL!	#NULL!	0	25.95	7.2	7.4	6.8	7.6	8.4	102.333	148	129	37	95	89.3205	38	0	1	0	0	1	0	0	0	0	0						1	1	14.8	12.9	9.5	8.93205	3.8
1335	0	58	1	2	0	0	0	0	1	1	1	0	22.87	7.1	10.3	10.3	6.4	7	104	254	689	36	91	73.9164	17	2	0	0	1	2	0	0	0	0	0						0	2	25.4	68.9	9.1	7.39164	1.7
1336	0	51	0	0	1	0	0	0	1	1	1	0	29.55	6.1	6.1	6.1	5.5	5.5	93	192	212	42	108	66.0099	32	0	0	0	0	1	0	0	0	0	0						0	1	19.2	21.2	10.8	6.60099	3.2
1337	1	48	1	2	1	1	1	0	1	0	0	0	28.94	5.4	5	7.1	9.2	9.2	107	227	415	38	124	90.0638	43	0	1	1	1	1	0	0	0	0	0						1	1	22.7	41.5	12.4	9.00638	4.3
1338	0	44	1	2	0	0	0	0	1	0	0	0	30.28	6.3	6.6	6.4	6.6	6	79.3333	247	227	35	169	91.2515	39	0	0	1	0	1	0	0	0	0	0						0	1	24.7	22.7	16.9	9.12515	3.9
1339	0	42	1	2	1	0	0	0	1	0	1	0	27.48	6.9	6.9	6.5	6.1	6.4	92.6667	155	208	47	79	81.5538	41	0	0	0	0	1	0	0	0	0	0						0	1	15.5	20.8	7.9	8.15538	4.1
1340	0	64	0	0	0	0	0	#NULL!	0	#NULL!	#NULL!	0	25.92	6.4	6.4	6.4	6.4	6.4	112.333	147	87	39	88	144.911	16	0	0	0	0	1	0	0	0	0	0						0	1	14.7	8.7	8.8	14.4911	1.6
1341	0	51	1	3	0	0	0	0	1	0	0	0	24.05	7.1	6.9	7.2	6.6	6.4	103.333	214	297	46	124	95.5541	13	0	1	1	0	1	0	0	0	0	0						0	1	21.4	29.7	12.4	9.55541	1.3
1342	1	50	1	1	1	0	0	0	1	0	0	0	25.05	6.3	7	7	9.9	9.5	90	164	84	52	85	109.757	29	0	1	0	0	1	0	0	0	0	0						1	1	16.4	8.4	8.5	10.9757	2.9
1343	0	58	1	0	0	0	0	0	1	#NULL!	#NULL!	0	28.83	6.5	5.1	5.2	5.5	5.5	105	85	65	44	20	115.829	18	0	0	0	0	4	0	0	0	0	0						0	1	8.5	6.5	2	11.5829	1.8
1344	0	46	1	1	1	0	0	0	1	0	1	0	27.99	7.1	7.7	7.7	6.7	6.6	105.667	207	287	33	116	72.0661	16	0	1	0	1	1	0	0	0	1	0						0	1	20.7	28.7	11.6	7.20661	1.6
1345	0	49	1	1	0	0	0	0	1	0	1	0	23.66	6.7	6.1	6.1	6.2	6.7	96.6667	152	180	47	82	79.0947	12	0	0	0	0	1	0	0	0	0	0						0	1	15.2	18	8.2	7.90947	1.2
1346	0	60	1	2	1	0	0	2	1	1	1	0	25.98	6.8	7.1	6.8	6.7	6.9	116	197	100	49	129	62.7573	34	0	1	0	0	1	0	0	0	0	0						0	1	19.7	10	12.9	6.27573	3.4
1347	0	55	1	2	0	0	0	0	1	1	1	0	33.22	5.5	5	5.4	5.6	5.4	95.6667	121	113	28	84	97.1885	50	0	1	1	1	3	0	0	1	0	0						0	2	12.1	11.3	8.4	9.71885	5
1348	1	54	0	2	1	0	0	2	1	1	1	1	28.34	7.8	7.8	7.9	8	8.5	83.6667	165	158	37	104	115.18	36	0	0	0	0	2	0	0	1	0	0						1	2	16.5	15.8	10.4	11.518	3.6
1349	0	54	0	1	1	0	0	0	1	0	1	0	27.16	5.4	5.1	5.7	5.7	6.1	109.333	222	247	48	144	61.3018	19	0	1	1	0	2	0	0	0	0	0						0	1	22.2	24.7	14.4	6.13018	1.9
1350	0	55	1	1	0	0	0	2	1	1	1	0	23.41	6	6	5.8	5.6	5.9	92	145	113	41	87	83.4554	29	0	0	0	0	1	0	0	0	0	0						0	1	14.5	11.3	8.7	8.34554	2.9
1351	0	63	1	1	0	0	0	2	1	0	0	0	22.68	7.3	7.3	5.2	5.5	4.8	92	174	118	38	114	67.609	58	0	0	0	0	1	0	0	0	0	0						0	1	17.4	11.8	11.4	6.7609	5.8
1352	1	53	0	2	1	0	0	2	1	1	1	0	25.96	7.3	6.6	7.3	7.5	7.5	86	186	90	56	105	126.126	11	0	0	0	0	1	0	0	0	0	0						1	1	18.6	9	10.5	12.6126	1.1
1353	0	54	0	2	1	0	0	0	1	1	1	0	23.73	6.3	6.1	6.5	6.2	6.1	79.6667	147	135	47	70	59.14	7	0	1	1	0	3	0	0	0	0	0						0	2	14.7	13.5	7	5.914	0.7
1354	0	57	1	3	1	0	0	1	1	1	1	0	24.6	6.2	6.2	6.2	6.3	6.2	91	167	53	67	82	92.2718	28	0	1	0	0	1	0	0	0	0	0						0	2	16.7	5.3	8.2	9.22718	2.8
1355	1	49	1	2	1	0	0	1	1	0	1	0	26.91	7.4	6.3	7.8	7.8	7.8	93.3333	178	148	40	117	86.3965	36	0	1	0	1	1	0	0	0	0	0						1	2	17.8	14.8	11.7	8.63965	3.6
1356	0	42	1	3	0	1	0	0	1	1	0	0	25.78	6	5.6	5.5	5.3	5.4	78.6667	201	117	50	129	73.0595	38	0	0	1	0	2	0	0	0	0	0						0	1	20.1	11.7	12.9	7.30595	3.8
1357	0	49	1	1	1	1	0	1	1	1	1	1	26.19	7.3	7.2	6.6	6.6	6.8	87.3333	199	502	29	99	76.6199	29	0	0	0	1	2	0	0	0	0	0						0	1	19.9	50.2	9.9	7.66199	2.9
1358	0	54	1	2	0	0	0	0	1	0	1	0	30.18	5.8	7	7.2	6.9	6.9	151	145	148	55	72	36.9882	26	0	1	1	0	3	0	0	0	1	0						0	1	14.5	14.8	7.2	3.69882	2.6
1359	1	56	0	0	0	0	0	0	1	0	1	1	25.27	7.2	6.2	6.9	7	7.4	105.667	176	82	64	106	124.732	9	1	0	0	0	1	0	0	0	0	0						1	1	17.6	8.2	10.6	12.4732	0.9
1360	0	52	1	1	1	1	1	2	1	1	1	0	26.21	7.6	7.6	7.2	7.1	7	119.667	159	98	60	82	88.6122	42	0	1	0	0	1	0	0	0	0	0						0	1	15.9	9.8	8.2	8.86122	4.2
1361	0	44	0	2	0	0	0	0	1	1	1	0	25.81	6.9	6.1	6	6.3	6.3	96.3333	200	296	70	86	90.9029	12	0	0	0	0	1	0	0	0	0	0						0	1	20	29.6	8.6	9.09029	1.2
1362	0	59	1	2	1	1	0	2	1	0	1	0	18.88	6.2	6.2	6.4	6.5	6.6	76.6667	174	54	83	80	68.5154	17	0	0	0	0	1	0	0	0	0	0						0	1	17.4	5.4	8	6.85154	1.7
1363	0	59	1	1	1	0	0	1	1	0	1	0	25.18	6.7	5.9	6.1	6.2	6.2	76	166	97	47	92	76.4813	84	0	0	0	0	1	0	0	0	0	0						0	1	16.6	9.7	9.2	7.64813	8.4
1364	0	56	1	2	0	1	0	2	1	1	1	0	22.51	5.8	6.2	6.1	5.7	6	87.6667	152	111	35	94	62.6298	16	0	1	1	0	4	0	0	0	0	0						0	2	15.2	11.1	9.4	6.26298	1.6
1365	0	50	0	2	1	0	0	2	1	1	1	1	29.72	6.5	6.4	7	6.7	6.9	100.333	142	148	33	82	94.4173	31	0	1	0	0	2	0	0	0	0	0						0	2	14.2	14.8	8.2	9.44173	3.1
1366	0	37	1	3	1	0	0	0	0	1	1	0	34.19	5.9	6.2	6.1	6.4	6.5	90	219	136	49	136	96.18	34	0	0	1	0	2	1	0	0	0	0						0	2	21.9	13.6	13.6	9.618	3.4
1367	0	39	1	2	1	1	0	1	1	1	1	1	23.86	7.6	5.4	5.4	5.5	5.8	68.6667	202	228	32	146	106.224	29	0	0	1	1	1	0	0	0	0	0						0	1	20.2	22.8	14.6	10.6224	2.9
1368	0	53	1	2	0	1	0	0	1	1	1	1	24.68	7.7	6.5	6.8	7.4	7	89	217	227	50	119	69.2959	16	0	1	1	0	2	0	0	0	0	0						0	2	21.7	22.7	11.9	6.92959	1.6
1369	0	58	1	3	0	0	0	2	1	1	1	1	27	7.5	6.2	6	6.2	5.8	95.6667	139	143	35	69	74.75	31	0	1	1	0	1	0	0	0	0	0						0	1	13.9	14.3	6.9	7.475	3.1
1370	0	41	1	2	1	0	0	0	1	1	1	0	31.14	6.5	5.8	6	6.2	6.8	105.333	154	236	30	79	112.476	32	0	0	0	0	4	0	0	0	0	0						0	2	15.4	23.6	7.9	11.2476	3.2
1371	0	51	0	3	0	0	0	2	1	1	1	1	21.88	6	6.2	5.9	6.4	5.8	87.6667	196	74	84	65	109.169	21	0	1	0	0	2	0	0	0	0	0						0	2	19.6	7.4	6.5	10.9169	2.1
1372	1	56	0	1	1	0	0	0	1	1	0	1	29.35	7.6	7.1	7.6	7.3	7.5	110.333	182	184	43	103	80.8921	32	0	1	0	1	1	0	0	0	0	0						1	2	18.2	18.4	10.3	8.08921	3.2
1373	0	58	1	2	0	0	0	0	1	1	1	1	27.98	7	6	5.9	5.9	6.2	82.6667	206	103	62	121	85.57	21	1	0	1	0	1	0	0	0	0	0						0	2	20.6	10.3	12.1	8.557	2.1
1374	0	41	0	2	1	0	0	2	1	1	1	1	23.26	7.1	6.4	6.4	6.9	6.7	93.6667	219	176	45	140	112.327	22	0	0	1	0	2	0	0	0	0	0						0	2	21.9	17.6	14	11.2327	2.2
1375	0	49	1	2	1	0	0	0	1	1	0	0	30.86	7.3	7.4	6.9	7.3	6.5	91	291	522	40	179	126.078	32	0	1	1	1	3	0	1	0	0	0						0	2	29.1	52.2	17.9	12.6078	3.2
1376	1	48	1	2	1	1	0	0	1	0	1	0	32.4	6.9	7	7	7	10.9	97.6667	177	164	42	97	124.46	78	0	0	0	0	1	0	0	0	0	0						1	2	17.7	16.4	9.7	12.446	7.8
1377	1	45	0	2	1	0	0	0	1	1	1	0	31.4	7.4	7.6	7.6	8.7	8.1	92.6667	170	292	39	86	104.093	52	0	0	0	1	3	0	0	0	0	0						1	2	17	29.2	8.6	10.4093	5.2
1378	0	55	1	2	1	0	0	0	1	1	1	0	27.12	6.7	6	5.9	5.9	6	80	124	85	37	72	86.4989	28	0	0	1	0	2	0	0	0	0	0						0	2	12.4	8.5	7.2	8.64989	2.8
1379	0	44	1	3	1	0	0	2	1	1	1	0	29.19	7	6.7	6.6	6.3	6.5	91.6667	187	239	43	108	75.8952	20	0	1	1	0	2	0	0	0	0	0						0	2	18.7	23.9	10.8	7.58952	2
1380	0	58	0	1	0	0	0	0	1	0	1	1	28.51	5.1	5	5.1	5.3	5.2	112.333	194	131	40	128	90.4	20	0	1	0	1	1	0	0	0	0	0						0	2	19.4	13.1	12.8	9.04	2
1381	0	54	0	2	0	0	0	2	1	1	1	0	23.24	6.2	6.3	6.5	6.3	6	112	204	124	46	123	147.151	20	0	1	0	0	2	1	0	0	0	0						0	2	20.4	12.4	12.3	14.7151	2
1382	0	58	1	1	1	1	0	0	1	1	1	0	24.52	5.4	5.4	5.2	5.2	5.3	93.3333	125	80	30	72	99.2879	21	1	0	0	0	1	0	1	0	0	0						0	2	12.5	8	7.2	9.92879	2.1
1383	0	56	1	3	0	0	0	2	1	#NULL!	#NULL!	1	23.77	6.6	6	5.8	5.6	5.9	96	112	161	30	52	93.2409	12	0	1	0	0	2	1	0	0	0	0						0	2	11.2	16.1	5.2	9.32409	1.2
1384	0	58	0	2	0	0	1	2	1	1	0	1	28.55	6.4	6.1	5.9	6	5.9	92.3333	128	61	47	62	118.482	28	0	0	1	0	1	0	0	0	0	0						0	2	12.8	6.1	6.2	11.8482	2.8
1385	1	58	1	2	1	0	0	0	1	1	1	0	30.71	7.7	8.1	7.8	8.8	7.5	96.6667	163	153	35	100	94.3128	33	0	1	0	0	1	0	0	0	0	0						1	2	16.3	15.3	10	9.43128	3.3
1386	0	37	0	2	1	0	0	0	1	1	1	1	24.76	7.1	6.4	6.5	6.3	6.3	85.3333	130	93	42	71	149.106	13	2	0	1	0	1	0	0	0	0	0						0	2	13	9.3	7.1	14.9106	1.3
1387	0	57	1	2	0	0	0	1	1	1	1	0	21.4	4.2	4.2	4.7	4.5	4.9	106.667	192	127	51	115	74.4357	66	0	0	0	0	1	0	0	0	0	0						0	2	19.2	12.7	11.5	7.44357	6.6
1388	0	31	1	3	1	0	0	1	1	1	1	1	22.86	6.7	6	6.2	6.6	6.1	90.6667	127	48	40	71	102.35	44	0	0	1	0	2	0	0	0	0	0						0	2	12.7	4.8	7.1	10.235	4.4
1389	1	61	0	1	0	0	0	0	1	1	1	0	32.76	5.9	7.8	7.8	7.8	7.2	106	145	77	50	80	122.19	73	0	1	1	0	2	0	0	0	0	0						1	2	14.5	7.7	8	12.219	7.3
1390	0	31	1	2	1	1	0	2	1	1	1	0	42.66	6.3	6.6	6.1	6	6.3	90	143	179	33	76	104.458	159	2	0	0	0	2	0	0	0	0	0						0	2	14.3	17.9	7.6	10.4458	15.9
1391	0	61	0	1	0	0	0	2	1	1	1	1	29.16	6.8	6.6	6.3	6.3	6.7	91.6667	162	97	41	95	91.0471	24	0	0	1	0	1	0	0	0	0	0						0	2	16.2	9.7	9.5	9.10471	2.4
1392	0	41	1	3	0	0	0	1	1	1	1	1	32.41	6.8	6.6	6.3	6.8	6.6	86.6667	204	779	30	71	107.56	53	0	1	0	0	1	0	0	0	0	0						0	2	20.4	77.9	7.1	10.756	5.3
1393	1	59	1	1	0	1	0	0	1	1	1	0	26.96	6.1	7	8.5	8.3	8.3	90	229	475	31	121	71.264	60	2	0	1	1	1	0	0	0	0	0						1	2	22.9	47.5	12.1	7.1264	6
1394	1	50	1	2	1	0	0	0	1	#NULL!	#NULL!	1	15.46	7.8	7.5	8	7.3	7.3	99.6667	168	73	48	99	117.43	18	2	1	0	0	2	1	0	0	0	0						1	2	16.8	7.3	9.9	11.743	1.8
1395	0	62	0	1	0	0	0	2	1	1	0	0	27.58	7.3	6.3	6.7	6.5	6.8	98.3333	207	265	38	128	127.968	21	0	1	1	0	2	0	0	0	0	0						0	2	20.7	26.5	12.8	12.7968	2.1
1396	0	43	1	2	0	1	1	0	1	1	1	1	27.16	5.7	5.9	5.9	5.8	5.5	105	186	55	69	84	79.71	21	0	0	0	1	3	0	0	0	0	0						0	2	18.6	5.5	8.4	7.971	2.1
1397	0	48	0	1	0	0	0	0	1	0	1	0	25.91	6.2	6.2	6.2	5.9	5.6	111	171	109	33	100	106.7	14	0	1	0	0	2	1	0	0	0	0						0	2	17.1	10.9	10	10.67	1.4
1398	0	34	1	2	1	0	0	1	1	#NULL!	#NULL!	1	27.35	7.6	5.9	5.9	6.2	6.1	90.6667	185	84	42	132	140.62	15	2	0	0	0	1	0	0	0	0	0						0	2	18.5	8.4	13.2	14.062	1.5
1399	0	58	1	3	1	0	0	2	1	1	1	1	23.76	6.5	6.5	6.8	7.2	6.9	82	133	36	44	74	108.635	12	2	0	0	0	1	0	0	0	0	0						0	2	13.3	3.6	7.4	10.8635	1.2
1400	0	61	1	2	1	0	1	1	1	1	0	0	22.03	5.4	6.3	5.7	5.7	5.7	103	306	225	53	183	110.982	14	0	1	1	0	1	0	0	0	1	0						0	2	30.6	22.5	18.3	11.0982	1.4
1401	0	34	1	3	1	0	0	1	1	#NULL!	#NULL!	0	28.44	7.6	6.8	6.8	6.5	6.6	99.6667	211	193	44	148	94.1752	57	0	0	1	0	1	0	0	0	0	0						0	2	21.1	19.3	14.8	9.41752	5.7
1402	0	44	1	3	1	0	0	0	1	1	1	1	22.02	6.4	6.4	6.3	6.5	6.9	91.3333	186	137	43	108	102.06	18	0	0	0	0	1	0	0	0	0	0						0	2	18.6	13.7	10.8	10.206	1.8
1403	0	50	1	2	1	1	0	2	1	1	1	0	28.26	7.6	6.8	6.5	6	5.9	119.333	168	206	30	88	76.44	21	0	1	1	0	2	1	0	0	0	0						0	2	16.8	20.6	8.8	7.644	2.1
1404	1	36	1	3	1	0	0	0	1	#NULL!	#NULL!	0	34.56	6.6	6.4	6.2	6.6	7.1	111	201	218	47	120	119.678	69	0	1	1	0	4	1	0	0	0	0						1	2	20.1	21.8	12	11.9678	6.9
1405	0	59	0	1	0	0	0	2	1	0	1	0	26.63	6.9	6.1	5.9	5.7	6.1	101	161	62	61	99	78.8237	13	0	0	0	0	1	0	0	0	0	0						0	1	16.1	6.2	9.9	7.88237	1.3
1406	0	36	1	3	1	1	0	0	1	0	1	0	28.38	6.9	6.2	6	6.4	6.1	103	151	356	31	67	68.5068	52	0	0	1	0	1	0	0	0	1	0						0	1	15.1	35.6	6.7	6.85068	5.2
1407	1	38	0	2	1	0	0	1	1	1	1	0	28.46	7.8	7.2	6.5	6.5	7.1	101	174	158	51	114	80.2749	64	0	1	0	0	3	0	1	0	1	0						1	1	17.4	15.8	11.4	8.02749	6.4
1408	0	53	1	2	1	1	0	0	1	1	0	0	32.49	5.7	5.7	5.9	5.8	5.8	106.667	195	72	45	137	94.8186	71	0	1	0	0	2	0	0	0	0	0						0	1	19.5	7.2	13.7	9.48186	7.1
1409	1	52	1	1	0	0	0	2	1	1	1	0	25.83	7.2	7	7	7.9	7.7	100	182	244	48	103	75.7132	27	0	0	0	0	1	0	0	0	0	0						1	1	18.2	24.4	10.3	7.57132	2.7
1410	0	46	0	3	1	0	0	0	1	1	1	0	22.73	5.5	5.4	6	5.4	5.4	77.6667	264	95	63	184	97.2976	19	0	0	1	0	2	0	0	0	0	0						0	1	26.4	9.5	18.4	9.72976	1.9
1411	0	60	0	1	0	0	0	1	1	1	1	0	21.33	6.4	6.4	6.8	6.6	7	81.3333	196	39	62	128	78.8237	18	0	0	0	0	1	0	0	0	0	0						0	1	19.6	3.9	12.8	7.88237	1.8
1412	1	61	0	0	1	0	0	0	1	0	1	0	21.76	6.4	7.7	7.7	7.9	8.1	86.6667	180	86	62	106	84.7897	24	0	0	0	0	1	0	0	1	0	0						1	1	18	8.6	10.6	8.47897	2.4
1413	0	62	0	1	1	0	0	2	1	0	1	0	29.59	7	6.3	6.2	6.6	6.5	96.3333	157	232	40	87	122.197	21	0	1	0	0	1	0	0	0	0	0						0	1	15.7	23.2	8.7	12.2197	2.1
1414	1	32	1	2	0	1	0	0	1	0	1	1	26.09	6.2	7.9	7.9	9.4	9.4	89.6667	201	753	34	68	97.79	45	2	1	1	1	1	0	0	0	0	0						1	2	20.1	75.3	6.8	9.779	4.5
1415	0	54	0	2	0	0	0	2	0	1	0	0	28.34	6.1	6	5.8	5.9	5.7	109	162	125	43	90	107.813	21	0	0	1	0	3	0	0	0	0	0						0	2	16.2	12.5	9	10.7813	2.1
1416	0	42	1	3	1	0	1	2	1	1	1	1	26.73	7.2	5.4	5.4	5.5	5.8	102	230	110	45	173	67.374	23	0	0	1	0	1	0	0	0	0	0						0	1	23	11	17.3	6.7374	2.3
1417	1	53	1	1	1	0	0	1	1	1	1	0	30.49	7.8	6.8	6.7	7.9	7.5	106	217	73	44	161	88.0851	17	2	0	1	0	2	0	0	0	0	0						1	1	21.7	7.3	16.1	8.80851	1.7
1418	0	57	1	1	0	0	0	2	1	1	1	0	27.34	6.8	5.7	5.6	5.9	6.3	106.667	146	110	48	85	77.0186	21	0	0	0	0	1	0	0	0	0	0						0	1	14.6	11	8.5	7.70186	2.1
1419	0	43	0	3	0	0	0	2	1	1	1	0	30.1	6.4	6.4	6.7	6.7	6.8	84.6667	195	161	36	142	151.229	59	0	0	0	0	3	0	0	0	0	0						0	2	19.5	16.1	14.2	15.1229	5.9
1420	0	60	1	1	0	0	0	2	1	1	1	0	23.94	6.7	6.4	6.4	6.4	6.4	107	156	58	63	87	66.6407	13	0	0	0	0	1	0	0	0	0	0						0	1	15.6	5.8	8.7	6.66407	1.3
1421	0	34	1	1	0	0	0	0	1	1	0	1	21.75	6.3	6.2	6.1	6.3	6	88.3333	187	1785	29	32	160.381	34	0	0	0	1	2	0	0	0	0	0						0	2	18.7	178.5	3.2	16.0381	3.4
1422	0	55	1	2	0	0	0	2	1	0	1	1	25.71	6.5	6	5.1	5.8	5.6	98.3333	136	121	51	61	39.3695	23	1	0	1	0	4	0	1	0	0	0						0	1	13.6	12.1	6.1	3.93695	2.3
1423	0	53	1	1	1	0	1	0	1	1	1	0	22.59	5.9	5.9	5.9	6.2	6.1	118.667	205	290	41	131	62.3754	18	0	1	0	1	1	0	0	0	0	0						0	1	20.5	29	13.1	6.23754	1.8
1424	0	44	0	1	0	1	0	1	1	0	1	0	35.02	7.7	7.9	7.9	10	6.3	84	129	103	36	82	90.9029	33	0	0	1	0	3	0	0	0	0	0						0	1	12.9	10.3	8.2	9.09029	3.3
1425	0	52	1	2	1	1	0	0	1	0	0	0	30.74	7.4	6.8	6.5	6.8	6.8	95	157	119	33	103	98.66	32	0	1	1	0	1	0	1	0	0	0						0	1	15.7	11.9	10.3	9.866	3.2
1426	0	63	1	3	0	0	0	2	1	1	1	1	27.78	6.6	6.6	7	6.8	6.9	93.6667	199	208	45	99	90.4361	21	0	1	0	0	2	1	0	0	0	0						0	2	19.9	20.8	9.9	9.04361	2.1
1427	0	63	0	1	1	0	0	2	1	1	1	1	24.46	7	6.2	6.3	6.7	6.9	81.3333	196	124	43	129	116.51	12	0	1	1	0	3	0	0	0	0	0						0	2	19.6	12.4	12.9	11.651	1.2
1428	1	53	0	2	1	0	0	2	1	1	1	0	21.61	6.2	6.9	6.5	7.2	7.5	74	145	76	66	76	74.7481	35	0	0	1	0	1	0	0	0	0	0						1	1	14.5	7.6	7.6	7.47481	3.5
1429	1	63	0	2	0	0	0	2	1	0	1	0	22.24	7.1	6.7	6.7	6.8	8.1	84.6667	206	133	49	124	121.798	53	0	1	1	0	1	0	0	0	0	0						1	2	20.6	13.3	12.4	12.1798	5.3
1430	0	33	0	3	1	0	0	0	1	#NULL!	#NULL!	1	25.21	6.6	6.2	6.2	5.7	5.8	83.6667	210	119	45	137	141.095	15	0	0	0	0	1	1	0	0	0	0						0	2	21	11.9	13.7	14.1095	1.5
1431	0	39	0	2	1	0	0	0	1	1	1	0	32.16	7.2	6.6	6.3	6	6.7	97.3333	193	126	44	138	123.969	104	0	1	1	0	1	0	0	0	0	0						0	1	19.3	12.6	13.8	12.3969	10.4
1432	0	39	1	2	0	1	0	2	1	1	1	0	29.92	6.9	6	5.9	6.1	6.3	103.333	165	199	39	109	77.7766	101	0	1	0	0	2	0	0	0	0	0						0	1	16.5	19.9	10.9	7.77766	10.1
1433	1	64	1	1	0	0	0	2	1	1	1	1	19.9	7.6	7.6	7.3	7.2	7.4	95	149	62	50	79	33.0206	26	2	1	1	0	2	0	0	0	0	0						1	2	14.9	6.2	7.9	3.30206	2.6
1434	0	51	1	2	1	1	0	0	1	1	1	0	28.88	6.7	5.9	5.6	5.5	5.5	79	114	143	32	66	83.7731	30	0	1	1	1	2	0	0	0	0	0						0	2	11.4	14.3	6.6	8.37731	3
1435	0	38	1	3	0	0	0	0	1	1	1	0	30.12	6.6	6.4	6.2	7.3	7	90.6667	136	64	40	81	95.16	78	0	1	1	0	1	0	0	0	0	0						0	1	13.6	6.4	8.1	9.516	7.8
1436	0	62	1	2	0	1	0	2	1	1	1	0	25.98	7.3	6.1	5.9	5.9	6.2	99.6667	152	283	27	89	70.8884	19	0	0	0	1	1	0	0	0	0	0						0	1	15.2	28.3	8.9	7.08884	1.9
1437	0	59	0	2	0	0	0	2	1	1	1	1	32.92	7.3	5.9	5.9	5.6	6.2	117.667	259	146	38	190	184.496	20	2	1	1	1	1	0	0	0	0	0						0	2	25.9	14.6	19	18.4496	2
1438	0	55	0	2	1	0	0	1	1	#NULL!	#NULL!	0	21.46	7.4	6	6.4	6.3	6.3	99	162	69	58	96	92.9811	16	0	1	0	0	3	0	0	0	0	0						0	1	16.2	6.9	9.6	9.29811	1.6
1439	1	54	0	2	1	0	0	1	1	1	1	1	23.02	6.6	7.2	7.2	7.2	7.2	107	211	208	39	149	125.2	30	0	1	1	0	1	0	0	0	0	0						1	1	21.1	20.8	14.9	12.52	3
1440	0	54	0	2	0	0	0	2	1	1	1	0	22.18	6.4	6	6.1	6	5.9	90.6667	155	179	46	79	83.079	28	0	0	1	1	1	0	0	0	0	0						0	2	15.5	17.9	7.9	8.3079	2.8
1441	0	50	0	2	0	0	0	2	1	1	1	0	30.27	6.1	6.4	7.5	6.9	6.1	117.333	184	150	61	101	74.84	84	0	0	1	0	3	0	0	1	0	0						0	2	18.4	15	10.1	7.484	8.4
1442	1	58	0	2	1	0	0	0	1	1	1	1	26.07	6.3	6.1	6.3	6.8	7.1	95	182	284	40	79	89.18	19	0	1	1	0	1	0	0	0	0	0						1	2	18.2	28.4	7.9	8.918	1.9
1443	0	37	1	2	1	1	0	1	1	1	1	0	35.1	7.3	7.9	8	7.1	7	109.667	150	194	38	89	120.245	24	0	1	1	0	4	1	0	0	0	0						0	2	15	19.4	8.9	12.0245	2.4
1444	0	38	0	3	1	0	0	0	1	1	1	1	31.62	5.9	5.2	5.4	5.7	5.8	96.6667	206	134	50	118	177.932	228	2	1	0	0	1	0	0	0	0	0						0	2	20.6	13.4	11.8	17.7932	22.8
1445	0	60	1	2	1	0	0	1	1	1	1	0	31.4	7.5	6.4	6.6	6.4	6.8	81	153	178	33	88	65.5247	20	0	1	1	0	3	1	1	0	1	0						0	2	15.3	17.8	8.8	6.55247	2
1446	0	61	0	1	0	0	0	1	1	0	1	0	31.66	7.9	6.6	6.5	6.1	6.2	107.667	192	104	44	131	82.349	19	0	0	1	0	1	0	0	0	0	0						0	2	19.2	10.4	13.1	8.2349	1.9
1447	0	59	1	2	1	0	0	0	1	1	1	1	28.89	6.9	6.5	6.7	5.6	5.6	89.6667	123	91	29	69	87.2456	31	0	1	0	0	1	0	0	0	0	0						0	2	12.3	9.1	6.9	8.72456	3.1
1448	0	58	0	2	1	0	0	2	1	1	1	0	32.25	6.9	6.5	6.8	6.5	6.5	86	150	138	40	92	95.3091	20	0	1	1	0	1	0	0	0	0	0						0	2	15	13.8	9.2	9.53091	2
1449	0	54	0	2	0	0	0	0	1	0	0	0	27.34	6.5	6.4	7.2	6.8	6.9	93.3333	151	130	41	84	81.78	37	0	1	1	0	1	0	0	0	0	0						0	2	15.1	13	8.4	8.178	3.7
1450	0	41	0	3	1	0	0	0	1	1	1	1	27.42	7.3	7.1	6.9	7.2	7	108	184	106	38	133	108.088	29	0	0	1	0	3	0	0	0	0	0						0	2	18.4	10.6	13.3	10.8088	2.9
1451	0	46	1	3	1	0	0	2	1	1	1	0	25.08	6.6	6	6.6	6.6	6.2	93.3333	136	94	55	51	97.0395	27	0	0	1	0	1	0	1	0	0	0						0	2	13.6	9.4	5.1	9.70395	2.7
1452	0	45	0	2	1	0	0	0	1	1	1	0	25.2	6.7	6.6	7	7.1	6.9	95.3333	143	124	40	81	165.04	24	2	0	0	0	1	0	0	0	0	0						0	2	14.3	12.4	8.1	16.504	2.4
1453	1	33	1	2	0	1	0	0	1	1	0	0	32.45	5.7	4.8	4.8	4.8	11	86.6667	125	193	26	62	119.939	39	0	1	0	0	3	0	0	1	0	0						1	2	12.5	19.3	6.2	11.9939	3.9
1454	1	41	0	1	0	0	0	0	1	1	1	1	28.3	7.1	7	7.5	7.2	8	89	125	123	45	69	139.17	13	0	0	1	0	1	0	0	0	0	0						1	2	12.5	12.3	6.9	13.917	1.3
1455	0	64	0	1	1	0	0	2	1	1	1	1	23.56	5.8	5.6	5.5	5.5	5.9	90.3333	222	225	44	127	139.83	17	1	1	1	0	3	0	0	0	0	0						0	2	22.2	22.5	12.7	13.983	1.7
1456	0	61	1	2	0	0	0	2	1	1	1	0	25.1	7.6	6.7	6.7	6.7	6.8	96.6667	200	195	46	120	77.7573	21	0	1	1	0	1	0	0	0	0	0						0	2	20	19.5	12	7.77573	2.1
1457	0	60	0	1	0	0	0	2	1	1	1	1	32.43	7.6	6.4	6	5.7	6.1	106	237	172	52	146	94.6554	30	0	1	1	0	3	1	0	0	0	0						0	2	23.7	17.2	14.6	9.46554	3
1458	0	61	1	1	0	0	1	2	1	1	1	0	25.55	6.4	6.1	6.2	6.4	6.5	92	191	170	44	120	116.569	27	0	0	1	0	2	0	0	1	0	0						0	2	19.1	17	12	11.6569	2.7
1459	0	41	1	3	1	0	0	2	1	1	0	1	23.01	4.9	5.2	4.9	5	5	105	156	74	55	75	114.768	14	2	0	1	0	2	0	0	0	0	0						0	2	15.6	7.4	7.5	11.4768	1.4
1460	0	61	0	2	0	0	0	2	1	1	0	0	22.14	6.4	5.7	5.9	6	6	95.3333	222	59	75	123	69.8882	17	0	0	0	0	3	1	0	0	0	0						0	2	22.2	5.9	12.3	6.98882	1.7
1461	0	54	1	2	1	0	0	2	1	1	1	1	29.57	7.4	7.5	7.4	7.1	7	104.333	157	114	43	93	115.614	61	0	0	1	0	1	0	0	0	0	0						0	2	15.7	11.4	9.3	11.5614	6.1
1462	0	53	0	2	1	0	0	0	1	1	1	1	28.3	7.5	7.6	6.7	6.7	6.6	96	176	163	47	98	130.391	14	0	0	0	0	4	1	0	0	0	0						0	2	17.6	16.3	9.8	13.0391	1.4
1463	1	37	0	2	1	0	0	0	1	1	1	0	21.48	6.3	6.2	6.6	7.6	7.6	71.6667	162	40	58	82	116.977	12	0	0	0	0	1	0	0	0	0	0						1	2	16.2	4	8.2	11.6977	1.2
1464	0	47	1	2	0	0	0	0	1	0	1	0	24.44	7.5	5.7	5.8	6.6	5.9	93.3333	203	236	44	134	71.7522	35	0	1	1	0	1	0	0	0	0	0						0	1	20.3	23.6	13.4	7.17522	3.5
1465	0	58	0	1	1	0	0	0	1	0	1	0	28.47	6.3	6.3	7.1	7.4	7	104.667	195	116	53	121	56.7491	26	0	1	1	0	1	0	0	0	1	0						0	1	19.5	11.6	12.1	5.67491	2.6
1466	0	59	1	1	1	0	0	0	1	0	1	0	25.35	7.1	6.3	6.3	6.1	6	105	223	78	56	148	61.7587	15	0	1	1	0	3	0	0	0	0	0						0	1	22.3	7.8	14.8	6.17587	1.5
1467	0	45	1	3	0	0	0	1	1	1	1	0	36.38	6.8	6.2	6.1	6.1	6.3	103.667	144	180	37	80	112.62	38	0	0	1	0	4	1	0	0	0	0						0	2	14.4	18	8	11.262	3.8
1468	1	62	1	1	0	1	0	0	1	1	1	0	25.63	5.9	5.8	8.8	8.5	8	101.333	179	151	35	113	67.829	8	2	1	1	0	4	0	0	0	0	0						1	1	17.9	15.1	11.3	6.7829	0.8
1469	0	58	1	1	0	1	0	0	1	0	1	0	24.61	7.6	6.4	7.2	7.1	6.7	93.6667	161	102	29	112	68.7535	12	2	0	0	0	2	0	0	0	0	0						0	1	16.1	10.2	11.2	6.87535	1.2
1470	0	53	1	2	1	0	0	1	1	1	1	0	22.7	6.4	6.4	5.8	5.9	5.7	82	183	189	35	113	106.948	25	0	0	0	0	1	0	0	0	0	0						0	2	18.3	18.9	11.3	10.6948	2.5
1471	0	58	1	1	0	0	0	0	1	1	1	0	29.73	5.7	6.2	6	7.7	7	97.3333	152	159	42	86	63.807	59	0	1	1	0	3	1	0	1	0	0						0	2	15.2	15.9	8.6	6.3807	5.9
1472	0	57	1	1	0	0	0	0	1	1	1	0	26.56	5.2	5.6	5.8	6.5	6.1	102	187	88	46	125	77.0186	37	0	1	1	0	3	1	0	1	0	0						0	1	18.7	8.8	12.5	7.70186	3.7
1473	1	49	1	2	1	1	0	0	1	0	1	1	33.53	6.6	7.4	7.3	7.9	7.6	99	160	406	35	63	76.6199	38	0	0	1	1	2	0	0	0	0	0						1	1	16	40.6	6.3	7.66199	3.8
1474	0	52	0	1	0	0	0	2	1	0	0	0	30.8	6.8	6.9	7.2	6.4	6.7	100	194	115	61	108	87.8719	19	0	0	1	0	1	0	0	0	0	0						0	1	19.4	11.5	10.8	8.78719	1.9
1475	0	55	0	2	0	0	0	0	1	1	0	1	19.53	6.9	6.9	7	7	6.5	97	176	65	55	111	86.8771	30	1	1	0	0	2	0	0	0	0	0						0	1	17.6	6.5	11.1	8.68771	3
1476	1	53	1	2	1	0	0	2	1	1	1	0	30.1	7.5	6.8	6.8	7.6	8	106.333	181	92	41	116	74.42	54	0	1	0	0	3	0	0	0	1	0						1	2	18.1	9.2	11.6	7.442	5.4
1477	1	61	0	1	1	0	0	2	1	1	1	0	26.55	7.9	9.3	11.3	9.2	9.7	121.667	218	183	56	127	99.71	19	0	1	1	0	2	1	1	0	0	0						1	2	21.8	18.3	12.7	9.971	1.9
1478	0	42	1	2	1	1	1	0	1	1	1	1	22.67	6.6	6.2	5.9	6.1	6.2	86.3333	153	112	45	98	93.29	24	0	0	0	0	1	0	0	0	0	0						0	2	15.3	11.2	9.8	9.329	2.4
1479	1	62	1	1	0	1	1	2	1	0	1	0	24.02	7.3	6.8	6.9	6.9	7.5	91.6667	213	177	46	144	81.4743	23	0	1	1	0	2	0	0	0	0	0						1	1	21.3	17.7	14.4	8.14743	2.3
1480	0	60	1	1	1	0	0	1	1	1	1	1	20.2	5.8	5.2	5.7	5.7	5.4	80	200	269	36	100	37.5852	5	0	1	1	1	2	0	0	1	0	0						0	2	20	26.9	10	3.75852	0.5
1481	0	58	0	2	1	0	0	1	1	#NULL!	#NULL!	1	23.24	7.7	6.7	6.5	6.5	6.7	103.333	167	69	71	75	156.79	24	0	0	1	0	1	0	0	0	0	0						0	2	16.7	6.9	7.5	15.679	2.4
1482	0	45	1	3	1	0	0	2	1	#NULL!	#NULL!	0	31.22	6.8	7.9	6.8	6.7	6.7	128.333	189	206	42	121	70.5882	86	0	1	0	0	1	0	0	0	0	0						0	1	18.9	20.6	12.1	7.05882	8.6
1483	0	54	0	1	0	0	0	2	1	1	1	0	27.69	7	6.6	6.7	6.6	6.9	91.6667	220	110	51	148	83.079	18	0	0	1	0	2	0	0	1	0	0						0	2	22	11	14.8	8.3079	1.8
1484	0	47	1	2	1	0	0	2	1	1	1	0	32.99	5.7	5.6	6.1	6.6	6.6	114.333	165	128	42	100	117.847	59	2	0	0	0	1	0	0	0	0	0						0	1	16.5	12.8	10	11.7847	5.9
1485	1	57	1	2	0	1	1	1	1	1	1	0	21.34	7.2	6.8	7.6	7.6	7.2	86.6667	191	60	38	130	92.5791	15	0	0	1	0	1	0	0	0	0	0						1	2	19.1	6	13	9.25791	1.5
1486	0	57	1	2	0	0	0	0	1	1	0	1	22.43	7.6	6.4	6.5	6.8	6.4	93.3333	192	175	54	118	86.976	26	0	0	0	0	1	0	0	0	0	0						0	1	19.2	17.5	11.8	8.6976	2.6
1487	0	51	1	2	0	0	0	2	1	1	1	0	27.55	6.1	6.2	6.2	6.2	6.5	102.667	167	142	41	117	78.7773	26	0	1	0	1	2	0	0	0	0	0						0	1	16.7	14.2	11.7	7.87773	2.6
1488	1	33	1	2	1	0	1	2	1	0	1	0	31.2	7.4	7.1	7.4	7.4	7.4	96	210	201	45	144	104.29	64	0	0	1	0	1	0	0	0	0	0						1	1	21	20.1	14.4	10.429	6.4
1489	0	56	0	2	0	0	0	2	1	1	1	0	27.17	6.9	5.6	5.8	6.5	6.3	108	178	73	45	118	89.5	32	0	1	1	0	2	0	0	0	0	0						0	2	17.8	7.3	11.8	8.95	3.2
1490	0	62	1	1	0	0	0	1	1	1	0	1	25.48	6.3	6.9	6.7	6.3	6	92	144	169	30	83	122.3	17	2	1	0	0	4	1	0	0	0	0						0	2	14.4	16.9	8.3	12.23	1.7
1491	0	32	0	2	1	0	0	1	1	#NULL!	#NULL!	0	27.82	7	7.2	6.6	6.8	6.8	97	237	401	49	127	121.553	41	0	0	0	1	1	0	0	0	0	0						0	2	23.7	40.1	12.7	12.1553	4.1
1492	0	63	1	1	0	0	0	2	1	1	1	1	31.21	6.4	5.5	6.3	6.1	6	82.6667	168	73	48	106	65.54	42	0	1	1	0	2	0	0	0	0	0						0	2	16.8	7.3	10.6	6.554	4.2
1493	0	57	1	1	0	0	0	2	1	1	1	1	29.83	6	6.6	6.2	6.4	5.8	104.667	202	126	29	139	99.6391	49	0	1	1	0	4	0	0	0	0	0						0	1	20.2	12.6	13.9	9.96391	4.9
1494	0	48	0	3	1	0	0	2	0	1	1	0	27.02	5.9	6.4	6.9	7.2	6.1	111.333	118	99	45	57	115.54	100	0	1	1	0	1	0	1	0	0	0						0	2	11.8	9.9	5.7	11.554	10
1495	0	62	0	1	0	0	0	2	1	1	1	0	26.77	6.3	6.5	6.1	6.4	6.3	88.3333	172	141	67	84	161.17	60	0	1	1	0	2	0	0	0	0	0						0	2	17.2	14.1	8.4	16.117	6
1496	0	64	1	3	0	0	0	2	1	1	0	1	26.26	7.4	7.1	6	6.1	6.9	98	163	42	43	112	104.849	18	0	1	0	0	3	0	0	1	0	0						0	2	16.3	4.2	11.2	10.4849	1.8
1497	1	53	1	3	0	0	0	0	1	1	1	1	30.49	7.6	6.9	7.7	7.5	7.4	103	168	141	24	123	77.0176	23	0	1	0	1	1	0	0	0	0	0						1	1	16.8	14.1	12.3	7.70176	2.3
1498	0	46	0	1	0	0	0	0	1	1	1	0	31.32	6.3	5.7	6.7	6.4	6.6	124.667	203	38	108	80	135.369	32	0	1	0	0	1	0	0	0	0	0						0	1	20.3	3.8	8	13.5369	3.2
1499	0	36	0	3	1	0	0	0	1	1	1	0	23.3	6.7	6.5	6.1	6.3	6.2	77.3333	241	156	44	168	110.979	13	0	0	1	0	1	0	0	0	0	0						0	2	24.1	15.6	16.8	11.0979	1.3
1500	0	49	1	1	1	0	0	0	1	1	1	0	26.01	5.3	5.4	5.5	5.7	5.6	98.6667	144	49	32	96	95.8	34	0	1	0	0	1	0	0	0	0	0						0	2	14.4	4.9	9.6	9.58	3.4
1501	0	60	1	2	0	0	0	2	1	1	1	1	26.51	6.7	5.9	6.1	6.2	6.3	106.333	169	135	37	102	74.4987	35	0	1	0	1	1	0	0	0	0	0						0	2	16.9	13.5	10.2	7.44987	3.5
1502	0	62	0	2	0	0	0	2	1	1	1	0	26.17	6.5	5.9	6.1	6.1	6.1	90.3333	152	77	58	79	109.337	21	0	0	1	0	1	0	0	0	0	0						0	2	15.2	7.7	7.9	10.9337	2.1
1503	0	48	0	3	1	0	0	2	1	1	1	0	27.63	6.5	5.9	5.9	5.9	5.8	126.333	170	197	47	94	166.247	24	0	1	1	0	2	1	0	0	0	0						0	2	17	19.7	9.4	16.6247	2.4
1504	0	49	1	3	0	0	0	0	1	1	1	0	27.32	7.1	6.3	6.2	6.2	6.1	87	172	121	39	111	98.47	86	0	1	0	0	2	0	0	0	0	0						0	2	17.2	12.1	11.1	9.847	8.6
1505	0	53	1	2	0	1	0	0	0	1	1	0	24.47	6.7	6.3	6	6.6	6.7	99	206	153	46	127	89.1438	31	0	0	1	0	1	0	0	0	0	0						0	2	20.6	15.3	12.7	8.91438	3.1
1506	0	62	1	2	0	0	0	0	1	0	1	0	22.62	7.5	6.5	6.6	7	6.9	81.6667	164	76	35	110	129.046	16	0	0	1	0	3	0	0	0	0	0						0	2	16.4	7.6	11	12.9046	1.6
1507	0	45	1	2	1	0	0	0	1	1	1	1	46.55	7.1	6.3	6	6.2	6.3	85	176	67	40	124	87.8856	36	0	1	1	0	1	0	0	0	0	0						0	2	17.6	6.7	12.4	8.78856	3.6
1508	1	47	1	2	1	0	0	0	1	1	1	0	26.42	7.7	8.4	8.9	8.4	9.5	110.333	150	47	40	93	158.989	28	0	1	0	0	1	0	0	0	0	0						1	2	15	4.7	9.3	15.8989	2.8
1509	0	38	1	3	1	0	0	0	1	1	1	0	25.64	7.1	6.3	6	6.1	6.4	96	203	169	36	137	71.89	18	2	0	0	0	1	0	0	0	0	0						0	2	20.3	16.9	13.7	7.189	1.8
1510	0	56	0	2	1	0	0	2	1	1	1	0	24.23	6.2	5.9	6	6	6.1	67.3333	161	149	45	84	83.79	26	0	0	1	1	2	0	0	0	0	0						0	2	16.1	14.9	8.4	8.379	2.6
1511	0	52	0	2	0	0	1	0	1	1	1	1	26.3	7.1	6.5	6.4	6.7	6.4	80.3333	261	386	49	149	92.4279	17	0	0	1	0	1	0	0	0	0	0						0	2	26.1	38.6	14.9	9.24279	1.7
1512	0	38	1	2	1	0	0	0	1	1	1	0	31.76	7.8	6.9	6.6	6.4	6.3	100	199	124	31	152	90.45	35	0	1	1	0	1	0	0	0	0	0						0	2	19.9	12.4	15.2	9.045	3.5
1513	0	45	0	1	1	0	0	0	1	1	1	0	20.04	7.8	7.8	6.6	6.7	6.1	96.3333	169	71	58	92	298.995	15	0	0	0	0	1	0	0	0	0	0						0	2	16.9	7.1	9.2	29.8995	1.5
1514	1	60	1	2	0	1	0	1	1	1	1	1	26.04	6.9	6.5	6.6	6.9	7.3	89.3333	153	262	28	80	123.266	27	0	0	0	0	1	0	0	0	0	0						1	2	15.3	26.2	8	12.3266	2.7
1515	1	39	1	2	1	1	1	0	1	1	1	1	26.76	7.6	5.7	5.9	6.2	7.1	108.333	179	166	56	98	110.809	33	0	1	0	0	1	0	0	0	0	0						1	2	17.9	16.6	9.8	11.0809	3.3
1516	0	52	0	2	0	0	0	2	1	1	1	0	21.03	5.8	5.3	5.2	5.2	5.6	103.667	246	58	75	146	78.7196	14	0	1	0	0	3	0	0	0	1	0						0	2	24.6	5.8	14.6	7.87196	1.4
1517	0	63	0	2	1	0	0	0	1	1	0	0	25.56	7.2	6.4	6.4	6.7	6.8	110	183	74	51	119	84.51	17	0	1	1	0	1	0	0	0	0	0						0	2	18.3	7.4	11.9	8.451	1.7
1518	1	64	1	2	0	0	0	2	1	#NULL!	#NULL!	1	36.26	6.2	5.9	6.8	9.4	9.4	99.6667	180	88	50	123	77.92	14	0	0	1	0	1	1	0	0	0	0						1	2	18	8.8	12.3	7.792	1.4
1519	0	53	1	2	1	0	1	1	1	1	1	1	29.3	6.8	5.4	5.4	6.2	5.8	100.667	231	76	40	168	94.8186	25	0	0	1	0	1	0	0	0	0	0						0	2	23.1	7.6	16.8	9.48186	2.5
1520	0	55	0	1	1	0	0	2	1	0	1	0	25.57	7.2	6.8	6.9	6.5	6.7	114	166	94	60	84	86.5599	19	0	1	1	0	3	0	0	0	0	0						0	2	16.6	9.4	8.4	8.65599	1.9
1521	1	36	1	2	1	0	0	1	1	1	1	0	25.7	6.8	7.3	8.3	7	7.1	139.333	151	214	33	81	107.82	38	2	1	1	0	2	0	0	0	0	0						1	2	15.1	21.4	8.1	10.782	3.8
1522	0	39	1	3	0	1	1	0	1	#NULL!	#NULL!	1	38.25	7	7.1	6.7	6.7	6.4	121	120	95	42	62	113.595	35	0	1	1	0	3	1	0	0	0	0						0	2	12	9.5	6.2	11.3595	3.5
1523	1	48	0	2	1	0	0	0	1	1	1	1	24.98	7.9	10.2	6.7	7.6	7.5	94.3333	177	99	53	108	228.62	21	2	0	0	0	2	0	0	0	0	0						1	2	17.7	9.9	10.8	22.862	2.1
1524	0	38	1	3	1	1	0	2	1	1	1	0	25.56	5.5	5.8	5.8	5.8	6.1	90.6667	161	104	52	91	74.1377	31	0	0	1	0	1	0	0	0	0	0						0	2	16.1	10.4	9.1	7.41377	3.1
1525	0	36	1	3	1	0	0	0	1	#NULL!	#NULL!	0	37.01	7.6	7.3	6.4	6.1	6.4	96.3333	151	84	39	91	107.82	101	0	1	1	0	3	1	0	0	0	0						0	2	15.1	8.4	9.1	10.782	10.1
1526	1	57	0	1	0	0	0	2	1	1	1	0	27.46	6.9	7.3	7.6	7.9	7.6	93	200	113	38	136	105.06	53	0	1	1	0	2	1	0	0	0	0						1	2	20	11.3	13.6	10.506	5.3
1527	0	62	0	1	0	0	0	2	1	1	1	1	18.37	6.4	5.6	5.7	6.2	5.8	89	105	96	36	45	95.75	41	2	1	0	0	4	1	0	0	0	0						0	2	10.5	9.6	4.5	9.575	4.1
1528	0	52	1	2	0	1	0	1	1	1	0	1	22.63	7.8	6.5	6.7	7.1	6.2	68.3333	158	66	34	99	53.2179	15	0	0	0	0	1	0	0	0	0	0						0	2	15.8	6.6	9.9	5.32179	1.5
1529	0	64	0	1	1	0	0	0	1	0	1	1	26.31	7.8	6.6	6.6	6.2	6.1	107.333	168	140	49	87	44.7974	24	0	0	1	0	1	0	0	0	0	0						0	2	16.8	14	8.7	4.47974	2.4
1530	0	62	1	3	1	1	0	1	1	#NULL!	#NULL!	1	23.69	6.4	6.6	6.7	6.5	6.4	102	218	457	33	101	54.01	17	2	1	0	1	2	1	0	0	0	0						0	2	21.8	45.7	10.1	5.401	1.7
1531	0	46	1	2	1	0	0	2	1	#NULL!	#NULL!	0	26.22	7.5	5.8	6.1	5.3	5.2	92.3333	100	137	32	47	107.157	59	0	0	0	0	1	0	0	0	0	0						0	2	10	13.7	4.7	10.7157	5.9
1532	0	63	1	2	0	1	0	0	1	1	1	1	24.17	6.8	6.3	6.4	7.4	6.5	80	151	82	57	70	103.258	18	0	0	1	0	1	0	0	0	0	0						0	2	15.1	8.2	7	10.3258	1.8
1533	1	40	1	1	1	1	1	0	1	0	1	0	30.08	6.8	6.8	7.2	7.2	7.5	99.3333	168	180	40	103	65.9837	78	0	0	1	1	2	0	1	0	0	0						1	1	16.8	18	10.3	6.59837	7.8
1534	1	52	0	0	1	0	0	0	0	0	1	0	27.77	7.7	7.3	7.7	7.3	7.4	96.6667	195	100	40	136	65.7503	26	0	1	0	0	1	0	0	0	0	0						1	1	19.5	10	13.6	6.57503	2.6
1535	0	49	1	3	1	0	0	2	1	0	0	0	22.62	6.2	6.2	6.3	6.4	6.3	93	146	57	34	102	90.0638	24	0	0	0	0	1	0	0	0	0	0						0	1	14.6	5.7	10.2	9.00638	2.4
1536	0	60	1	1	1	0	0	2	1	1	1	1	24.06	6	5.6	5.8	5.7	6.4	94.3333	169	54	41	109	101.19	21	0	1	1	0	2	0	0	0	0	0						0	2	16.9	5.4	10.9	10.119	2.1
1537	0	60	0	1	0	0	0	0	1	1	1	1	29.21	6.5	5.9	7.5	7.5	6.3	102.333	150	118	60	66	88.2596	31	0	1	0	0	2	0	0	0	0	0						0	2	15	11.8	6.6	8.82596	3.1
1538	0	44	1	2	0	0	0	0	1	0	0	0	25.73	7.3	7.2	6.3	5.9	5.8	93	209	122	50	139	70.9064	15	0	1	1	0	1	0	0	0	0	0						0	1	20.9	12.2	13.9	7.09064	1.5
1539	0	59	0	2	0	0	0	0	1	1	1	1	25.92	7	6.6	6.9	7.3	6.4	95.6667	169	147	50	92	92.9769	52	0	1	1	1	3	1	0	1	0	0						0	2	16.9	14.7	9.2	9.29769	5.2
1540	0	39	0	3	1	0	0	0	1	0	1	0	21.72	6.5	6.3	6.1	6.8	6.3	93	173	83	50	105	93.1564	16	0	1	0	0	2	0	0	0	0	0						0	1	17.3	8.3	10.5	9.31564	1.6
1541	0	53	1	1	0	1	1	0	1	0	1	0	28.68	6.6	6.6	7	6.9	6.9	75.6667	155	93	54	85	78.1646	54	0	1	0	0	2	0	0	0	0	0						0	1	15.5	9.3	8.5	7.81646	5.4
1542	0	33	0	3	1	0	0	0	1	1	1	0	29.01	6	5.8	5.9	5.7	5.9	81.3333	182	412	38	74	115.132	71	0	0	0	1	3	0	0	1	0	0						0	2	18.2	41.2	7.4	11.5132	7.1
1543	0	64	0	2	1	0	0	0	1	0	1	0	26.59	6.4	6.1	6.1	6.4	6.3	85	221	109	39	73	49.8486	20	0	0	1	0	1	0	0	0	0	0						0	1	22.1	10.9	7.3	4.98486	2
1544	0	62	1	1	0	0	0	2	0	0	1	0	25.34	7.3	6.9	6.9	6.9	6.9	106.667	242	120	72	148	67.829	38	0	0	1	0	4	0	0	1	0	0						0	1	24.2	12	14.8	6.7829	3.8
1545	0	47	1	2	1	0	0	2	1	0	0	0	24.95	7.9	6.2	5.9	5.9	6.4	101	288	310	48	204	90.4495	41	0	0	1	0	1	0	0	0	0	0						0	1	28.8	31	20.4	9.04495	4.1
1546	0	63	0	1	0	0	0	1	1	1	1	0	24.32	6.7	5.6	5.6	5.6	5.5	96.3333	196	118	61	131	104.514	19	0	0	1	0	1	0	0	0	0	0						0	1	19.6	11.8	13.1	10.4514	1.9
1547	0	62	1	3	0	0	0	0	1	1	1	1	26.99	5.9	6.1	6.3	5.4	5.1	87.3333	176	174	29	115	80.33	5	0	1	1	0	4	0	0	1	0	0						0	2	17.6	17.4	11.5	8.033	0.5
1548	0	46	1	3	0	0	0	2	1	1	1	0	26.42	7	7.1	6.2	6.2	6.5	122.667	247	114	49	175	77.596	16	0	1	1	0	1	0	0	0	0	0						0	1	24.7	11.4	17.5	7.7596	1.6
1549	0	56	0	1	0	0	0	1	1	0	1	0	24.84	7.3	6.9	6.8	6.9	6.8	103.667	191	58	55	132	74.1983	17	0	0	1	0	3	0	0	1	0	0						0	1	19.1	5.8	13.2	7.41983	1.7
1550	0	52	1	2	1	0	1	1	1	1	0	1	29.16	7.7	6.5	6.7	6.6	6.7	93.6667	189	307	37	87	134.265	50	0	1	0	1	3	1	0	0	0	0						0	2	18.9	30.7	8.7	13.4265	5
1551	0	49	1	1	1	1	1	2	1	1	1	0	29.59	5.5	5.5	5.9	6.3	6.4	114.667	227	304	32	139	79.0947	42	0	1	1	0	1	0	0	0	0	0						0	1	22.7	30.4	13.9	7.90947	4.2
1552	0	49	1	3	1	1	0	0	1	1	1	1	27.36	7	5.7	5.7	6	6	87.6667	159	78	34	105	83.25	11	0	1	1	0	1	0	0	0	0	0						0	2	15.9	7.8	10.5	8.325	1.1
1553	0	36	0	3	1	0	0	0	1	1	1	1	28.81	7.6	6.7	6.8	6.7	6.6	85.6667	164	106	48	98	106.924	25	0	0	1	0	2	1	0	0	0	0						0	2	16.4	10.6	9.8	10.6924	2.5
1554	1	50	1	2	0	0	0	2	1	1	1	0	22.48	6.8	6.8	7.2	7.3	8.3	92	198	160	40	136	69.1156	14	0	0	0	0	1	0	0	0	0	0						1	1	19.8	16	13.6	6.91156	1.4
1555	0	39	0	2	0	0	0	1	1	1	1	0	31.73	5.5	5.7	5.8	5.8	5.7	113.667	166	65	55	90	103.306	20	0	1	1	0	1	0	0	0	0	0						0	2	16.6	6.5	9	10.3306	2
1556	0	63	1	1	0	0	0	2	1	1	0	0	22.07	6.4	6.4	6.4	6.2	6.8	92	201	119	74	113	67.609	20	0	0	0	0	1	0	0	0	0	0						0	1	20.1	11.9	11.3	6.7609	2
1557	1	48	1	2	1	1	0	0	0	1	1	0	24.59	6.7	7.9	8	8	7.4	126.667	125	123	37	71	104.248	68	0	1	1	0	1	0	0	0	0	0						1	2	12.5	12.3	7.1	10.4248	6.8
1558	0	44	1	2	1	0	0	0	1	1	0	1	26.13	6.3	6.3	6.1	5.8	5.7	88	171	303	38	83	79.882	23	0	0	1	0	1	0	0	0	0	0						0	2	17.1	30.3	8.3	7.9882	2.3
1559	0	63	1	2	1	0	0	1	1	1	1	1	26.67	6.6	7	6.6	6.4	6.5	98.6667	178	81	41	126	82.06	20	0	0	1	0	2	0	0	0	0	0						0	2	17.8	8.1	12.6	8.206	2
1560	0	54	1	2	1	1	0	2	1	1	1	0	21.95	7.7	5.4	5.4	5.9	5.6	95.6667	208	89	55	139	96.5486	18	0	0	1	0	1	0	1	0	0	0						0	2	20.8	8.9	13.9	9.65486	1.8
1561	0	56	1	2	0	1	0	2	1	1	1	1	22.83	7.9	6.7	6.7	6	6	84.6667	176	397	47	59	38	170	1	1	0	0	3	0	0	0	0	0						0	2	17.6	39.7	5.9	3.8	17
1562	0	52	1	2	0	0	0	2	1	1	1	1	27.49	7.8	5.4	5.8	5.5	5.3	107.667	207	101	45	132	73.3646	30	0	0	1	0	3	1	0	0	0	0						0	2	20.7	10.1	13.2	7.33646	3
1563	0	58	0	1	0	0	0	2	1	0	1	0	33.11	6.3	5.8	6.2	7.1	6.6	100.333	156	187	37	90	75.8558	44	0	0	0	0	1	0	0	0	0	0						0	1	15.6	18.7	9	7.58558	4.4
1564	1	54	1	2	1	0	0	0	1	1	1	0	35.19	6.5	7.3	7.3	7.5	7.2	98.6667	148	119	50	72	79.7053	34	0	1	1	0	2	0	1	0	0	0						1	2	14.8	11.9	7.2	7.97053	3.4
1565	0	62	1	1	0	0	0	2	1	1	1	1	32.93	7.4	6.6	6.5	6.5	6.9	97.6667	123	140	32	65	87.75	27	0	1	1	0	1	0	0	0	0	0						0	2	12.3	14	6.5	8.775	2.7
1566	0	39	1	3	1	1	0	1	1	0	0	0	24.93	6	5.8	6	6.2	6.1	106	160	117	40	91	105.54	43	0	1	0	0	2	0	0	0	0	0						0	1	16	11.7	9.1	10.554	4.3
1567	1	53	1	2	0	0	0	1	1	0	1	0	32.15	6.3	7.1	7	6.8	7.5	89.3333	137	269	36	68	71.0004	57	0	1	1	0	1	1	1	0	0	0						1	2	13.7	26.9	6.8	7.10004	5.7
1568	0	49	1	2	1	0	0	1	1	1	1	0	25.81	6.5	6.9	6	6.1	6.3	89.6667	183	128	36	118	86.7195	58	0	1	1	0	2	0	0	0	0	0						0	2	18.3	12.8	11.8	8.67195	5.8
1569	0	49	1	3	1	1	1	0	1	1	1	1	26.92	6.1	5.7	5.9	6.1	6.1	83.6667	154	364	31	53	91.6672	25	0	0	0	0	1	0	0	0	0	0						0	2	15.4	36.4	5.3	9.16672	2.5
1570	0	60	0	0	0	0	0	1	1	1	1	1	20.91	5.3	5.5	5.5	5.6	5.3	89	176	93	51	102	71.88	26	0	1	1	0	2	0	0	0	0	0						0	2	17.6	9.3	10.2	7.188	2.6
1571	0	60	0	1	0	0	0	1	1	1	1	0	23.88	5.6	5.6	5.4	5.4	5.4	98.6667	160	116	17	109	73.1664	41	2	1	0	0	1	0	0	0	0	0						0	2	16	11.6	10.9	7.31664	4.1
1572	0	47	1	2	1	0	1	0	1	1	1	0	30.65	7	6.4	6.4	6.6	6.3	88.6667	134	265	43	53	79.18	52	0	0	1	0	2	0	0	0	0	0						0	2	13.4	26.5	5.3	7.918	5.2
1573	1	45	1	2	1	1	0	0	1	1	1	0	20.09	5.5	12.5	12.9	10.4	8.5	92	134	131	35	71	151.51	28	2	1	0	0	2	0	0	0	0	0						1	2	13.4	13.1	7.1	15.151	2.8
1574	0	52	0	3	0	0	0	0	1	1	1	1	28.88	6.8	6.1	6.3	6.9	6.9	96.6667	190	131	52	105	104.98	20	0	1	1	0	4	0	1	0	0	0						0	2	19	13.1	10.5	10.498	2
1575	1	58	0	1	1	0	0	2	1	1	1	1	22.97	7.1	6.5	6.8	6.8	7.1	88.6667	186	92	62	111	91.6654	28	0	0	1	0	2	0	0	0	0	0						1	2	18.6	9.2	11.1	9.16654	2.8
1576	0	63	0	2	1	0	0	1	1	0	1	0	29.34	7.8	6.4	6.9	7.2	6.3	94.6667	215	162	40	146	71.1862	58	0	1	1	0	1	0	0	0	0	0						0	2	21.5	16.2	14.6	7.11862	5.8
1577	0	34	1	3	1	1	0	1	1	1	1	0	39.05	7.3	6.8	6.2	6.5	6.2	90.6667	187	106	35	132	142.876	53	0	0	1	0	2	0	0	0	0	0						0	2	18.7	10.6	13.2	14.2876	5.3
1578	1	52	1	2	1	0	1	2	1	1	0	1	24.56	6.4	6.4	6.7	6.7	7.1	92.6667	127	45	52	61	100.069	73	2	0	0	0	1	0	0	0	0	0						1	2	12.7	4.5	6.1	10.0069	7.3
1579	0	51	0	2	1	0	0	0	1	1	1	0	28	6.4	6.6	6.6	6.2	6.3	86	173	129	54	96	136.349	25	0	1	1	0	1	0	0	0	0	0						0	2	17.3	12.9	9.6	13.6349	2.5
1580	1	56	1	2	0	0	0	2	1	1	1	1	17.97	6.4	7.1	8.4	8.6	8.1	90.6667	155	58	64	72	114.35	14	1	0	0	0	3	0	0	0	0	0						1	2	15.5	5.8	7.2	11.435	1.4
1581	0	54	0	2	0	0	0	0	1	1	1	1	25.59	5.6	5.8	5.7	5.7	5.9	99.6667	159	171	46	84	79.3062	11	0	1	0	0	2	0	0	1	0	0						0	2	15.9	17.1	8.4	7.93062	1.1
1582	1	31	0	3	1	0	0	1	1	1	0	1	26.34	5.6	8.5	8.5	8.3	8.8	90	184	46	55	115	90.13	15	1	0	0	0	1	0	0	0	0	0						1	2	18.4	4.6	11.5	9.013	1.5
1583	0	49	0	2	1	0	0	2	1	1	1	0	24.88	5.9	5.8	5.8	5.8	5.6	92.6667	218	132	49	131	144.61	28	0	0	0	0	2	0	0	0	0	0						0	2	21.8	13.2	13.1	14.461	2.8
1584	0	60	1	2	0	0	0	0	1	1	1	1	29.53	7.6	6.1	6.6	6.7	6.9	100.333	241	216	50	132	61.7587	58	0	0	1	0	3	0	0	0	0	0						0	2	24.1	21.6	13.2	6.17587	5.8
1585	0	37	0	3	1	0	0	0	1	1	1	0	26.56	6.7	5.4	6.1	6	6.5	84	156	62	35	106	142.105	18	0	0	0	0	1	0	0	0	0	0						0	2	15.6	6.2	10.6	14.2105	1.8
1586	1	47	1	2	0	1	0	0	1	1	1	0	26.77	7.5	6.8	6.9	7.9	7.4	85.6667	194	141	34	140	122.905	22	0	0	0	1	1	0	0	0	0	0						1	2	19.4	14.1	14	12.2905	2.2
1587	1	52	0	2	0	0	0	0	1	1	1	0	30.57	7.6	7.1	7.4	7	7.7	101.333	151	74	50	88	123.35	25	0	1	1	0	1	0	0	0	0	0						1	2	15.1	7.4	8.8	12.335	2.5
1588	0	49	1	2	1	1	0	0	1	1	0	0	22.49	7.5	7	6.8	6.8	6.9	96	161	121	32	103	117.434	38	0	0	1	0	1	0	0	0	0	0						0	2	16.1	12.1	10.3	11.7434	3.8
1589	0	56	1	3	0	1	0	2	1	1	1	1	30.14	7	6.3	5.8	6.1	5.9	80	143	68	44	82	107.73	33	0	1	1	0	1	0	0	0	0	0						0	2	14.3	6.8	8.2	10.773	3.3
1590	0	37	1	2	1	1	0	0	1	1	1	0	33.21	6.5	5.6	5.6	5.6	5.5	105	226	175	31	155	127.495	47	0	0	1	0	2	0	0	0	0	0						0	2	22.6	17.5	15.5	12.7495	4.7
1591	1	39	1	2	1	0	0	0	1	1	1	1	32.6	7.6	6.6	6.5	6.1	7.1	114.667	182	209	47	103	147.157	22	2	1	1	0	2	1	0	0	0	0						1	2	18.2	20.9	10.3	14.7157	2.2
1592	0	38	1	2	0	0	0	#NULL!	0	#NULL!	#NULL!	1	26.3	5.9	6.2	6.2	5.8	5.5	125.667	280	462	34	129	68.7227	16	0	1	1	0	1	1	0	0	0	0						0	2	28	46.2	12.9	6.87227	1.6
1593	0	55	1	2	1	0	0	2	1	1	1	1	23.81	6.7	6.1	6	6	6.1	85	124	83	40	70	101.832	17	0	0	0	0	2	1	0	0	0	0						0	2	12.4	8.3	7	10.1832	1.7
1594	0	47	0	2	0	0	0	0	1	0	1	0	23.44	7.1	6.4	6.5	6.8	6.6	96.3333	189	56	73	110	107.157	9	0	0	0	0	1	0	0	0	0	0						0	1	18.9	5.6	11	10.7157	0.9
1595	0	39	1	2	0	1	0	1	1	1	0	0	26.87	5.1	5.1	5.4	5	5	124	199	188	75	119	56.4183	21	2	1	0	1	1	0	0	0	1	0						0	1	19.9	18.8	11.9	5.64183	2.1
1596	0	52	1	2	0	0	0	0	1	0	1	0	24.14	5.8	5.9	6	6	5.6	75.6667	178	111	55	107	88.6122	22	0	0	0	0	1	0	0	0	0	0						0	1	17.8	11.1	10.7	8.86122	2.2
1597	0	41	1	2	1	1	0	0	1	0	1	0	25.84	7.5	6.6	5.7	6	6.2	125.667	171	124	72	78	34.8079	36	0	1	0	0	2	0	0	0	1	0						0	1	17.1	12.4	7.8	3.48079	3.6
1598	0	57	1	1	1	0	0	2	1	1	1	0	24.02	6.1	6.2	6.3	6	6	94.6667	138	46	60	72	99.2879	17	0	0	0	0	1	0	0	0	0	0						0	1	13.8	4.6	7.2	9.92879	1.7
1599	0	56	1	1	0	1	1	2	1	0	0	0	24.37	7.8	6.6	6.4	6.2	6.3	95.6667	204	144	32	148	93.7758	11	0	1	1	0	2	0	0	0	0	0						0	1	20.4	14.4	14.8	9.37758	1.1
1600	0	34	1	3	0	0	0	0	1	0	0	1	28.13	5.8	5.8	6.1	5.5	6.3	102	167	121	55	82	75.8307	41	0	0	0	0	1	0	0	0	0	0						0	1	16.7	12.1	8.2	7.58307	4.1
1601	1	50	0	2	1	1	0	0	1	1	1	0	21.32	7.2	7.1	7.7	7.4	7.3	70	157	48	61	83	119.5	14	0	0	0	0	1	0	0	0	0	0						1	2	15.7	4.8	8.3	11.95	1.4
1602	0	60	1	1	1	0	1	2	1	1	1	0	25.92	6.9	7.2	7.8	6	6	103.667	154	77	44	87	89.2095	19	0	0	1	0	2	0	0	0	0	0						0	1	15.4	7.7	8.7	8.92095	1.9
1603	1	48	1	2	1	1	0	2	1	1	1	1	30.46	7.4	7.6	8	8	7.9	120.667	183	135	43	107	77.6254	20	0	1	0	1	1	0	0	0	0	0						1	2	18.3	13.5	10.7	7.76254	2
1604	0	40	1	2	1	1	0	0	1	0	1	0	28.34	6.5	6.1	6.2	6.3	6.2	90.3333	177	314	36	94	79.8003	67	0	0	0	1	1	0	0	0	0	0						0	1	17.7	31.4	9.4	7.98003	6.7
1605	1	51	1	1	0	0	1	0	1	1	1	0	26.38	7	6.8	6.9	8	7.3	108.333	157	124	42	97	101.914	26	0	1	1	0	1	0	0	0	0	0						1	1	15.7	12.4	9.7	10.1914	2.6
1606	0	39	1	2	1	1	1	0	1	1	1	1	28.15	6.7	6.3	5.9	6.1	6.3	110.667	206	187	42	129	76.1169	28	0	1	1	0	1	0	0	0	0	0						0	2	20.6	18.7	12.9	7.61169	2.8
1607	0	62	1	2	0	0	0	0	1	1	1	1	30.89	5.8	5.8	5.9	5.6	5.8	111	157	63	53	91	85.2268	16	0	1	0	0	2	0	0	0	0	0						0	1	15.7	6.3	9.1	8.52268	1.6
1608	1	49	1	3	1	0	0	1	1	1	0	1	29.66	7.3	6.2	6.4	6.2	7.1	101	143	303	29	68	47.19	35	0	1	1	0	1	0	0	0	0	0						1	2	14.3	30.3	6.8	4.719	3.5
1609	0	36	1	2	1	0	0	2	1	1	1	0	24.57	5.6	5.8	6	6	6.2	103.667	191	136	57	120	95.4801	23	0	1	0	1	1	0	0	0	0	0						0	1	19.1	13.6	12	9.54801	2.3
1610	0	41	0	2	0	0	0	1	1	1	0	0	22.29	5.1	6.1	5.8	5.7	5.7	92.6667	139	104	53	68	91.7655	14	0	0	0	0	3	0	0	0	0	0						0	1	13.9	10.4	6.8	9.17655	1.4
1611	0	58	1	1	0	0	0	2	1	1	1	0	24.38	6.8	7.5	6.3	5.8	6.5	94.6667	236	191	42	173	72.5454	24	0	0	1	0	1	0	0	0	0	0						0	1	23.6	19.1	17.3	7.25454	2.4
1612	0	37	1	2	1	1	0	0	1	1	1	0	31.54	5.8	6.5	6.1	5.9	6.5	103	187	148	41	107	86.4106	21	2	1	1	0	1	0	0	0	0	0						0	2	18.7	14.8	10.7	8.64106	2.1
1613	0	40	0	2	0	0	0	#NULL!	0	#NULL!	#NULL!	1	22.22	7.8	7.7	7.7	7.1	6.5	92.3333	211	145	50	137	135.968	44	2	0	1	1	3	0	0	0	0	0						0	2	21.1	14.5	13.7	13.5968	4.4
1614	1	54	0	2	1	0	0	2	1	1	1	0	31.83	7.9	7.7	8	8.2	8.1	118.333	161	76	75	74	141.03	68	0	0	1	0	4	0	0	0	1	0						1	2	16.1	7.6	7.4	14.103	6.8
1615	1	64	1	1	0	0	0	1	1	1	1	0	24.6	7.4	7.6	7.4	8.1	9.9	99	146	33	53	93	59.0563	11	0	1	0	0	3	0	0	0	0	0						1	1	14.6	3.3	9.3	5.90563	1.1
1616	1	43	0	3	1	0	0	1	1	1	1	1	29	6	6	6.5	8	7.4	101	165	61	117	21	102.655	22	0	0	0	0	1	0	0	0	0	0						1	2	16.5	6.1	2.1	10.2655	2.2
1617	0	46	1	2	0	0	1	1	1	1	1	0	25.28	7.2	6.2	6.2	6.4	5.7	85	156	130	41	98	117.527	15	0	0	0	1	1	0	0	0	0	0						0	1	15.6	13	9.8	11.7527	1.5
1618	0	46	1	2	0	1	0	0	1	1	1	0	29.67	5.9	6	6	5.7	6.2	117	164	141	33	98	100.707	16	2	0	0	0	1	0	1	0	0	0						0	1	16.4	14.1	9.8	10.0707	1.6
1619	0	61	1	2	0	0	0	2	1	1	0	0	27.07	6.1	5.5	5.6	5.8	5.8	73	82	60	30	37	98.2766	27	0	1	1	0	1	1	0	0	0	0						0	2	8.2	6	3.7	9.82766	2.7
1620	0	51	0	2	1	0	0	0	1	1	1	1	23.32	6.1	6.1	6.6	6.3	6.3	102.333	136	160	34	78	71.1992	19	0	1	0	0	4	1	0	1	0	0						0	2	13.6	16	7.8	7.11992	1.9
1621	0	39	1	3	0	0	0	2	1	0	0	0	23.11	6.5	5.8	5.8	5.9	5.9	92	115	70	38	57	110.809	18	0	0	1	0	1	0	0	0	0	0						0	2	11.5	7	5.7	11.0809	1.8
1622	0	60	1	1	0	0	0	2	1	1	1	1	28.89	5.8	5.7	5.7	6.1	6.1	93.3333	181	86	44	121	64.65	23	0	1	1	0	3	0	0	0	0	0						0	2	18.1	8.6	12.1	6.465	2.3
1623	1	54	1	2	0	0	0	2	1	1	1	0	20.4	6.9	6.9	7	8	7.7	92.3333	208	261	40	111	64.96	47	0	1	1	1	1	0	0	0	0	0						1	2	20.8	26.1	11.1	6.496	4.7
1624	1	50	1	3	1	1	1	1	1	1	1	1	29.69	7	7.3	6.8	7.3	7.6	88	152	157	40	88	100.46	28	0	1	1	0	1	0	0	0	0	0						1	2	15.2	15.7	8.8	10.046	2.8
1625	0	60	0	2	0	0	0	2	1	1	1	0	25.46	7.6	7.1	6.8	6.6	6.7	92	147	126	42	72	94.3384	17	0	0	1	0	1	0	0	0	0	0						0	2	14.7	12.6	7.2	9.43384	1.7
1626	0	64	1	1	1	1	0	0	1	1	1	0	26.23	5.8	6.1	5.7	5.6	5.9	86.6667	149	197	29	72	61.95	32	0	1	1	0	3	0	0	0	0	0						0	2	14.9	19.7	7.2	6.195	3.2
1627	0	55	0	0	0	0	0	0	1	1	1	0	27.91	7.6	6.7	7	6.9	6.7	101.333	221	136	64	141	125.2	24	0	1	1	0	2	0	0	1	0	0						0	2	22.1	13.6	14.1	12.52	2.4
1628	0	57	0	1	0	0	0	2	1	1	1	0	22.82	6.9	6.6	6.6	6.5	6.6	96.3333	159	104	62	82	95.3091	13	0	1	1	0	1	0	0	0	0	0						0	2	15.9	10.4	8.2	9.53091	1.3
1629	1	50	1	2	1	1	0	0	1	1	1	0	19.52	7.4	6.5	6.5	7.2	7.6	81.6667	157	60	39	99	117.434	12	0	0	0	0	1	0	0	0	0	0						1	2	15.7	6	9.9	11.7434	1.2
1630	0	47	1	3	0	0	0	0	1	1	1	1	27.85	5.3	5.1	5.6	5.3	5.6	88.3333	136	83	32	93	84.6161	21	0	1	0	0	4	0	0	1	0	0						0	2	13.6	8.3	9.3	8.46161	2.1
1631	0	45	0	2	1	0	0	0	1	1	1	1	38.17	6.6	5.8	6.5	6.2	6.3	87.3333	202	126	54	133	95.18	146	0	0	1	0	1	0	0	0	0	0						0	2	20.2	12.6	13.3	9.518	14.6
1632	0	49	0	2	1	0	0	0	1	1	0	1	22.6	5.9	5.6	6	5.6	5.7	75	149	88	49	84	110.49	17	0	0	1	0	2	0	0	0	0	0						0	2	14.9	8.8	8.4	11.049	1.7
1633	1	58	1	1	1	0	0	1	1	0	1	1	35.97	7.8	8.2	9.1	8	8	103.667	155	174	30	95	109.97	62	1	1	1	0	1	1	1	0	0	0						1	2	15.5	17.4	9.5	10.997	6.2
1634	0	55	1	2	1	1	0	0	1	1	1	0	23.15	7.7	5.8	5.8	5.8	5.5	110.667	123	162	45	56	68.7768	41	0	1	1	0	2	0	0	0	0	0						0	2	12.3	16.2	5.6	6.87768	4.1
1635	0	43	1	3	1	1	0	0	1	1	1	0	26.82	7.8	6	6	6.1	5.9	130.667	185	279	39	95	101.458	20	0	0	0	1	1	0	0	0	0	0						0	2	18.5	27.9	9.5	10.1458	2
1636	0	56	1	2	0	0	0	0	1	1	1	0	33.17	6.3	6	5.8	6	6.2	101.333	187	149	33	126	83.0169	29	0	1	1	0	1	0	0	0	0	0						0	2	18.7	14.9	12.6	8.30169	2.9
1637	1	56	1	2	0	0	0	1	1	1	1	0	27.71	6.5	6.5	8.4	8.4	7.5	80	178	195	36	112	61.81	35	0	1	1	0	3	0	0	1	0	0						1	2	17.8	19.5	11.2	6.181	3.5
1638	0	40	1	3	0	0	0	0	1	1	1	0	29.9	7.5	6	5.5	5.6	5.7	96.6667	192	129	39	134	89.9892	40	0	0	0	0	2	0	0	0	0	0						0	2	19.2	12.9	13.4	8.99892	4
1639	0	54	1	1	1	0	1	0	1	0	1	0	26.03	6	5.6	5.1	5.9	5.4	101	147	198	45	65	97.9086	28	0	1	0	0	3	0	0	0	0	0						0	2	14.7	19.8	6.5	9.79086	2.8
1640	0	60	1	1	0	0	1	0	1	1	0	1	22.97	6	6.5	6.6	5.8	6.5	90.6667	124	74	36	65	109.23	10	0	1	0	0	3	0	0	0	0	0						0	2	12.4	7.4	6.5	10.923	1
1641	0	44	1	2	1	0	1	2	1	1	1	1	28.83	6.5	6.7	7	7.2	6.8	110.333	170	159	44	113	100.647	55	0	0	1	0	1	0	0	0	0	0						0	2	17	15.9	11.3	10.0647	5.5
1642	0	49	1	3	0	0	0	2	1	1	1	1	29.9	5.6	5.6	5.7	5.8	5.7	81.6667	130	64	38	76	123.94	15	0	1	1	0	2	1	0	0	0	0						0	2	13	6.4	7.6	12.394	1.5
1643	0	44	0	2	0	0	0	0	1	1	1	0	35.88	6.2	6.3	6.3	6	6	93.3333	173	117	36	126	128.1	20	0	1	1	0	1	0	0	0	0	0						0	2	17.3	11.7	12.6	12.81	2
1644	0	53	1	3	1	0	0	1	1	1	0	0	29.42	6.4	5.9	6.2	6.1	6.1	116.667	204	224	30	134	81.93	19	0	1	0	0	1	0	0	0	0	0						0	2	20.4	22.4	13.4	8.193	1.9
1645	0	43	1	3	1	0	0	1	1	1	1	0	25.15	6.5	5.9	5.9	6.3	5.9	120.667	158	206	37	81	99.2656	59	0	1	0	0	1	0	0	0	0	0						0	2	15.8	20.6	8.1	9.92656	5.9
1646	0	41	1	3	1	0	0	0	1	1	1	0	24.45	5	4.8	5.2	5.3	6.1	113.333	163	100	45	94	81.94	21	0	0	0	0	3	0	0	0	1	0						0	2	16.3	10	9.4	8.194	2.1
1647	0	59	0	0	1	0	0	1	1	1	1	0	27.08	7.6	6.8	6.3	6.1	5.6	99.6667	121	84	34	71	112.745	49	0	1	1	0	2	1	1	0	0	0						0	2	12.1	8.4	7.1	11.2745	4.9
1648	1	36	1	2	0	0	0	0	1	0	1	1	38.92	7.8	7.4	12.7	12.7	12.4	85	140	154	34	84	104.832	96	0	1	1	0	4	1	0	0	0	0						1	2	14	15.4	8.4	10.4832	9.6
1649	0	62	0	1	1	0	0	2	1	1	1	0	27.91	7.8	6.5	7	6.4	6.4	97	165	104	40	102	104.852	15	0	0	0	0	1	0	0	0	0	0						0	2	16.5	10.4	10.2	10.4852	1.5
1650	1	48	0	2	0	0	0	0	1	1	1	0	29.98	7.2	7.4	6.8	7.1	8.3	108.333	181	114	54	108	82.13	22	0	0	1	0	1	0	0	0	0	0						1	2	18.1	11.4	10.8	8.213	2.2
1651	0	57	1	2	0	0	0	1	1	1	1	1	28.36	7.9	6	6.1	6.2	5.8	93	156	122	50	84	79.77	30	0	1	1	0	1	0	0	0	0	0						0	2	15.6	12.2	8.4	7.977	3
1652	1	58	1	2	0	0	0	2	1	#NULL!	#NULL!	1	26.11	6.3	6.1	6.5	6.6	7.1	79.3333	148	106	31	93	61.3791	19	0	1	1	0	4	1	0	0	1	0						1	2	14.8	10.6	9.3	6.13791	1.9
1653	0	41	0	2	1	0	0	1	1	1	1	0	24.28	7.4	7.1	6.8	7	6.4	83	139	257	36	62	126.505	52	0	0	0	0	1	0	0	0	0	0						0	2	13.9	25.7	6.2	12.6505	5.2
1654	0	50	1	2	1	0	0	1	1	#NULL!	#NULL!	1	25.49	7.5	6.7	4.7	4.8	4.5	94	112	85	37	54	154.432	31	0	0	1	0	3	1	0	0	0	0						0	2	11.2	8.5	5.4	15.4432	3.1
1655	0	63	1	2	0	0	0	0	1	1	1	1	24.55	7.6	6.1	6.2	6.2	6.9	94	197	42	43	132	95.9383	15	0	1	1	0	2	1	0	0	0	0						0	2	19.7	4.2	13.2	9.59383	1.5
1656	0	57	0	2	1	0	0	1	1	1	0	0	24.08	6	5.9	6	6.1	6	93	236	102	61	147	103.042	29	0	1	1	0	1	0	0	0	0	0						0	2	23.6	10.2	14.7	10.3042	2.9
1657	0	49	1	2	0	1	1	0	1	1	0	0	21.18	6.8	5.9	5.9	5.6	6.1	89.6667	135	89	41	72	68.2747	16	0	0	0	0	4	1	0	0	0	0						0	2	13.5	8.9	7.2	6.82747	1.6
1658	0	56	0	3	1	0	0	0	1	#NULL!	#NULL!	0	29.53	6.6	6.4	6	6.1	6	80.3333	114	63	44	60	82.468	29	0	0	0	0	1	0	0	0	0	0						0	2	11.4	6.3	6	8.2468	2.9
1659	1	58	1	2	0	1	0	0	1	1	1	1	28.93	7.7	7.1	7.1	7.3	7.4	87.6667	230	255	30	137	64.6662	16	0	1	0	0	4	1	0	1	0	0						1	2	23	25.5	13.7	6.46662	1.6
1660	0	49	0	2	0	0	0	1	1	0	0	0	19.43	5.2	5.6	6.2	5.9	6.1	84.6667	175	39	72	100	197.644	16	0	0	1	0	1	0	0	0	0	0						0	1	17.5	3.9	10	19.7644	1.6
1661	0	38	0	3	1	0	0	0	1	#NULL!	#NULL!	0	25.73	6.5	6.1	6.1	6.3	6.3	88.6667	170	146	30	112	111.882	16	0	0	1	0	3	0	0	0	0	0						0	2	17	14.6	11.2	11.1882	1.6
1662	0	63	1	2	1	0	0	2	1	1	1	1	21.76	6.4	6.5	6.4	6.7	6.6	87.3333	136	73	41	79	81.0555	18	0	0	0	0	1	0	0	0	0	0						0	2	13.6	7.3	7.9	8.10555	1.8
1663	0	53	0	2	1	0	0	0	1	1	1	0	21.65	6.7	6.8	6.6	6.4	6.9	96	149	65	46	90	128.225	18	0	0	1	0	2	0	0	0	0	0						0	2	14.9	6.5	9	12.8225	1.8
1664	0	54	1	1	0	0	0	2	1	1	1	1	24.14	7.3	6.6	6.6	6.4	6.5	92.6667	167	45	55	109	87.9359	25	0	0	0	0	1	0	0	0	0	0						0	1	16.7	4.5	10.9	8.79359	2.5
1665	1	49	0	1	1	0	0	1	1	1	1	1	25.31	7.3	6.2	7.1	7.3	7.7	106.667	181	159	37	119	91.9638	30	0	1	1	0	3	0	0	0	0	0						1	2	18.1	15.9	11.9	9.19638	3
1666	0	54	1	3	1	0	0	2	1	0	1	0	25.73	6.4	6.4	6.3	5.7	6.2	118	166	111	37	109	90.2462	17	0	1	0	0	1	0	0	0	0	0						0	2	16.6	11.1	10.9	9.02462	1.7
1667	0	49	1	1	0	0	0	2	1	1	1	0	29.37	7.3	5.7	6.1	6.1	5.9	85	172	156	33	108	139.919	33	0	1	1	0	2	0	0	0	0	0						0	2	17.2	15.6	10.8	13.9919	3.3
1668	0	51	1	1	1	1	1	0	1	0	1	0	20.83	6.1	5.6	5.1	5.1	5.2	90	154	378	17	74	102.325	26	0	1	0	1	1	0	1	0	0	0						0	1	15.4	37.8	7.4	10.2325	2.6
1669	1	43	1	1	1	1	0	0	1	0	0	0	28.95	7.5	6.1	7.3	7.3	7.3	111.333	186	278	47	102	92.0976	37	0	1	0	1	1	0	0	0	0	0						1	1	18.6	27.8	10.2	9.20976	3.7
1670	0	46	1	2	0	1	0	0	1	1	1	0	28.82	4.8	5	4.6	4.5	4.5	116.667	200	77	62	111	47.0358	24	0	1	0	0	3	0	0	0	0	0						0	2	20	7.7	11.1	4.70358	2.4
1671	0	48	0	2	0	0	0	2	1	0	1	0	22.17	6.2	6	5.6	5.7	5.5	81.6667	148	43	61	79	110.404	47	0	0	0	0	1	0	0	0	0	0						0	1	14.8	4.3	7.9	11.0404	4.7
1672	0	40	0	3	1	0	0	0	1	1	1	0	32.72	7.1	7.1	7.4	7.2	6.6	110.333	233	198	44	138	192.061	54	0	1	1	0	1	0	0	0	0	0						0	1	23.3	19.8	13.8	19.2061	5.4
1673	0	61	1	2	0	0	0	2	1	1	1	0	23.01	6.2	6.8	5.8	6	5.9	93.3333	159	128	31	95	62.55	27	0	0	0	0	1	0	0	0	0	0						0	2	15.9	12.8	9.5	6.255	2.7
1674	0	54	0	2	1	0	0	2	1	1	1	1	27.77	6.2	6	6.6	6.1	6.2	101.667	133	186	39	60	144.429	24	1	1	1	1	3	0	0	0	0	0						0	2	13.3	18.6	6	14.4429	2.4
1675	0	46	0	1	0	0	0	0	1	0	1	0	28.76	6.5	5.8	5.8	5.8	5.8	95.3333	202	204	45	124	129.784	45	0	0	1	0	2	0	0	0	0	0						0	1	20.2	20.4	12.4	12.9784	4.5
1676	0	61	0	0	1	0	0	0	1	1	0	1	25.28	6.4	5.6	5.9	5.9	6.2	84	245	248	39	143	47.49	11	0	0	1	0	3	0	0	0	0	0						0	2	24.5	24.8	14.3	4.749	1.1
1677	0	41	0	2	1	0	0	2	1	1	1	1	31.61	6.6	6.1	6.4	6.5	6.6	103	174	71	45	110	139.682	44	0	0	1	1	2	0	1	0	0	0						0	2	17.4	7.1	11	13.9682	4.4
1678	0	55	1	2	1	0	0	2	1	1	1	0	33.85	6.2	5.9	5.9	5.9	6	98	196	93	50	119	117.085	25	0	0	1	0	1	0	0	0	0	0						0	2	19.6	9.3	11.9	11.7085	2.5
1679	0	52	1	2	1	0	0	0	1	1	1	1	27.26	7.2	6	6.1	7.3	5.9	89.3333	167	40	44	108	121.98	24	0	1	1	0	3	0	1	0	0	0						0	2	16.7	4	10.8	12.198	2.4
1680	1	41	1	3	1	0	0	0	1	1	1	1	22.83	6.9	7	7	7.1	8.5	86.3333	228	51	76	151	147.752	14	2	0	1	0	1	0	0	0	0	0						1	1	22.8	5.1	15.1	14.7752	1.4
1681	1	52	0	2	1	0	0	2	1	1	1	1	24.86	7.3	8.5	8.1	7.2	7.1	85.6667	142	145	41	80	210.325	111	0	0	1	0	2	0	0	0	1	0						1	2	14.2	14.5	8	21.0325	11.1
1682	0	64	1	1	1	1	0	2	1	1	1	0	29.96	7.5	11.8	6.7	6.7	6.2	94	273	245	55	191	51.0782	22	0	1	1	0	1	1	0	0	0	0						0	1	27.3	24.5	19.1	5.10782	2.2
1683	0	46	0	2	1	0	0	0	1	1	1	0	23.4	6.6	6.5	6.5	6.2	6.5	92	187	92	51	121	59.43	11	0	1	0	0	1	0	0	0	0	0						0	1	18.7	9.2	12.1	5.943	1.1
1684	0	45	0	2	1	0	0	2	1	0	1	0	26.25	7.4	6.9	6.6	6.6	6.8	101.333	173	121	46	118	116.54	21	0	0	0	0	1	0	0	0	0	0						0	1	17.3	12.1	11.8	11.654	2.1
1685	1	52	0	2	0	0	0	2	1	#NULL!	#NULL!	0	33.93	7.6	6.8	6.8	7	8.1	108	138	154	39	81	43.0133	32	0	1	0	0	1	0	0	0	0	0						1	1	13.8	15.4	8.1	4.30133	3.2
1686	1	49	0	1	1	0	0	1	0	1	1	0	31.02	6.9	7.5	7.6	7.2	8	97.6667	168	159	47	94	127.648	33	0	1	1	0	1	0	0	0	0	0						1	2	16.8	15.9	9.4	12.7648	3.3
1687	0	39	1	2	1	1	0	0	1	1	1	0	21.25	6.7	5.4	5.4	4.8	5.1	81.3333	191	89	62	124	112.169	62	0	0	0	0	1	0	0	0	0	0						0	1	19.1	8.9	12.4	11.2169	6.2
1688	0	45	1	2	1	0	1	0	1	1	1	0	29.41	6.6	6.8	6.9	7	6.7	101.333	164	104	57	87	94.89	46	0	1	1	0	1	0	0	0	0	0						0	2	16.4	10.4	8.7	9.489	4.6
1689	1	35	1	2	1	1	0	0	1	1	1	0	40.55	7	7	7	7.1	7.1	112.333	176	48	42	115	117.923	50	0	1	0	0	1	0	0	0	0	0						1	1	17.6	4.8	11.5	11.7923	5
1690	0	59	1	1	0	1	0	0	1	1	1	0	25.93	5.8	6	5.5	5.8	5.8	91.3333	156	123	31	109	84.2062	17	2	0	0	0	2	0	0	0	0	0						0	1	15.6	12.3	10.9	8.42062	1.7
1691	1	52	1	2	1	0	0	1	1	1	1	0	27.64	6.7	5.8	6.1	6	8.6	91	176	128	36	118	88.61	89	0	1	1	0	2	0	0	1	0	0						1	2	17.6	12.8	11.8	8.861	8.9
1692	0	45	1	2	1	0	0	2	1	#NULL!	#NULL!	1	25.4	4.9	5.9	5.3	5.5	5.4	88.3333	125	50	44	67	88.9661	19	2	0	1	0	2	0	0	0	0	0						0	2	12.5	5	6.7	8.89661	1.9
1693	0	62	0	0	1	0	0	1	1	0	1	0	24.15	6.9	7.3	6.4	6.9	6.5	81.3333	202	90	44	146	109.337	29	0	0	1	0	4	0	0	0	0	0						0	1	20.2	9	14.6	10.9337	2.9
1694	0	53	1	3	0	0	0	2	1	1	1	0	27.4	6.6	6.1	6.1	5.9	6.4	112.667	201	126	71	110	98.5618	46	0	0	1	0	2	0	0	0	0	0						0	2	20.1	12.6	11	9.85618	4.6
1695	0	52	1	3	1	0	0	0	1	1	1	0	28.52	6.8	6.4	6.4	6.5	6.8	105	152	116	51	79	95.1821	40	0	1	1	0	1	0	0	0	0	0						0	2	15.2	11.6	7.9	9.51821	4
1696	0	61	1	1	0	0	0	2	1	1	1	1	35.94	6.3	5.9	5.9	6.3	6.2	104.333	115	51	43	56	139.65	17	0	0	1	0	1	0	0	0	0	0						0	2	11.5	5.1	5.6	13.965	1.7
1697	0	62	0	1	0	0	0	2	1	0	1	0	25.06	7.5	7.5	6.7	6.9	6.9	91	282	63	53	221	105.339	66	0	1	1	0	1	0	0	0	0	0						0	2	28.2	6.3	22.1	10.5339	6.6
1698	0	64	0	1	1	0	0	2	1	1	1	0	25.45	7.9	7.1	7.5	7.5	6.9	80.6667	138	61	71	53	151.42	34	0	1	1	0	1	0	0	0	0	0						0	2	13.8	6.1	5.3	15.142	3.4
1699	0	51	1	3	0	0	0	1	1	1	1	0	30.3	6.3	6.2	6.2	6	6	93	198	125	46	132	76.0083	21	0	1	1	1	1	0	0	0	0	0						0	2	19.8	12.5	13.2	7.60083	2.1
1700	0	39	1	3	1	0	0	0	1	1	1	0	30.26	6.5	6.3	6.6	6.5	6.4	98	138	346	39	57	93.94	58	0	0	1	1	1	0	0	0	0	0						0	2	13.8	34.6	5.7	9.394	5.8
1701	0	57	1	3	0	0	0	1	1	#NULL!	#NULL!	0	29.9	7.6	6	6	6	5.8	87.6667	163	156	34	102	73.61	29	0	1	1	0	2	1	0	0	0	0						0	2	16.3	15.6	10.2	7.361	2.9
1702	1	45	1	2	1	1	0	0	1	1	1	0	27.45	7.8	13.6	5.9	7.1	8.8	88.6667	201	113	34	131	101.6	28	1	1	1	0	4	0	0	0	0	0						1	2	20.1	11.3	13.1	10.16	2.8
1703	0	36	1	3	0	1	0	0	1	1	1	0	29.86	6.6	6.1	6.1	6.1	6.3	104.333	168	108	43	110	90.807	70	0	0	1	0	1	0	0	0	0	0						0	2	16.8	10.8	11	9.0807	7
1704	1	53	1	2	0	1	0	2	1	#NULL!	#NULL!	1	23.29	6.2	6.4	6.4	7.2	7.2	113	137	165	26	85	59.2614	24	0	0	0	1	1	0	0	0	0	0						1	2	13.7	16.5	8.5	5.92614	2.4
1705	1	42	1	3	1	0	0	0	1	#NULL!	#NULL!	0	30.42	7.5	7.4	7.1	6.9	7.4	89.6667	149	141	43	74	79.71	18	0	0	1	0	1	0	0	0	0	0						1	2	14.9	14.1	7.4	7.971	1.8
1706	0	50	1	2	0	1	0	0	1	1	1	0	23.46	5.2	5.2	5.6	5.4	5.4	95.3333	144	177	46	55	115.55	60	0	1	0	0	2	0	0	0	0	0						0	2	14.4	17.7	5.5	11.555	6
1707	0	59	1	2	0	0	0	2	1	1	1	0	28.05	5.9	5.7	6.1	5.8	5.6	92.6667	178	53	78	81	113.55	54	0	1	0	0	4	0	0	0	0	0						0	2	17.8	5.3	8.1	11.355	5.4
1708	0	57	0	3	1	0	0	2	1	#NULL!	#NULL!	1	22.47	5.8	6	6.4	6.2	6.4	118	147	60	52	76	106.775	16	0	1	1	0	1	1	0	0	0	0						0	2	14.7	6	7.6	10.6775	1.6
1709	1	51	0	2	1	0	0	2	1	1	1	1	24.05	6.9	8.4	8.4	7.1	7.5	95.3333	152	77	29	101	92.79	44	0	0	0	0	2	0	0	0	0	0						1	2	15.2	7.7	10.1	9.279	4.4
1710	0	63	0	1	0	0	0	2	1	#NULL!	#NULL!	0	24.98	6.6	6.3	6.4	6.5	6.7	80.3333	144	103	46	74	90.4528	31	0	0	1	0	2	0	0	1	0	0						0	2	14.4	10.3	7.4	9.04528	3.1
1711	0	48	1	2	1	0	0	0	1	1	0	0	25.21	7.4	6	5.9	5.9	6.3	79.3333	157	74	42	96	67.1988	16	0	1	0	1	3	1	0	0	0	0						0	2	15.7	7.4	9.6	6.71988	1.6
1712	0	51	1	2	1	1	0	2	1	#NULL!	#NULL!	0	25.01	7.7	6.1	5.8	5.9	6.1	100.667	122	107	44	62	84.6081	39	0	1	1	0	2	1	0	0	0	0						0	2	12.2	10.7	6.2	8.46081	3.9
1713	0	49	1	2	1	0	0	2	1	#NULL!	#NULL!	1	24.82	7.5	7.8	6.9	6.7	7	104.667	149	133	42	85	123.94	15	0	0	1	0	1	0	0	0	0	0						0	2	14.9	13.3	8.5	12.394	1.5
1714	0	64	0	1	1	0	0	2	1	1	1	0	24.25	6.7	6.7	5.9	5.9	5.8	103.333	131	66	44	65	85.6556	27	0	1	1	0	1	0	0	0	0	0						0	2	13.1	6.6	6.5	8.56556	2.7
1715	1	60	0	2	0	0	0	1	1	#NULL!	#NULL!	0	25.33	7.2	7	7.5	7.5	7.5	92.3333	247	303	43	151	63.8677	87	0	1	1	1	2	0	0	0	1	0						1	1	24.7	30.3	15.1	6.38677	8.7
1716	0	62	0	1	0	0	0	0	1	0	1	0	25.66	7.2	5.6	5.4	5.4	5.4	99.3333	193	167	36	120	84.7897	141	0	0	0	0	2	0	0	0	0	0						0	1	19.3	16.7	12	8.47897	14.1
1717	1	45	1	2	1	0	0	0	1	0	1	0	46.7	7.4	6.9	7.1	7.6	7.5	111.667	109	102	38	54	86.8837	58	0	1	0	0	1	0	0	0	0	0						1	1	10.9	10.2	5.4	8.68837	5.8
1718	1	37	0	2	0	0	0	0	1	0	1	1	24.19	7	6.2	6.4	6.8	7.4	81.3333	148	49	41	84	116.354	33	0	0	0	0	1	0	0	0	0	0						1	1	14.8	4.9	8.4	11.6354	3.3
1719	1	48	0	2	1	0	0	1	1	1	1	0	20.8	7.9	7.5	7.5	7.1	7.1	85	173	87	50	96	148.09	10	0	0	0	0	1	0	0	0	0	0						1	2	17.3	8.7	9.6	14.809	1
1720	0	45	0	3	1	0	0	1	0	1	1	0	24.12	6.3	6.1	6.3	6	5.9	86.6667	224	66	55	148	130.361	21	0	0	1	0	1	0	0	0	0	0						0	1	22.4	6.6	14.8	13.0361	2.1
1721	0	57	0	1	0	0	0	0	1	1	1	0	22.58	6.3	6.5	6.7	6.5	6.4	106.333	117	131	45	49	95.3091	22	0	1	1	0	1	0	0	0	0	0						0	2	11.7	13.1	4.9	9.53091	2.2
1722	0	58	0	2	0	0	0	2	1	1	1	0	24.54	6.7	6.7	7	6.9	6.5	86	130	139	41	60	98.8658	16	0	0	1	0	1	0	0	0	0	0						0	2	13	13.9	6	9.88658	1.6
1723	0	64	1	1	0	0	0	2	1	0	0	1	23.33	5.6	5.6	6.1	7	6.9	92.6667	224	162	42	155	84.9547	56	0	0	1	0	3	0	0	0	0	0						0	1	22.4	16.2	15.5	8.49547	5.6
1724	1	44	0	3	1	0	0	0	1	#NULL!	#NULL!	1	22.61	6.5	6.9	6.8	7	7.1	108	132	56	63	58	104.09	31	0	0	1	0	1	0	0	0	0	0						1	2	13.2	5.6	5.8	10.409	3.1
1725	0	41	0	2	0	0	0	1	1	1	1	1	25.1	7.4	6.1	6	6.1	5.9	95	202	157	43	130	135.045	13	0	0	1	0	3	1	0	0	0	0						0	2	20.2	15.7	13	13.5045	1.3
1726	0	53	1	1	0	0	0	2	1	0	1	0	26.37	5.8	6.5	6.5	5.9	5.6	101.667	151	71	44	94	68.3147	34	0	1	0	0	1	0	0	0	0	0						0	1	15.1	7.1	9.4	6.83147	3.4
1727	0	56	1	1	1	1	1	1	1	1	1	0	23.09	6.6	6.6	6.8	6.8	6.8	91	238	112	33	180	131.419	12	0	0	1	0	1	0	0	0	0	0						0	2	23.8	11.2	18	13.1419	1.2
1728	0	48	0	2	1	0	0	2	1	1	1	1	24.37	7.8	5.6	5.6	5.8	6.2	111.667	174	105	45	115	58.501	24	0	0	1	0	2	0	1	0	0	0						0	1	17.4	10.5	11.5	5.8501	2.4
1729	1	44	1	2	1	0	1	0	1	1	1	1	25.78	7.5	8.1	8.4	7.7	8.7	104.333	163	136	48	98	72.7194	44	0	0	1	0	2	0	0	0	0	0						1	1	16.3	13.6	9.8	7.27194	4.4
1730	1	46	1	2	1	0	0	0	1	1	1	1	23.48	7.4	6.9	6.6	6.6	7.8	106.333	277	99	46	202	107.157	46	1	1	0	0	4	0	0	0	0	0						1	2	27.7	9.9	20.2	10.7157	4.6
1731	0	44	0	2	0	0	0	2	1	1	1	1	18.4	6.7	7.1	6.2	6.2	6.9	73.6667	162	79	63	92	130.953	73	1	0	0	0	1	0	0	0	0	0						0	1	16.2	7.9	9.2	13.0953	7.3
1732	0	41	1	2	1	0	1	2	1	1	1	1	29.66	6.4	5.9	6.1	5.9	6	107	172	182	49	102	65.6587	38	0	1	1	0	1	0	0	0	0	0						0	1	17.2	18.2	10.2	6.56587	3.8
1733	0	52	0	1	1	0	0	0	1	1	1	1	23.56	6.9	7.8	8.2	8.2	6.8	97	159	69	79	79	87.5328	24	2	0	1	0	3	0	0	0	0	0						0	1	15.9	6.9	7.9	8.75328	2.4
1734	0	54	0	2	1	0	0	1	1	1	1	1	28.19	5.4	5.5	5.6	5.6	6.2	98.3333	171	69	61	89	103.79	15	0	1	0	0	2	0	0	0	0	0						0	2	17.1	6.9	8.9	10.379	1.5
1735	0	49	1	3	1	1	0	1	1	0	1	0	29.17	6.5	6	6.2	5.9	6.6	77.3333	174	135	43	117	77.6254	7	0	0	0	0	3	0	0	0	0	0						0	1	17.4	13.5	11.7	7.76254	0.7
1736	0	50	1	2	0	0	0	2	1	1	1	0	21.5	5	5	4.8	4.8	4.9	77	152	56	37	98	83.9178	12	0	1	0	0	3	0	0	0	0	0						0	2	15.2	5.6	9.8	8.39178	1.2
1737	0	55	1	3	1	0	0	2	1	1	1	1	25.84	7.9	6.4	6.2	6.2	6.6	93.6667	165	66	39	103	84.4173	17	0	0	0	0	1	0	0	0	0	0						0	2	16.5	6.6	10.3	8.44173	1.7
1738	1	44	1	3	1	0	0	2	1	1	1	1	26.55	7	6.9	6.3	6.3	7.6	96.3333	150	258	38	80	74.7355	48	0	0	1	1	1	0	0	0	0	0						1	1	15	25.8	8	7.47355	4.8
1739	1	57	0	1	0	0	0	0	1	0	0	0	23.96	6.7	7.8	7.6	7.6	7.8	89	166	91	69	69	79.6487	26	0	0	1	0	3	0	0	0	0	0						1	2	16.6	9.1	6.9	7.96487	2.6
1740	0	36	1	2	1	1	1	0	1	1	1	1	21.6	5.7	5.1	5.1	4.9	5.5	65	293	763	46	122	122.499	58	0	1	0	1	1	0	0	0	0	0						0	2	29.3	76.3	12.2	12.2499	5.8
1741	1	54	1	2	1	1	0	2	1	1	1	0	43.54	7.2	6.9	7.1	7.2	7.1	109.333	163	220	31	101	96.5486	72	0	1	1	0	1	0	0	0	0	0						1	2	16.3	22	10.1	9.65486	7.2
1742	0	32	0	3	1	0	0	1	1	1	1	0	34.29	7.5	6.2	5.6	5.6	5.7	104.333	158	63	50	96	110.857	14	0	0	0	0	1	0	0	0	0	0						0	2	15.8	6.3	9.6	11.0857	1.4
1743	1	52	1	2	1	1	0	0	1	1	1	1	23.6	7.4	7.5	7.4	7.4	7.1	92	162	180	40	88	81.93	30	0	0	0	1	1	0	0	0	0	0						1	2	16.2	18	8.8	8.193	3
1744	0	60	1	2	0	0	0	0	1	1	1	1	25.75	7.7	5.3	5.1	5.1	5.1	77	130	62	47	63	73.66	21	0	1	1	0	1	0	0	0	0	0						0	2	13	6.2	6.3	7.366	2.1
1745	0	47	1	2	0	0	0	2	1	0	1	0	22.94	6.6	6.3	6.7	6.3	6	106	160	361	35	78	131.67	28	0	1	1	0	1	0	0	0	0	0						0	2	16	36.1	7.8	13.167	2.8
1746	0	59	1	2	0	0	0	2	1	1	1	1	24.1	5.9	6	5.8	5.9	5.8	92.6667	195	110	67	106	77.37	21	0	0	1	0	1	0	0	0	0	0						0	2	19.5	11	10.6	7.737	2.1
1747	0	35	1	3	1	0	0	0	1	1	1	1	28.04	7	7	5.7	7.2	6.4	87	116	140	35	60	144.928	20	0	1	0	0	1	0	0	0	0	0						0	2	11.6	14	6	14.4928	2
1748	0	58	1	2	1	0	0	1	1	1	1	0	29.37	5.3	5	4.6	4.9	4.9	97.3333	182	63	53	115	88.9466	90	0	1	0	0	3	0	0	0	0	0						0	2	18.2	6.3	11.5	8.89466	9
1749	1	61	0	1	1	0	0	0	1	1	1	0	23.94	7.9	7.2	7.2	7.4	8	83	199	84	55	120	99.71	39	0	0	1	0	1	0	0	0	0	0						1	2	19.9	8.4	12	9.971	3.9
1750	0	59	1	2	0	0	0	0	1	1	1	0	24.46	5.4	5.2	5.2	5.2	5.3	93	123	218	25	58	64.44	25	0	1	0	0	2	0	0	1	0	0						0	2	12.3	21.8	5.8	6.444	2.5
1751	1	55	1	3	0	0	0	1	1	0	1	0	29	6.4	6.9	7.1	7.4	7.1	80	177	275	29	121	82.514	54	0	0	0	1	1	0	0	0	0	0						1	2	17.7	27.5	12.1	8.2514	5.4
1752	0	62	0	2	1	0	0	2	1	1	0	0	27.71	6.2	6.2	6.2	6.4	6	78	177	102	55	95	131.049	50	0	0	1	0	2	0	0	0	0	0						0	2	17.7	10.2	9.5	13.1049	5
1753	0	49	1	2	1	0	0	0	1	1	1	0	25.84	7.1	6.4	10.2	8.6	6.6	87	142	129	34	84	76.44	51	0	1	1	0	1	1	1	0	0	0						0	2	14.2	12.9	8.4	7.644	5.1
1754	0	50	1	1	0	1	0	0	1	1	0	1	24.36	7	6.2	5.9	6.5	6	90.3333	224	326	31	133	84.9489	29	0	0	1	0	1	0	0	0	0	0						0	2	22.4	32.6	13.3	8.49489	2.9
1755	0	55	1	3	1	0	0	2	1	1	1	0	28.67	7.8	6	6.4	5.9	5.8	100	199	162	43	116	86.4989	34	0	0	0	0	1	0	0	0	0	0						0	2	19.9	16.2	11.6	8.64989	3.4
1756	0	53	0	3	0	0	0	2	1	1	1	1	23.83	5.9	5.9	5.8	6.1	6	91.3333	172	211	49	80	132.108	25	0	1	1	0	1	0	0	0	0	0						0	2	17.2	21.1	8	13.2108	2.5
1757	0	44	0	3	1	0	0	1	1	1	1	0	23.02	7.4	7.2	7.1	7.5	6.7	110.333	172	104	47	111	104.569	27	0	0	0	0	1	0	0	0	0	0						0	2	17.2	10.4	11.1	10.4569	2.7
1758	1	51	1	2	1	1	0	2	1	1	1	0	23.19	6	6	8.5	7	7.1	84	167	343	33	92	83.58	55	0	1	1	0	2	0	1	0	0	0						1	2	16.7	34.3	9.2	8.358	5.5
1759	0	34	1	3	0	0	0	1	1	1	1	1	31.89	6.6	5.8	5.7	5.8	5.9	90.3333	121	54	39	69	104.599	43	0	1	1	0	1	0	0	0	0	0						0	2	12.1	5.4	6.9	10.4599	4.3
1760	0	63	1	2	1	0	0	2	1	1	0	1	28.16	6.8	7.1	6.7	7	6.7	99	98	80	32	50	66.9066	26	0	1	1	0	3	0	0	1	0	0						0	2	9.8	8	5	6.69066	2.6
1761	1	32	0	3	1	0	0	0	1	1	1	1	22.46	7.6	5.9	5.5	6.2	8.3	81.6667	167	188	36	102	133.68	69	2	0	0	1	1	0	0	0	0	0						1	2	16.7	18.8	10.2	13.368	6.9
1762	0	34	1	3	1	0	1	0	1	1	1	1	28.24	5.9	6.4	6.4	6.6	6	99	118	158	38	55	117.406	33	2	0	1	0	2	0	0	0	0	0						0	2	11.8	15.8	5.5	11.7406	3.3
1763	1	49	0	2	1	0	0	0	1	1	1	0	30.64	7.5	7.1	7	6.9	7.2	98.6667	148	48	36	92	132.473	11	0	1	1	0	4	1	0	0	0	0						1	2	14.8	4.8	9.2	13.2473	1.1
1764	0	32	1	2	1	1	0	0	1	1	1	1	36.07	6.4	6.3	7.7	6.4	6.8	113	217	657	26	119	102.416	123	0	1	1	1	1	0	0	0	0	0						0	2	21.7	65.7	11.9	10.2416	12.3
1765	0	54	1	2	0	0	0	2	1	1	1	0	25.14	7.7	6.4	6.6	6.4	5.8	94.3333	177	109	53	103	108.528	27	0	0	1	0	2	0	0	0	0	0						0	2	17.7	10.9	10.3	10.8528	2.7
1766	0	43	1	3	0	0	0	0	1	1	0	1	27.11	5.1	4.4	5	5.2	5.5	120.333	191	302	39	111	62.1712	28	2	1	1	1	4	1	0	0	0	0						0	2	19.1	30.2	11.1	6.21712	2.8
1767	0	47	0	2	1	0	0	2	1	1	1	0	29.2	5.7	5.6	5.4	5.5	5.6	84.6667	279	83	64	182	148.536	14	0	0	1	0	1	0	0	0	0	0						0	2	27.9	8.3	18.2	14.8536	1.4
1768	0	58	1	2	0	0	1	#NULL!	0	#NULL!	#NULL!	0	21.75	4.9	6.1	6	6	5.2	90.3333	142	71	50	69	52.9227	30	0	1	0	0	4	0	0	0	0	0						0	2	14.2	7.1	6.9	5.29227	3
1769	1	60	1	2	0	0	0	2	1	1	1	0	29.83	6.9	6.9	6.9	7.6	7.5	99.3333	136	52	63	59	72.6	16	0	1	1	0	2	0	0	0	1	0						1	2	13.6	5.2	5.9	7.26	1.6
1770	0	44	1	1	1	0	0	0	1	0	0	0	22.21	6.3	5.9	6.2	6.2	5.6	97	204	154	44	129	47.7686	21	0	1	1	0	1	0	0	0	0	0						0	1	20.4	15.4	12.9	4.77686	2.1
1771	0	59	0	1	1	0	0	0	1	1	1	0	21.43	7.1	7.2	7.3	6.7	6.5	95.3333	178	63	52	119	123.426	15	0	0	0	0	3	0	0	0	0	0						0	1	17.8	6.3	11.9	12.3426	1.5
1772	0	49	0	1	1	0	0	0	1	1	0	0	23.85	6.6	6.8	6.9	6	6.2	86.6667	212	51	78	125	76.2371	17	0	1	1	0	1	0	0	0	0	0						0	1	21.2	5.1	12.5	7.62371	1.7
1773	0	45	1	2	1	1	0	0	1	0	1	0	27.27	5.9	6	6	6.2	7	98	190	299	31	112	121.953	8	0	0	0	1	2	0	0	0	0	0						0	1	19	29.9	11.2	12.1953	0.8
1774	0	46	0	3	0	0	0	2	1	1	1	0	25.54	7.2	7.2	5.6	5.9	5.8	112.333	160	141	35	98	96.4158	26	0	1	1	0	1	1	0	0	0	0						0	2	16	14.1	9.8	9.64158	2.6
1775	0	43	1	1	0	1	0	2	1	1	1	0	29.19	5.6	5.7	5.8	5.7	5.2	106.333	186	72	72	99	55.3111	34	2	1	0	1	1	0	0	0	0	0						0	1	18.6	7.2	9.9	5.53111	3.4
1776	1	59	0	1	1	0	0	1	1	1	1	0	31.34	7.5	7.4	7.3	7.4	7.4	109.667	133	116	37	77	154.429	18	0	1	1	0	4	0	0	1	0	0						1	2	13.3	11.6	7.7	15.4429	1.8
1777	0	33	1	3	1	1	0	0	1	1	1	0	40.84	6.7	7.3	7.5	7.5	6.8	101.667	249	137	53	183	121.81	83	0	1	1	0	2	0	0	0	0	0						0	1	24.9	13.7	18.3	12.181	8.3
1778	0	63	0	2	0	0	0	2	1	1	1	1	25.03	6.8	6.5	6.4	6.5	6.3	91	175	55	51	94	87.3898	16	0	0	0	0	1	0	0	0	0	0						0	2	17.5	5.5	9.4	8.73898	1.6
1779	1	60	1	2	0	1	1	0	1	1	1	1	25.53	7.3	7.9	7.7	7.6	7.7	106.333	158	76	56	79	59.4655	12	0	1	1	0	3	0	0	0	0	0						1	2	15.8	7.6	7.9	5.94655	1.2
1780	0	58	1	1	0	1	0	0	1	1	0	0	22.77	7	6.3	6	6.9	6	81.6667	192	119	55	126	82.5712	28	0	0	0	0	1	0	0	0	0	0						0	1	19.2	11.9	12.6	8.25712	2.8
1781	1	45	1	2	1	0	0	0	1	0	1	0	28.29	7	6.9	7	7	7.3	104	205	230	34	134	72.0661	20	0	0	0	1	1	0	0	0	0	0						1	1	20.5	23	13.4	7.20661	2
1782	0	53	0	2	1	0	0	2	1	1	1	1	24.48	6.8	6.6	6.3	6.4	5.9	75.3333	170	94	52	92	142.099	14	0	0	0	0	1	0	0	0	0	0						0	2	17	9.4	9.2	14.2099	1.4
1783	0	49	0	2	0	0	0	0	1	1	1	0	27.61	5.6	5.7	5.9	5.9	5.9	72.6667	215	159	48	138	76.3619	19	0	0	1	0	1	0	0	0	0	0						0	1	21.5	15.9	13.8	7.63619	1.9
1784	0	61	1	2	0	0	0	1	1	0	1	0	27.05	6.3	5.5	5.2	5.2	5.2	94.3333	236	60	46	176	81.7404	55	0	0	1	0	1	0	0	0	0	0						0	1	23.6	6	17.6	8.17404	5.5
1785	0	57	0	1	0	0	0	1	1	1	1	0	27.71	6.8	6.8	6.5	6.7	6.9	87.3333	170	143	51	104	118.447	23	0	1	1	0	2	0	0	0	0	0						0	2	17	14.3	10.4	11.8447	2.3
1786	0	42	1	2	1	0	0	1	1	1	1	1	19.14	6.1	6	5.8	5.8	5.7	85	228	119	49	149	84.47	22	0	0	1	0	3	0	0	0	1	0						0	2	22.8	11.9	14.9	8.447	2.2
1787	0	60	0	1	0	0	0	2	1	1	1	0	30.13	6.5	5.4	5.4	5.3	5.6	106.333	166	108	41	105	76.4658	31	0	1	1	0	1	0	0	0	0	0						0	2	16.6	10.8	10.5	7.64658	3.1
1788	1	44	1	3	1	0	0	2	1	1	1	1	38.68	6.2	7.6	9.1	7.6	9	108	178	86	50	114	133.449	25	0	0	0	1	2	0	0	0	0	0						1	2	17.8	8.6	11.4	13.3449	2.5
1789	1	36	1	2	0	1	0	2	1	1	1	0	34.39	7.1	10.6	8.6	7.6	7.1	105	147	99	32	96	108.77	90	0	0	0	0	3	0	1	0	0	0						1	2	14.7	9.9	9.6	10.877	9
1790	0	56	1	2	0	0	0	1	1	1	1	0	24.29	7.7	8.4	7.4	6.9	6.9	98	178	41	48	124	69.245	16	0	1	1	0	2	0	1	0	0	0						0	1	17.8	4.1	12.4	6.9245	1.6
1791	0	58	1	3	0	1	0	0	1	#NULL!	#NULL!	0	27.2	6.5	6.5	6.6	6.7	6.7	98	126	132	40	62	85.57	55	0	0	0	0	2	0	0	0	0	0						0	2	12.6	13.2	6.2	8.557	5.5
1792	1	57	1	1	1	1	0	0	1	0	0	0	25.73	6.4	8.3	7.8	7.3	9.3	101.667	256	179	53	182	62.4051	31	0	1	1	0	2	0	0	1	0	0						1	1	25.6	17.9	18.2	6.24051	3.1
1793	0	59	1	3	1	0	1	2	1	1	1	0	28.27	6.2	6.5	6.1	6.1	6.2	96.3333	94	36	25	52	98.94	19	0	1	1	0	1	0	1	0	0	0						0	2	9.4	3.6	5.2	9.894	1.9
1794	0	53	1	0	0	0	0	2	1	0	0	0	24.75	5.6	6.5	6.6	6.6	7	91.3333	200	180	37	138	53.0125	11	0	1	1	0	2	0	0	0	0	0						0	1	20	18	13.8	5.30125	1.1
1795	0	52	0	1	1	0	0	1	1	1	1	0	33.99	6.7	6.4	6.1	5.9	5.9	97	174	81	51	115	75.323	14	0	1	0	0	1	0	0	0	0	0						0	1	17.4	8.1	11.5	7.5323	1.4
1796	1	59	0	1	0	0	0	2	1	1	1	0	22.26	7.1	7.2	6.9	7.8	7.3	91.6667	203	229	52	100	120.696	15	0	0	0	0	3	0	0	0	0	0						1	2	20.3	22.9	10	12.0696	1.5
1797	0	58	1	1	0	0	0	1	1	1	1	1	20.7	5.5	5.6	5	5.6	5.2	92	185	114	43	109	78.5574	14	0	1	1	0	4	0	0	1	0	0						0	2	18.5	11.4	10.9	7.85574	1.4
1798	0	45	1	3	1	1	0	2	1	1	1	0	23.84	7.3	6.7	6.6	6.8	6.3	82	187	164	52	109	100.19	65	0	0	0	0	1	0	0	0	0	0						0	2	18.7	16.4	10.9	10.019	6.5
1799	0	51	0	1	0	0	0	0	1	0	1	0	26.13	7.8	7	6.4	6.4	6.1	109.333	194	97	57	107	109.062	26	0	0	0	0	1	0	0	0	0	0						0	1	19.4	9.7	10.7	10.9062	2.6
1800	0	47	0	3	1	0	0	0	1	#NULL!	#NULL!	1	29.93	5.7	5.8	5.6	5.9	5.9	91.3333	166	213	32	105	107.157	36	0	0	1	0	1	0	0	0	0	0						0	2	16.6	21.3	10.5	10.7157	3.6
1801	0	56	1	2	0	0	0	0	1	1	1	1	25	6.9	5.9	6.3	6	6	97.3333	106	81	42	44	71.6257	20	0	0	1	0	1	0	0	0	0	0						0	2	10.6	8.1	4.4	7.16257	2
1802	1	57	1	1	1	0	0	2	1	0	1	1	28.19	7.7	7.4	7.8	7.9	8.5	80.6667	232	132	51	167	67.3277	37	0	1	1	0	1	0	0	0	0	0						1	1	23.2	13.2	16.7	6.73277	3.7
1803	0	52	1	2	1	1	0	0	1	1	0	1	26.16	7.2	6.8	6.7	7	6.8	104.333	195	214	34	117	83.2523	31	0	0	1	0	2	0	0	0	0	0						0	2	19.5	21.4	11.7	8.32523	3.1
1804	0	45	1	2	0	0	0	0	1	1	1	1	28.92	7.7	6	6.2	6.5	6.5	116.667	136	134	32	80	78.9789	40	0	1	1	0	1	0	0	0	0	0						0	2	13.6	13.4	8	7.89789	4
1805	0	61	0	1	1	0	0	2	1	1	1	1	27.94	6.3	7.2	6.5	6.9	6.9	95	138	124	46	70	92.6655	67	0	0	1	0	4	1	0	0	0	0						0	2	13.8	12.4	7	9.26655	6.7
1806	1	49	1	2	1	0	0	0	1	#NULL!	#NULL!	1	28.49	7.3	7.2	8.2	8.2	7.5	83	175	140	34	126	94.13	16	0	0	1	1	1	0	0	0	0	0						1	1	17.5	14	12.6	9.413	1.6
1807	0	41	1	3	1	0	0	1	1	1	1	1	25.23	6.1	6.6	6.2	6.5	6.3	90.6667	127	47	36	78	135.376	45	2	0	1	0	2	0	0	0	0	0						0	2	12.7	4.7	7.8	13.5376	4.5
1808	1	36	1	3	1	0	0	1	1	1	1	1	28.36	7.6	6.4	6.7	6.9	7.4	95.3333	172	170	38	100	159.969	47	0	0	0	0	1	0	0	0	0	0						1	2	17.2	17	10	15.9969	4.7
1809	0	41	1	2	0	0	0	1	1	1	1	0	27.25	7.4	6.1	6.4	6.3	6.2	103	214	158	41	156	84.2884	32	0	0	1	0	1	0	0	0	0	0						0	1	21.4	15.8	15.6	8.42884	3.2
1810	1	44	0	2	0	0	0	2	1	1	1	0	38.76	7	7.2	8.5	7.7	9.2	91.6667	123	58	42	64	177.726	25	0	1	1	0	1	0	0	0	0	0						1	2	12.3	5.8	6.4	17.7726	2.5
1811	0	47	1	2	0	1	0	1	1	1	1	0	23.85	7.4	7.4	6.7	7.2	6.5	97.3333	184	97	36	123	108.29	10	0	1	0	0	1	0	0	0	0	0						0	1	18.4	9.7	12.3	10.829	1
1812	0	64	1	1	1	0	0	1	1	1	1	0	28.94	5.5	5.6	5.8	5.5	6	100.333	214	148	48	138	42.8074	14	0	1	1	0	4	0	0	0	1	0						0	2	21.4	14.8	13.8	4.28074	1.4
1813	0	53	1	3	0	0	0	2	1	1	1	0	26.83	6.1	5.8	6	5.9	5.8	98	152	129	42	92	82.2008	11	0	0	0	0	2	0	0	0	0	0						0	2	15.2	12.9	9.2	8.22008	1.1
1814	0	48	1	2	1	0	0	0	1	1	1	0	21.96	7.5	6.7	6	5.7	6	105.333	123	50	37	63	128.82	37	0	0	1	0	3	0	0	0	0	0						0	2	12.3	5	6.3	12.882	3.7
1815	0	47	1	2	1	0	0	1	1	1	1	0	25.34	6.6	6.1	6.3	6.2	6.2	110	181	211	41	105	81.63	25	0	1	1	1	4	1	0	0	1	0						0	2	18.1	21.1	10.5	8.163	2.5
1816	1	47	0	2	0	0	0	0	1	1	1	0	24.35	7.4	6.5	6.6	7.1	7.1	85.6667	180	137	40	115	128.71	22	0	0	0	0	2	0	0	0	0	0						1	2	18	13.7	11.5	12.871	2.2
1817	0	48	0	1	1	0	0	1	1	1	1	0	29.16	7.2	7.3	6.4	7.8	6.8	102.333	162	154	46	78	34.2592	19	0	1	1	0	1	0	0	0	1	0						0	2	16.2	15.4	7.8	3.42592	1.9
1818	1	50	1	3	1	0	0	0	1	1	1	0	26.63	6.2	6.4	6.4	7.1	7.1	99.6667	162	215	45	85	80.6355	21	0	1	1	0	1	0	0	0	0	0						1	2	16.2	21.5	8.5	8.06355	2.1
1819	0	37	0	2	1	0	0	0	1	1	1	0	23.86	6.2	6.3	6.2	6.1	5.9	76.6667	247	94	66	157	113.117	12	0	0	1	0	2	0	0	0	0	0						0	2	24.7	9.4	15.7	11.3117	1.2
1820	0	56	1	1	1	0	1	1	1	1	1	0	25.32	5.7	5.7	5.5	5.5	5.5	93.3333	169	66	59	89	107.73	15	0	1	0	1	2	0	0	0	0	0						0	2	16.9	6.6	8.9	10.773	1.5
1821	0	52	1	2	0	0	0	0	1	1	1	0	33.44	6.1	6.2	5.9	5.9	5.4	95.3333	154	75	23	121	89.76	58	0	0	0	0	2	0	0	0	0	0						0	2	15.4	7.5	12.1	8.976	5.8
1822	0	58	1	1	0	0	0	2	1	1	1	1	32.62	7.6	5.9	6.3	6.4	6.2	138.333	177	150	36	106	73.0968	16	0	1	0	0	1	0	0	0	0	0						0	2	17.7	15	10.6	7.30968	1.6
1823	0	51	0	3	0	0	0	2	1	1	1	0	25.67	7.3	6.6	6.8	6.8	6.5	72	128	68	47	63	96.0955	39	0	0	1	0	1	0	0	0	0	0						0	2	12.8	6.8	6.3	9.60955	3.9
1824	0	56	1	2	1	1	0	0	1	1	0	0	29.49	6.6	6.5	6.6	6.1	6.4	90.3333	150	159	33	88	92.6003	28	0	0	1	0	3	1	1	0	0	0						0	2	15	15.9	8.8	9.26003	2.8
1825	0	38	1	3	1	0	0	0	1	1	1	1	24.56	7.5	6.2	5.8	5.7	6	100.333	196	71	49	120	123.509	16	0	0	1	0	1	0	0	0	0	0						0	2	19.6	7.1	12	12.3509	1.6
1826	0	63	0	3	1	0	0	1	0	1	1	1	19.21	6.8	6.2	6.2	6	6	111.333	342	110	63	223	97.22	15	0	0	1	0	1	0	0	0	0	0						0	2	34.2	11	22.3	9.722	1.5
1827	0	64	1	3	1	0	0	2	1	1	0	0	23.55	5.9	6	6	5.9	6	90.3333	140	84	39	79	127.931	26	0	1	1	0	1	0	0	0	0	0						0	2	14	8.4	7.9	12.7931	2.6
1828	0	56	1	3	0	0	0	2	1	#NULL!	#NULL!	1	27.07	6.3	7.2	6.8	7.2	6.2	83	157	106	44	97	91.99	28	0	0	0	0	1	0	0	0	0	0						0	2	15.7	10.6	9.7	9.199	2.8
1829	0	43	1	3	1	0	0	#NULL!	0	#NULL!	#NULL!	0	35.68	6.3	5.8	5.6	5.9	5.7	92	131	122	38	81	96.6064	36	0	1	1	0	2	1	0	0	0	0						0	2	13.1	12.2	8.1	9.66064	3.6
1830	0	45	0	2	1	0	0	1	1	1	1	0	22.02	6.8	6.3	5.4	5.2	5.3	88	141	45	60	64	119.526	22	0	0	1	0	2	0	0	0	0	0						0	2	14.1	4.5	6.4	11.9526	2.2
1831	0	49	1	2	1	0	0	2	1	1	1	0	20.54	6	5.2	5.1	4.9	5.4	91	145	189	37	69	135.36	12	0	1	0	0	3	0	0	0	0	0						0	2	14.5	18.9	6.9	13.536	1.2
1832	0	61	1	2	0	1	0	0	1	1	1	0	27.3	6.5	6.2	5.7	6.6	5.8	115	231	879	33	84	122.3	30	0	1	0	1	3	0	0	0	0	0						0	2	23.1	87.9	8.4	12.23	3
1833	0	49	0	2	1	0	0	2	1	1	1	0	24.42	6.8	6.9	6.8	6.9	6.9	94.3333	130	161	42	60	86.09	31	0	0	1	0	1	0	0	0	0	0						0	2	13	16.1	6	8.609	3.1
1834	0	59	1	3	0	1	0	0	1	1	1	0	27.29	7.5	6.5	6.5	6.3	6	77.6667	103	63	47	38	135.296	30	0	1	0	0	2	1	1	0	0	0						0	2	10.3	6.3	3.8	13.5296	3
1835	1	54	0	2	1	0	0	2	1	1	1	1	25.97	7.5	8.2	9.5	8.8	8.7	79.3333	175	45	76	77	131.607	18	2	0	1	0	3	0	0	0	0	0						1	2	17.5	4.5	7.7	13.1607	1.8
1836	0	53	0	3	0	0	0	0	1	1	0	0	26.18	7.3	6.8	9.6	9.6	6.9	78	156	120	38	103	124.09	42	0	0	0	0	2	0	0	0	0	0						0	2	15.6	12	10.3	12.409	4.2
1837	0	32	0	3	1	0	0	0	1	1	1	0	38.76	6.6	6.3	6.4	6.7	6.6	98.3333	219	131	36	164	101.366	59	0	1	1	0	1	0	0	0	0	0						0	2	21.9	13.1	16.4	10.1366	5.9
1838	1	47	1	3	1	1	0	0	1	1	1	1	26.44	7.8	7.9	9	10.3	9.9	108.333	179	226	39	93	53.21	201	2	1	1	0	4	0	0	0	0	0						1	2	17.9	22.6	9.3	5.321	20.1
1839	0	41	1	3	1	1	0	0	1	0	1	1	32.91	7.3	7	6.6	6.4	6	92.6667	196	112	42	133	150.169	21	0	0	0	0	1	0	0	0	0	0						0	2	19.6	11.2	13.3	15.0169	2.1
1840	0	42	0	3	0	0	0	1	1	1	1	1	20.06	6.3	6.3	6	7	6.9	78	174	28	61	100	126.505	14	1	0	0	0	3	0	0	0	0	0						0	2	17.4	2.8	10	12.6505	1.4
1841	1	64	1	1	0	0	0	2	1	1	1	1	30.83	6.3	7.5	7.9	11.3	10.6	104.333	174	353	46	82	60.95	44	0	1	1	0	4	1	0	0	0	0						1	2	17.4	35.3	8.2	6.095	4.4
1842	1	40	0	2	1	0	0	0	1	#NULL!	#NULL!	0	37.14	7.5	6.5	6.9	6.9	9.3	105.667	157	184	52	77	119.299	8	2	1	0	0	2	0	0	0	0	0						1	2	15.7	18.4	7.7	11.9299	0.8
1843	0	39	1	3	1	0	0	1	1	1	0	0	29.98	6.6	6.3	6.2	5.9	5.8	120	106	37	38	57	70.7957	25	0	1	1	0	2	1	1	0	0	0						0	2	10.6	3.7	5.7	7.07957	2.5
1844	0	52	0	1	0	0	0	0	1	1	1	0	27.55	6.9	6.1	6.4	6.6	6.7	108.333	196	73	51	123	177.15	29	0	1	1	0	3	0	0	0	0	0						0	2	19.6	7.3	12.3	17.715	2.9
1845	0	58	1	2	0	0	0	0	1	0	1	0	30.96	7.6	7.1	7.1	7.5	7	102.333	233	169	58	140	82.5712	39	0	1	1	0	1	0	0	0	0	0						0	1	23.3	16.9	14	8.25712	3.9
1846	0	47	1	2	1	1	0	2	1	1	1	0	23.08	6.6	5.4	5.4	5.3	5.6	100.333	198	142	35	133	76.47	17	2	0	1	0	1	0	0	0	0	0						0	2	19.8	14.2	13.3	7.647	1.7
1847	0	57	1	1	0	0	1	2	1	1	1	0	22.79	6.9	6.6	6.6	6.6	6.6	96	117	181	35	49	96.8399	21	0	1	1	0	1	0	1	0	0	0						0	2	11.7	18.1	4.9	9.68399	2.1
1848	1	45	1	2	1	1	1	0	1	0	1	0	24.35	6.8	7.4	8.1	8.1	7.9	92	171	256	36	92	104.537	48	0	0	0	1	1	0	0	0	0	0						1	1	17.1	25.6	9.2	10.4537	4.8
1849	1	40	1	2	0	0	0	0	1	0	1	0	24.98	6.6	9	9.7	9.9	10.1	95	117	80	49	53	107.067	8	0	0	0	0	3	0	0	0	0	0						1	1	11.7	8	5.3	10.7067	0.8
1850	0	44	1	3	1	0	0	0	1	1	1	1	32.07	6.1	6.5	6.6	6.8	6.9	102.333	157	150	42	91	74.2756	31	0	0	1	0	1	0	0	0	0	0						0	2	15.7	15	9.1	7.42756	3.1
1851	0	60	1	1	0	1	0	0	1	0	0	0	25.77	7.4	6.4	6.4	6.4	6.4	85.3333	179	49	53	108	68.282	18	0	0	0	0	1	0	0	0	0	0						0	1	17.9	4.9	10.8	6.8282	1.8
1852	0	64	1	1	1	0	0	2	1	1	1	0	20.81	6	6.1	6.2	6.2	5.9	89.3333	139	51	58	76	60.9549	16	0	1	0	0	1	0	0	0	0	0						0	1	13.9	5.1	7.6	6.09549	1.6
1853	0	60	1	1	0	1	0	1	1	1	1	0	29.34	6.5	6.3	6.6	6.7	6.5	87.3333	190	197	37	102	78.9476	46	0	0	1	0	1	0	0	0	0	0						0	2	19	19.7	10.2	7.89476	4.6
1854	1	61	1	2	0	1	0	0	1	0	0	0	26.3	7.1	6.3	6.3	6.2	7.1	129	179	139	41	107	98.2766	16	0	1	0	0	1	0	0	0	0	0						1	1	17.9	13.9	10.7	9.82766	1.6
1855	0	47	1	3	0	0	0	0	1	1	1	0	27.88	5.6	5.5	5.6	5.6	5.8	91	169	88	53	96	77.0783	45	0	0	1	0	2	0	0	0	0	0						0	2	16.9	8.8	9.6	7.70783	4.5
1856	0	54	1	2	0	0	0	1	1	0	1	0	24.79	5.6	5.4	5.8	5.7	5.6	113.667	167	88	69	89	87.9359	20	0	0	1	0	1	0	0	0	0	0						0	1	16.7	8.8	8.9	8.79359	2
1857	1	55	0	1	1	0	0	0	1	1	1	0	17.94	7.3	6.6	7.3	7.4	7.1	82.6667	192	128	82	87	125.187	25	0	0	0	0	1	0	0	0	0	0						1	1	19.2	12.8	8.7	12.5187	2.5
1858	0	57	0	2	1	0	0	1	1	0	1	0	23.22	6.4	6.7	6.4	6.6	6.3	91.3333	113	114	39	55	118.9	20	0	0	1	0	4	0	0	0	1	0						0	2	11.3	11.4	5.5	11.89	2
1859	0	53	1	1	0	1	0	2	1	1	1	0	24.88	7.8	5.8	5.4	5.4	6.3	108.667	141	393	34	53	140.937	14	0	1	0	1	3	0	0	0	0	0						0	1	14.1	39.3	5.3	14.0937	1.4
1860	1	56	1	1	0	1	0	0	1	0	1	0	23.57	6.7	6.7	8.3	7.1	7.1	78	131	68	45	72	69.245	13	0	0	0	0	1	0	0	0	0	0						1	1	13.1	6.8	7.2	6.9245	1.3
1861	0	58	0	2	0	0	0	0	1	0	1	0	31.89	7.9	7.2	5.7	6	6.6	110.333	181	103	49	105	123.852	23	0	0	0	0	1	0	1	0	0	0						0	1	18.1	10.3	10.5	12.3852	2.3
1862	1	57	1	1	0	0	0	0	1	1	1	0	28.33	6	6.7	8.5	8.5	8.8	99	202	120	48	145	72.5454	27	0	1	1	0	4	0	0	1	0	0						1	1	20.2	12	14.5	7.25454	2.7
1863	0	45	1	2	1	0	0	1	1	#NULL!	#NULL!	0	26.92	6	5.3	6.5	6.5	5.1	96.6667	135	58	43	80	112.119	75	0	0	1	0	1	0	0	0	0	0						0	2	13.5	5.8	8	11.2119	7.5
1864	0	56	1	2	1	0	0	2	1	1	1	1	26.4	7.2	6.1	6.1	6.4	6.4	117	186	158	52	116	77.0186	40	0	0	0	1	2	0	0	0	0	0						0	1	18.6	15.8	11.6	7.70186	4
1865	1	47	0	2	1	0	0	1	1	1	1	0	33.78	7.7	7.7	7.5	6.4	7.5	106.333	118	137	44	54	76.5569	15	0	1	1	0	1	0	0	0	0	0						1	1	11.8	13.7	5.4	7.65569	1.5
1866	0	51	0	1	1	0	0	0	1	1	1	0	25.66	7.2	5.7	5.9	5.9	6	116.667	160	45	46	100	126.636	15	0	0	0	0	1	0	0	0	0	0						0	2	16	4.5	10	12.6636	1.5
1867	0	54	0	2	0	0	0	2	1	1	1	1	25.94	6.9	6.5	6.4	6.3	6.3	105.333	201	178	69	59	122.88	24	0	1	0	0	1	0	0	0	0	0						0	2	20.1	17.8	5.9	12.288	2.4
1868	1	36	1	3	1	0	0	1	1	1	1	0	28.72	7.1	6.1	6	6.1	7.2	98.6667	192	248	37	123	73.7727	37	0	1	1	0	1	0	0	0	0	0						1	1	19.2	24.8	12.3	7.37727	3.7
1869	0	40	1	3	1	1	0	2	1	1	1	0	21.99	6.3	4.4	4.4	4.4	4.1	79	115	43	48	51	93.4596	10	0	0	0	1	1	0	0	0	0	0						0	2	11.5	4.3	5.1	9.34596	1
1870	0	63	1	2	1	0	0	2	1	1	1	0	28.73	7.2	7.8	7.2	6.1	5.4	86.3333	145	156	38	76	99.06	104	0	1	1	0	4	0	0	0	0	0						0	2	14.5	15.6	7.6	9.906	10.4
1871	0	56	1	2	1	1	1	2	1	1	1	0	29.63	7.8	6.9	6.6	6.9	6.5	94	136	64	44	81	101.464	27	0	0	1	0	1	0	0	0	0	0						0	2	13.6	6.4	8.1	10.1464	2.7
1872	0	57	0	1	0	0	0	1	1	1	1	0	29.91	7.2	7.2	6.7	6.5	6.2	92.6667	223	132	40	153	68.01	25	0	0	1	0	1	0	0	0	1	0						0	2	22.3	13.2	15.3	6.801	2.5
1873	0	46	1	2	1	0	0	2	1	1	1	0	29.27	6.4	6.6	7.4	6.8	6.3	105.667	113	80	36	63	95.7386	23	0	0	1	0	1	0	0	0	0	0						0	2	11.3	8	6.3	9.57386	2.3
1874	1	49	1	2	1	0	0	2	1	1	1	1	26.82	7.6	8.9	7.5	7	8.3	96	200	219	37	124	135.36	74	2	0	0	0	3	0	0	0	0	0						1	2	20	21.9	12.4	13.536	7.4
1875	0	54	1	2	1	0	0	2	1	1	1	1	24.22	6.8	6.6	6.2	5.9	5.9	97.3333	213	104	46	142	137.75	27	1	0	1	0	1	0	0	0	0	0						0	2	21.3	10.4	14.2	13.775	2.7
1876	0	59	0	2	1	0	0	2	1	1	0	0	30.99	6.5	6.4	6.2	6.4	6.2	94	136	103	49	68	113.13	36	0	1	1	0	1	0	0	0	0	0						0	2	13.6	10.3	6.8	11.313	3.6
1877	0	59	1	1	0	1	0	0	1	1	1	0	25.64	6.9	6.8	6.4	6.3	6.3	105.333	172	86	41	106	77.1099	29	0	1	0	0	1	0	0	0	0	0						0	2	17.2	8.6	10.6	7.71099	2.9
1878	1	36	0	2	1	0	0	0	0	#NULL!	#NULL!	1	19.46	6.1	7.7	7.4	6.7	9.3	98.3333	168	484	66	29	96.2677	28	2	0	0	0	1	0	0	0	0	0						1	2	16.8	48.4	2.9	9.62677	2.8
1879	0	39	1	2	1	1	1	0	1	1	1	0	31.69	6.8	6.8	6.5	6.5	6.3	100.333	219	317	48	121	92.5782	23	0	1	1	1	1	0	0	0	0	0						0	2	21.9	31.7	12.1	9.25782	2.3
1880	0	33	1	3	1	0	0	2	1	1	1	1	33.47	6.2	6.2	6.3	6.6	6.6	80.6667	115	110	30	62	116.351	20	0	0	1	0	1	0	0	0	0	0						0	2	11.5	11	6.2	11.6351	2
1881	1	33	0	2	0	0	0	0	1	1	1	1	21.05	6.8	7.3	7.4	6.8	7.8	78.6667	154	46	55	80	182.715	17	1	0	0	0	1	0	0	0	0	0						1	2	15.4	4.6	8	18.2715	1.7
1882	1	57	0	1	0	0	0	1	1	1	1	1	24.47	7.1	6.9	6.8	7.8	7.6	98.3333	111	106	43	47	121.115	27	0	1	1	0	2	1	0	0	0	0						1	2	11.1	10.6	4.7	12.1115	2.7
1883	0	46	0	2	1	0	0	2	1	1	1	0	24.88	7.4	7	5.9	7	6.7	93	216	128	43	149	129.827	25	0	0	1	0	3	0	0	0	0	0						0	2	21.6	12.8	14.9	12.9827	2.5
1884	0	48	1	2	1	1	0	0	1	1	1	0	22.6	6.7	6.5	6.5	5.7	6.1	87	208	201	49	107	122.38	17	2	1	0	0	1	0	0	0	0	0						0	2	20.8	20.1	10.7	12.238	1.7
1885	1	46	0	2	1	0	0	2	1	1	1	1	29.55	6.7	6.5	6.2	7.1	7.1	72.3333	193	68	62	131	105.13	15	0	0	1	0	1	0	0	0	0	0						1	2	19.3	6.8	13.1	10.513	1.5
1886	0	31	1	2	1	0	0	1	1	1	1	1	27.47	5.9	5.5	6.4	8.7	6	88.3333	196	119	48	115	114.279	20	0	0	0	0	1	0	0	0	0	0						0	2	19.6	11.9	11.5	11.4279	2
1887	0	48	1	3	0	1	1	0	1	1	1	1	27.12	6.1	6	6.3	6.6	5.7	91	203	267	40	114	101.708	44	0	0	1	0	1	0	0	0	0	0						0	2	20.3	26.7	11.4	10.1708	4.4
1888	0	52	1	2	0	1	0	0	1	1	1	0	22.64	6.6	6.8	7.7	6.9	7	90.3333	177	130	56	96	100.069	39	0	0	1	0	3	0	0	0	0	0						0	2	17.7	13	9.6	10.0069	3.9
1889	0	62	0	1	1	0	0	1	1	1	1	1	28.74	6.2	6.2	6.4	6.4	6.9	93	141	68	58	62	114.394	19	0	1	1	0	4	1	0	0	0	0						0	2	14.1	6.8	6.2	11.4394	1.9
1890	0	52	1	2	0	0	0	0	1	1	1	1	27.58	6.2	6	6.2	6.1	6.2	96.3333	120	55	44	66	82.931	32	0	1	0	0	1	1	0	0	0	0						0	2	12	5.5	6.6	8.2931	3.2
1891	1	61	0	2	0	0	0	0	0	#NULL!	#NULL!	0	18.95	9.9	7.6	7.6	7.6	7.6	75	270	143	74	176	72.681	18	0	0	1	0	1	0	0	0	0	1						1	1	27	14.3	17.6	7.2681	1.8
1892	0	59	0	3	1	0	0	2	1	1	1	0	26.22	9.6	6.3	5.9	6	6	103.667	211	125	53	135	105.905	24	0	1	1	0	1	0	0	0	0	1						0	1	21.1	12.5	13.5	10.5905	2.4
1893	1	38	0	2	1	0	0	0	1	0	1	0	29.61	9.4	7	7.1	7.1	7.1	107	272	318	46	179	134.887	77	0	0	1	0	1	0	0	0	0	1						1	1	27.2	31.8	17.9	13.4887	7.7
1894	0	62	0	2	0	0	0	2	1	1	1	0	20.94	13.6	6.7	6.8	6.5	6.8	102.667	243	74	69	138	141.18	15	0	1	0	0	1	0	0	0	0	1						0	2	24.3	7.4	13.8	14.118	1.5
1895	0	50	0	2	1	0	0	0	1	0	1	0	21.3	8.1	6.5	6.7	6.4	7	93.3333	172	210	39	102	109.499	36	0	0	0	0	4	0	0	0	0	1						0	1	17.2	21	10.2	10.9499	3.6
1896	0	55	1	2	1	0	0	0	1	0	1	0	29.05	11.9	8.3	7.2	7.7	6.8	112	130	136	39	75	77.579	17	0	0	1	0	1	0	0	0	0	1						0	1	13	13.6	7.5	7.7579	1.7
1897	0	56	1	3	1	0	0	2	1	1	1	1	23.78	12	5.8	6.7	6.7	6	92.6667	162	46	55	100	65.78	23	2	1	0	0	1	0	0	0	0	1						0	1	16.2	4.6	10	6.578	2.3
1898	0	55	0	2	0	0	0	2	1	1	1	1	30.97	9.3	6.3	6	5.8	6	88.6667	151	77	49	78	75.5591	45	0	1	0	0	1	0	0	0	0	1						0	2	15.1	7.7	7.8	7.55591	4.5
1899	0	53	1	3	1	1	0	2	1	1	1	0	23.21	14.1	6.3	6.1	6.8	6.5	78.6667	157	269	30	102	78.1646	21	0	0	0	1	1	0	0	0	0	1						0	1	15.7	26.9	10.2	7.81646	2.1
1900	0	47	1	2	0	1	0	2	1	1	1	1	27.5	13.3	6.3	6.4	6.2	6.2	97.6667	167	239	31	93	91.32	36	2	1	0	0	3	0	0	0	0	1						0	2	16.7	23.9	9.3	9.132	3.6
1901	0	61	0	1	0	0	0	0	1	1	1	1	28.21	13.9	6	6.2	6.5	6.7	106.667	191	78	84	102	105.196	36	2	0	0	0	1	0	0	0	0	1						0	1	19.1	7.8	10.2	10.5196	3.6
1902	0	35	1	2	1	1	0	0	0	1	1	0	27.81	9.9	7	7.4	7.4	6.8	91.3333	242	681	39	91	124.23	25	0	0	0	1	1	0	0	0	0	1						0	2	24.2	68.1	9.1	12.423	2.5
1903	0	52	0	1	0	0	0	0	1	0	0	0	23.8	11.4	6	6	7.1	6.4	104.667	198	194	37	129	151.118	43	0	0	0	0	2	0	0	0	0	1						0	1	19.8	19.4	12.9	15.1118	4.3
1904	0	59	0	3	0	0	0	2	1	1	1	0	25.66	10.3	6.1	5.9	5.9	5.7	96	220	138	43	135	103.971	26	0	0	1	0	1	1	0	0	0	1						0	2	22	13.8	13.5	10.3971	2.6
1905	0	55	0	2	1	0	0	0	1	1	1	0	23.63	9.8	6.8	7.7	7.5	6.8	106.667	193	563	40	72	65.0059	21	0	1	0	1	1	0	0	0	0	1						0	1	19.3	56.3	7.2	6.50059	2.1
1906	0	58	0	2	1	0	0	2	1	1	1	0	21.72	13.6	7.4	6.6	6.7	6.6	93.3333	143	37	44	80	95.3091	21	0	0	0	0	1	0	0	0	0	1						0	2	14.3	3.7	8	9.53091	2.1
1907	1	54	1	1	0	1	0	1	1	1	1	0	22.79	9.8	7.3	8	8	9.8	75.6667	142	92	52	67	77.579	22	0	0	1	0	2	0	0	0	0	1						1	1	14.2	9.2	6.7	7.7579	2.2
1908	0	46	1	2	0	0	0	0	1	0	1	0	26.25	12.5	6.2	5.6	5.5	5.2	92	196	126	38	134	72.0661	45	0	1	1	0	1	0	0	0	0	1						0	1	19.6	12.6	13.4	7.20661	4.5
1909	0	35	1	2	1	0	0	2	1	1	1	1	24.93	16.4	4.9	4.9	5.1	5.2	86	127	57	53	68	94.8109	31	2	1	1	0	3	0	1	1	0	1						0	1	12.7	5.7	6.8	9.48109	3.1
1910	0	39	0	2	1	0	0	0	1	0	1	0	24.34	8	6	6	6.1	6.3	92.6667	163	108	53	99	115.125	51	0	0	0	0	1	0	0	0	0	1						0	1	16.3	10.8	9.9	11.5125	5.1
1911	1	52	0	2	0	0	0	0	1	1	1	0	30.47	9.9	8	6.8	7.7	7.7	93.3333	278	134	58	158	126.612	42	0	1	0	1	3	0	0	0	0	1						1	1	27.8	13.4	15.8	12.6612	4.2
1912	0	49	1	3	0	0	0	2	1	1	1	1	23.84	10.7	5.9	5.9	5.9	6.2	86.3333	134	76	34	82	92.04	14	0	0	1	0	1	0	0	0	0	1						0	2	13.4	7.6	8.2	9.204	1.4
1913	0	59	1	1	1	1	0	2	1	1	1	0	18.92	12.2	7.4	6.2	6.1	6.1	85.3333	161	45	47	91	125.73	22	0	0	0	0	1	0	0	0	0	1						0	2	16.1	4.5	9.1	12.573	2.2
1914	0	52	1	3	0	0	0	0	1	#NULL!	#NULL!	0	27.02	8	7.9	5.2	5.2	5.2	101.333	139	135	42	79	78.4674	32	0	1	1	0	1	0	0	0	0	1						0	1	13.9	13.5	7.9	7.84674	3.2
1915	0	53	1	1	0	1	0	0	1	#NULL!	#NULL!	0	23.26	8.4	6.5	7.1	7.1	7	83.3333	248	193	36	158	37.2673	14	0	0	1	0	2	1	0	0	1	1						0	1	24.8	19.3	15.8	3.72673	1.4
1916	1	41	0	2	0	0	0	0	1	1	1	0	39.61	10.5	8.5	7	7	11.1	99.6667	199	93	47	138	91.7655	18	0	0	1	0	2	0	0	0	0	1						1	1	19.9	9.3	13.8	9.17655	1.8
1917	0	52	1	2	1	0	0	1	1	1	1	0	23.77	9.3	6.3	6.1	6.1	6.1	110.667	215	177	45	138	87.4894	49	0	0	1	0	2	0	0	0	0	1						0	2	21.5	17.7	13.8	8.74894	4.9
1918	0	37	1	3	1	0	0	0	1	1	1	1	24.76	12.2	6.6	6.6	7.1	6.5	102.667	200	118	53	130	120.898	39	0	1	1	0	1	0	0	0	0	1						0	2	20	11.8	13	12.0898	3.9
1919	0	50	1	1	1	0	0	0	1	0	1	0	20.3	10.4	6.7	6.3	6.6	6.9	99.3333	239	92	57	79	76.3104	10	0	0	1	0	1	0	0	0	0	1						0	1	23.9	9.2	7.9	7.63104	1
1920	0	64	1	3	0	0	0	2	1	1	1	1	20.03	11	4.9	4.9	4.8	5.2	93.6667	228	32	97	99	128.217	17	1	0	0	0	1	0	0	0	0	1						0	2	22.8	3.2	9.9	12.8217	1.7
1921	1	48	0	2	0	0	0	0	1	1	1	0	33.81	10.6	8.1	8.1	8.6	10	85	150	259	36	72	125.858	37	0	0	1	1	2	0	0	0	0	1						1	2	15	25.9	7.2	12.5858	3.7
1922	1	46	1	2	1	1	0	0	1	#NULL!	#NULL!	0	22.23	9.4	8.1	9.6	9.9	9.9	99.6667	295	167	67	197	80.4448	51	1	1	1	0	1	1	1	0	0	1						1	1	29.5	16.7	19.7	8.04448	5.1
1923	0	41	1	3	1	0	0	0	1	0	0	0	29.51	10.5	5.8	5.6	5.6	5.5	98	176	89	47	107	99.8375	29	0	0	0	0	1	0	0	0	0	1						0	1	17.6	8.9	10.7	9.98375	2.9
1924	1	50	0	3	1	0	0	0	1	0	1	0	28.25	13.7	7.3	9.8	9.8	9	78.6667	152	45	50	83	133.679	24	0	0	1	0	1	0	0	0	0	1						1	2	15.2	4.5	8.3	13.3679	2.4
1925	0	50	1	2	0	1	0	0	1	1	1	0	23.02	10	5.6	5.9	5.9	5.9	102	104	71	35	57	67.31	28	1	0	0	0	3	0	0	0	0	1						0	2	10.4	7.1	5.7	6.731	2.8
1926	1	54	0	1	1	0	0	0	1	0	0	0	25.48	10.5	7.5	9.2	9.2	8.7	85.3333	250	135	54	145	86.8771	39	0	0	1	0	1	0	0	0	0	1						1	1	25	13.5	14.5	8.68771	3.9
1927	1	32	1	1	1	1	0	1	1	0	1	0	23.83	10.7	7	7.2	7.4	7.4	98.3333	237	107	45	159	169.077	44	0	0	1	0	1	0	0	0	0	1						1	2	23.7	10.7	15.9	16.9077	4.4
1928	1	54	0	2	0	0	0	2	1	1	1	0	24.54	8.2	6.4	6.4	7.3	7.6	105	210	256	49	129	99.9375	24	0	0	1	0	1	0	0	0	0	1						1	1	21	25.6	12.9	9.99375	2.4
1929	1	58	0	2	0	0	0	0	1	#NULL!	#NULL!	0	30.32	8.5	8.5	7.2	7.6	7.6	97.6667	207	185	64	115	129.71	29	0	1	1	0	1	1	0	0	0	1						1	2	20.7	18.5	11.5	12.971	2.9
1930	0	42	1	3	1	0	0	0	1	1	1	1	25.12	13.6	5.9	5.8	5.7	6.8	85.6667	205	108	43	142	112.476	19	0	0	1	0	1	0	0	0	0	1						0	2	20.5	10.8	14.2	11.2476	1.9
1931	1	59	0	0	0	0	0	0	1	0	0	0	30.1	11.2	10	10	8.8	8.8	108.667	201	187	34	131	38.4882	8	0	1	0	0	4	0	0	0	0	1						1	1	20.1	18.7	13.1	3.84882	0.8
1932	0	47	1	2	1	1	0	0	1	1	1	1	28.91	9.5	7	6.5	6.5	5.9	117.333	298	923	38	101	116.516	30	0	1	0	1	2	0	0	0	0	1						0	2	29.8	92.3	10.1	11.6516	3
1933	0	59	1	1	0	0	0	2	1	1	1	0	24.79	12.3	6.9	6.9	6.5	6.5	110.333	152	107	59	75	119.35	17	0	1	0	0	2	0	0	1	0	1						0	2	15.2	10.7	7.5	11.935	1.7
1934	1	55	0	1	1	0	0	2	1	1	0	0	24.03	12.9	11.5	11.5	11.6	9.9	78.6667	218	73	54	141	93.8578	21	2	0	1	0	1	0	0	0	0	1						1	1	21.8	7.3	14.1	9.38578	2.1
1935	1	62	0	1	1	0	0	0	1	0	1	1	24.17	11.9	6.4	7.2	7.9	7.9	90	289	323	52	178	107.47	33	0	1	1	0	1	0	0	0	0	1						1	2	28.9	32.3	17.8	10.747	3.3
1936	1	58	0	1	0	0	0	0	1	0	1	0	25.25	14.3	7.6	7.8	7.8	9	109.667	217	118	47	142	73.6716	40	0	1	1	0	2	0	0	0	0	1						1	1	21.7	11.8	14.2	7.36716	4
1937	1	36	1	2	0	1	0	0	1	#NULL!	#NULL!	0	19.95	13.1	6.5	6.5	8.5	8.5	89.6667	152	197	36	82	152.448	18	0	0	0	0	1	0	0	0	0	1						1	1	15.2	19.7	8.2	15.2448	1.8
1938	0	45	0	1	1	1	0	0	1	#NULL!	#NULL!	0	24.29	13.4	5.5	5.5	5.4	5.4	115.667	186	157	51	117	130.361	25	0	1	0	0	1	0	0	0	0	1						0	1	18.6	15.7	11.7	13.0361	2.5
1939	0	55	0	1	1	0	0	0	1	0	1	0	24.96	9.3	5.7	5.8	6.1	6.7	110.333	260	423	44	128	93.8578	41	0	1	0	1	1	0	0	0	0	1						0	1	26	42.3	12.8	9.38578	4.1
1940	1	49	0	1	1	0	0	2	1	1	1	0	27.76	8.1	6.9	8	7	7.2	84.3333	149	138	51	85	173.965	62	0	0	1	0	2	0	0	0	0	1						1	2	14.9	13.8	8.5	17.3965	6.2
1941	1	43	1	2	0	0	0	0	0	0	1	0	25.76	9.8	7.6	8.4	8.4	8.4	100.333	164	166	54	83	92.0976	21	0	1	0	0	1	0	0	0	0	1						1	1	16.4	16.6	8.3	9.20976	2.1
1942	0	52	0	2	0	0	0	0	1	1	1	0	26.61	10	6.4	6	6.1	5.8	67.3333	250	307	53	128	75.323	21	0	0	0	0	1	0	0	0	0	1						0	1	25	30.7	12.8	7.5323	2.1
1943	1	47	1	2	0	0	0	0	1	1	1	0	28.12	8.1	7.8	7.8	8.2	8.2	128.333	167	141	31	111	58.919	101	0	1	0	1	3	1	0	1	1	1						1	1	16.7	14.1	11.1	5.8919	10.1
1944	1	56	0	1	0	0	0	0	1	1	1	1	37.33	8.3	7.4	8	9.2	10.7	92.6667	106	117	32	60	111.98	18	0	1	1	0	1	0	1	0	0	1						1	2	10.6	11.7	6	11.198	1.8
1945	0	61	0	2	0	0	0	0	1	1	1	0	25.24	9	7.1	6.3	6.5	6.9	93.3333	177	53	51	97	77.368	27	0	0	0	0	1	0	0	0	0	1						0	2	17.7	5.3	9.7	7.7368	2.7
1946	1	41	0	2	0	0	0	0	1	0	1	0	25.59	13.9	12.6	9.9	9	10.1	104.333	534	1218	51	235	158.551	31	1	1	0	1	1	0	0	0	0	1						1	1	53.4	121.8	23.5	15.8551	3.1
1947	1	50	0	2	0	0	0	2	1	1	1	1	30.09	14.5	6.9	7	7.2	7.2	93.3333	184	124	39	115	136.532	21	0	0	0	0	1	0	0	0	0	1						1	2	18.4	12.4	11.5	13.6532	2.1
1948	0	61	0	1	1	0	0	0	1	0	1	0	25.28	9.9	6.2	6.2	5.5	5.4	93.6667	178	151	50	111	85.0701	67	0	0	0	1	4	0	0	0	0	1						0	1	17.8	15.1	11.1	8.50701	6.7
1949	0	50	0	2	1	0	0	0	1	1	1	0	19.92	10.1	7.3	6.8	7.3	7	101	208	79	79	120	127.618	21	0	1	0	0	1	0	0	0	0	1						0	1	20.8	7.9	12	12.7618	2.1
1950	1	63	1	1	0	1	0	2	1	1	1	0	39.19	9	8.7	8.2	7.6	7.7	125	139	95	38	84	67.3932	16	2	1	1	0	2	0	0	0	0	1						1	1	13.9	9.5	8.4	6.73932	1.6
1951	1	47	0	1	0	1	0	0	0	0	1	0	22.01	11.8	9.8	9.9	10.2	9.5	85	192	99	51	116	89.6939	24	1	0	1	0	4	0	0	0	0	1						1	1	19.2	9.9	11.6	8.96939	2.4
1952	0	62	0	1	0	0	0	0	1	0	1	0	29.53	11.8	6.3	6	8	6.5	116.667	207	101	51	109	101.298	94	0	0	0	0	1	0	0	0	0	1						0	1	20.7	10.1	10.9	10.1298	9.4
1953	1	62	0	2	0	0	0	2	1	1	1	1	24.24	8.5	9.3	8.3	8.3	8.1	105.333	242	92	74	159	72.8345	19	0	1	1	0	1	0	0	0	0	1						1	1	24.2	9.2	15.9	7.28345	1.9
1954	0	56	0	1	1	0	0	2	1	1	1	0	23.29	11.4	7.7	7.7	6.7	7	92.6667	242	153	63	149	107.15	16	0	0	0	0	1	0	0	0	0	1						0	2	24.2	15.3	14.9	10.715	1.6
1955	0	54	0	1	0	0	0	0	1	0	1	0	22.65	10.4	6.2	6.2	5.9	6	113.333	227	101	36	169	125.651	17	0	1	1	0	1	0	0	0	0	1						0	1	22.7	10.1	16.9	12.5651	1.7
1956	0	61	1	3	1	0	0	2	1	1	0	1	21.26	8	8.1	6.9	6	6.2	92	199	96	58	129	75.9654	27	1	1	0	0	2	0	0	0	0	1						0	1	19.9	9.6	12.9	7.59654	2.7
1957	1	46	0	3	0	0	0	2	1	1	1	1	22.64	8.6	7.6	7.6	7.9	7.5	95.6667	145	70	72	56	130.408	21	0	0	1	0	1	0	0	0	0	1						1	2	14.5	7	5.6	13.0408	2.1
1958	0	61	1	2	0	1	1	2	1	0	0	0	24.83	11.6	6.5	6.1	6.7	7	108.333	154	95	58	82	85.7868	33	0	0	1	0	1	0	0	0	0	1						0	1	15.4	9.5	8.2	8.57868	3.3
1959	0	63	1	3	0	0	0	2	1	1	1	0	25.51	13.7	6.2	6.4	6.8	6.8	88.3333	186	140	36	121	115.808	18	0	0	1	0	1	0	0	0	0	1						0	2	18.6	14	12.1	11.5808	1.8
1960	0	62	0	2	0	0	0	2	1	1	0	1	22.6	11.9	5.9	6.1	6.4	6.7	86.3333	159	61	56	93	144.891	18	0	0	0	0	1	0	0	0	0	1						0	2	15.9	6.1	9.3	14.4891	1.8
1961	0	61	0	1	0	0	0	0	1	0	1	0	25.31	10.3	7.1	6.6	6.6	7	83.6667	183	146	45	105	105.196	48	0	0	0	0	1	0	0	0	0	1						0	1	18.3	14.6	10.5	10.5196	4.8
1962	1	56	0	1	0	0	0	2	1	0	1	0	24.53	8.8	8.5	7.5	8.1	8.4	95.3333	259	185	56	175	124.732	11	0	1	1	0	2	0	0	0	0	1						1	1	25.9	18.5	17.5	12.4732	1.1
1963	0	53	0	3	0	0	0	2	1	0	0	0	34.05	11.2	7.8	6.3	5.9	6	97	199	208	48	118	75.323	28	0	1	1	0	1	0	0	0	0	1						0	1	19.9	20.8	11.8	7.5323	2.8
1964	0	50	1	3	1	0	0	1	1	1	1	0	27.68	9.2	7.6	7.3	7.3	6.8	79	188	142	40	120	45.9825	38	0	0	0	0	1	0	0	0	1	1						0	1	18.8	14.2	12	4.59825	3.8
1965	0	59	0	2	0	0	0	2	1	0	0	0	24.03	9.4	5.7	5.7	5.7	5.6	95.3333	195	91	58	120	105.905	20	0	0	0	0	1	0	0	0	0	1						0	1	19.5	9.1	12	10.5905	2
1966	1	56	0	0	1	0	0	2	1	1	1	0	31.9	11.2	7.2	7	7.5	7.8	95	163	81	89	62	86.2494	50	0	0	0	0	3	0	0	0	0	1						1	1	16.3	8.1	6.2	8.62494	5
1967	1	58	1	3	1	0	0	0	1	1	1	0	27.21	8.8	6.8	7.4	7	7.4	95.6667	205	168	36	138	63.4	62	0	0	1	0	1	0	0	0	0	1						1	2	20.5	16.8	13.8	6.34	6.2
1968	0	55	0	0	0	0	0	0	1	0	1	0	29.67	9.5	7.8	7.7	6.6	6.9	94.6667	279	402	33	180	65.0059	52	0	1	1	0	1	1	0	1	0	1						0	1	27.9	40.2	18	6.50059	5.2
1969	1	55	0	1	1	0	0	1	1	0	1	0	29.54	9.3	7.2	8.2	6.6	7.8	94.6667	166	422	32	79	68.5073	61	0	1	0	1	3	1	0	0	0	1						1	1	16.6	42.2	7.9	6.85073	6.1
1970	1	48	0	1	0	0	0	0	1	0	1	0	27.89	13.9	13.9	5.9	7.5	10.2	101	263	400	35	161	96.4669	100	0	0	1	0	1	0	0	0	0	1						1	1	26.3	40	16.1	9.64669	10
1971	1	52	1	2	1	0	0	0	1	1	1	0	25.85	10.3	9.1	6.1	6.6	9.8	99.6667	116	67	41	67	75.836	18	0	0	1	0	2	0	0	0	0	1						1	1	11.6	6.7	6.7	7.5836	1.8
1972	0	55	0	1	1	0	0	2	1	0	0	0	25.14	8.2	6.6	6.6	6.2	6.3	92.3333	256	281	49	167	93.8578	18	0	0	1	0	1	0	0	0	0	1						0	1	25.6	28.1	16.7	9.38578	1.8
1973	1	48	0	2	0	0	0	0	1	0	1	1	30.6	10.4	8.3	7.2	6.9	7.4	92.3333	205	68	46	132	120.49	47	0	0	1	0	1	0	0	0	0	1						1	2	20.5	6.8	13.2	12.049	4.7
1974	1	53	1	2	1	1	0	1	1	1	1	0	25.59	12.6	10	7.7	7.6	7.4	107	131	86	29	83	71.5219	17	2	1	0	0	1	0	0	0	0	1						1	1	13.1	8.6	8.3	7.15219	1.7
1975	1	61	0	2	0	0	0	2	0	1	1	0	20.62	9.1	9.1	9.4	8.3	7.7	92	170	170	70	67	83.6889	24	0	0	1	0	3	0	0	0	0	1						1	2	17	17	6.7	8.36889	2.4
1976	1	46	0	2	0	0	0	0	1	0	1	0	19.32	12.4	12.4	10.4	7.1	7.1	93	277	255	65	168	97.2976	18	1	0	0	0	2	0	0	0	0	1						1	1	27.7	25.5	16.8	9.72976	1.8
1977	0	51	0	3	1	0	0	0	1	0	1	0	19.63	8.4	6.7	6.9	7	6.4	92.3333	211	102	61	122	95.2961	17	0	0	0	0	1	0	0	0	0	1						0	1	21.1	10.2	12.2	9.52961	1.7
1978	0	54	1	2	1	0	0	1	1	1	1	1	25.85	11.5	5.9	5.9	6.5	6.4	100.667	140	70	33	91	113.76	22	0	1	0	0	1	0	0	0	0	1						0	2	14	7	9.1	11.376	2.2
1979	0	63	1	3	1	0	0	2	1	1	1	1	26.38	9.7	6.6	7.6	7.5	6.6	101.333	218	91	42	167	87.4659	32	0	1	1	0	1	0	0	0	0	1						0	2	21.8	9.1	16.7	8.74659	3.2
1980	0	48	0	2	1	0	0	0	1	#NULL!	#NULL!	0	23.19	10.6	6.9	6.2	6.2	6.3	87.6667	251	112	89	136	123.12	12	0	0	1	0	1	0	0	0	0	1						0	2	25.1	11.2	13.6	12.312	1.2
1981	0	50	1	2	0	0	0	0	1	0	0	0	28.13	11.1	6.2	5.7	7	7	110.333	221	498	35	127	58.4328	248	0	1	0	1	2	0	0	0	0	1						0	1	22.1	49.8	12.7	5.84328	24.8
1982	1	46	0	2	0	0	0	2	1	1	1	1	28.67	8.7	6.3	6.2	6.2	7.1	98	222	97	63	147	90.0863	36	0	1	0	0	4	0	0	0	0	1						1	1	22.2	9.7	14.7	9.00863	3.6
1983	0	37	1	2	0	0	0	1	1	0	1	0	23.78	13.8	5.3	5.2	5.4	5.5	82.6667	158	55	31	110	108.775	116	0	0	0	0	2	0	0	0	0	1						0	1	15.8	5.5	11	10.8775	11.6
1984	0	51	0	2	1	0	0	2	1	1	1	1	25.76	10.2	6.3	5.4	5.3	5.4	108.667	111	87	40	52	119.02	27	0	1	1	0	3	0	0	0	0	1						0	2	11.1	8.7	5.2	11.902	2.7
1985	0	31	1	3	1	0	0	2	1	#NULL!	#NULL!	1	29.51	10.6	6.3	6.1	6.1	6.1	108.667	224	171	48	145	170.17	30	0	0	1	0	1	0	0	0	0	1						0	2	22.4	17.1	14.5	17.017	3
1986	0	63	1	1	0	0	0	2	1	1	1	1	22.68	10.3	5.7	5.3	5.3	5.6	90.6667	193	170	48	121	61.15	12	0	1	0	1	1	0	0	0	0	1						0	1	19.3	17	12.1	6.115	1.2
1987	1	52	1	3	1	0	0	2	1	0	1	0	21.43	13.4	8.8	8.1	7.3	7.5	92.6667	185	174	57	110	68.5755	14	0	1	0	0	1	0	0	0	0	1						1	1	18.5	17.4	11	6.85755	1.4
1988	1	45	0	2	1	0	0	0	1	1	1	0	27.63	8.5	7.3	7	7.2	7.2	112.333	231	150	47	133	90.0863	103	0	1	1	0	2	0	0	0	0	1						1	1	23.1	15	13.3	9.00863	10.3
1989	0	45	1	2	0	1	1	0	1	0	1	0	30.8	8	6.3	6.3	6.4	6.3	116	253	223	68	159	70.5882	16	0	1	1	1	4	0	0	0	0	1						0	1	25.3	22.3	15.9	7.05882	1.6
1990	1	51	1	2	0	0	0	0	1	1	1	0	27.78	9.1	6.6	6.6	6.3	7.2	98	145	215	30	78	125.058	43	0	0	0	1	1	0	0	0	0	1						1	2	14.5	21.5	7.8	12.5058	4.3
1991	1	52	0	2	0	0	0	1	1	1	1	1	36.79	8	7.7	8.2	7.2	7.8	89	147	70	48	84	113.68	22	0	1	1	0	2	0	0	0	0	1						1	2	14.7	7	8.4	11.368	2.2
1992	0	58	1	1	0	0	0	0	1	1	0	1	27.71	8.6	7.3	6.8	6.8	7	85.6667	161	99	62	93	93.1173	39	0	0	1	0	1	0	0	0	0	1						0	1	16.1	9.9	9.3	9.31173	3.9
1993	1	42	1	2	0	1	0	0	1	0	0	0	25.93	14.2	6.1	6.4	8.2	10.4	86	211	388	33	128	164.304	22	0	0	1	0	1	0	0	0	0	1						1	1	21.1	38.8	12.8	16.4304	2.2
1994	1	57	0	2	1	0	0	0	1	1	1	1	21.44	8.5	7.9	8.3	9.8	10.1	98.6667	245	191	55	155	127.17	41	0	0	1	0	2	1	0	0	0	1						1	2	24.5	19.1	15.5	12.717	4.1
1995	1	39	1	2	0	0	0	0	1	#NULL!	#NULL!	0	27.55	8	7.2	7.7	7.8	8.2	88	235	180	46	150	93.9412	101	0	1	1	0	2	0	0	0	0	1						1	1	23.5	18	15	9.39412	10.1
1996	0	34	1	3	1	0	1	0	1	1	1	0	30.39	9.4	5.8	5.7	5.6	5.4	99	156	102	35	102	124.96	38	0	0	0	0	1	0	0	0	0	1						0	2	15.6	10.2	10.2	12.496	3.8
1997	0	63	0	1	0	0	0	2	1	1	1	0	22.44	12.9	7.9	7	6.5	6.5	80	122	123	52	44	104.998	20	0	0	0	0	1	0	0	0	0	1						0	2	12.2	12.3	4.4	10.4998	2
1998	0	64	1	1	0	0	0	0	1	0	1	0	23.2	8.7	10.6	6.4	6.1	6.3	86	147	114	39	84	80.9574	16	0	0	0	0	1	0	0	0	0	1						0	1	14.7	11.4	8.4	8.09574	1.6
1999	0	46	0	1	0	0	0	0	1	0	0	0	23.37	11.4	6.4	5.7	5.5	5.9	89.3333	202	42	64	125	107.626	15	0	0	0	0	1	0	0	0	0	1						0	1	20.2	4.2	12.5	10.7626	1.5
[truncated: 2,283 more rows]

## Sheet: Codebook
Variable name	Variable label	Measures	Value (code)	Value label (categorical variables)	Unit (continuous variable)	ID
Treatment_Failure	treatment failure	categorical	0	No
			1	Yes
Age_yrs	age at diagnosis	continuous			(years)
Gender	gender	categorical	0	Women
			1	Men
Education	education level	categorical	0	None
			1	Primaryschool
			2	Highschool
			3	University or above
Family_Hx_DM	family history of DM	categorical	0	No (without family history of DM)
			1	Yes (with family history of DM)
Smoking	smoking status	categorical	0	No
			1	Yes
Alcohol	alcohol drinking	categorical	0	No
			1	Yes
Physical_activity	physical activity	categorical	0	No
			1	Occasional exercise
			2	Regular exercise
Medication_adherence	medication_adherence	categorical	0	No (poor adherence)
			1	Yes (good adherence)
Knowledge_GC	knowledge regarding glycemic control	categorical	0	No (poor knowledge)
			1	Yes (good knowledge)
Willingness_DSM	willingness toward diabetes self-management	categorical	0	No (poor)
			1	Yes (good)
SMBG	perform self-monitoring of blood glucose	categorical	0	No (without SMBG)
			1	Yes (with SMBG)
BMI	body mass index	continuous			(kg/m2)
HbA1c_baseline_%	HbA1c at baseline	continuous			(%)
HbA1c_3M_%	HbA1c at 3-month	continuous			(%)
HbA1c_6M_%	HbA1c at 6-month	continuous			(%)
HbA1c_9M_%	HbA1c at 9-month	continuous			(%)
HbA1c_12M_%	HbA1c at 12-month	continuous			(%)
Mean_BP_mmHg	mean blood pressure	continuous			(mmHg)
Total_Cholesterol_mg/dl	total_cholesterol	continuous			(mg/dL)
Triglyceride_mg/dl	triglycerides	continuous			(mg/dL)
HDL_mg/dl	HDL-cholesterol	continuous			(mg/dL)
LDL_mg/dl	LDL-cholesterol	continuous			(mg/dL)
eGFR	eGFR	continuous			(ml/min/1.73m2)
GPT_U/L	GPT	continuous			(U/L)
Anti_diabetic_medication	use of anti-diabetic medication	categorical	0	None or OAD alone
			1	Insulin alone
			2	OAD with insulin
Anti_hypertension_agent	use of anti-hypertension agents	categorical	0	No
			1	Yes
Use_of_statins	use of statins	categorical	0	No
			1	Yes
Use_of_fibrates	use of fibrates	categorical	0	No
			1	Yes
Comorbidity_CCI score	Charson comorbidity index (score)	continuous			(point)
CHF_baseline	with congestive heart failure at enrollment	categorical	0	No
			1	Yes
CAD_baseline	with coronary artery disease at enrollment	categorical	0	No
			1	Yes
CVA_baseline	with cerebrovascular accident at enrollment	categorical	0	No
			1	Yes
HbA1c≥8_subgroup	for sugroup analysis	categorical	0	No (HbA1c<8%)
			1	Yes (HbA1c≥8%)
